# Supplementary material for: Gold(i)-catalyzed diastereo- and enantioselective [4 + 3] cycloadditions: construction of functionalized furano-benzoxepins
Source: Royal Society of Chemistry journal article supplement (doi:10.1039/d2qo01070d), 2022-01-01
Supplement: d2qo01070d1.pdf [file d2qo01070d1.pdf]

## SUPPORTING INFORMATION

### **Gold(I)-Catalyzed Diastereo- and Enantioselective [4+3] Cycloadditions: Construction of Functionalized Furano- benzoxepins**

Xunhua Wang, Ruifeng Lv, and Xiaoxun Li\*

Department of Medicinal Chemistry, Key Laboratory of Chemical Biology (Ministry of Education) and NMPA Key Laboratory for Technology Research and Evaluation of Drug Products, School of Pharmaceutical Sciences, Cheeloo College of Medicine, Shandong University, Jinan, Shandong, 250012, China.

Suzhou Research Institute, Shandong University, Suzhou, Jiangsu 215123, China

\*Correspondence to: xli@sdu.edu.cn.

## Table of Contents

|                                                                          |     |
|--------------------------------------------------------------------------|-----|
| 1. General information .....                                             | 3   |
| 2. Reaction optimization .....                                           | 4   |
| 3. Representative procedure and data for the synthesis of <b>3</b> ..... | 8   |
| 4. Large-scale reactions and synthetic Transformations.....              | 32  |
| 5. X-ray Crystallography data.....                                       | 39  |
| 6. References.....                                                       | 49  |
| 7. NMR spectra .....                                                     | 50  |
| 8. Copies of HPLC spectra. ....                                          | 100 |

## 1. General Information

Unless otherwise noted, all the reactions for the preparation of the substrates were performed in oven-dried glassware under nitrogen atmosphere with freshly distilled solvents. The catalytic reactions were performed under nitrogen atmosphere. The solvents were purified by distillation from calcium hydride unless otherwise noted. All other commercial reagents were used without further purification unless otherwise indicated.  $^1\text{H}$  NMR and  $^{13}\text{C}$  NMR spectra were recorded on Bruker 400 MHz spectrometer (ADVANCE III) using chloroform-*d* ( $\text{CDCl}_3$ ) and dimethyl sulphoxide-*d*<sub>6</sub> (DMSO- *d*<sub>6</sub>) as the internal standard. Chemical shifts were reported in parts per million (ppm), and the residual solvent peak was used as an internal reference: proton (chloroform  $\delta$  7.26), carbon (chloroform  $\delta$  77.10) or tetramethylsilane (TMS  $\delta$  0.00) was used as a reference. Data are reported as follows: chemical shift, multiplicity (s = singlet, d = doublet, t = triplet, q = quartet, m = multiplet, br = broad), coupling constants (Hz) and integration. The enantiomeric excesses (e.e.) was determined by HPLC analysis on LC-20AD/T LPGE KIT using Daicel CHIRALPAK® column IA-3. X-ray diffraction analyses were carried out on a microcrystalline powder using a Rigaku Oxford Diffraction XtaLAB Synergy-S diffractometer using Cu radiation ( $\lambda = 1.54184 \text{ \AA}$ ). If not specially mentioned, flash column chromatography was performed using 200-300 silica gel purchased from Yantai Chemicals (China). High-resolution mass spectra (HRMS) were recorded on a Bruker Apex IV FTMS mass spectrometer using ESI (electrospray ionization) as ionization method. Optical rotations were recorded on an AUTOPOL II digital polarimeter at 589 nm and are recorded as  $[\alpha]_{\text{D}}^{\text{T}}$  (concentration in grams/100 mL solvent). The 2-(1-alkynyl)-2-alken-1-ones <sup>[1-2]</sup> and *ortho*-quinone methides <sup>[3-4]</sup> were prepared according to the reported procedures.

## 2. Reaction Optimization

**Table S1. Investigation of chiral ligands**

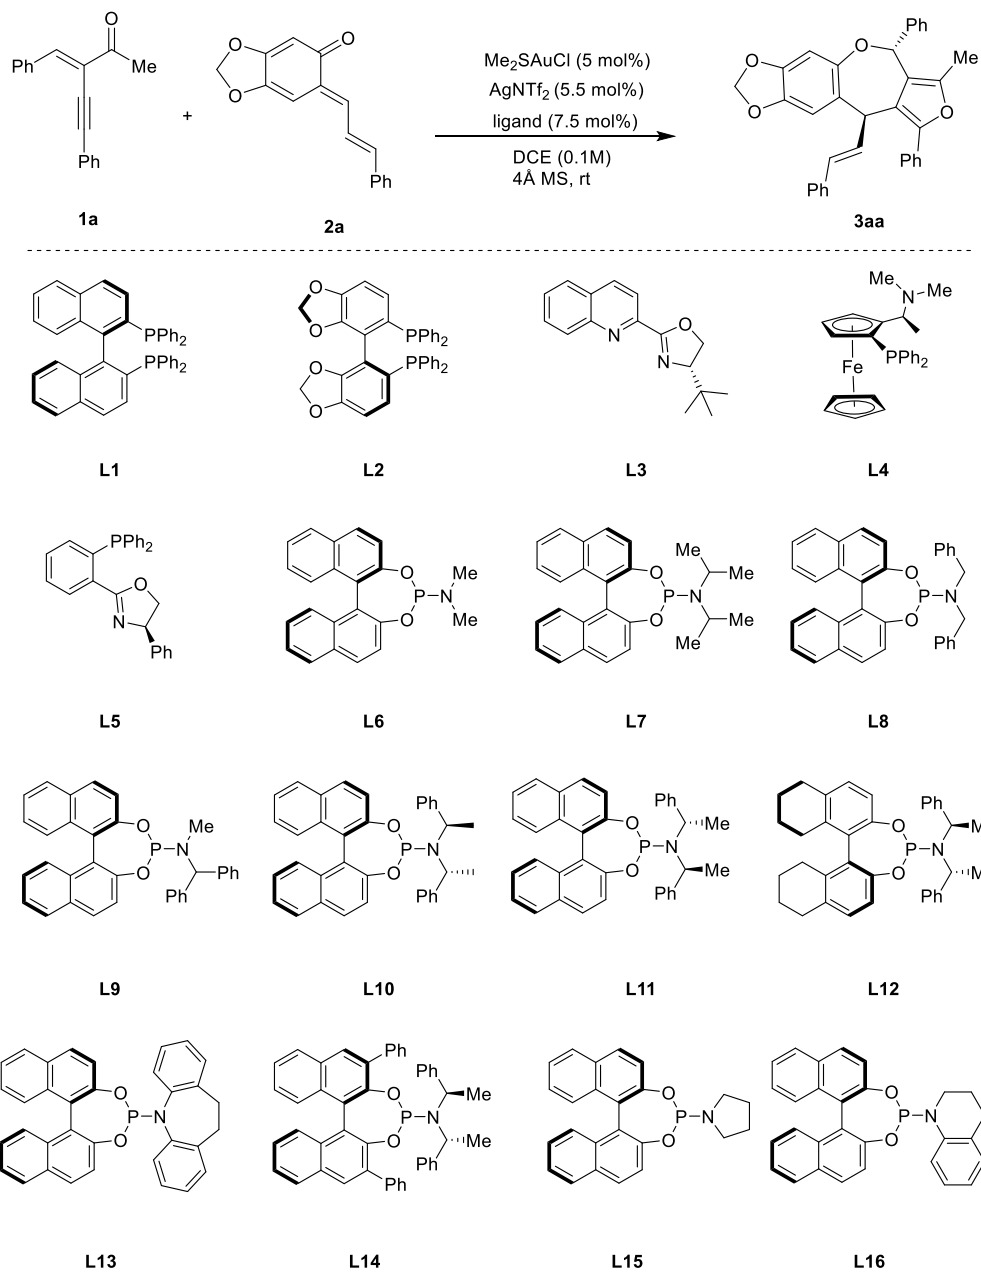

| Entry | Ligand | Yield <sup>b</sup> | ee <sup>c</sup> |
|-------|--------|--------------------|-----------------|
| 1     | L1     | trace              | --              |
| 2     | L2     | trace              | --              |
| 3     | L3     | NR                 | --              |
| 4     | L4     | 33%                | 21%             |
| 5     | L5     | 58%                | 7%              |
| 6     | L6     | 88%                | 57%             |
| 7     | L7     | 74%                | 75%             |
| 8     | L8     | 65%                | 60%             |
| 9     | L9     | 49%                | 29%             |
| 10    | L10    | 76%                | 77%             |
| 11    | L11    | 78%                | 85%             |
| 12    | L12    | 80%                | 93%             |
| 13    | L13    | 56%                | 27%             |
| 14    | L14    | trace              | --              |
| 15    | L15    | 48%                | 19%             |
| 16    | L16    | 65%                | 55%             |

<sup>a</sup> Unless otherwise indicated, all reactions were performed with **1a** (0.1 mmol) and **2a** (0.13 mmol) in the presence of Me<sub>2</sub>SAuCl (5 mol%), ligand (7.5 mol%), AgNTf<sub>2</sub> (5.5 mol%) in DCE (1.0 mL) at room temperature under nitrogen atmosphere. <sup>b</sup> Isolated yield of product **3aa**. <sup>c</sup> Determined by HPLC analysis.

After optimization, **L12** was selected for the next investigation.

**Table S2. Investigation of solvents and temperature**

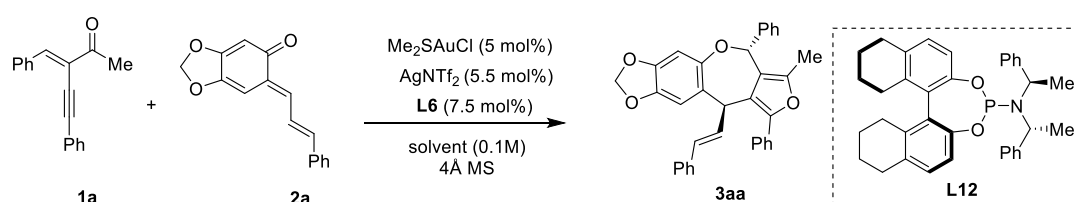

| Entry | Temperature | Solvent           | Yield <sup>b</sup> | ee <sup>c</sup> |
|-------|-------------|-------------------|--------------------|-----------------|
| 1     | rt          | THF               | trace              | --              |
| 2     | rt          | DCM               | 70%                | 93%             |
| 3     | rt          | toluene           | 35%                | 90%             |
| 4     | rt          | CHCl <sub>3</sub> | 75%                | 92%             |
| 5     | rt          | MeCN              | trace              | --              |
| 6     | 10 °C       | DCE               | 75%                | 93%             |
| 7     | 0 °C        | DCE               | 64%                | 93%             |
| 8     | -10 °C      | DCE               | 32%                | 94%             |

Unless otherwise indicated, all reactions were performed with **1a** (0.1 mmol) and **2a** (0.13 mmol) in the presence of Me<sub>2</sub>SAuCl (5 mol%), **L12** (7.5 mol%), AgNTf<sub>2</sub> (5.5 mol%) in solvent (1.0 mL) at room temperature or 10 °C or 0 °C or -10 °C under nitrogen atmosphere. <sup>b</sup> Isolated yield of product **3aa**. <sup>c</sup> Determined by HPLC analysis.

After optimization, the reaction with DCE as solvent at room temperature showed the optimal result.

### Table S3. Investigation of silver salts

| Entry | AgX                | Yield <sup>b</sup> | ee <sup>c</sup> |
|-------|--------------------|--------------------|-----------------|
| 1     | AgOTf              | 51%                | 92%             |
| 2     | AgNTf <sub>2</sub> | 80%                | 93%             |
| 3     | AgBF <sub>4</sub>  | 43%                | 93%             |
| 4     | AgPF <sub>6</sub>  | 60%                | 93%             |
| 5     | AgSbF <sub>6</sub> | 81%                | 92%             |

<sup>a</sup> Unless otherwise indicated, all reactions were performed with **1a** (0.1 mmol) and **2a** (0.13 mmol) in the presence of Me<sub>2</sub>SAuCl (5 mol%), **L12** (7.5 mol%), AgX (5.5 mol%) in DCE (1.0 mL) at room temperature under nitrogen atmosphere. <sup>b</sup> Isolated yield of product **3aa**. <sup>c</sup> Determined by HPLC analysis.

After optimization, the reaction with AgNTf<sub>2</sub> showed the best result.

**Table S4. Investigation of solvents and temperature**

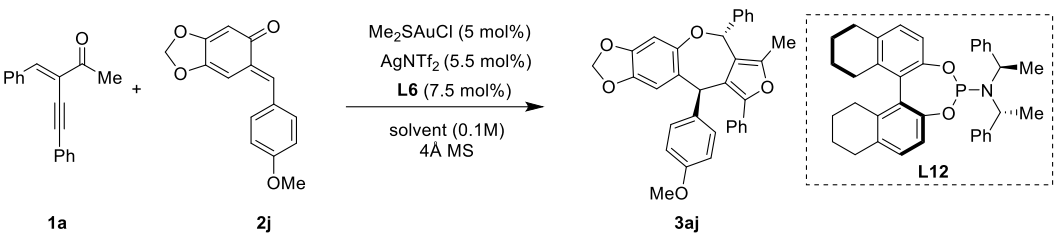

| Entry | Temperature | Solvent           | Yield <sup>b</sup> | ee <sup>c</sup> |
|-------|-------------|-------------------|--------------------|-----------------|
| 1     | rt          | DCE               | 75%                | 77%             |
| 2     | 0 °C        | DCE               | 71%                | 80%             |
| 3     | -10 °C      | DCE               | 55%                | 82%             |
| 4     | -10 °C      | DCM               | 75%                | 86%             |
| 5     | -10 °C      | CHCl <sub>3</sub> | 65%                | 88%             |
| 6     | -10 °C      | TCE               | 72%                | 86%             |
| 7     | -10 °C      | PhCl              | 80%                | 83%             |
| 9     | -10 °C      | PhF               | 74%                | 90%             |
| 10    | -10 °C      | PhCl <sub>2</sub> | 72%                | 88%             |
| 11    | -20 °C      | PhF               | 76%                | 92%             |
| 12    | -30 °C      | PhF               | 66%                | 92%             |

Unless otherwise indicated, all reactions were performed with **1a** (0.1 mmol) and **2j** (0.13 mmol) in the presence of Me<sub>2</sub>SAuCl (5 mol%), **L12** (7.5 mol%), AgNTf<sub>2</sub> (5.5 mol%) in solvent (1.0 mL) under nitrogen atmosphere. <sup>b</sup> Isolated yield of product **3aj**.

<sup>c</sup> Determined by HPLC analysis.

After optimization, the best reaction condition was with the PhF at -20°C, which was selected as the standard condition.

### 3. Representative procedure and data for the synthesis of **3**

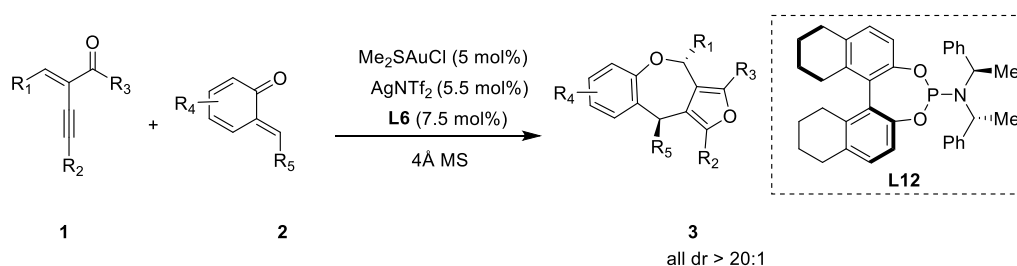

**General procedure 1:** Under nitrogen atmosphere, a solution of **L12** (7.5 mol%) and  $\text{Me}_2\text{SAuCl}$  (5 mol%) in DCE (0.5 mL) was stirred at room temperature for 2 h, then the solvent was removed in vacuum. Next,  $\text{AgNTf}_2$  (5.5 mol%) and DCE (0.5 mL) was added to the residue, and the mixture was stirred at room temperature for 15 min. Then the precipitate was removed and the remaining solution was transferred into a solution of ketone substrate **1** (0.1 mmol, 1.0 equiv.) and *ortho* quinone methides **2** (0.13 mmol, 1.3 equiv.) with 4 Å molecular sieves 300 mg in DCE (0.5 mL) at room temperature. Once the reaction was complete as indicated by TLC, the solvent was removed under reduced pressure, and the residue was purified by a silica gel column using ethyl acetate/ petroleum ether (1/60-1/4) as the eluent to give product **3**.

**General procedure 2:** Under nitrogen atmosphere, a solution of **L12** (7.5 mol%) and  $\text{Me}_2\text{SAuCl}$  (5 mol%) in DCE (0.5 mL) was stirred at room temperature for 2 h, then the solvent was removed in vacuum. Next,  $\text{AgNTf}_2$  (5.5 mol%) and PhF (0.5 mL) was added to the residue, and the mixture was stirred at room temperature for 15 min. Then the precipitate was removed and the remaining solution was transferred into a solution of ketone substrate **1** (0.1 mmol, 1.0 equiv.) and *ortho* quinone methides **2** (0.13 mmol, 1.3 equiv.) with 4 Å molecular sieves 300 mg in PhF (0.5 mL) at  $-20\text{ }^\circ\text{C}$ . Once the reaction was complete as indicated by TLC, the solvent was removed under reduced pressure, and the residue was purified by a silica gel column using ethyl acetate/ petroleum ether (1/40-1/4) as the eluent to give product **3**.



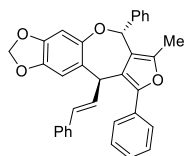

**(6R,10S)-7-methyl-6,9-diphenyl-10-((E)-styryl)-6H,10H [1,3] dioxolo[4',5':4,5] benzo[1,2-b] furo[3,4-e] oxepine (3aa)**

According to general procedure 1: White solid, m.p. = 96-98 °C, 40 mg; 80% yield; 93% ee;  $[\alpha]_{\text{D}}^{20.0} = -8.0$  (0.1, CH<sub>2</sub>Cl<sub>2</sub>); [Daicel Chiralpak IA-3 (0.45 cm ×25 cm), *n*-hexane/2-propanol = 97/3,  $v = 1.0 \text{ mL} \cdot \text{min}^{-1}$ ,  $\lambda = 254 \text{ nm}$ ,  $t$  (major) =9.3 min,  $t$  (minor) =7.4 min]; <sup>1</sup>H NMR (400 MHz, CDCl<sub>3</sub>);  $\delta$  1.81 (s, 3H), 4.67 (d,  $J = 5.9 \text{ Hz}$ , 1H), 5.68 (s, 1H), 5.77 (s, 2H), 6.34 (s, 1H), 6.49 (d,  $J = 15.9 \text{ Hz}$ , 1H), 6.65 (s, 1H), 6.82 (dd,  $J = 5.9, 15.9 \text{ Hz}$ , 1H), 7.09 (d,  $J = 6.1 \text{ Hz}$ , 2H), 7.17 (t,  $J = 7.2 \text{ Hz}$ , 1H), 7.22-7.30 (m, 5H), 7.32 (d,  $J = 7.5 \text{ Hz}$ , 1H), 7.38 (d,  $J = 7.8 \text{ Hz}$ , 2H), 7.44 (t,  $J = 7.5 \text{ Hz}$ , 2H), 7.65 (d,  $J = 8.0 \text{ Hz}$ , 2H); <sup>13</sup>C NMR (100 MHz, CDCl<sub>3</sub>)  $\delta$  12.8, 44.8, 78.7, 101.2, 107.2, 108.3, 119.9, 120.4, 126.3, 126.5, 127.2, 127.3, 128.2, 128.5, 128.6, 128.8, 129.4, 129.5, 130.2, 131.3, 132.2, 137.4, 138.9, 143.9, 146.3, 147.0, 147.1, 147.6; HRMS (ESI)  $m/z$  calcd. for C<sub>34</sub>H<sub>27</sub>O<sub>4</sub> [M+H]<sup>+</sup>: 499.1904, found: 499.1901.

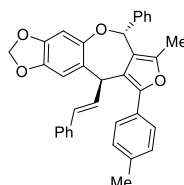

**(6R,10S)-6,9-diphenyl-10-((E)-styryl)-7-(p-tolyl)-6H,10H-[1,3]dioxolo [4',5':4,5] benzo[1,2-b] furo [3,4-e] oxepine (3ba)**

According to general procedure 1: White solid, m.p. = 90-92 °C, 45 mg; 88% yield; 90% ee;  $[\alpha]_{\text{D}}^{20.0} = -1.0$  (0.1, CH<sub>2</sub>Cl<sub>2</sub>); [Daicel Chiralpak IA-3 (0.45 cm×25 cm), *n*-hexane/2-propanol = 97/3,  $v = 1.0 \text{ mL} \cdot \text{min}^{-1}$ ,  $\lambda = 254 \text{ nm}$ ,  $t$  (major) =9.6 min,  $t$  (minor) =6.9 min]; <sup>1</sup>H NMR (400 MHz, CDCl<sub>3</sub>)  $\delta$  1.80 (s, 3H), 2.39 (s, 3H), 4.64 (d,  $J = 5.8 \text{ Hz}$ , 1H), 5.68 (s, 1H), 5.77 (s, 2H), 6.33 (s, 1H), 6.48 (d,  $J = 15.9 \text{ Hz}$ , 1H), 6.64 (s, 1H), 6.82 (dd,  $J = 5.9, 15.9 \text{ Hz}$ , 1H), 7.10 (d,  $J = 6.1 \text{ Hz}$ , 2H), 7.17 (t,  $J = 7.3 \text{ Hz}$ , 1H), 7.22-7.29 (m, 7H), 7.38 (d,  $J = 7.6 \text{ Hz}$ , 2H), 7.54 (d,  $J = 7.9 \text{ Hz}$ , 2H); <sup>13</sup>C NMR (100 MHz, CDCl<sub>3</sub>)  $\delta$  12.8, 21.4, 44.8, 78.8, 101.2, 107.2, 108.3, 119.8, 126.3, 126.5, 127.2, 128.1, 128.2, 128.4, 128.5, 128.6, 129.4, 129.5, 129.6, 130.3, 132.4, 137.2, 137.5, 138.9, 143.9,

146.3, 146.7, 147.2, 147.7; HRMS (ESI)  $m/z$  calcd. for  $C_{35}H_{29}O_4$   $[M+H]^+$ : 513.2060, found: 513.2052.

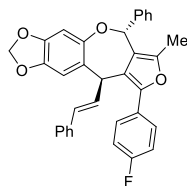

**(6R,10S)-7-(4-fluorophenyl)-6,9-diphenyl-10-((E)-styryl)-6H,10H-[1,3]dioxolo[4',5':4,5]benzo[1,2-b]furo[3,4-e]oxepine (3ca)**

According to general procedure 1: White solid, m.p. = 100-102 °C; 42 mg, 81% yield; 92% ee;  $[\alpha]_D^{20.0} = -15.9$  (0.1,  $CH_2Cl_2$ ); [Daicel Chiralpak IA-3 (0.45 cm  $\times$  25 cm), *n*-hexane/2-propanol = 97/3,  $v = 1.0$  mL $\cdot$ min $^{-1}$ ,  $\lambda = 254$  nm,  $t$  (major) = 9.9 min,  $t$  (minor) = 7.3 min];  $^1H$  NMR (400 MHz,  $CDCl_3$ )  $\delta$  1.80 (s, 3H), 4.58 (s, 1H), 5.68 (s, 1H), 5.78 (s, 2H), 6.33 (s, 1H), 6.47 (d,  $J = 15.9$  Hz, 1H), 6.64 (s, 1H), 6.80 (dd,  $J = 6.0, 15.9$  Hz, 1H), 7.07-7.21 (m, 5H), 7.23-7.32 (m, 5H), 7.38 (d,  $J = 7.5$  Hz, 2H), 7.61 (dd,  $J = 5.4, 8.6$  Hz, 2H);  $^{13}C$  NMR (100 MHz,  $CDCl_3$ )  $\delta$  12.8, 44.9, 78.7, 101.2, 107.2, 108.2, 115.8 (d,  $J = 21.6$  Hz), 120.0, 120.1, 126.6, 127.3, 127.5 (d,  $J = 3.3$  Hz), 128.1, 128.2, 128.5, 128.7, 129.5, 129.6, 130.0, 132.1, 137.3, 138.8, 144.0, 146.2, 146.4, 147.1, 147.7, 162.2 (d,  $J = 247.3$  Hz); HRMS (ESI)  $m/z$  calcd. for  $C_{34}H_{26}FO_4$   $[M+H]^+$ : 517.1810, found: 517.1802.

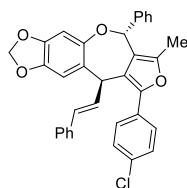

**(6R,10S)-9-(4-chlorophenyl)-7-methyl-6-phenyl-10-((E)-styryl)-6H,10H-[1,3]Dioxolo[4',5':4,5]benzo[1,2-b]furo[3,4-e]oxepine (3da)**

According to general procedure 1: White solid, m.p. = 140-142 °C; 33 mg, 62% yield; 91% ee;  $[\alpha]_D^{20.0} = 0.8$  (0.1,  $CH_2Cl_2$ ); [Daicel Chiralpak IA-3 (0.45 cm  $\times$  25 cm), *n*-hexane/2-propanol = 97/3,  $v = 1.0$  mL $\cdot$ min $^{-1}$ ,  $\lambda = 254$  nm,  $t$  (major) = 10.7 min,  $t$  (minor) = 7.3 min];  $^1H$  NMR (400 MHz,  $CDCl_3$ )  $\delta$  1.81 (s, 3H), 4.59 (d,  $J = 5.3$  Hz, 1H), 5.67 (s, 1H), 5.79 (s, 2H), 6.33 (s, 1H), 6.46 (d,  $J = 15.8$  Hz, 1H), 6.64 (s, 1H), 6.79 (dd,  $J = 6.0, 15.9$  Hz, 1H), 7.09 (d,  $J = 6.4$  Hz, 2H), 7.19 (t,  $J = 7.2$  Hz, 1H), 7.23-7.32 (m, 5H),

7.39 (dd,  $J = 8.1, 11.7$  Hz, 4H), 7.58 (d,  $J = 8.5$  Hz, 2H);  $^{13}\text{C}$  NMR (100 MHz,  $\text{CDCl}_3$ )  $\delta$  12.9, 44.9, 78.7, 101.3, 107.2, 108.2, 120.2, 120.9, 126.6, 127.3, 127.5, 128.2, 128.5, 128.7, 129.0, 129.5, 129.7, 129.8, 130.0, 131.9, 133.1, 137.3, 138.7, 144.0, 146.0, 146.4, 147.5, 147.6; HRMS (ESI)  $m/z$  calcd. for  $\text{C}_{34}\text{H}_{26}\text{ClO}_4$   $[\text{M}+\text{H}]^+$ : 533.1514, found: 533.1512.

**(6R,10S)-9-(4-bromophenyl)-7-methyl-6-phenyl-10-((E)-styryl)-6H,10H-[1,3]dioxolo [4',5':4,5] benzo[1,2-b] furo[3,4-e] oxepine (3ea)**

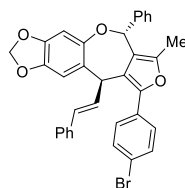

According to general procedure 1: Yellow solid, m.p. = 110-112 °C; 50 mg, 86% yield; 93% ee;  $[\alpha]_{\text{D}}^{20.0} = -0.6$  (0.1,  $\text{CH}_2\text{Cl}_2$ ); [Daicel Chiralpak IA-3 (0.45 cm  $\times$  25 cm), *n*-hexane/2-propanol = 97/3,  $v = 1.0$  mL $\cdot$ min $^{-1}$ ,  $\lambda = 254$  nm,  $t$  (major) = 11.7 min,  $t$  (minor) = 7.8 min];  $^1\text{H}$  NMR (400 MHz,  $\text{CDCl}_3$ )  $\delta$  1.80 (s, 3H), 4.59 (d,  $J = 5.6$  Hz, 1H), 5.67 (s, 1H), 5.78 (s, 2H), 6.33 (s, 1H), 6.46 (d,  $J = 15.9$  Hz, 1H), 6.64 (s, 1H), 6.79 (dd,  $J = 6.0, 15.9$  Hz, 1H), 7.08 (d,  $J = 6.3$  Hz, 2H), 7.18 (t,  $J = 7.3$  Hz, 1H), 7.22-7.31 (m, 5H), 7.37 (d,  $J = 7.5$  Hz, 2H), 7.48-7.58 (m, 4H);  $^{13}\text{C}$  NMR (100 MHz,  $\text{CDCl}_3$ )  $\delta$  12.9, 44.9, 78.6, 101.2, 107.2, 108.2, 120.2, 121.0, 121.2, 126.5, 127.3, 127.7, 128.2, 128.5, 128.7, 129.4, 129.7, 129.9, 130.1, 131.8, 131.9, 137.2, 138.7, 144.0, 146.0, 146.4, 147.5, 147.6; HRMS (ESI)  $m/z$  calcd. for  $\text{C}_{34}\text{H}_{26}\text{BrO}_4$   $[\text{M}+\text{H}]^+$ : 577.1009, found: 577.0999.

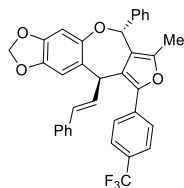

**(6R,10S)-7-methyl-6-phenyl-10-((E)-styryl)-9-(4-(trifluoromethyl)phenyl)-6H,10H- [1, 3] dioxolo [4',5':4,5] benzo[1,2-b] furo[3,4-e] oxepine (3fa)**

According to general procedure 1: White solid, m.p. = 96-98 °C; 42 mg, 74% yield; 94% ee;  $[\alpha]_{\text{D}}^{20.0} = -13.1$  (0.1,  $\text{CH}_2\text{Cl}_2$ ); [Daicel Chiralpak IA-3 (0.45 cm  $\times$  25 cm), *n*-hexane/2-propanol = 97/3,  $v = 1.0$  mL $\cdot$ min $^{-1}$ ,  $\lambda = 254$  nm,  $t$  (major) = 9.7 min,  $t$  (minor)

=6.7 min];  $^1\text{H}$  NMR (400 MHz,  $\text{CDCl}_3$ )  $\delta$  1.84 (s, 3H), 4.65 (d,  $J = 5.8$  Hz, 1H), 5.68 (s, 1H), 5.79 (s, 2H), 6.34 (s, 1H), 6.49 (d,  $J = 15.8$  Hz, 1H), 6.65 (s, 1H), 6.81 (dd,  $J = 6.0, 15.9$  Hz, 1H), 7.09 (d,  $J = 6.4$  Hz, 2H), 7.19 (t,  $J = 7.2$  Hz, 1H), 7.24-7.31 (m, 5H), 7.38 (d,  $J = 7.5$  Hz, 2H), 7.69 (d,  $J = 8.3$  Hz, 2H), 7.76 (d,  $J = 8.3$  Hz, 2H);  $^{13}\text{C}$  NMR (100 MHz,  $\text{CDCl}_3$ )  $\delta$  12.9, 44.9, 78.6, 101.3, 107.2, 108.2, 120.5, 122.4, 125.8 (q,  $J = 3.7$  Hz), 126.1, 126.6, 127.4, 128.3, 128.6, 125.7 (q,  $J = 10.5$  Hz), 128.8, 125.8 (q,  $J = 323.8$  Hz), 129.5, 129.8, 129.9, 131.6, 134.5, 137.2, 138.6, 144.1, 145.6, 146.5, 147.6, 148.4; HRMS (ESI)  $m/z$  calcd. for  $\text{C}_{35}\text{H}_{26}\text{F}_3\text{O}_4$   $[\text{M}+\text{H}]^+$ : 567.1777, found: 567.1772.

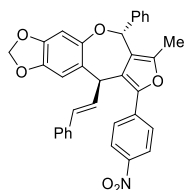

**(6R,10S)-7-methyl-9-(4-nitrophenyl)-6-phenyl-10-((E)-styryl)-6H,10H-[1,3]**

**dioxolo [4',5':4,5] benzo[1,2-b] furo[3,4-e] oxepine (3ga)**

According to general procedure 1: Red solid, m.p. = 170-172 °C; 38 mg, 70% yield; 94% ee;  $[\alpha]_{\text{D}}^{20.0} = -8.1$  (0.1,  $\text{CH}_2\text{Cl}_2$ ); [Daicel Chiralpak IA-3 (0.45 cm  $\times$  25 cm), *n*-hexane/2-propanol = 95/5,  $v = 1.0$  mL $\cdot$ min $^{-1}$ ,  $\lambda = 254$  nm,  $t$  (major) = 17.5 min,  $t$  (minor) = 10.9 min];  $^1\text{H}$  NMR (400 MHz,  $\text{CDCl}_3$ )  $\delta$  1.86 (s, 3H), 4.67 (d,  $J = 5.9$  Hz, 1H), 5.68 (s, 1H), 5.80 (s, 2H), 6.34 (s, 1H), 6.50 (d,  $J = 16.3$  Hz, 1H), 6.66 (s, 1H), 6.80 (dd,  $J = 5.9, 15.9$  Hz, 1H), 7.07 (d,  $J = 6.4$  Hz, 2H), 7.20 (t,  $J = 7.3$  Hz, 1H), 7.24-7.31 (m, 5H), 7.39 (d,  $J = 7.5$  Hz, 2H), 7.80 (d,  $J = 8.9$  Hz, 2H), 8.30 (d,  $J = 8.9$  Hz, 2H);  $^{13}\text{C}$  NMR (100 MHz,  $\text{CDCl}_3$ )  $\delta$  13.0, 45.1, 78.5, 101.3, 107.2, 108.2, 121.2, 124.3, 124.4, 126.0, 126.6, 127.6, 128.3, 128.6, 128.9, 129.4, 129.5, 130.1, 131.1, 137.0, 137.1, 138.3, 144.2, 144.9, 146.2, 146.6, 147.6, 149.6; HRMS (ESI)  $m/z$  calcd. for  $\text{C}_{34}\text{H}_{26}\text{NO}_6$   $[\text{M}+\text{H}]^+$ : 544.1755, found: 544.1728.

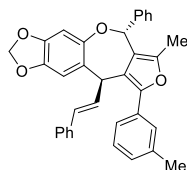

**(6R,10S)-6,9-diphenyl-10-((E)-styryl)-7-(m-tolyl)-6H,10H- [1,3] dioxolo [4',5':4,5] benzo[1,2-b] furo[3,4-e] oxepine (3ha)**

According to general procedure 1: White solid, m.p. = 88-90°C; 39 mg, 76% yield; 90% ee;  $[\alpha]_{\text{D}}^{20.0} = -8.8$  (0.1, CH<sub>2</sub>Cl<sub>2</sub>); [Daicel Chiralpak IA-3 (0.45 cm×25 cm), *n*-hexane/2-propanol = 97/3,  $\nu = 1.0 \text{ mL}\cdot\text{min}^{-1}$ ,  $\lambda = 254 \text{ nm}$ ,  $t$  (major) = 7.6 min,  $t$  (minor) = 6.9 min]; <sup>1</sup>H NMR (400 MHz, CDCl<sub>3</sub>)  $\delta$  1.80 (s, 3H), 2.41 (s, 3H), 4.65 (d,  $J = 6.0 \text{ Hz}$ , 1H), 5.68 (s, 1H), 5.76 (s, 2H), 6.34 (s, 1H), 6.50 (d,  $J = 15.9 \text{ Hz}$ , 1H), 6.65 (s, 1H), 6.85 (dd,  $J = 6.2, 15.9 \text{ Hz}$ , 1H), 7.09 (d,  $J = 6.1 \text{ Hz}$ , 2H), 7.16 (dd,  $J = 7.6, 15.8 \text{ Hz}$ , 2H), 7.22-7.31 (m, 5H), 7.34 (d,  $J = 7.7 \text{ Hz}$ , 1H), 7.39 (d,  $J = 7.6 \text{ Hz}$ , 2H), 7.45 (d,  $J = 7.6 \text{ Hz}$ , 1H), 7.50 (s, 1H); <sup>13</sup>C NMR (100 MHz, CDCl<sub>3</sub>)  $\delta$  12.8, 21.7, 45.0, 78.7, 101.2, 107.1, 108.2, 119.9, 120.4, 123.5, 126.5, 127.1, 127.2, 128.2, 128.4, 128.4, 128.5, 128.6, 129.5, 129.6, 130.3, 131.2, 132.3, 137.5, 138.3, 138.9, 144.0, 146.3, 147.0, 147.1, 147.2, 147.6; HRMS (ESI)  $m/z$  calcd. for C<sub>35</sub>H<sub>29</sub>O<sub>4</sub> [M+H]<sup>+</sup>: 513.2060, found: 513.2056.

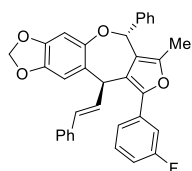

**(6R,10S)-9-(3-fluorophenyl)-7-methyl-6-phenyl-10-((E)-styryl)-6H,10H-[1,3]dioxolo[4',5':4,5] benzo[1,2-b]furo[3,4-e]oxepine (3ia)**

According to general procedure 1: White solid, m.p. = 84-86 °C; 35 mg, 68% yield; 93% ee;  $[\alpha]_{\text{D}}^{20.0} = 1.6$  (0.1, CH<sub>2</sub>Cl<sub>2</sub>); [Daicel Chiralpak IA-3 (0.45 cm ×25 cm), *n*-hexane/2-propanol = 97/3,  $\nu = 1.0 \text{ mL}\cdot\text{min}^{-1}$ ,  $\lambda = 254 \text{ nm}$ ,  $t$  (major) = 9.1 min,  $t$  (minor) = 7.8 min]; <sup>1</sup>H NMR (400 MHz, CDCl<sub>3</sub>)  $\delta$  1.82 (s, 3H), 4.65 (d,  $J = 5.9 \text{ Hz}$ , 1H), 5.68 (s, 1H), 5.78 (s, 2H), 6.33 (s, 1H), 6.49 (d,  $J = 15.9 \text{ Hz}$ , 1H), 6.66 (s, 1H), 6.80 (dd,  $J = 6.0, 15.9 \text{ Hz}$ , 1H), 6.97-7.04 (m, 1H), 7.08 (d,  $J = 6.3 \text{ Hz}$ , 2H), 7.18 (t,  $J = 7.3 \text{ Hz}$ , 1H), 7.23-7.29 (m, 5H), 7.35-7.45 (m, 5H); <sup>13</sup>C NMR (100 MHz, CDCl<sub>3</sub>)  $\delta$  12.8, 44.9, 78.6, 101.2, 107.2, 108.3, 113.0 (d,  $J = 23.1 \text{ Hz}$ ), 114.1 (d,  $J = 21.2 \text{ Hz}$ ), 120.3, 121.4, 121.7, 121.8, 126.6, 127.3, 128.2, 128.5, 128.7, 129.5, 129.7, 129.9, 130.3 (d,  $J = 8.5 \text{ Hz}$ ), 131.8, 133.2 (d,  $J = 8.6 \text{ Hz}$ ), 137.3, 138.7, 144.0, 145.8 (d,  $J = 2.6 \text{ Hz}$ ), 146.4, 147.7 (d,  $J = 5.3 \text{ Hz}$ ), 163.1 (d,  $J = 245.4 \text{ Hz}$ ); HRMS (ESI)  $m/z$  calcd. for C<sub>34</sub>H<sub>26</sub>FO<sub>4</sub> [M+H]<sup>+</sup>: 517.1810, found: 517.1807.

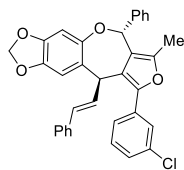

**(6R,10S)-7-(3-chlorophenyl)-6,9-diphenyl-10-((E)-styryl)-6H,10H-[1,3]dioxolo [4',5':4,5] benzo[1,2-b] furo[3,4-e] oxepine (3ja)**

According to general procedure 1: White solid, m.p. = 98-100 °C; 42 mg, 79% yield; 93% ee;  $[\alpha]_{\text{D}}^{20.0} = -12.1$  (0.1, CH<sub>2</sub>Cl<sub>2</sub>); [Daicel Chiralpak IA-3 (0.45 cm×25 cm), *n*-hexane/2-propanol = 97/3,  $v = 1.0 \text{ mL}\cdot\text{min}^{-1}$ ,  $\lambda = 254 \text{ nm}$ ,  $t$  (major) = 8.3 min,  $t$  (minor) = 7.7 min]; <sup>1</sup>H NMR (400 MHz, CDCl<sub>3</sub>)  $\delta$  1.81 (s, 3H), 4.61 (d,  $J = 6.0 \text{ Hz}$ , 1H), 5.67 (s, 1H), 5.78 (s, 2H), 6.34 (s, 1H), 6.51 (d,  $J = 15.9 \text{ Hz}$ , 1H), 6.65 (s, 1H), 6.83 (dd,  $J = 6.4, 15.9 \text{ Hz}$ , 1H), 7.08 (d,  $J = 6.5 \text{ Hz}$ , 2H), 7.18 (t,  $J = 7.3 \text{ Hz}$ , 1H), 7.23-7.31 (m, 6H), 7.35 (d,  $J = 7.8 \text{ Hz}$ , 1H), 7.39 (d,  $J = 7.9 \text{ Hz}$ , 2H), 7.52 (d,  $J = 7.7 \text{ Hz}$ , 1H), 7.68 (t,  $J = 1.8 \text{ Hz}$ , 1H); <sup>13</sup>C NMR (100 MHz, CDCl<sub>3</sub>)  $\delta$  12.8, 45.1, 78.6, 101.3, 107.2, 108.2, 120.3, 121.6, 124.2, 126.3, 126.6, 127.2, 127.3, 128.2, 128.5, 128.7, 129.5, 129.8, 129.9, 130.0, 131.8, 132.9, 134.8, 137.3, 138.7, 144.1, 145.6, 146.4, 147.6, 147.8; HRMS (ESI)  $m/z$  calcd. for C<sub>34</sub>H<sub>26</sub>ClO<sub>4</sub> [M+H]<sup>+</sup>: 533.1514, found: 533.1511.

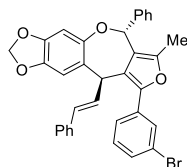

**(6R,10S)-9-(3-bromophenyl)-7-methyl-6-phenyl-10-((E)-styryl)-6H,10H-[1,3]dioxolo [4',5':4,5] benzo[1,2-b] furo[3,4-e] oxepine (3ka)**

According to general procedure 1: Yellow solid, m.p. = 84-86 °C; 36 mg, 62% yield; 93% ee;  $[\alpha]_{\text{D}}^{20.0} = -3.5$  (0.1, CH<sub>2</sub>Cl<sub>2</sub>); [Daicel Chiralpak IA-3 (0.45 cm ×25 cm), *n*-hexane/2-propanol = 97/3,  $v = 1.0 \text{ mL}\cdot\text{min}^{-1}$ ,  $\lambda = 254 \text{ nm}$ ,  $t$  (major) = 8.5 min,  $t$  (minor) = 8.1 min]; <sup>1</sup>H NMR (400 MHz, CDCl<sub>3</sub>)  $\delta$  1.82 (s, 3H), 4.59 (d,  $J = 6.4 \text{ Hz}$ , 1H), 5.67 (s, 1H), 5.79 (s, 2H), 6.34 (s, 1H), 6.52 (d,  $J = 15.9 \text{ Hz}$ , 1H), 6.65 (s, 1H), 6.84 (dd,  $J = 6.5, 15.9 \text{ Hz}$ , 1H), 7.08 (d,  $J = 6.5 \text{ Hz}$ , 2H), 7.19 (t,  $J = 7.3 \text{ Hz}$ , 1H), 7.23-7.33 (m, 6H), 7.40 (d,  $J = 7.6 \text{ Hz}$ , 2H), 7.44 (d,  $J = 7.8 \text{ Hz}$ , 1H), 7.56 (d,  $J = 7.8 \text{ Hz}$ , 1H), 7.84 (s, 1H); <sup>13</sup>C NMR (100 MHz, CDCl<sub>3</sub>)  $\delta$  12.8, 45.1, 78.7, 101.3, 107.2, 108.2, 120.2, 121.7, 122.9,

124.6, 126.6, 127.3, 128.2, 128.5, 128.8, 129.2, 129.5, 129.9, 130.0, 130.1, 130.3, 131.7, 133.2, 137.3, 138.7, 144.1, 145.4, 146.4, 147.5, 147.8; HRMS (ESI)  $m/z$  calcd. for  $C_{34}H_{26}BrO_4$   $[M+H]^+$ : 577.1009, found: 577.1014.

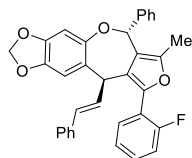

**(6R,10S)-9-(2-fluorophenyl)-7-methyl-6-phenyl-10-((E)-styryl)-6H,10H-[1,3]dioxolo [4',5':4,5] benzo[1,2-b]furo[3,4-e]oxepine (3la)**

According to general procedure 1: White solid, m.p. = 80-82 °C; 34 mg, 65% yield; 92% ee;  $[\alpha]_D^{20.0} = -5.8$  (0.1,  $CH_2Cl_2$ ); [Daicel Chiralpak IA-3 (0.45 cm×25 cm), *n*-hexane/2-propanol = 97/3,  $v = 1.0 \text{ mL}\cdot\text{min}^{-1}$ ,  $\lambda = 254 \text{ nm}$ ,  $t$  (major) = 11.3 min,  $t$  (minor) = 7.8 min];  $^1H$  NMR (400 MHz,  $CDCl_3$ )  $\delta$  1.79 (s, 3H), 4.51 (d,  $J = 6.3 \text{ Hz}$ , 1H), 5.74 (s, 1H), 5.80 (s, 2H), 6.30 (s, 1H), 6.32 (d,  $J = 15.8 \text{ Hz}$ , 1H), 6.67 (s, 1H), 6.79 (dd,  $J = 6.4, 15.8 \text{ Hz}$ , 1H), 7.09-7.21 (m, 4H), 7.21-7.26 (m, 2H), 7.26-7.30 (m, 3H), 7.30-7.39 (m, 4H), 7.54 (t,  $J = 7.6 \text{ Hz}$ , 1H);  $^{13}C$  NMR (100 MHz,  $CDCl_3$ )  $\delta$  12.9, 44.4, 78.5, 101.2, 107.0, 108.2, 116.3 (d,  $J = 22.0 \text{ Hz}$ ), 119.2 (d,  $J = 14.3 \text{ Hz}$ ), 119.4, 123.1, 124.3 (d,  $J = 3.0 \text{ Hz}$ ), 126.5, 127.1, 128.2, 128.4, 128.7, 129.3, 129.4, 129.9 (d,  $J = 8.3 \text{ Hz}$ ), 130.0, 130.8 (d,  $J = 3.0 \text{ Hz}$ ), 132.5, 137.5, 138.9, 141.7, 143.9, 146.3, 147.7, 148.2, 159.6 (d,  $J = 249.7 \text{ Hz}$ ); HRMS (ESI)  $m/z$  calcd. for  $C_{34}H_{26}FO_4$   $[M+H]^+$ : 517.1810, found: 517.1808.

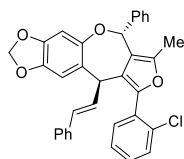

**(6R,10S)-9-(2-chlorophenyl)-7-methyl-6-phenyl-10-((E)-styryl)-6H,10H-[1,3]dioxolo [4',5':4,5] benzo[1,2-b] furo[3,4-e] oxepine (3ma)**

According to general procedure 1: White solid, m.p. = 106-108 °C; 28 mg, 52% yield; 90% ee;  $[\alpha]_D^{20.0} = -6.7$  (0.1,  $CH_2Cl_2$ ); [Daicel Chiralpak IA-3 (0.45 cm ×25 cm), *n*-hexane/2-propanol = 97/3,  $v = 1.0 \text{ mL}\cdot\text{min}^{-1}$ ,  $\lambda = 254 \text{ nm}$ ,  $t$  (major) = 13.3 min,  $t$  (minor) = 7.8 min];  $^1H$  NMR (400 MHz,  $CDCl_3$ )  $\delta$  1.82 (s, 3H), 4.41 (d,  $J = 6.9 \text{ Hz}$ , 1H), 5.75-5.84 (m, 3H), 6.22 (d,  $J = 15.8 \text{ Hz}$ , 1H), 6.34 (s, 1H), 6.66 (s, 1H), 6.70 (dd,  $J = 6.9,$

15.8 Hz, 1H), 7.15 (t,  $J = 6.0$  Hz, 3H), 7.19-7.31 (m, 7H), 7.32-7.39 (m, 2H), 7.45-7.53 (m, 2H);  $^{13}\text{C}$  NMR (100 MHz,  $\text{CDCl}_3$ )  $\delta$  12.7, 44.4, 78.6, 101.2, 107.0, 108.2, 118.9, 122.7, 126.4, 126.7, 127.1, 128.3, 128.4, 128.7, 129.2, 129.3, 129.9, 130.1, 130.2, 130.3, 132.3, 132.4, 134.7, 137.5, 139.0, 143.9, 144.3, 146.3, 147.4, 147.9; HRMS (ESI)  $m/z$  calcd. for  $\text{C}_{34}\text{H}_{26}\text{ClO}_4$   $[\text{M}+\text{H}]^+$ : 533.1514, found: 533.1504.

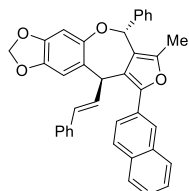

**(6R,10S)-7-methyl-9-(naphthalen-2-yl)-6-phenyl-10-((E)-styryl)-6H,10H-[1,3]dioxolo[4',5':4,5]benzo[1,2-b]furo[3,4-e]oxepine (3na)**

According to general procedure 1: White solid, m.p. = 118-120 °C; 52 mg, 95% yield; 93% ee;  $[\alpha]_{\text{D}}^{20.0} = -6.8$  (0.1,  $\text{CH}_2\text{Cl}_2$ ); [Daicel Chiralpak IA-3 (0.45 cm $\times$ 25 cm), *n*-hexane/2-propanol = 90/10,  $v = 1.0$  mL $\cdot$ min $^{-1}$ ,  $\lambda = 254$  nm,  $t$  (major) = 6.8 min,  $t$  (minor) = 5.8 min];  $^1\text{H}$  NMR (400 MHz,  $\text{CDCl}_3$ )  $\delta$  1.85 (s, 3H), 4.75 (d,  $J = 6.1$  Hz, 1H), 5.69 (s, 1H), 5.77 (s, 2H), 6.38 (s, 1H), 6.60 (d,  $J = 16.0$  Hz, 1H), 6.63 (s, 1H), 6.92 (dd,  $J = 6.3, 16.0$  Hz, 1H), 7.12 (d,  $J = 6.0$  Hz, 2H), 7.19 (t,  $J = 7.3$  Hz, 1H), 7.23-7.33 (m, 5H), 7.43 (d,  $J = 7.5$  Hz, 2H), 7.46-7.52 (m, 2H), 7.81 (dd,  $J = 1.7$  Hz, 8.6, 1H), 7.83-7.88 (m, 2H), 7.91 (d,  $J = 8.6$  Hz, 1H), 8.11 (s, 1H);  $^{13}\text{C}$  NMR (100 MHz,  $\text{CDCl}_3$ )  $\delta$  12.9, 45.2, 78.8, 101.2, 107.2, 108.2, 120.1, 121.0, 124.6, 125.1, 126.1, 126.4, 126.5, 126.6, 127.3, 127.8, 128.2, 128.3, 128.4, 128.5, 128.7, 129.5, 129.8, 130.3, 132.3, 132.6, 133.5, 137.5, 138.8, 144.0, 146.3, 147.1, 147.4, 147.6; HRMS (ESI)  $m/z$  calcd. for  $\text{C}_{38}\text{H}_{29}\text{O}_4$   $[\text{M}+\text{H}]^+$ : 549.2060, found: 549.2051.

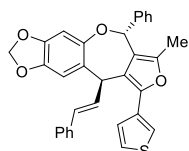

**(6R,10S)-7-methyl-6-phenyl-10-((E)-styryl)-9-(thiophen-3-yl)-6H,10H-[1,3]dioxolo[4',5':4,5]benzo[1,2-b]furo[3,4-e]oxepine (3oa)**

According to general procedure 1: White solid, m.p. = 110-112 °C; 46 mg, 91% yield; 90% ee;  $[\alpha]_{\text{D}}^{20.0} = -20.6$  (0.1,  $\text{CH}_2\text{Cl}_2$ ); [Daicel Chiralpak IA-3 (0.45 cm $\times$ 25 cm), *n*-



hexane/2-propanol = 97/3,  $\nu = 1.0 \text{ mL} \cdot \text{min}^{-1}$ ,  $\lambda = 254 \text{ nm}$ ,  $t$  (major) = 14.5 min,  $t$  (minor) = 9.1 min];  $^1\text{H NMR}$  (400 MHz,  $\text{CDCl}_3$ )  $\delta$  1.82 (s, 3H), 4.66 (d,  $J = 6.0 \text{ Hz}$ , 1H), 5.68 (s, 1H), 5.78 (s, 2H), 6.33 (s, 1H), 6.46 (d,  $J = 15.9 \text{ Hz}$ , 1H), 6.67 (s, 1H), 6.77 (dd,  $J = 6.1, 15.9 \text{ Hz}$ , 1H), 7.08 (d,  $J = 6.2 \text{ Hz}$ , 2H), 7.16 (t,  $J = 7.3 \text{ Hz}$ , 1H), 7.22-7.29 (m, 5H), 7.34-7.41 (m, 3H), 7.43 (d,  $J = 5.0$ , 1H), 7.47 (d,  $J = 3.0 \text{ Hz}$ , 1H);  $^{13}\text{C NMR}$  (100 MHz,  $\text{CDCl}_3$ )  $\delta$  12.7, 44.9, 78.6, 100.0, 101.2, 107.2, 108.3, 119.7, 119.8, 120.2, 126.0, 126.1, 126.5, 127.2, 128.2, 128.5, 128.7, 129.4, 129.5, 130.0, 132.0, 132.2, 137.3, 138.8, 143.9, 144.0, 146.3, 147.7; HRMS (ESI)  $m/z$  calcd. for  $\text{C}_{32}\text{H}_{25}\text{O}_4\text{S}$   $[\text{M}+\text{H}]^+$ : 505.1468, found: 505.1466.

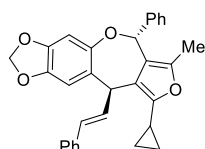

**(6R,10S)-9-cyclopropyl-7-methyl-6-phenyl-10-((E)-styryl)-6H,10H-[1,3]dioxolo[4',5':4,5]benzo[1,2-b]furo[3,4-e]oxepine (3pa)**

According to general procedure 1: White solid, m.p. = 82-84 °C; 34 mg, 73% yield; 86% ee;  $[\alpha]_{\text{D}}^{20.0} = 12.1$  (0.1,  $\text{CH}_2\text{Cl}_2$ ); [Daicel Chiralpak IA-3 (0.45 cm  $\times$  25 cm), *n*-hexane/2-propanol = 97/3,  $\nu = 1.0 \text{ mL} \cdot \text{min}^{-1}$ ,  $\lambda = 254 \text{ nm}$ ,  $t$  (major) = 12.3 min,  $t$  (minor) = 7.8 min];  $^1\text{H NMR}$  (400 MHz,  $\text{CDCl}_3$ )  $\delta$  0.84-0.94 (m, 4H), 1.68 (s, 3H), 1.88-1.97 (m, 1H), 4.54 (d,  $J = 7.2 \text{ Hz}$ , 1H), 5.73 (s, 1H), 5.79 (s, 1H), 5.80 (s, 1H), 6.24 (s, 1H), 6.39 (d,  $J = 15.8 \text{ Hz}$ , 1H), 6.73 (s, 1H), 6.77 ( $J = 6.3, 15.9 \text{ Hz}$ , 1H), 7.08 (d,  $J = 6.0 \text{ Hz}$ , 2H), 7.16 (t,  $J = 7.3 \text{ Hz}$ , 1H), 7.20-7.28 (m, 5H), 7.35 (d,  $J = 7.4 \text{ Hz}$ , 2H);  $^{13}\text{C NMR}$  (100 MHz,  $\text{CDCl}_3$ )  $\delta$  6.0, 6.1, 7.2, 12.5, 44.7, 78.7, 101.2, 107.2, 108.2, 118.5, 119.3, 126.4, 127.1, 128.1, 128.4, 128.5, 128.6, 129.4, 130.2, 132.6, 137.6, 139.1, 143.9, 144.1, 146.2, 147.9, 148.4; HRMS (ESI)  $m/z$  calcd. for  $\text{C}_{31}\text{H}_{27}\text{O}_4$   $[\text{M}+\text{H}]^+$ : 463.1904, found: 463.1901.

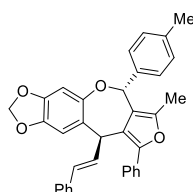

**(6R,10S)-7-methyl-9-phenyl-10-((E)-styryl)-6-(p-tolyl)-6H,10H [1,3]dioxolo[4',5':4,5]benzo[1,2-b]furo[3,4-e]oxepine**

### [4',5':4,5] benzo [1,2-b] furo[3,4-e] oxepine (3qa)

According to general procedure 1: White solid, m.p. = 90-92 °C; 40 mg, 78% yield; 90% ee;  $[\alpha]_{\text{D}}^{20.0} = -12.2$  (0.1, CH<sub>2</sub>Cl<sub>2</sub>); [Daicel Chiralpak IA-3 (0.45 cm × 25 cm), *n*-hexane/2-propanol = 97/3,  $v = 1.0 \text{ mL} \cdot \text{min}^{-1}$ ,  $\lambda = 254 \text{ nm}$ ,  $t$  (major) = 9.6 min,  $t$  (minor) = 8.0 min]; <sup>1</sup>H NMR (400 MHz, CDCl<sub>3</sub>)  $\delta$  1.80 (s, 3H), 2.32 (s, 3H), 4.66 (d,  $J = 5.7 \text{ Hz}$ , 1H), 5.71 (s, 1H), 5.77 (s, 1H), 5.78 (s, 1H), 6.30 (s, 1H), 6.48 (d,  $J = 15.9 \text{ Hz}$ , 1H), 6.64 (s, 1H), 6.82 (d,  $J = 5.7 \text{ Hz}$ , 15.9 Hz, 1H), 6.97 (d,  $J = 7.2 \text{ Hz}$ , 2H), 7.05 (d,  $J = 7.8 \text{ Hz}$ , 2H), 7.16 (t,  $J = 7.3 \text{ Hz}$ , 1H), 7.22-7.28 (m, 2H), 7.31 (d,  $J = 7.5 \text{ Hz}$ , 1H), 7.38 (d,  $J = 7.7 \text{ Hz}$ , 2H), 7.43 (t,  $J = 7.6 \text{ Hz}$ , 2H), 7.65 (d,  $J = 7.7 \text{ Hz}$ , 2H); <sup>13</sup>C NMR (100 MHz, CDCl<sub>3</sub>)  $\delta$  12.9, 21.3, 44.8, 78.5, 101.2, 107.3, 108.2, 120.1, 120.4, 126.3, 126.5, 127.2, 127.3, 128.5, 128.7, 128.9, 129.4, 129.5, 130.3, 131.3, 132.2, 135.9, 137.5, 138.3, 143.9, 146.3, 146.9, 147.1, 147.7; HRMS (ESI)  $m/z$  calcd. for C<sub>35</sub>H<sub>29</sub>O<sub>4</sub> [M+H]<sup>+</sup>: 513.2060, found: 513.2055.

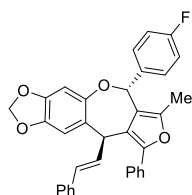

### (6R,10S)-6-(4-fluorophenyl)-7-methyl-9-phenyl-10-((E)-styryl)-6H,10H-[1,3]dioxolo [4',5':4,5] benzo[1,2-b] furo[3,4-e] oxepine (3ra)

According to general procedure 1: White solid, m.p. = 80-82 °C; 49 mg, 95% yield; 90% ee;  $[\alpha]_{\text{D}}^{20.0} = -12.2$  (0.1, CH<sub>2</sub>Cl<sub>2</sub>); [Daicel Chiralpak IA-3 (0.45 cm × 25 cm), *n*-hexane/2-propanol = 97/3,  $v = 1.0 \text{ mL} \cdot \text{min}^{-1}$ ,  $\lambda = 254 \text{ nm}$ ,  $t$  (major) = 12.7 min,  $t$  (minor) = 9.0 min]; <sup>1</sup>H NMR (400 MHz, CDCl<sub>3</sub>)  $\delta$  1.82 (s, 3H), 4.66 (d,  $J = 5.8 \text{ Hz}$ , 1H), 5.68 (s, 1H), 5.79 (s, 2H), 6.32 (s, 1H), 6.48 (d,  $J = 15.9 \text{ Hz}$ , 1H), 6.65 (s, 1H), 6.80 (dd,  $J = 5.9, 15.9 \text{ Hz}$ , 1H), 6.95 (t,  $J = 8.5 \text{ Hz}$ , 2H), 7.07 (t,  $J = 6.5 \text{ Hz}$ , 2H), 7.17 (t,  $J = 7.3 \text{ Hz}$ , 1H), 7.22-7.29 (m, 2H), 7.32 (t,  $J = 7.4 \text{ Hz}$ , 1H), 7.38 (d,  $J = 7.6 \text{ Hz}$ , 2H), 7.44 (t,  $J = 7.6 \text{ Hz}$ , 2H), 7.65 (d,  $J = 7.7 \text{ Hz}$ , 2H); <sup>13</sup>C NMR (100 MHz, CDCl<sub>3</sub>)  $\delta$  12.8, 44.7, 77.9, 101.3, 107.1, 108.3, 115.1 (d,  $J = 21.4 \text{ Hz}$ ), 119.9, 120.2, 126.3, 126.5, 127.3 (d,  $J = 13.3 \text{ Hz}$ ), 128.5, 128.8, 129.6, 130.3, 131.1, 131.2, 131.3, 132.1, 135.0 (d,  $J = 3.2 \text{ Hz}$ ),

137.4, 144.1, 146.4, 147.0, 147.1, 147.4, 162.8 (d,  $J = 247.7$  Hz); HRMS (ESI)  $m/z$  calcd. for  $C_{34}H_{26}FO_4$   $[M+H]^+$ : 517.1810, found: 517.1806.

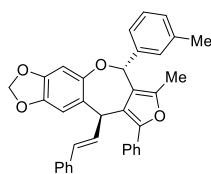

**(6R,10S)-7-methyl-9-phenyl-10-((E)-styryl)-6-(m-tolyl)-6H,10H-[1,3]dioxolo [4',5':4,5] benzo[1,2-b] furo[3,4-e] oxepine (3sa)**

According to general procedure 1: White solid, m.p. = 92-94 °C; 30 mg, 59% yield; 90% ee;  $[\alpha]_D^{20.0} = -18.9$  (0.1,  $CH_2Cl_2$ ); [Daicel Chiralpak IA-3 (0.45 cm×25 cm), *n*-hexane/2-propanol = 95/5,  $v = 1.0$  mL·min<sup>-1</sup>,  $\lambda = 254$  nm, t (major) = 7.1 min, t (minor) = 5.9 min]; <sup>1</sup>H NMR (400 MHz,  $CDCl_3$ )  $\delta$  1.82 (s, 3H), 2.29 (s, 3H), 4.67 (d,  $J = 5.9$  Hz, 1H), 5.70 (s, 1H), 5.78 (s, 2H), 6.29 (s, 1H), 6.48 (d,  $J = 15.8$  Hz, 1H), 6.65 (s, 1H), 6.86-6.79 (m, 2H), 6.96 (s, 1H), 7.07-7.22 (m, 3H), 7.26 (t,  $J = 8.3$  Hz, 2H) 7.31 (t,  $J = 7.5$  Hz, 1H), 7.38 (d,  $J = 7.7$  Hz, 2H), 7.44 (t,  $J = 7.6$  Hz, 2H), 7.66 (d,  $J = 7.8$  Hz, 2H); <sup>13</sup>C NMR (100 MHz,  $CDCl_3$ )  $\delta$  12.9, 21.5, 44.8, 78.8, 101.2, 107.2, 108.3, 120.0, 120.4, 126.3, 126.5, 126.6, 127.2, 127.3, 128.0, 128.5, 128.8, 129.4, 129.5, 130.1, 130.2, 131.3, 132.3, 137.5, 137.7, 138.8, 143.9, 146.3, 146.9, 147.2, 147.8; HRMS (ESI)  $m/z$  calcd. for  $C_{35}H_{29}O_4$   $[M+H]^+$ : 513.2060, found: 513.2056.

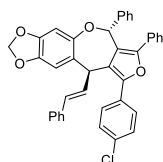

**(6R,10S)-9-(4-chlorophenyl)-6,7-diphenyl-10-((E)-styryl)-6H,10H-[1,3]dioxolo [4',5':4,5] benzo[1,2-b] furo[3,4-e] oxepine (3ta)**

According to general procedure 1: White solid, m.p. = 230-232 °C; 45 mg, 75% yield; 93% ee;  $[\alpha]_D^{20.0} = -25.8$  (0.1,  $CH_2Cl_2$ ); [Daicel Chiralpak IA-3 (0.45 cm×25 cm), *n*-hexane/2-propanol = 95/5,  $v = 1.0$  mL·min<sup>-1</sup>,  $\lambda = 254$  nm, t (major) = 10.5 min, t (minor) = 7.7 min]; <sup>1</sup>H NMR (400 MHz,  $CDCl_3$ )  $\delta$  4.69 (d,  $J = 5.9$  Hz, 1H), 5.69 (s, 1H), 5.75 (s, 1H), 5.76 (s, 1H), 6.45 (d,  $J = 15.9$  Hz, 1H), 6.66 (s, 1H), 6.71 (s, 1H), 6.78 (dd,  $J = 6.0, 15.9$  Hz, 1H), 7.09-7.22 (m, 9H), 7.22-7.29 (m, 2H), 7.37 (dd,  $J = 2.4, 8.2$  Hz, 4H),

7.46 (d,  $J = 8.5$  Hz, 2H), 7.73 (d,  $J = 8.5$  Hz, 2H);  $^{13}\text{C}$  NMR (100 MHz,  $\text{CDCl}_3$ )  $\delta$  44.9, 79.3, 101.2, 107.1, 107.9, 122.0, 122.2, 125.5, 126.6, 127.3, 127.4, 128.0, 128.3, 128.4, 128.5, 128.7, 129.1, 129.4, 129.5, 129.6, 129.7, 130.4, 132.1, 133.7, 137.2, 138.5, 144.1, 146.5, 147.2, 147.4, 148.2; HRMS (ESI)  $m/z$  calcd. for  $\text{C}_{39}\text{H}_{28}\text{ClO}_4$   $[\text{M}+\text{H}]^+$ : 595.1671, found: 595.1666.

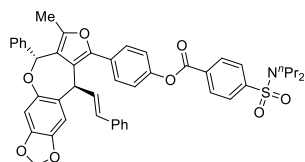

**4-((6R,10S)-7-methyl-6-phenyl-10-((E)-styryl)-6H,10H-[1,3]dioxolo[4',5':4,5]benzo[1,2-b]furo[3,4-e]oxepin-9-yl)phenyl-4-(N,N-dipropylsulfamoyl)benzoate (3ua)**

According to general procedure 1: White solid, m.p. = 108-110 °C; 61 mg, 78% yield; 94% ee;  $[\alpha]_{\text{D}}^{20.0} = 11.8$  (0.1,  $\text{CH}_2\text{Cl}_2$ ); [Daicel Chiralpak IA-3 (0.45 cm  $\times$  25 cm), *n*-hexane/2-propanol = 80/20,  $v = 1.0$  mL $\cdot$ min $^{-1}$ ,  $\lambda = 254$  nm,  $t$  (major) = 16.6 min,  $t$  (minor) = 13.1 min];  $^1\text{H}$  NMR (400 MHz,  $\text{CDCl}_3$ )  $\delta$  0.89 (t,  $J = 7.4$  Hz, 6H), 1.56-1.61 (m, 4H), 1.83 (s, 3H), 3.14 (t,  $J = 7.4$  Hz, 4H), 4.65 (d,  $J = 5.9$  Hz, 1H), 5.68 (s, 1H), 5.80 (s, 2H), 6.35 (s, 1H), 6.50 (d,  $J = 15.9$  Hz, 1H), 6.68 (s, 1H), 6.82 (dd,  $J = 5.9, 15.9$  Hz, 1H), 7.10 (d,  $J = 6.8$  Hz, 2H), 7.18 (t,  $J = 7.3$  Hz, 1H), 7.25-7.33 (m, 7H), 7.39 (d,  $J = 7.7$  Hz, 2H), 7.73 (d,  $J = 8.3$  Hz, 2H), 7.96 (d,  $J = 8.1$  Hz, 2H), 8.35 (d,  $J = 8.1$  Hz, 2H);  $^{13}\text{C}$  NMR (100 MHz,  $\text{CDCl}_3$ )  $\delta$  11.3, 12.9, 22.0, 44.8, 50.0, 78.7, 101.2, 107.2, 108.2, 120.1, 120.7, 121.9, 126.5, 127.2, 127.3, 127.5, 128.2, 128.5, 128.7, 129.5, 129.6, 130.0, 130.9, 132.0, 132.2, 132.8, 137.3, 138.7, 144.0, 145.1, 146.2, 146.4, 147.4, 147.6, 149.7, 164.0; HRMS (ESI)  $m/z$  calcd. for  $\text{C}_{47}\text{H}_{44}\text{NO}_8\text{S}$   $[\text{M}+\text{H}]^+$ : 782.2782, found: 782.2789.

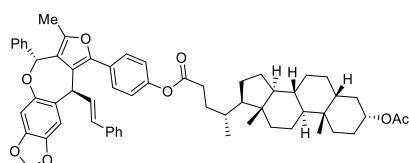

**4-((6R,10S)-7-methyl-6-phenyl-10-((E)-styryl)-6H,10H [1,3] dioxolo[4',5':4,5]benzo[1,2-b] furo [3,4-e] oxepin-9-yl) phenyl-(R)-4-((3R,5R,8R,9S,10S,13R,14S,17R)-3-acetoxy-10,13-dimethylhexadecahydro-1H-cyclopenta[a]phenanthren-17-**

### yl) pentanoate (3va)

According to general procedure 1: White solid, m.p. = 122-124 °C; 60 mg, 66% yield; 93% ee;  $[\alpha]_{\text{D}}^{20.0} = 14.3$  (0.1, CH<sub>2</sub>Cl<sub>2</sub>); [Daicel Chiralpak IA-3 (0.45 cm×25 cm), *n*-hexane/2-propanol = 90/10,  $v = 1.0 \text{ mL} \cdot \text{min}^{-1}$ ,  $\lambda = 254 \text{ nm}$ ,  $t$  (major) = 14.5 min,  $t$  (minor) = 9.2 min]; <sup>1</sup>H NMR (400 MHz, CDCl<sub>3</sub>)  $\delta$  0.68 (s, 3H), 0.93 (s, 3H), 1.00 (d,  $J = 6.1 \text{ Hz}$ , 3H), 1.05-1.20 (m, 5H), 1.21-1.36 (m, 5H), 1.34-1.52 (m, 8H), 1.69 (d,  $J = 10.1 \text{ Hz}$ , 2H), 1.81 (s, 3H), 1.82-2.01 (m, 6H), 2.03 (s, 3H), 2.46-2.55 (m, 1H), 2.59-2.68 (m, 1H), 4.62 (d,  $J = 6.0 \text{ Hz}$ , 1H), 4.71-4.73 (m, 1H), 5.67 (s, 1H), 5.79 (s, 2H), 6.33 (s, 1H), 6.48 (d,  $J = 15.8 \text{ Hz}$ , 1H), 6.66 (s, 1H), 6.81 (dd,  $J = 6.8, 15.9 \text{ Hz}$ , 1H), 7.09 (d,  $J = 6.8 \text{ Hz}$ , 2H), 7.14-7.21 (m, 3H), 7.23-7.30 (m, 5H), 7.38 (d,  $J = 7.6 \text{ Hz}$ , 2H), 7.65 (d,  $J = 8.5 \text{ Hz}$ , 2H); <sup>13</sup>C NMR (100 MHz, CDCl<sub>3</sub>)  $\delta$  12.2, 12.8, 18.4, 20.9, 21.6, 23.4, 24.3, 26.4, 26.7, 27.1, 28.4, 31.1, 31.6, 32.4, 34.7, 35.1, 35.5, 35.9, 40.3, 40.5, 42.0, 42.9, 44.8, 56.1, 56.6, 74.5, 78.7, 101.2, 107.2, 108.2, 120.0, 120.4, 121.9, 126.5, 127.3, 127.4, 128.2, 128.5, 128.7, 128.9, 129.5, 129.6, 130.1, 132.1, 137.3, 138.8, 144.0, 146.3, 146.4, 147.2, 147.6, 149.9, 170.7, 172.8; HRMS (ESI)  $m/z$  calcd. for C<sub>60</sub>H<sub>67</sub>O<sub>8</sub> [M+H]<sup>+</sup>: 915.4831, found: 915.4827.

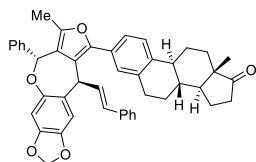

### **(8R,9S,13S,14S)-13-methyl-1-((6R,10S)-7-methyl-6-phenyl-10-((E)-styryl)-6H,10H-[1,3] dioxolo[4',5':4,5]benzo[1,2-b]furo[3,4-e]oxepin-9-yl)-6,7,8,9,11,12,13,14,15,16-dwecahydro-17H-cyclopenta[a]phenanthren-17-one (3wa)**

According to general procedure 1: White solid, m.p. = 258-260 °C; 55 mg, 82% yield; 89% ee;  $[\alpha]_{\text{D}}^{20.0} = 54.3$  (0.1, CH<sub>2</sub>Cl<sub>2</sub>); [Daicel Chiralpak IA-3 (0.45 cm×25 cm), *n*-hexane/2-propanol = 95/5,  $v = 1.0 \text{ mL} \cdot \text{min}^{-1}$ ,  $\lambda = 254 \text{ nm}$ ,  $t$  (major) = 12.1 min,  $t$  (minor) = 10.5 min]; <sup>1</sup>H NMR (400 MHz, CDCl<sub>3</sub>)  $\delta$  0.93 (s, 3H), 1.44-1.59 (m, 4H), 1.61-1.69 (m, 2H), 1.80 (s, 3H), 1.97-2.11 (m, 3H), 2.17 (t,  $J = 8.9 \text{ Hz}$ , 1H), 2.31-2.40 (m, 1H), 2.42-2.56 (m, 2H), 2.88-3.10 (m, 2H), 4.65 (d,  $J = 6.0 \text{ Hz}$ , 1H), 5.68 (s, 1H), 5.77 (s, 2H), 6.34 (s, 1H), 6.50 (d,  $J = 15.9 \text{ Hz}$ , 1H), 6.64 (s, 1H), 6.85 (dd,  $J = 6.3, 15.9 \text{ Hz}$ ,

1H), 7.09 (d,  $J = 6.3$  Hz, 2H), 7.17 (t,  $J = 7.3$  Hz, 1H) 7.26 (t,  $J = 7.2$  Hz, 5H), 7.37 (t,  $J = 8.7$  Hz, 3H), 7.40-7.46 (m, 2H);  $^{13}\text{C}$  NMR (100 MHz,  $\text{CDCl}_3$ )  $\delta$  12.8, 13.9, 21.7, 25.8, 26.6, 29.5, 31.7, 35.9, 38.2, 44.5, 45.0, 48.0, 50.6, 78.7, 101.2, 107.1, 108.2, 119.8, 120.0, 123.8, 125.7, 126.5, 126.9, 127.2, 128.1, 128.5, 128.6, 128.9, 129.4, 129.5, 130.3, 132.4, 136.8, 137.4, 138.9, 139.0, 143.9, 146.2, 146.8, 147.0, 147.6, 220.8; HRMS (ESI)  $m/z$  calcd. for  $\text{C}_{46}\text{H}_{43}\text{O}_5$   $[\text{M}+\text{H}]^+$ : 675.3105, found: 675.3114.

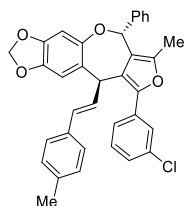

**(6R,10S)-9-(3-chlorophenyl)-7-methyl-10-((E)-4-methylstyryl)-6-phenyl-6H,10H-[1,3] dioxolo[4',5':4,5]benzo[1,2-b]furo[3,4-e]oxepine (3jb)**

According to general procedure 1: White solid, m.p. = 190-192 °C; 41 mg, 75% yield; 90% ee;  $[\alpha]_{\text{D}}^{20.0} = -3.5$  (0.1,  $\text{CH}_2\text{Cl}_2$ ); [Daicel Chiralpak IA-3 (0.45 cm $\times$ 25 cm), *n*-hexane/2-propanol = 98/2,  $v = 1.0$  mL $\cdot$ min $^{-1}$ ,  $\lambda = 254$  nm,  $t$  (major) = 11.1 min,  $t$  (minor) = 11.6 min];  $^1\text{H}$  NMR (400 MHz,  $\text{CDCl}_3$ )  $\delta$  1.81 (s, 3H), 2.30 (s, 3H), 4.59 (d,  $J = 6.3$  Hz, 1H), 5.67 (s, 1H), 5.78 (s, 2H), 6.34 (s, 1H), 6.48 (d,  $J = 15.9$  Hz, 1H), 6.65 (s, 1H), 6.77 (dd,  $J = 6.5, 15.9$  Hz, 1H), 7.08 (d,  $J = 7.6$  Hz, 4H), 7.23-7.31 (m, 6H), 7.35 (t,  $J = 7.9$  Hz, 1H), 7.52 (d,  $J = 7.6$  Hz, 1H), 7.68 (s, 1H);  $^{13}\text{C}$  NMR (100 MHz,  $\text{CDCl}_3$ )  $\delta$  12.8, 21.2, 45.1, 78.6, 101.2, 107.1, 108.2, 120.3, 121.7, 124.2, 126.3, 126.5, 127.2, 128.2, 128.7, 129.2, 129.4, 129.7, 130.0, 130.1, 130.7, 132.9, 134.5, 134.7, 137.1, 138.7, 144.0, 145.5, 146.4, 147.5, 147.7; HRMS (ESI)  $m/z$  calcd. for  $\text{C}_{35}\text{H}_{28}\text{ClO}_4$   $[\text{M}+\text{H}]^+$ : 547.1671, found: 547.1671.

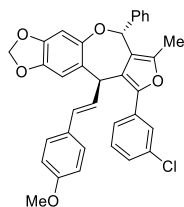

**(6R,10S)-9-(3-chlorophenyl)-10-((E)-4-methoxystyryl)-7-methyl-6-phenyl-6H,10H-[1,3] dioxolo[4',5':4,5]benzo[1,2-b]furo[3,4-e]oxepine (3jc)**

According to general procedure 1: White solid, m.p. = 80-82 °C; 38 mg, 68% yield;

97% ee;  $[\alpha]_D^{20.0} = -5.1$  (0.1, CH<sub>2</sub>Cl<sub>2</sub>); [Daicel Chiralpak IA-3 (0.45 cm×25 cm), *n*-hexane/2-propanol = 99/1,  $v = 1.0 \text{ mL}\cdot\text{min}^{-1}$ ,  $\lambda = 254 \text{ nm}$ ,  $t$  (major) = 29.6 min,  $t$  (minor) = 33.3 min]; <sup>1</sup>H NMR (400 MHz, CDCl<sub>3</sub>)  $\delta$  1.81 (s, 3H), 3.78 (s, 3H), 4.59 (d,  $J = 6.3$  Hz, 1H), 5.67 (s, 1H), 5.78 (s, 2H), 6.34 (s, 1H), 6.45 (d,  $J = 15.8$  Hz, 1H), 6.65 (s, 1H), 6.69 (dd,  $J = 6.4, 15.9$  Hz, 1H), 6.81 (d,  $J = 8.5$  Hz, 2H), 7.08 (d,  $J = 6.2$  Hz, 2H), 7.21-7.30 (m, 4H), 7.29-7.39 (m, 3H), 7.52 (d,  $J = 7.7$  Hz, 1H), 7.68 (s, 1H); <sup>13</sup>C NMR (100 MHz, CDCl<sub>3</sub>)  $\delta$  12.8, 45.1, 55.4, 78.6, 101.2, 107.2, 108.2, 114.0, 120.3, 121.8, 124.2, 126.3, 127.1, 127.7, 128.2, 128.7, 129.3, 129.4, 129.6, 130.0, 130.1, 130.2, 132.9, 134.7, 138.7, 144.0, 145.5, 146.3, 147.5, 147.7, 159.1; HRMS (ESI)  $m/z$  calcd. for C<sub>35</sub>H<sub>28</sub>ClO<sub>5</sub> [M+H]<sup>+</sup>: 563.1620, found: 563.1620.

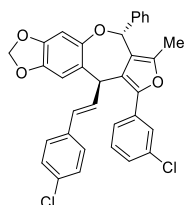

**(6R,10S)-9-(3-chlorophenyl)-10-((E)-4-chlorostyryl)-7-methyl-6-phenyl-6H,10H-[1,3] dioxolo[4',5':4,5]benzo[1,2-b]furo[3,4-e]oxepine (3jd)**

According to general procedure 1: White solid, m.p. = 90-92 °C; 32 mg, 57% yield; 95% ee;  $[\alpha]_D^{20.0} = -1.8$  (0.1, CH<sub>2</sub>Cl<sub>2</sub>); [Daicel Chiralpak IA-3 (0.45 cm×25 cm), *n*-hexane/2-propanol = 98/2,  $v = 1.0 \text{ mL}\cdot\text{min}^{-1}$ ,  $\lambda = 254 \text{ nm}$ ,  $t$  (major) = 10.3 min,  $t$  (minor) = 10.8 min]; <sup>1</sup>H NMR (400 MHz, CDCl<sub>3</sub>)  $\delta$  1.82 (s, 3H), 4.60 (d,  $J = 6.1$  Hz, 1H), 5.67 (s, 1H), 5.79 (s, 2H), 6.33 (s, 1H), 6.45 (d,  $J = 15.9$  Hz, 1H), 6.65 (s, 1H), 6.80 (dd,  $J = 6.4, 15.9$  Hz, 1H), 7.02-7.13 (m, 2H), 7.21-7.34 (m, 8H), 7.37 (t,  $J = 7.8$  Hz, 1H), 7.50 (d,  $J = 7.7$  Hz, 1H), 7.66 (s, 1H); <sup>13</sup>C NMR (100 MHz, CDCl<sub>3</sub>)  $\delta$  12.8, 45.0, 78.7, 101.3, 107.2, 108.2, 120.2, 121.4, 124.1, 126.3, 127.3, 127.8, 128.2, 128.6, 128.7, 128.8, 129.5, 129.7, 130.0, 132.5, 132.8, 132.9, 134.7, 135.8, 138.6, 144.1, 145.6, 146.5, 147.5, 147.8; HRMS (ESI)  $m/z$  calcd. for C<sub>34</sub>H<sub>25</sub>Cl<sub>2</sub>O<sub>4</sub> [M+H]<sup>+</sup>: 567.1124, found: 567.1126.

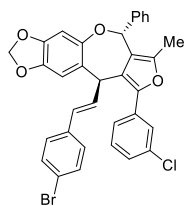

**(6R,10S)-10-((E)-4-bromostyryl)-9-(3-chlorophenyl)-7-methyl-6-phenyl-6H,10H-[1,3] dioxolo[4',5':4,5]benzo[1,2-b]furo[3,4-e]oxepine**

**[1,3] dioxolo- [4',5':4,5] benzo[1,2-b] furo[3,4-e] oxepine (3je)**

According to general procedure 1: White solid, m.p. = 98-100 °C; 46 mg, 75% yield; 95% ee;  $[\alpha]_{\text{D}}^{20.0} = -8.8$  (0.1, CH<sub>2</sub>Cl<sub>2</sub>); [Daicel Chiralpak IA-3 (0.45 cm×25 cm), *n*-hexane/2-propanol = 97/3,  $v = 1.0 \text{ mL}\cdot\text{min}^{-1}$ ,  $\lambda = 254 \text{ nm}$ ,  $t$  (major) = 10.9 min,  $t$  (minor) = 11.8 min]; <sup>1</sup>H NMR (400 MHz, CDCl<sub>3</sub>)  $\delta$  1.82 (s, 3H), 4.59 (d,  $J = 6.3 \text{ Hz}$ , 1H), 5.67 (s, 1H), 5.78 (s, 2H), 6.33 (s, 1H), 6.44 (d,  $J = 15.9 \text{ Hz}$ , 1H), 6.64 (s, 1H), 6.81 (dd,  $J = 6.3, 15.9 \text{ Hz}$ , 1H), 7.07 (d,  $J = 7.0 \text{ Hz}$ , 2H), 7.22-7.32 (m, 6H), 7.34 -7.41 (m, 3H), 7.50 (d,  $J = 7.7 \text{ Hz}$ , 1H), 7.66 (s, 1H); <sup>13</sup>C NMR (100 MHz, CDCl<sub>3</sub>)  $\delta$  12.8, 45.0, 78.7, 101.3, 107.2, 108.2, 120.2, 121.0, 121.3, 124.1, 126.3, 127.3, 128.1, 128.2, 128.7, 128.8, 129.5, 129.7, 130.0, 131.6, 132.6, 132.8, 134.7, 136.2, 138.6, 144.1, 145.6, 146.5, 147.5, 147.8; HRMS (ESI)  $m/z$  calcd. for C<sub>34</sub>H<sub>25</sub>ClBrO<sub>4</sub> [M+H]<sup>+</sup>: 611.0619, found: 611.0617.

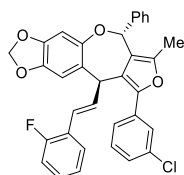

**(6R,10S)-9-(3-chlorophenyl)-10-((E)-2-fluorostyryl)-7-methyl-6-phenyl-6H,10H-[1,3] dioxolo [4',5':4,5]benzo[1,2-b]furo[3,4-e]oxepine (3jf)**

According to general procedure 1: White solid, m.p. = 154-156 °C; 42 mg, 76% yield; 84% ee;  $[\alpha]_{\text{D}}^{20.0} = 11.0$  (0.1, CH<sub>2</sub>Cl<sub>2</sub>); [Daicel Chiralpak IA-3 (0.45 cm ×25 cm), *n*-hexane/2-propanol = 90/10,  $v = 1.0 \text{ mL}\cdot\text{min}^{-1}$ ,  $\lambda = 254 \text{ nm}$ ,  $t$  (major) = 13.6 min,  $t$  (minor) = 15.4 min]; <sup>1</sup>H NMR (400 MHz, CDCl<sub>3</sub>)  $\delta$  1.81 (s, 3H), 4.63 (d,  $J = 6.4 \text{ Hz}$ , 1H), 5.67 (s, 1H), 5.78 (s, 2H), 6.34 (s, 1H), 6.66 (s, 1H), 6.70 (d,  $J = 16.1 \text{ Hz}$ , 1H), 6.92 (dd,  $J = 6.4, 16.0 \text{ Hz}$ , 1H), 6.96-7.11 (m, 4H), 7.12-7.19 (m, 1H), 7.23-7.30 (m, 4H), 7.37 (t,  $J = 7.6 \text{ Hz}$ , 1H), 7.46-7.54 (m, 2H), 7.67 (s, 1H); <sup>13</sup>C NMR (100 MHz, CDCl<sub>3</sub>)  $\delta$  12.9, 45.4, 78.7, 101.3, 107.2, 108.2, 115.7 (d,  $J = 22.2 \text{ Hz}$ ), 120.2, 121.3, 122.2 (d,  $J = 4.0 \text{ Hz}$ ), 124.0 (d,  $J = 3.5 \text{ Hz}$ ), 124.2, 125.1 (d,  $J = 12.2 \text{ Hz}$ ), 126.3, 127.3, 127.5 (d,  $J = 3.9 \text{ Hz}$ ), 128.2, 128.6 (d,  $J = 8.3 \text{ Hz}$ ), 128.8, 129.5, 129.8, 130.0, 132.8, 134.2 (d,  $J = 4.4 \text{ Hz}$ ), 134.8, 138.6, 144.1, 145.7, 146.5, 147.5, 147.8, 160.2 (d,  $J = 248.8 \text{ Hz}$ ); HRMS (ESI)  $m/z$  calcd. for C<sub>34</sub>H<sub>25</sub>ClFO<sub>4</sub> [M+H]<sup>+</sup>: 551.1420, found: 551.1424.



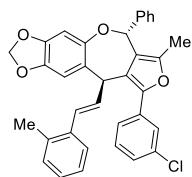

**(6R,10S)-9-(3-chlorophenyl)-7-methyl-10-((E)-2-methylstyryl)-6-phenyl-6H,10H-[1,3]dioxolo[4',5':4,5]benzo[1,2-b]furo[3,4-e]oxepine (3jg)**

According to general procedure 1: White solid, m.p. = 78-80 °C; 32 mg, 58% yield; 96% ee;  $[\alpha]_{\text{D}}^{20.0} = 5.4$  (0.1, CH<sub>2</sub>Cl<sub>2</sub>); [Daicel Chiralpak IA-3 (0.45 cm×25 cm), *n*-hexane/2-propanol = 99/1,  $v = 1.0 \text{ mL}\cdot\text{min}^{-1}$ ,  $\lambda = 254 \text{ nm}$ ,  $t$  (major) = 10.4 min,  $t$  (minor) = 9.4 min]; <sup>1</sup>H NMR (400 MHz, CDCl<sub>3</sub>)  $\delta$  1.81 (s, 3H); 2.32 (s, 3H), 4.63 (d,  $J = 5.4 \text{ Hz}$ , 1H), 5.68 (s, 1H), 5.78 (s, 2H), 6.33 (s, 1H), 6.66 (s, 1H), 6.72 (d,  $J = 5.3 \text{ Hz}$ , 1H), 6.73 (s, 1H), 7.14 -7.05 (m, 5H), 7.20-7.32 (m, 4H), 7.36 (t,  $J = 7.9 \text{ Hz}$ , 1H), 7.43-7.49 (m, 1H), 7.57 (d,  $J = 7.7 \text{ Hz}$ , 1H), 7.70 (s, 1H); <sup>13</sup>C NMR (100 MHz, CDCl<sub>3</sub>)  $\delta$  12.8, 20.0, 45.4, 78.7, 101.2, 107.2, 108.2, 120.2, 121.8, 124.2, 126.0, 126.1, 126.2, 127.2, 127.3, 127.8, 128.2, 128.7, 129.5, 130.0, 130.1, 130.2, 133.0, 133.1, 134.7, 135.4, 136.5, 138.7, 144.1, 145.5, 146.4, 147.5, 147.8; HRMS (ESI)  $m/z$  calcd. for C<sub>35</sub>H<sub>28</sub>ClO<sub>4</sub> [M+H]<sup>+</sup>: 547.1671, found: 547.1671.

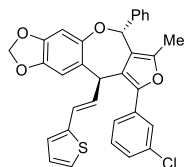

**(6R,10S)-9-(3-chlorophenyl)-7-methyl-6-phenyl-10-((E)-2-(thiophen-2-yl)vinyl)-6H,10H-[1,3]dioxolo[4',5':4,5]benzo[1,2-b]furo[3,4-e]oxepine (3jh)**

According to general procedure 1: White solid, m.p. = 160-162 °C; 41 mg, 76% yield; 94% ee;  $[\alpha]_{\text{D}}^{20.0} = 5.2$  (0.1, CH<sub>2</sub>Cl<sub>2</sub>); [Daicel Chiralpak IA-3 (0.45 cm×25 cm), *n*-hexane/2-propanol = 97/3,  $v = 1.0 \text{ mL}\cdot\text{min}^{-1}$ ,  $\lambda = 254 \text{ nm}$ ,  $t$  (major) = 9.4 min,  $t$  (minor) = 8.1 min]; <sup>1</sup>H NMR (400 MHz, CDCl<sub>3</sub>)  $\delta$  1.82 (s, 3H), 4.58 (s, 1H), 5.67 (s, 1H), 5.79 (s, 2H), 6.33 (s, 1H), 6.61 (s, 1H), 6.62 (d,  $J = 11.6 \text{ Hz}$ , 2H), 6.92 (d,  $J = 4.3 \text{ Hz}$ , 2H), 7.04 -7.14 (m, 3H), 7.23-7.33 (m, 4H), 7.37 (t,  $J = 7.9 \text{ Hz}$ , 1H), 7.50 (d,  $J = 7.8 \text{ Hz}$ , 1H), 7.65 (s, 1H); <sup>13</sup>C NMR (100 MHz, CDCl<sub>3</sub>)  $\delta$  12.9, 44.7, 78.6, 101.3, 107.2, 108.2, 120.3, 121.2, 123.1, 123.9, 124.1, 125.5, 126.3, 127.2, 127.3, 128.2, 128.8, 129.4, 129.6, 130.1,

131.4, 132.8, 134.8, 138.6, 142.4, 144.0, 145.6, 146.5, 147.6, 147.8; HRMS (ESI)  $m/z$  calcd. for  $C_{32}H_{24}ClO_4S$   $[M+H]^+$ : 539.1078, found: 539.1077.

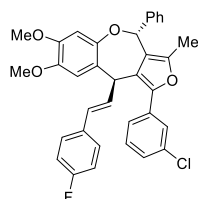

**(4R,10S)-1-(3-chlorophenyl)-10-((E)-4-fluorostyryl)-7,8-dimethoxy-3-methyl-4-phenyl-4H,10H-benzo[b]furo[3,4-e] oxepine (3ji)**

According to general procedure 1: White solid, m.p. = 80-82 °C; 41 mg, 72% yield; 94% ee;  $[\alpha]_D^{20.0} = -11.5$  (0.1,  $CH_2Cl_2$ ); [Daicel Chiralpak IA-3 (0.45 cm $\times$ 25 cm), *n*-hexane/2-propanol = 90/10,  $v = 1.0$  mL $\cdot$ min $^{-1}$ ,  $\lambda = 254$  nm, t (major) = 5.2 min, t (minor) = 11.2 min];  $^1H$  NMR (400 MHz,  $CDCl_3$ )  $\delta$  1.84 (s, 3H), 3.39 (s, 3H), 3.81 (s, 3H), 4.63 (d,  $J = 6.1$  Hz, 1H), 5.66 (s, 1H), 6.36 (s, 1H), 6.49 (d,  $J = 15.9$  Hz, 1H), 6.66 (s, 1H), 6.77 (dd,  $J = 6.2, 15.9$  Hz, 1H), 6.96 (t,  $J = 8.6$  Hz, 2H), 7.05 (d,  $J = 6.0$  Hz, 2H), 7.21-7.32 (m, 4H), 7.33-7.43 (m, 3H), 7.55 (d,  $J = 7.8$  Hz, 1H), 7.70 (s, 1H);  $^{13}C$  NMR (100 MHz,  $CDCl_3$ )  $\delta$  12.8, 44.8, 55.8, 56.2, 78.6, 109.7, 111.4, 115.4 (d,  $J = 21.5$  Hz), 120.3, 121.8, 124.1, 126.2, 127.2, 128.0 (d,  $J = 7.9$  Hz), 128.1, 128.2, 128.6 (d,  $J = 4.5$  Hz), 129.4, 130.0, 131.6, 131.7, 133.0, 133.4 (d,  $J = 3.3$  Hz), 134.7, 138.9, 145.5, 145.6, 146.6, 147.7, 147.9, 162.2 (d,  $J = 246.4$  Hz); HRMS (ESI)  $m/z$  calcd. for  $C_{35}H_{29}ClFO_4$   $[M+H]^+$ : 567.1733, found: 567.1734.

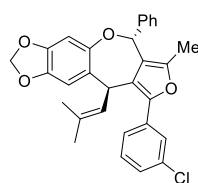

**(6R,10S)-9-(3-chlorophenyl)-7-methyl-10-(2-methylprop-1-en-1-yl)-6-phenyl-6H,10H-[1,3] dioxolo[4',5':4,5]benzo[1,2-b]furo[3,4-e]oxepine (3jm)**

According to general procedure 1: Yellow oil, 25 mg, 52% yield; 73% ee;  $[\alpha]_D^{20.0} = -18.5$  (0.1,  $CH_2Cl_2$ ); [Daicel Chiralpak IA-3 (0.45 cm $\times$ 25 cm), *n*-hexane/2-propanol = 98/2,  $v = 1.0$  mL $\cdot$ min $^{-1}$ ,  $\lambda = 254$  nm, t (major) = 5.9 min, t (minor) = 5.0 min];  $^1H$  NMR (400 MHz,  $CDCl_3$ )  $\delta$  1.76 (s, 3H), 1.80 (s, 3H), 1.84 (s, 3H), 4.60 (d,  $J = 9.3$  Hz, 1H), 5.64 (s, 1H), 5.76 (s, 2H), 6.10 (d,  $J = 9.2$  Hz, 1H), 6.35 (s, 1H), 6.59 (s, 1H), 7.07 (d,

$J = 7.0$  Hz, 2H), 7.22-7.29 (m, 4H), 7.36 (t,  $J = 7.8$  Hz, 1H), 7.44 (d,  $J = 7.7$  Hz, 1H), 7.52 (s, 1H);  $^{13}\text{C}$  NMR (100 MHz,  $\text{CDCl}_3$ )  $\delta$  12.8, 18.1, 26.0, 40.7, 78.8, 101.1, 107.3, 107.8, 120.1, 123.6, 124.4, 126.5, 126.6, 127.0, 128.2, 128.7, 129.6, 129.9, 131.2, 131.7, 133.1, 134.6, 138.7, 143.8, 145.1, 145.8, 147.0, 147.6; HRMS (ESI)  $m/z$  calcd. for  $\text{C}_{30}\text{H}_{26}\text{ClO}_4$   $[\text{M}+\text{H}]^+$ : 485.1952, found: 485.1959.

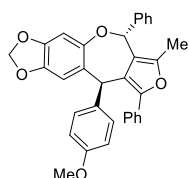

**(6R,10S)-10-(4-methoxyphenyl)-7-methyl-6,9-diphenyl-6H,10H- [1,3]-dioxolo [4',5':4,5] benzo[1,2-b] furo[3,4-e] oxepine (3aj)**

According to general procedure 2: White solid, m.p. = 158-160 °C; 38 mg, 76% yield; 92% ee;  $[\alpha]_{\text{D}}^{20.0} = -78.3$  (0.1,  $\text{CH}_2\text{Cl}_2$ ); [Daicel Chiralpak IA-3 (0.45 cm $\times$ 25 cm), *n*-hexane/2-propanol = 95/5,  $v = 1.0$  mL $\cdot$ min $^{-1}$ ,  $\lambda = 254$  nm,  $t$  (major) = 10.6 min,  $t$  (minor) = 7.1 min];  $^1\text{H}$  NMR (400 MHz,  $\text{CDCl}_3$ )  $\delta$  1.82 (s, 3H), 3.77 (s, 3H), 5.12 (s, 1H), 5.59 (s, 1H), 5.79 (s, 1H), 5.80 (s, 1H), 6.25 (s, 1H), 6.78 (s, 1H), 6.83 (d,  $J = 8.6$  Hz, 2H), 7.07 (d,  $J = 5.6$  Hz, 2H), 7.20 (d,  $J = 8.5$  Hz, 2H), 7.23 -7.31 (m, 4H), 7.36 (t,  $J = 7.6$  Hz, 2H), 7.49 (d,  $J = 7.6$  Hz, 2H);  $^{13}\text{C}$  NMR (100 MHz,  $\text{CDCl}_3$ )  $\delta$  13.0, 45.1, 55.2, 78.7, 101.2, 107.6, 109.0, 113.7, 120.0, 120.5, 126.0, 127.2, 128.1, 128.2, 128.6, 128.8, 129.5, 131.2, 131.9, 135.9, 138.8, 143.8, 146.2, 147.0, 147.3, 147.4, 157.9; HRMS (ESI)  $m/z$  calcd. for  $\text{C}_{33}\text{H}_{27}\text{O}_5$   $[\text{M}+\text{H}]^+$ : 503.1853, found: 503.1852.

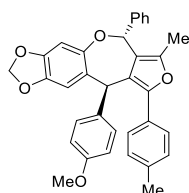

**(6R,10S)-10-(4-methoxyphenyl)-7-methyl-6-phenyl-9-(p-tolyl)-6H,10H-[1,3] dioxolo[4',5':4,5]benzo[1,2-b]furo[3,4-e]oxepine (3bj)**

According to general procedure 2: White solid, m.p. = 200-202 °C; 30 mg, 58% yield; 88% ee;  $[\alpha]_{\text{D}}^{20.0} = -188.7$  (0.1,  $\text{CH}_2\text{Cl}_2$ ); [Daicel Chiralpak IA-3 (0.45 cm  $\times$  25 cm), *n*-

hexane/2-propanol = 95/5,  $v = 1.0 \text{ mL} \cdot \text{min}^{-1}$ ,  $\lambda = 254 \text{ nm}$ ,  $t$  (major) = 10.8 min,  $t$  (minor) = 6.8 min];  $^1\text{H NMR}$  (400 MHz,  $\text{CDCl}_3$ )  $\delta$  1.80 (s, 3H), 2.36 (s, 3H), 3.77 (s, 3H), 5.09 (s, 1H), 5.58 (s, 1H), 5.80 (s, 1H), 5.81 (s, 1H), 6.24 (s, 1H), 6.77 (s, 1H), 6.83 (d,  $J = 8.5 \text{ Hz}$ , 2H), 7.07 (d,  $J = 4.0 \text{ Hz}$ , 2H), 7.18 (dd,  $J = 4.2, 8.3 \text{ Hz}$ , 4H), 7.20-7.26 (m, 2H), 7.26-7.31 (m, 1H), 7.38 (d,  $J = 7.9 \text{ Hz}$ , 2H);  $^{13}\text{C NMR}$  (100 MHz,  $\text{CDCl}_3$ )  $\delta$  13.0, 21.3, 45.1, 55.2, 78.7, 101.2, 107.6, 109.0, 113.7, 119.8, 119.9, 126.0, 128.1, 128.2, 128.4, 128.6, 129.4, 129.5, 132.0, 136.0, 137.1, 138.9, 143.7, 146.2, 147.0, 147.1, 147.4, 157.9; HRMS (ESI)  $m/z$  calcd. for  $\text{C}_{34}\text{H}_{27}\text{O}_5$   $[\text{M}-\text{H}]^+$ : 515.1853, found: 515.1850.

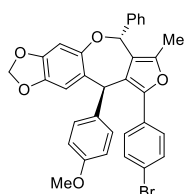

**(6R,10S)-9-(4-bromophenyl)-10-(4-methoxyphenyl)-7-methyl-6-phenyl-6H,10H-[1,3]dioxolo[4',5':4,5]benzo[1,2-b]furo[3,4-e]oxepine (3ej)**

According to general procedure 2: White solid, m.p. = 104-106 °C; 36 mg, 62% yield; 90% ee;  $[\alpha]_{\text{D}}^{20.0} = -58.2$  (0.1,  $\text{CH}_2\text{Cl}_2$ ); [Daicel Chiralpak IA-3 (0.45 cm  $\times$  25 cm), *n*-hexane/2-propanol = 95/5,  $v = 1.0 \text{ mL} \cdot \text{min}^{-1}$ ,  $\lambda = 254 \text{ nm}$ ,  $t$  (major) = 12.1 min,  $t$  (minor) = 7.5 min];  $^1\text{H NMR}$  (400 MHz,  $\text{CDCl}_3$ )  $\delta$  1.81 (s, 3H), 3.78 (s, 3H), 5.04 (s, 1H), 5.58 (s, 1H), 5.81 (s, 2H), 6.25 (s, 1H), 6.77 (s, 1H), 6.83 (d,  $J = 8.4 \text{ Hz}$ , 2H), 7.06 (d,  $J = 7.1 \text{ Hz}$ , 2H), 7.17 (d,  $J = 8.3 \text{ Hz}$ , 2H), 7.22-7.26 (m, 2H), 7.26-7.29 (m, 1H), 7.34 (d,  $J = 8.3 \text{ Hz}$ , 2H), 7.49 (d,  $J = 8.3 \text{ Hz}$ , 2H);  $^{13}\text{C NMR}$  (100 MHz,  $\text{CDCl}_3$ )  $\delta$  13.0, 45.3, 55.3, 78.6, 101.2, 107.7, 108.9, 113.8, 120.3, 121.2, 126.3, 127.4, 128.2, 128.7, 129.5, 130.0, 131.4, 131.7, 131.9, 135.5, 138.6, 143.8, 146.2, 146.3, 147.0, 147.8, 158.0; HRMS (ESI)  $m/z$  calcd. for  $\text{C}_{33}\text{H}_{26}\text{BrO}_5$   $[\text{M}+\text{H}]^+$ : 581.0958, found: 581.0962.

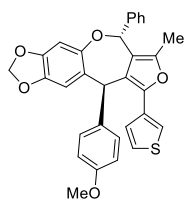

**(6R,10S)-10-(4-methoxyphenyl)-7-methyl-6-phenyl-9-(thiophen-3-yl)-6H,10H-[1,3] dioxolo[4',5':4,5]benzo[1,2-b]furo[3,4-e]oxepine (3oj)**

According to general procedure 2: White solid, m.p. =150-152 °C; 31 mg, 62% yield; 90% ee;  $[\alpha]_{\text{D}}^{20.0} = -123.1$  (0.1, CH<sub>2</sub>Cl<sub>2</sub>); [Daicel Chiralpak IA-3 (0.45 cm×25 cm), *n*-hexane/2-propanol = 95/5,  $v = 1.0 \text{ mL}\cdot\text{min}^{-1}$ ,  $\lambda = 254 \text{ nm}$ ,  $t$  (major) = 13.7 min,  $t$  (minor) = 7.8min]; <sup>1</sup>H NMR (400 MHz, CDCl<sub>3</sub>)  $\delta$  1.82 (s, 3H), 3.75 (s, 3H), 5.10 (s, 1H), 5.60 (s, 1H), 5.79 (s, 1H), 5.80 (s, 1H), 6.25 (s, 1H), 6.80 (s, 2H), 6.83 (s, 1H), 7.06 (d,  $J = 7.2 \text{ Hz}$ , 2H), 7.18 (d,  $J = 8.4 \text{ Hz}$ , 2H), 7.21-7.28 (m, 4H), 7.30 (d,  $J = 5.1 \text{ Hz}$ , 1H), 7.34 (dd,  $J = 2.9, 5.1 \text{ Hz}$ , 1H); <sup>13</sup>C NMR (100 MHz, CDCl<sub>3</sub>)  $\delta$  12.9, 45.2, 55.3, 78.6, 101.2, 107.7, 109.0, 113.8, 119.8, 119.9, 125.8, 126.1, 128.1, 128.2, 128.3, 128.7, 129.5, 131.5, 132.1, 135.6, 138.7, 143.8, 144.5, 146.3, 146.6, 147.1, 158.0; HRMS (ESI)  $m/z$  calcd. for C<sub>31</sub>H<sub>25</sub>O<sub>5</sub>S [M+H]<sup>+</sup>: 509.1417, found: 509.1421.

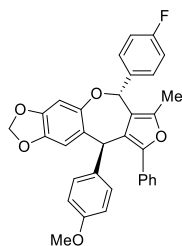

**(6R,10S)-6-(4-fluorophenyl)-10-(4-methoxyphenyl)-7-methyl-9-phenyl-6H,10H-[1,3] dioxolo[4',5':4,5] benzo[1,2-b]furo[3,4-e]oxepine (3rj)**

According to general procedure 2: White solid, m.p. = 168-170 °C; 37 mg, 72% yield; 89% ee;  $[\alpha]_{\text{D}}^{20.0} = -59.6$  (0.1, CH<sub>2</sub>Cl<sub>2</sub>); [Daicel Chiralpak IA-3 (0.45 cm × 25 cm), *n*-hexane/2-propanol = 95/5,  $v = 1.0 \text{ mL}\cdot\text{min}^{-1}$ ,  $\lambda = 254 \text{ nm}$ ,  $t$  (major) = 14.7 min,  $t$  (minor) = 8.2 min]; <sup>1</sup>H NMR (400 MHz, CDCl<sub>3</sub>)  $\delta$  1.83 (s, 3H), 3.77 (s, 3H), 5.11 (s, 1H), 5.59 (s, 1H), 5.82 (s, 1H), 5.83 (s, 1H), 6.24 (s, 1H), 6.78 (s, 1H), 6.83 (d,  $J = 8.7 \text{ Hz}$ , 2H), 6.94 (t,  $J = 8.5 \text{ Hz}$ , 2H), 7.05 (s, 2H), 7.18 (d,  $J = 8.5 \text{ Hz}$ , 2H), 7.28 (t,  $J = 7.6 \text{ Hz}$ , 1H), 7.37 (t,  $J = 7.6 \text{ Hz}$ , 2H), 7.48 (d,  $J = 7.5 \text{ Hz}$ , 2H); <sup>13</sup>C NMR (100 MHz, CDCl<sub>3</sub>)  $\delta$  13.0, 45.1, 55.3, 77.8, 101.3, 107.6, 109.1, 113.7, 115.1 (d,  $J = 21.4 \text{ Hz}$ ), 119.9, 120.3, 126.0, 127.3, 128.2, 128.8, 131.1, 131.3 (d,  $J = 8.4 \text{ Hz}$ ), 132.1, 134.9 (d,  $J = 3.2 \text{ Hz}$ ), 135.8,

143.9, 146.3, 146.7, 147.3, 147.4, 158.0, 162.8 (d,  $J = 247.3$  Hz); HRMS (ESI)  $m/z$  calcd. for  $C_{33}H_{26}FO_5$   $[M+H]^+$ : 521.1759, found: 521.1757.

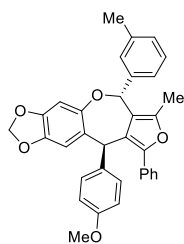

**(6R,10S)-10-(4-methoxyphenyl)-7-methyl-9-phenyl-6-(m-tolyl)-6H,10H-[1,3]dioxolo [4',5':4,5]benzo[1,2-b] furo [3,4-e] oxepine (3sj)**

According to general procedure 2: White solid, m.p. = 86-87 °C; 37 mg, 72% yield; 84% ee;  $[\alpha]_D^{20.0} = -51.9$  (0.1,  $CH_2Cl_2$ ); [Daicel Chiralpak IA-3 (0.45 cm  $\times$  25 cm), *n*-hexane/2-propanol = 95/5,  $v = 1.0$  mL  $\cdot$  min $^{-1}$ ,  $\lambda = 254$  nm,  $t$  (major) = 9.7 min,  $t$  (minor) = 6.7 min];  $^1H$  NMR (400 MHz,  $CDCl_3$ )  $\delta$  1.82 (s, 3H), 2.28 (s, 3H), 3.77 (s, 3H), 5.12 (s, 1H), 5.61 (s, 1H), 5.79 (s, 1H), 5.81 (s, 1H), 6.20 (s, 1H), 6.78 (s, 1H), 6.83 (d,  $J = 8.6$  Hz, 2H), 6.92 (s, 1H), 7.09 (t,  $J = 7.6$  Hz, 2H), 7.20 (d,  $J = 8.4$  Hz, 2H), 7.23-7.31 (m, 2H), 7.37 (t,  $J = 7.6$  Hz, 2H), 7.50 (d,  $J = 7.8$  Hz, 2H);  $^{13}C$  NMR (100 MHz,  $CDCl_3$ )  $\delta$  13.1, 21.5, 45.1, 55.3, 78.7, 101.2, 107.7, 109.0, 113.7, 120.1, 120.5, 126.0, 126.6, 127.2, 127.9, 128.2, 128.8, 129.4, 130.2, 131.2, 131.9, 135.9, 137.7, 138.7, 143.7, 146.2, 147.1, 147.2, 147.4, 157.9; HRMS (ESI)  $m/z$  calcd. for  $C_{34}H_{29}O_5$   $[M+H]^+$ : 517.2010, found: 517.2007.

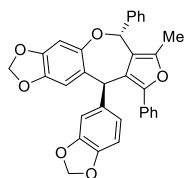

**(6R,10S)-10-(benzo[d][1,3]dioxol-5-yl)-7-methyl-6,9-diphenyl-6H,10H-[1,3]dioxolo [4',5':4,5]benzo[1,2-b] furo[3,4-e] oxepine (3ak)**

**Dioxolo [4',5':4,5] benzo[1,2-b] furo[3,4-e] oxepine (3ak)**

According to general procedure 2: White solid, m.p. = 82-84 °C; 31 mg, 61% yield; 90% ee;  $[\alpha]_D^{20.0} = -95.1$  (0.1,  $CH_2Cl_2$ ); [Daicel Chiralpak IA-3 (0.45 cm  $\times$  25 cm), *n*-

hexane/2-propanol = 95/5,  $v = 1.0 \text{ mL} \cdot \text{min}^{-1}$ ,  $\lambda = 254 \text{ nm}$ ,  $t$  (major) = 8.8 min,  $t$  (minor) = 7.3 min];  $^1\text{H NMR}$  (400 MHz,  $\text{CDCl}_3$ )  $\delta$  1.81 (s, 3H), 5.07 (s, 1H), 5.59 (s, 1H), 5.81 (s, 2H), 5.91 (s, 1H), 5.93 (s, 1H), 6.25 (s, 1H), 6.73-6.80 (m, 4H), 7.08 (s, 2H), 7.22-7.32 (m, 4H), 7.38 (t,  $J = 7.6 \text{ Hz}$ , 2H), 7.49 (d,  $J = 7.5 \text{ Hz}$ , 2H);  $^{13}\text{C NMR}$  (100 MHz,  $\text{CDCl}_3$ )  $\delta$  13.0, 45.5, 78.7, 101.0, 101.2, 107.7, 108.0, 108.1, 109.0, 119.9, 120.2, 120.3, 126.0, 127.3, 128.2, 128.7, 128.8, 129.5, 131.1, 131.8, 137.9, 138.7, 143.8, 145.9, 146.3, 147.0, 147.4, 147.5, 147.7; HRMS (ESI)  $m/z$  calcd. for  $\text{C}_{33}\text{H}_{25}\text{O}_6$   $[\text{M}+\text{H}]^+$ : 517.1646, found: 517.1651.

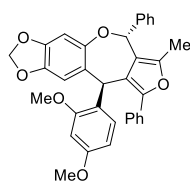

**(6R,10S)-10-(2,4-dimethoxyphenyl)-7-methyl-6,9-diphenyl-6H,10H-[1,3]dioxolo[4',5':4,5]benzo[1,2-b]furo[3,4-e]oxepine (3a)**

According to general procedure 2: White solid, m.p. = 82-84 °C; 37 mg, 70% yield; 80% ee;  $[\alpha]_{\text{D}}^{20.0} = -73.2$  (0.1,  $\text{CH}_2\text{Cl}_2$ ); [Daicel Chiralpak IA-3 (0.45 cm  $\times$  25 cm), *n*-hexane/2-propanol = 95/5,  $v = 1.0 \text{ mL} \cdot \text{min}^{-1}$ ,  $\lambda = 254 \text{ nm}$ ,  $t$  (major) = 6.5 min,  $t$  (minor) = 16.6 min];  $^1\text{H NMR}$  (400 MHz,  $\text{CDCl}_3$ )  $\delta$  1.88 (s, 3H), 3.78 (s, 3H), 3.83 (s, 3H), 5.43 (s, 1H), 5.51 (s, 1H), 5.74 (s, 2H), 6.45-6.51 (m, 3H), 6.86 (s, 1H), 7.10 (d,  $J = 5.2 \text{ Hz}$ , 2H), 7.21-7.28 (m, 4H), 7.30-7.39 (m, 4H), 7.55 (d,  $J = 8.4 \text{ Hz}$ , 1H);  $^{13}\text{C NMR}$  (100 MHz,  $\text{CDCl}_3$ )  $\delta$  12.9, 39.9, 55.4, 55.5, 78.7, 98.7, 100.9, 104.0, 106.9, 110.0, 121.0, 121.3, 124.8, 125.9, 126.9, 128.1, 128.5, 128.6, 129.7, 130.8, 131.2, 138.8, 139.5, 143.3, 145.6, 146.6, 146.7, 147.3, 157.3, 159.5; HRMS (ESI)  $m/z$  calcd. for  $\text{C}_{34}\text{H}_{29}\text{O}_6$   $[\text{M}+\text{H}]^+$ : 533.1959, found: 533.1959.

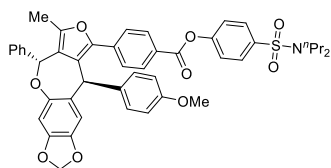

#### 4-(*N,N*-dipropylsulfamoyl)phenyl-4-((6*R*,10*S*)-10-(4-methoxyphenyl)-7-methyl-6-phenyl-6*H*,10*H*-[1,3]dioxolo[4',5':4,5]benzo[1,2-*b*]furo[3,4-*e*]oxepin-9-yl) benzoate (**3uj**)

According to general procedure 2: White solid, m.p. = 102-104 °C; 56 mg, 71% yield; 86% ee;  $[\alpha]_D^{20.0} = -73.0$  (0.1, CH<sub>2</sub>Cl<sub>2</sub>); [Daicel Chiralpak IA-3 (0.45 cm × 25 cm), *n*-hexane/2-propanol = 95/5,  $v = 1.0 \text{ mL} \cdot \text{min}^{-1}$ ,  $\lambda = 254 \text{ nm}$ ,  $t$  (major) = 21.8 min,  $t$  (minor) = 16.5 min]; <sup>1</sup>H NMR (400 MHz, CDCl<sub>3</sub>)  $\delta$  0.89 (t,  $J = 7.3 \text{ Hz}$ , 6H), 1.55-1.60 (m, 4H), 1.83 (s, 3H), 3.14 (t,  $J = 7.3 \text{ Hz}$ , 4H), 3.78 (s, 3H), 5.11 (s, 1H), 5.59 (s, 1H), 5.82 (s, 2H), 6.27 (s, 1H), 6.81 (s, 1H), 6.84 (d,  $J = 8.5 \text{ Hz}$ , 2H), 7.08 (s, 2H), 7.19-7.30 (m, 7H), 7.55 (d,  $J = 8.4 \text{ Hz}$ , 2H), 7.95 (d,  $J = 8.2 \text{ Hz}$ , 2H), 8.33 (d,  $J = 8.2 \text{ Hz}$ , 2H); <sup>13</sup>C NMR (100 MHz, CDCl<sub>3</sub>)  $\delta$  11.3, 13.0, 22.0, 45.2, 50.0, 55.3, 78.6, 101.2, 107.7, 109.0, 113.8, 120.2, 120.8, 121.9, 127.2, 127.3, 128.1, 128.2, 128.7, 129.4, 129.5, 130.9, 131.8, 132.8, 135.7, 138.7, 143.8, 145.1, 146.3, 146.4, 147.0, 147.7, 149.7, 158.0, 163.9; HRMS (ESI)  $m/z$  calcd. for C<sub>46</sub>H<sub>44</sub>NO<sub>9</sub>S [M+H]<sup>+</sup>: 786.2731, found: 786.2727.

#### 4. Large-scale reaction and synthetic transformations

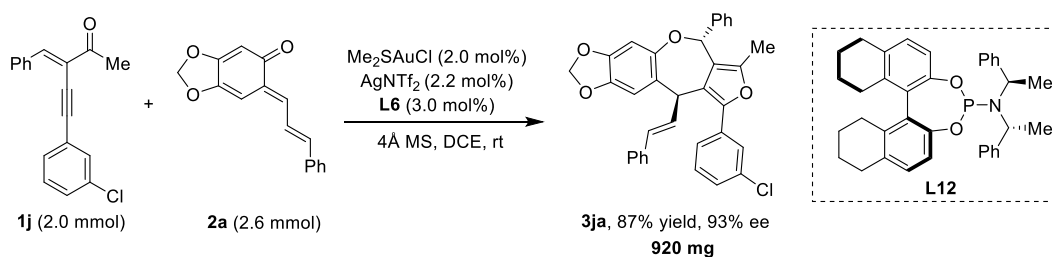

Under nitrogen atmosphere, a solution of **L12** (0.06 mmol, 33.4 mg, 3.0 mol%) and Me<sub>2</sub>SAuCl (0.04 mmol, 11.8 mg, 2.0 mol%) in DCE (2.0 mL) was stirred at room temperature for 2 h, then the solvent was removed in vacuum. Next, the AgNTf<sub>2</sub> (0.044 mmol, 17.0 mg, 2.2 mol%) was added to the residue and DCE (10 mL) was added, and the mixture was stirred at room temperature for 15 min. Then the precipitate was removed and the remaining solution was transferred into a solution of ketone substrate **1j** (2.0 mmol, 560 mg, 1.0 equiv.) and *ortho* quinone methides **2a** (2.6 mmol, 654 mg



1.3 equiv.) with 4 Å molecular sieves 6 g in DCE (10 mL) at room temperature. Once the reaction was complete as indicated by TLC, the solvent was removed under reduced pressure, and the residue was purified by a silica gel column using ethyl acetate/petroleum ether=1/60 as the eluent to give aim product **3ja** as white solid. (920 mg, 1.72 mmol) with 87% yield and 93% ee. [Daicel CHIRALPAK® IA-3 (0.45 cm × 25 cm), *n*-hexane/2-propanol = 97/3,  $v = 1.0 \text{ mL} \cdot \text{min}^{-1}$ ,  $\lambda = 254 \text{ nm}$ ,  $t(\text{major}) = 8.7 \text{ min}$ ,  $t(\text{minor}) = 8.1 \text{ min}$ ].

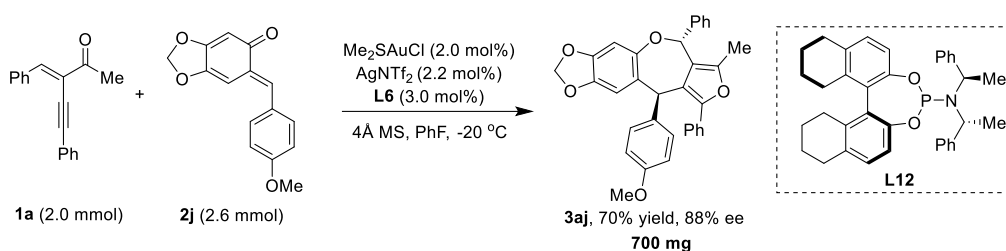

Under nitrogen atmosphere, a solution of **L12** (0.06 mmol, 33.4 mg, 3.0 mol%) and  $\text{Me}_2\text{SAuCl}$  (0.04 mmol, 11.8 mg, 2.0 mol%) in DCE (2.0 mL) was stirred at room temperature for 2 h, then the solvent was removed in vacuum. Next, the  $\text{AgNTf}_2$  (0.044 mmol, 17.0 mg, 2.2 mol%) was added to the residue and PhF (10 mL) was added, and the mixture was stirred at room temperature for 15 min. Then the precipitate was removed and the remaining solution was transferred into a solution of ketone substrate **1a** (2.0 mmol, 492 mg, 1.0 equiv.) and *ortho* quinone methides **2j** (2.6 mmol, 664 mg 1.3 equiv.) with 4 Å molecular sieves 6 g in PhF (10 mL) at room temperature. Once the raw materials were used up, the solvent was removed under reduced pressure, and the residue was purified by a silica gel column using ethyl acetate/petroleum ether=1/40 as the eluent to give aim product **3aj** as white solid. (700 mg, 1.4 mmol) with 70% yield and 88% ee. [Daicel CHIRALPAK® IA-3 (0.45 cm × 25 cm), *n*-hexane/2-propanol = 95/5,  $v = 1.0 \text{ mL} \cdot \text{min}^{-1}$ ,  $\lambda = 254 \text{ nm}$ ,  $t(\text{major}) = 11.2 \text{ min}$ ,  $t(\text{minor}) = 7.2 \text{ min}$ ].

## Synthetic procedures for chemical transformations:

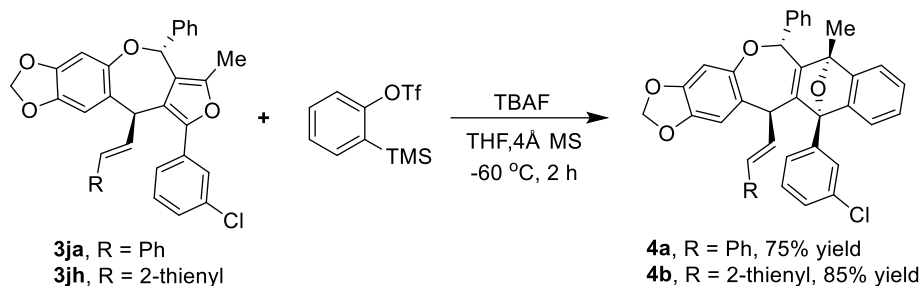

TBAF (0.6 mL, 0.1 mol/L in THF) was slowly added dropwise to a stirred solution of 4 Å MS (60 mg), chiral product (0.1 mmol) and the triflate (0.6 mmol) in dry THF (2.0 mL) at -60 °C under nitrogen. After stirring for 2 h, the solution was quenched with saturated ammonium chloride and extracted with ethyl acetate. The combined organic phase was dried over Na<sub>2</sub>SO<sub>4</sub> and concentrated in vacuum. The residue was purified by flash chromatography on silica gel with PE/EA=1/30 to afford product 4.

**(6R,7R,12S,13S)-12-(3-chlorophenyl)-7-methyl-6-phenyl-13-((E)-styryl)-6,7,12,13-tetrahydro-7,12-epoxy[1,3]dioxolo[4',5':4,5]benzo[1,2-b]naphtho[2,3-e]oxepine (4a)**

White solid, m.p. = 78-80 °C; 46 mg, 75% yield;  $[\alpha]_D^{20.0} = -26.9$  (0.1, CH<sub>2</sub>Cl<sub>2</sub>); <sup>1</sup>H NMR (400 MHz, CDCl<sub>3</sub>) δ 1.42 (s, 3H), 4.03 (s, 1H), 5.56 (s, 1H), 5.62 (s, 1H), 5.73 (s, 1H), 5.76 (s, 1H), 5.95 (s, 1H), 5.96 (s, 1H), 6.46 (s, 1H), 6.97 (t, *J* = 7.4 Hz, 1H), 7.05 (d, *J* = 7.2 Hz, 2H), 7.12 (t, *J* = 7.3 Hz, 1H), 7.17 (d, *J* = 7.0 Hz, 1H), 7.19-7.27 (m, 5H), 7.27-7.35 (m, 4H), 7.43-7.54 (m, 2H), 7.71 (d, *J* = 7.3 Hz, 1H), 7.84 (s, 1H); <sup>13</sup>C NMR (100 MHz, CDCl<sub>3</sub>) δ 14.8, 47.1, 80.5, 88.5, 93.0, 101.3, 106.9, 108.2, 118.3, 120.4, 125.1, 125.3, 125.4, 126.6, 127.3, 127.4, 128.1, 128.4, 128.5, 128.6, 128.9, 129.2, 129.7, 130.0, 131.1, 134.8, 136.6, 136.9, 137.3, 143.9, 146.4, 147.8, 149.7, 150.6, 151.0, 151.4; HRMS (ESI) *m/z* calcd. for C<sub>40</sub>H<sub>30</sub>ClO<sub>4</sub> [M+H]<sup>+</sup>:609.1827, found:609.1829.

**(6R,7R,12S,13S)-12-(3-chlorophenyl)-7-methyl-6-phenyl-13-((E)-2-(thiophen-2-yl)vinyl)-6,7,12,13-tetrahydro-7,12-epoxy[1,3]dioxolo[4',5':4,5]benzo[1,2-b]naphtho[2,3-e]oxepine (4b)**

White solid, m.p. = 78-80 °C; 52 mg, 85% yield;  $[\alpha]_D^{20.0} = -42.8$  (0.1, CH<sub>2</sub>Cl<sub>2</sub>); <sup>1</sup>H NMR (400 MHz, CDCl<sub>3</sub>)  $\delta$  1.42 (s, 3H), 3.99 (d, *J* = 7.5 Hz, 1H), 5.56 (s, 1H), 5.63 (s, 1H), 5.75 (d, *J* = 8.2 Hz, 2H), 5.80 (dd, *J* = 7.8, 15.6 Hz, 1H), 5.96 (d, *J* = 15.6 Hz, 1H), 6.45 (s, 1H), 6.64 (d, *J* = 3.4 Hz, 1H), 6.85-6.91 (m, 1H), 7.00 (t, *J* = 7.4 Hz, 1H), 7.07 (d, *J* = 5.0 Hz, 1H), 7.12 (t, *J* = 7.3 Hz, 1H), 7.19-7.34 (m, 7H), 7.43-7.53 (m, 2H), 7.70 (d, *J* = 7.4 Hz, 1H), 7.82 (s, 1H); <sup>13</sup>C NMR (100 MHz, CDCl<sub>3</sub>)  $\delta$  14.8, 46.6, 80.4, 88.5, 93.0, 101.3, 106.9, 108.2, 118.3, 120.4, 124.2, 124.4, 125.2, 125.3, 125.4, 125.6, 127.1, 127.2, 127.3, 128.4, 128.5, 128.6, 129.2, 129.7, 130.0, 134.9, 136.5, 137.2, 142.0, 143.9, 146.4, 147.9, 150.0, 150.3, 150.9, 151.3; HRMS (ESI) *m/z* calcd. for C<sub>38</sub>H<sub>28</sub>ClO<sub>4</sub>S [M+H]<sup>+</sup>:615.1391, found: 615.1391.

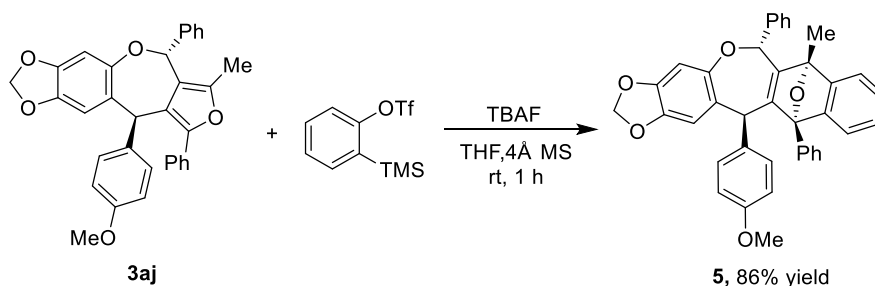

TBAF (0.6 mL, 0.3 mmol in THF) was slowly added dropwise to a stirred solution of 4 Å MS (60 mg), chiral furan **3aj** (0.1 mmol, 50 mg) and the triflate (0.6 mmol) in dry THF (2.0 mL) at room temperature under nitrogen. After stirring for 1 h, the solution was quenched with saturated ammonium chloride and extracted with ethyl acetate. The combined organic phase was dried over Na<sub>2</sub>SO<sub>4</sub> and concentrated in vacuum. The residue was purified by flash chromatography on silica gel with PE/EA=1/20 to afford aim product **5** as white solid (50 mg, 86% yield).

**(6R,7R,12S,13S)-13-(4-methoxyphenyl)-7-methyl-6,12-diphenyl-6,7,12,13-tetrahydro-7,12-epoxy[1,3]dioxolo[4',5':4,5]benzo[1,2-b]naphtho[2,3-e]oxepine (5)**

White solid, m.p. = 98-100 °C; 50 mg, 86% yield;  $[\alpha]_D^{20.0} = -4.4$  (0.1, CH<sub>2</sub>Cl<sub>2</sub>); <sup>1</sup>H NMR (400 MHz, CDCl<sub>3</sub>)  $\delta$  1.46 (s, 3H), 3.71 (s, 3H), 4.45 (s, 1H), 5.57 (s, 1H), 5.67 (s, 1H), 5.69 (s, 1H), 5.72 (s, 1H), 6.51 (s, 1H), 6.55 (d, *J* = 8.6 Hz, 2H), 6.69 (d, *J* = 8.6 Hz, 2H), 6.78-6.88 (m, 3H), 7.06 (t, *J* = 7.2 Hz, 1H), 7.25-7.35 (m, 4H), 7.42-7.50 (m, 4H),

7.54 (d,  $J = 7.2$  Hz, 2H);  $^{13}\text{C}$  NMR (100 MHz,  $\text{CDCl}_3$ )  $\delta$  14.9, 48.7, 55.3, 80.5, 88.3, 93.6, 101.2, 106.9, 108.3, 113.7, 117.8, 120.3, 124.7, 125.1, 126.2, 126.8, 128.1, 128.4, 128.5, 129.1, 129.5, 129.8, 130.8, 131.9, 135.1, 136.7, 143.7, 146.1, 147.3, 149.7, 151.1, 151.3, 158.4; HRMS (ESI)  $m/z$  calcd. for  $\text{C}_{39}\text{H}_{31}\text{O}_5$   $[\text{M}+\text{H}]^+$ : 579.2166, found: 579.2167.

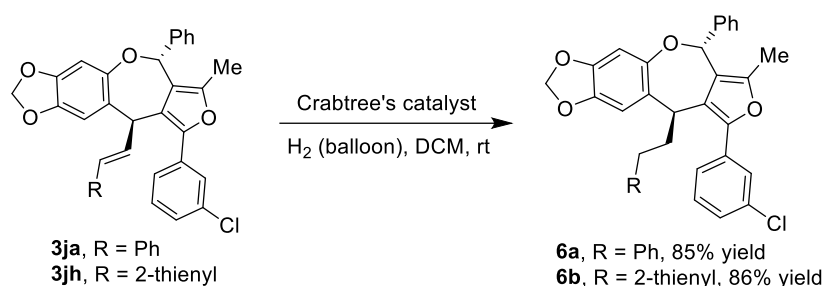

A stirred solution of chiral product (0.1 mmol) in DCM (4.0 mL) was added Crabtree's catalyst (10%, 8 mg) at room temperature and the reaction mixture was stirred for 48 h under  $\text{H}_2$  atmosphere. Subsequently, the solvent was evaporated in vacuo. The residue was purified by flash chromatography with PE/EA=1/40 to afford aim product **6**.

**(6R,10S)-9-(3-chlorophenyl)-7-methyl-10-phenethyl-6-phenyl-6H,10H-[1,3]dioxolo[4',5':4,5]benzo[1,2-b]furo[3,4-e]oxepine (6a)**

Colorless oil, 46 mg, 86% yield;  $[\alpha]_{\text{D}}^{20.0} = -161.1$  (0.1,  $\text{CH}_2\text{Cl}_2$ );  $^1\text{H}$  NMR (400 MHz,  $\text{CDCl}_3$ )  $\delta$  1.77 (s, 3H), 2.16-2.26 (m, 1H), 2.45-2.55 (m, 1H), 2.58-2.68 (m, 1H), 2.88-3.00 (m, 1H), 3.83 (dd,  $J = 3.9, 11.0$  Hz, 1H), 5.68 (s, 1H), 5.80 (s, 1H), 5.83 (s, 1H), 6.29 (s, 1H), 6.57 (s, 1H), 7.14 - 6.96 (m, 2H), 7.23 - 7.16 (m, 6H), 7.22-7.32 (m, 5H), 7.56 (s, 1H);  $^{13}\text{C}$  NMR (100 MHz,  $\text{CDCl}_3$ )  $\delta$  12.7, 34.1, 37.7, 41.1, 78.7, 101.2, 107.3, 109.6, 120.1, 123.5, 124.6, 125.8, 125.9, 126.7, 128.2, 128.5, 128.6, 128.7, 128.9, 129.5, 129.8, 129.9, 133.1, 134.7, 138.9, 141.9, 143.7, 144.0, 146.1, 147.4; HRMS (ESI)  $m/z$  calcd. for  $\text{C}_{34}\text{H}_{28}\text{ClO}_4$   $[\text{M}+\text{H}]^+$ : 535.1671, found: 535.1676.

**(6R,10S)-9-(3-chlorophenyl)-7-methyl-6-phenyl-10-(2-(thiophen-2-yl)ethyl)-6H,10H-[1,3]dioxolo[4',5':4,5]benzo[1,2-b]furo[3,4-e]oxepine (6b)**

White solid, 47 mg, 87% yield;  $[\alpha]_D^{20.0} = -71.1$  (0.1,  $\text{CH}_2\text{Cl}_2$ );  $^1\text{H}$  NMR (400 MHz,  $\text{CDCl}_3$ )  $\delta$  1.77 (s, 3H), 2.19-2.33 (m, 1H), 2.68-2.84 (m, 2H), 2.93-3.02 (m, 1H), 3.92 (dd,  $J = 4.4, 11.0$  Hz, 1H), 5.68 (s, 1H), 5.76 (s, 1H), 5.79 (s, 1H), 6.29 (s, 1H), 6.59 (s, 1H), 6.77 (d,  $J = 3.3$  Hz, 1H), 6.89-6.96 (m, 1H), 7.04 (s, 2H), 7.12 (d,  $J = 5.0$  Hz, 1H), 7.18-7.30 (m, 6H), 7.57 (s, 1H);  $^{13}\text{C}$  NMR (100 MHz,  $\text{CDCl}_3$ )  $\delta$  12.7, 28.1, 37.9, 40.6, 78.6, 101.2, 107.3, 109.5, 120.1, 123.2, 123.7, 124.3, 124.7, 125.9, 126.8, 126.9, 128.1, 128.2, 128.7, 129.4, 129.5, 129.9, 133.1, 134.7, 138.8, 143.7, 144.2, 144.6, 146.2, 147.4; HRMS (ESI)  $m/z$  calcd. for  $\text{C}_{32}\text{H}_{26}\text{ClO}_4\text{S}$   $[\text{M}+\text{H}]^+$ : 541.1235, found: 541.1238.

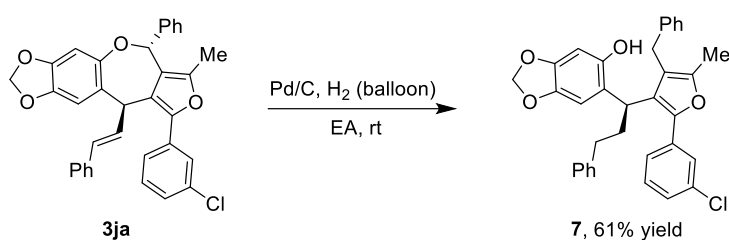

To a stirred solution of **3ja** (0.1 mmol) in ethyl acetate (4.0 mL), Pd/C (10%, 30 mg) was added and the reaction mixture was stirred at room temperature for 48 h under  $\text{H}_2$  atmosphere. Subsequently, it was filtered to remove Pd/C and the solvent was evaporated in vacuo. The residue was purified by silica gel column with hexanes/ethyl acetate (5:1, v/v) to afford **7** as white solid (38 mg, 71% yield).

**(S)-6-(1-(4-benzyl-2-(3-chlorophenyl)-5-methylfuran-3-yl)-3-phenylpropyl)benzo[d][1,3]dioxol-5-ol (7)**

Colorless oil, 38 mg, 71% yield;  $[\alpha]_D^{20.0} = -161.1$  (0.1,  $\text{CH}_2\text{Cl}_2$ );  $^1\text{H}$  NMR (400 MHz,  $\text{CDCl}_3$ )  $\delta$  1.90-2.04 (m, 1H), 2.15-2.26 (m, 1H), 2.21 (s, 3H), 2.43-2.58 (m, 2H), 3.50 (d,  $J = 16.8$  Hz, 1H), 3.64 (d,  $J = 16.8$  Hz, 1H), 4.20 (t,  $J = 7.6$  Hz, 1H), 4.54 (s, 1H), 5.82 (s, 1H), 5.86 (s, 1H), 6.25 (s, 1H), 6.70 (s, 1H), 6.87 (d,  $J = 7.7$  Hz, 2H), 6.95 (d,  $J = 7.5$  Hz, 2H), 7.12-7.24 (m, 5H), 7.27-7.35 (m, 3H), 7.45 (d,  $J = 7.9$  Hz, 2H);  $^{13}\text{C}$  NMR (100 MHz,  $\text{CDCl}_3$ )  $\delta$  12.0, 29.6, 33.7, 34.2, 34.7, 99.1, 101.0, 107.0, 118.2, 119.6, 122.2, 125.9, 126.0, 127.3, 127.7, 127.8, 127.9, 128.3, 128.4, 128.5, 128.6, 128.7, 131.0, 139.9, 141.5, 141.6, 146.5, 148.0, 149.4, 150.5; HRMS (ESI)  $m/z$  calcd. for  $\text{C}_{34}\text{H}_{30}\text{ClO}_4$

[M+H]<sup>+</sup>: 537.1827, found: 537.1972.

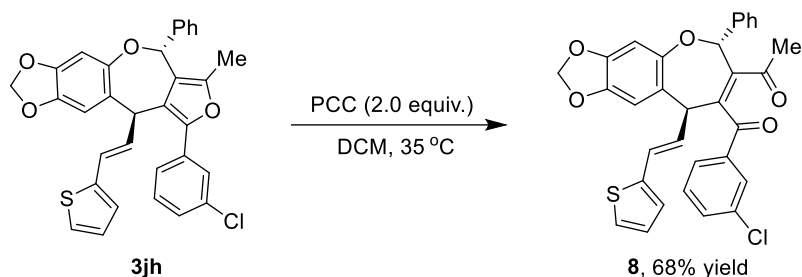

To a stirred solution of **3jh** (0.1 mmol) in DCM (2.0 mL), PCC (2.0 equiv.) was added and the reaction mixture was stirred at 35°C overnight. Subsequently, it was filtered by silica gel, then the solvent was evaporated in vacuo. The residue was purified by silica gel column with hexanes/ethyl acetate (10:1, v/v) to afford **8** as white solid (38 mg, 68% yield).

**1-((6R,9S)-8-(3-chlorobenzoyl)-6-phenyl-9-((E)-2-(thiophen-2-yl)vinyl)-6,9-dihydro-[1,3]dioxolo[4',5':4,5]benzo[1,2-b]oxepin-7-yl)ethan-1-one (8)**

White solid, m.p. = 128-130°C; 38 mg, 68% yield;  $[\alpha]_{\text{D}}^{20.0} = -51.1$  (0.1, CH<sub>2</sub>Cl<sub>2</sub>); <sup>1</sup>H NMR (400 MHz, CDCl<sub>3</sub>)  $\delta$  1.89 (s, 3H), 4.11 (d,  $J = 7.8$  Hz, 1H), 5.80 (s, 1H), 5.81 (s, 1H), 5.85 (s, 1H), 6.36-6.42 (m, 2H), 6.48 (dd,  $J = 7.9, 15.5$  Hz, 1H), 6.55 (s, 1H), 6.83 (d,  $J = 3.1$  Hz, 1H), 6.86 - 6.90 (m, 1H), 7.10 (d,  $J = 4.9$  Hz, 1H), 7.16 (d,  $J = 5.7$  Hz, 2H), 7.28-7.32 (m, 3H), 7.41 (t,  $J = 7.8$  Hz, 1H), 7.52 (d,  $J = 8.0$  Hz, 1H), 7.75 (d,  $J = 7.7$  Hz, 1H), 7.93 (s, 1H); <sup>13</sup>C NMR (100 MHz, CDCl<sub>3</sub>)  $\delta$  29.1, 50.6, 80.5, 101.5, 106.1, 107.9, 124.5, 125.2, 126.1, 126.7, 127.2, 127.3, 128.1, 128.9, 129.0, 129.4, 129.6, 130.2, 133.2, 135.3, 135.6, 137.8, 140.2, 141.5, 144.5, 147.2, 147.3, 147.6, 197.1, 199.2; HRMS (ESI)  $m/z$  calcd. for C<sub>32</sub>H<sub>24</sub>ClO<sub>5</sub>S [M+H]<sup>+</sup>: 555.1027, found: 555.1027.

## 5. X-ray Crystallography data

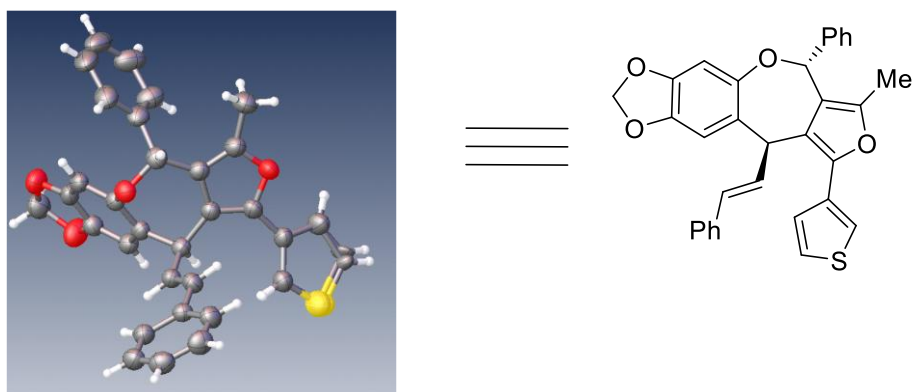

X-ray crystal structure analysis of **30a** (210625A\_auto)

### 210625A\_auto

**Table S5 Crystal data and structure refinement for 210625A\_auto.**

|                                    |                                                  |
|------------------------------------|--------------------------------------------------|
| Identification code                | 210625A_auto                                     |
| Empirical formula                  | C <sub>32</sub> H <sub>24</sub> O <sub>4</sub> S |
| Formula weight                     | 504.57                                           |
| Temperature/K                      | 293(2)                                           |
| Crystal system                     | triclinic                                        |
| Space group                        | P-1                                              |
| a/Å                                | 10.4684(3)                                       |
| b/Å                                | 10.4701(3)                                       |
| c/Å                                | 12.0220(3)                                       |
| α/°                                | 102.237(2)                                       |
| β/°                                | 93.776(2)                                        |
| γ/°                                | 97.639(2)                                        |
| Volume/Å <sup>3</sup>              | 1270.28(6)                                       |
| Z                                  | 2                                                |
| ρ <sub>calc</sub> /cm <sup>3</sup> | 1.319                                            |
| μ/mm <sup>-1</sup>                 | 1.429                                            |

|                                             |                                                               |
|---------------------------------------------|---------------------------------------------------------------|
| F(000)                                      | 528.0                                                         |
| Crystal size/mm <sup>3</sup>                | 0.06 × 0.06 × 0.05                                            |
| Radiation                                   | Cu Kα (λ = 1.54184)                                           |
| 2θ range for data collection/°              | 7.56 to 134.118                                               |
| Index ranges                                | -12 ≤ h ≤ 12, -12 ≤ k ≤ 12, -14 ≤ l ≤ 14                      |
| Reflections collected                       | 35351                                                         |
| Independent reflections                     | 4536 [R <sub>int</sub> = 0.0660, R <sub>sigma</sub> = 0.0400] |
| Data/restraints/parameters                  | 4536/24/353                                                   |
| Goodness-of-fit on F <sup>2</sup>           | 1.046                                                         |
| Final R indexes [I ≥ 2σ (I)]                | R <sub>1</sub> = 0.0447, wR <sub>2</sub> = 0.1198             |
| Final R indexes [all data]                  | R <sub>1</sub> = 0.0592, wR <sub>2</sub> = 0.1293             |
| Largest diff. peak/hole / e Å <sup>-3</sup> | 0.28/-0.38                                                    |

**Table S6 Fractional Atomic Coordinates (×10<sup>4</sup>) and Equivalent Isotropic Displacement Parameters (Å<sup>2</sup>×10<sup>3</sup>) for 210625A\_auto. U<sub>eq</sub> is defined as 1/3 of of the trace of the orthogonalised U<sub>ij</sub> tensor.**

| Atom | x          | y           | z          | U(eq)    |
|------|------------|-------------|------------|----------|
| S1   | 4962(13)   | 1951(14)    | 1144(11)   | 80.7(19) |
| S1A  | 4753(3)    | 1786(2)     | 931(2)     | 63.6(4)  |
| O1   | 7654.1(13) | 8847.4(13)  | 4023.7(11) | 52.0(3)  |
| O2   | 4109.6(16) | 11288.0(15) | 3486.3(14) | 67.3(4)  |
| O3   | 2612.6(15) | 9370.2(17)  | 2993.6(16) | 75.5(5)  |
| O4   | 8025.8(14) | 5595.2(14)  | 830.5(11)  | 56.1(4)  |
| C1   | 5501.8(18) | 7766.5(18)  | 3341.7(14) | 44.1(4)  |
| C2   | 8648.4(19) | 9853(2)     | 2591.8(19) | 54.6(5)  |
| C3   | 5986(2)    | 3364(2)     | -113.4(18) | 64.9(6)  |
| C4   | 7000.5(18) | 6330.6(18)  | 2366.5(15) | 45.2(4)  |
| C5   | 5215(18)   | 2243(13)    | -390(11)   | 50.3(18) |
| C5A  | 5172(16)   | 2027(11)    | -203(10)   | 47(2)    |
| C6   | 6379.3(19) | 8935.1(19)  | 3687.6(15) | 45.8(4)  |



|     |            |             |            |          |
|-----|------------|-------------|------------|----------|
| C7  | 9384(2)    | 11005(2)    | 3231(2)    | 73.6(7)  |
| C8  | 4187.1(19) | 7837.5(19)  | 3114.3(16) | 48.6(4)  |
| C9  | 5639(2)    | 3247(2)     | 1733.2(17) | 55.3(5)  |
| C10 | 6345.7(19) | 6127.5(19)  | 4336.2(16) | 48.1(4)  |
| C11 | 8583(2)    | 4859(2)     | 7827(2)    | 64.7(6)  |
| C12 | 7685.0(19) | 5234.6(19)  | 5700.3(16) | 47.6(4)  |
| C13 | 8029(2)    | 9884(2)     | 1552(2)    | 69.1(6)  |
| C14 | 5970.0(18) | 6434.0(18)  | 3192.2(15) | 45.2(4)  |
| C15 | 8847(3)    | 12175(3)    | 1809(4)    | 92.4(10) |
| C16 | 7026(2)    | 5293(2)     | 1475.8(15) | 49.1(5)  |
| C17 | 8491.4(19) | 8644(2)     | 3101.7(17) | 52.0(5)  |
| C18 | 4724(2)    | 10200.5(19) | 3500.9(16) | 50.5(5)  |
| C19 | 8615(2)    | 4431(2)     | 5796.1(19) | 58.5(5)  |
| C20 | 8049.0(19) | 7336.0(19)  | 2281.0(16) | 47.7(4)  |
| C21 | 7645(2)    | 5640(2)     | 7750.3(18) | 59.7(5)  |
| C22 | 7296(2)    | 5501(2)     | 4575.6(16) | 51.4(5)  |
| C23 | 9059(2)    | 4246(2)     | 6854(2)    | 65.8(6)  |
| C24 | 7193(2)    | 5823(2)     | 6698.8(16) | 52.4(5)  |
| C25 | 2771(2)    | 10780(2)    | 3215(2)    | 68.5(6)  |
| C26 | 6235(2)    | 4004.5(19)  | 1060.6(16) | 50.0(4)  |
| C27 | 9745(2)    | 7380(3)     | 781(2)     | 69.9(6)  |
| C28 | 6003(2)    | 10181.0(19) | 3767.3(16) | 50.1(5)  |
| C29 | 8128(3)    | 11053(3)    | 1159(3)    | 86.4(8)  |
| C30 | 8634(2)    | 6845(2)     | 1342.7(17) | 54.1(5)  |
| C31 | 9479(3)    | 12165(3)    | 2837(3)    | 91.9(10) |
| C32 | 3830.6(19) | 9064(2)     | 3199.5(16) | 50.8(5)  |

**Table S7 Anisotropic Displacement Parameters ( $\text{\AA}^2 \times 10^3$ ) for 210625A\_auto. The Anisotropic displacement factor exponent takes the form: -**

$$2\pi^2[h^2a^{*2}U_{11}+2hka^*b^*U_{12}+\dots].$$

| Atom | U <sub>11</sub> | U <sub>22</sub> | U <sub>33</sub> | U <sub>23</sub> | U <sub>13</sub> | U <sub>12</sub> |
|------|-----------------|-----------------|-----------------|-----------------|-----------------|-----------------|
| S1   | 92(4)           | 75(3)           | 64(3)           | 3(3)            | 11(3)           | -4(3)           |
| S1A  | 76.1(9)         | 49.8(7)         | 56.7(9)         | 2.0(6)          | 11.8(6)         | -6.2(5)         |
| O1   | 55.8(8)         | 52.7(8)         | 44.0(7)         | 6.6(6)          | 1.3(6)          | 3.8(6)          |
| O2   | 77.0(10)        | 49.7(9)         | 80.5(10)        | 15.1(7)         | 18.0(8)         | 22.5(8)         |
| O3   | 60.3(9)         | 63.0(10)        | 103.8(13)       | 14.4(9)         | 6.2(8)          | 19.3(8)         |
| O4   | 71.9(9)         | 52.5(8)         | 43.8(7)         | 9.5(6)          | 16.8(6)         | 5.7(7)          |
| C1   | 55.4(11)        | 40.8(10)        | 35.7(9)         | 6.9(7)          | 6.1(7)          | 7.1(8)          |
| C2   | 44.5(10)        | 50.2(12)        | 67.8(13)        | 11.8(10)        | 13.2(9)         | 0.9(8)          |
| C3   | 89.4(15)        | 58.0(13)        | 43.1(10)        | 9.0(9)          | 9.4(10)         | -1.5(11)        |
| C4   | 55.2(11)        | 43.3(10)        | 38.4(9)         | 11.1(8)         | 6.2(8)          | 8.4(8)          |
| C5   | 80(3)           | 49(4)           | 23(3)           | 18(3)           | 13(2)           | -7(3)           |
| C5A  | 73(3)           | 31(4)           | 31(5)           | 10(3)           | 2(3)            | -12(3)          |
| C6   | 54.9(11)        | 44.0(11)        | 37.2(9)         | 7.3(8)          | 5.4(8)          | 5.1(8)          |
| C7   | 66.5(14)        | 62.4(15)        | 82.4(16)        | 1.9(12)         | 21.3(12)        | -8.9(11)        |
| C8   | 54.8(11)        | 43.9(11)        | 46.0(10)        | 8.1(8)          | 7.8(8)          | 5.3(8)          |
| C9   | 69.4(12)        | 50.6(11)        | 45.0(10)        | 7.2(8)          | 11.5(9)         | 8.6(9)          |
| C10  | 59.9(11)        | 42.8(11)        | 43.9(10)        | 11.6(8)         | 13.7(8)         | 8.4(9)          |
| C11  | 73.7(14)        | 65.3(14)        | 56.4(12)        | 22.7(11)        | -1.9(10)        | 4.7(11)         |
| C12  | 52.4(10)        | 43.7(10)        | 47.8(10)        | 12.8(8)         | 9.8(8)          | 4.1(8)          |
| C13  | 61.1(13)        | 62.7(15)        | 86.2(16)        | 28.1(12)        | 6.0(12)         | 1.1(11)         |
| C14  | 51.3(10)        | 39.2(10)        | 43.9(10)        | 8.1(8)          | 6.3(8)          | 4.1(8)          |
| C15  | 92(2)           | 62.2(18)        | 138(3)          | 39.6(19)        | 59(2)           | 13.1(15)        |
| C16  | 62.3(12)        | 48.4(11)        | 39.3(9)         | 13.0(8)         | 11.4(8)         | 9.8(9)          |
| C17  | 48.7(10)        | 53.2(12)        | 51.1(11)        | 7.4(9)          | 2.9(8)          | 5.0(9)          |
| C18  | 69.4(13)        | 42.7(11)        | 43.4(10)        | 10.3(8)         | 16.1(9)         | 15.7(9)         |
| C19  | 61.3(12)        | 58.8(13)        | 60.5(12)        | 16.4(10)        | 16.4(10)        | 17.3(10)        |
| C20  | 54.3(11)        | 45.4(11)        | 44.6(10)        | 13.2(8)         | 4.7(8)          | 6.3(8)          |
| C21  | 75.9(14)        | 55.5(13)        | 48.5(11)        | 13.7(9)         | 9.7(10)         | 7.5(11)         |
| C22  | 59.3(12)        | 52.5(12)        | 45.5(10)        | 12.4(9)         | 15.6(8)         | 12.3(9)         |
| C23  | 64.0(13)        | 65.0(14)        | 74.6(15)        | 24.9(12)        | 3.3(11)         | 18.1(11)        |

|     |          |          |          |          |          |           |
|-----|----------|----------|----------|----------|----------|-----------|
| C24 | 61.1(12) | 48.3(11) | 50.9(11) | 14.6(9)  | 11.5(9)  | 10.1(9)   |
| C25 | 74.0(15) | 65.1(15) | 75.4(15) | 21.0(12) | 18.0(12) | 28.9(12)  |
| C26 | 64.9(11) | 43.7(10) | 41.3(9)  | 6.9(8)   | 8.9(8)   | 10.3(8)   |
| C27 | 74.4(15) | 72.1(16) | 66.3(14) | 19.7(12) | 25.2(11) | 5.8(12)   |
| C28 | 62.7(12) | 41.5(11) | 44.2(10) | 5.4(8)   | 12.5(8)  | 3.8(9)    |
| C29 | 76.5(17) | 88(2)    | 113(2)   | 54.6(18) | 23.8(15) | 17.6(15)  |
| C30 | 64.3(12) | 49.9(12) | 47.9(11) | 13.0(9)  | 9.0(9)   | 3.1(9)    |
| C31 | 97(2)    | 51.9(16) | 119(3)   | 3.5(15)  | 51.3(19) | -13.8(14) |
| C32 | 53.9(11) | 53.2(12) | 47.1(10) | 10.3(9)  | 9.9(8)   | 13.2(9)   |

**Table S8 Bond Lengths for 210625A\_auto.**

| Atom | Atom | Length/Å  | Atom | Atom | Length/Å |
|------|------|-----------|------|------|----------|
| S1   | C5   | 1.961(17) | C4   | C20  | 1.441(3) |
| S1   | C9   | 1.455(11) | C6   | C28  | 1.398(3) |
| S1A  | C5A  | 1.520(11) | C7   | C31  | 1.388(4) |
| S1A  | C9   | 1.735(3)  | C8   | C32  | 1.369(3) |
| O1   | C6   | 1.389(2)  | C9   | C26  | 1.371(3) |
| O1   | C17  | 1.456(2)  | C10  | C14  | 1.516(3) |
| O2   | C18  | 1.383(2)  | C10  | C22  | 1.311(3) |
| O2   | C25  | 1.422(3)  | C11  | C21  | 1.369(3) |
| O3   | C25  | 1.428(3)  | C11  | C23  | 1.368(3) |
| O3   | C32  | 1.375(2)  | C12  | C19  | 1.384(3) |
| O4   | C16  | 1.386(2)  | C12  | C22  | 1.480(3) |
| O4   | C30  | 1.372(3)  | C12  | C24  | 1.392(3) |
| C1   | C6   | 1.396(3)  | C13  | C29  | 1.396(4) |
| C1   | C8   | 1.400(3)  | C15  | C29  | 1.362(5) |
| C1   | C14  | 1.519(3)  | C15  | C31  | 1.365(5) |
| C2   | C7   | 1.386(3)  | C16  | C26  | 1.455(3) |
| C2   | C13  | 1.378(3)  | C17  | C20  | 1.504(3) |
| C2   | C17  | 1.513(3)  | C18  | C28  | 1.360(3) |

|    |     |           |     |     |          |
|----|-----|-----------|-----|-----|----------|
| C3 | C5  | 1.298(14) | C18 | C32 | 1.378(3) |
| C3 | C5A | 1.517(11) | C19 | C23 | 1.386(3) |
| C3 | C26 | 1.419(3)  | C20 | C30 | 1.357(3) |
| C4 | C14 | 1.512(2)  | C21 | C24 | 1.381(3) |
| C4 | C16 | 1.359(3)  | C27 | C30 | 1.487(3) |

**Table S9 Bond Angles for 210625A\_auto.**

| Atom | Atom | Atom | Angle/°    | Atom | Atom | Atom | Angle/°    |
|------|------|------|------------|------|------|------|------------|
| C9   | S1   | C5   | 94.5(9)    | C4   | C14  | C10  | 114.81(15) |
| C5A  | S1A  | C9   | 94.2(5)    | C10  | C14  | C1   | 111.45(15) |
| C6   | O1   | C17  | 115.19(14) | C29  | C15  | C31  | 120.7(3)   |
| C18  | O2   | C25  | 105.61(17) | O4   | C16  | C26  | 115.87(16) |
| C32  | O3   | C25  | 105.46(18) | C4   | C16  | O4   | 109.64(17) |
| C30  | O4   | C16  | 107.07(15) | C4   | C16  | C26  | 134.46(18) |
| C6   | C1   | C8   | 119.20(17) | O1   | C17  | C2   | 109.31(16) |
| C6   | C1   | C14  | 120.43(17) | O1   | C17  | C20  | 110.93(16) |
| C8   | C1   | C14  | 120.36(17) | C20  | C17  | C2   | 116.56(17) |
| C7   | C2   | C17  | 118.5(2)   | C28  | C18  | O2   | 127.96(19) |
| C13  | C2   | C7   | 118.4(2)   | C28  | C18  | C32  | 122.40(18) |
| C13  | C2   | C17  | 123.03(19) | C32  | C18  | O2   | 109.64(18) |
| C5   | C3   | C26  | 118.3(6)   | C12  | C19  | C23  | 120.9(2)   |
| C26  | C3   | C5A  | 108.2(5)   | C4   | C20  | C17  | 127.70(16) |
| C16  | C4   | C14  | 125.39(18) | C30  | C20  | C4   | 106.73(17) |
| C16  | C4   | C20  | 106.52(16) | C30  | C20  | C17  | 125.45(18) |
| C20  | C4   | C14  | 127.77(16) | C11  | C21  | C24  | 120.3(2)   |
| C3   | C5   | S1   | 99.4(9)    | C10  | C22  | C12  | 126.65(17) |
| C3   | C5A  | S1A  | 114.1(8)   | C11  | C23  | C19  | 120.4(2)   |
| O1   | C6   | C1   | 118.25(16) | C21  | C24  | C12  | 121.1(2)   |
| O1   | C6   | C28  | 119.30(17) | O2   | C25  | O3   | 108.92(17) |
| C1   | C6   | C28  | 122.35(18) | C3   | C26  | C16  | 123.67(18) |

|     |     |     |            |     |     |     |            |
|-----|-----|-----|------------|-----|-----|-----|------------|
| C2  | C7  | C31 | 120.6(3)   | C9  | C26 | C3  | 110.97(19) |
| C32 | C8  | C1  | 117.82(19) | C9  | C26 | C16 | 125.35(17) |
| C26 | C9  | S1  | 116.2(6)   | C18 | C28 | C6  | 116.37(19) |
| C26 | C9  | S1A | 112.17(18) | C15 | C29 | C13 | 119.7(3)   |
| C22 | C10 | C14 | 126.69(17) | O4  | C30 | C27 | 116.29(18) |
| C23 | C11 | C21 | 119.6(2)   | C20 | C30 | O4  | 110.03(17) |
| C19 | C12 | C22 | 120.10(17) | C20 | C30 | C27 | 133.7(2)   |
| C19 | C12 | C24 | 117.62(18) | C15 | C31 | C7  | 119.9(3)   |
| C24 | C12 | C22 | 122.20(18) | O3  | C32 | C18 | 110.23(18) |
| C2  | C13 | C29 | 120.8(3)   | C8  | C32 | O3  | 128.0(2)   |
| C4  | C14 | C1  | 110.72(15) | C8  | C32 | C18 | 121.77(19) |

**Table S10 Torsion Angles for 210625A\_auto.**

| A   | B   | C   | D   | Angle/°     | A   | B   | C   | D   | Angle/°     |
|-----|-----|-----|-----|-------------|-----|-----|-----|-----|-------------|
| S1  | C9  | C26 | C3  | 3.6(7)      | C14 | C1  | C6  | C28 | 175.92(16)  |
| S1  | C9  | C26 | C16 | -176.2(7)   | C14 | C1  | C8  | C32 | -176.28(16) |
| S1A | C9  | C26 | C3  | -1.4(3)     | C14 | C4  | C16 | O4  | 173.49(16)  |
| S1A | C9  | C26 | C16 | 178.80(19)  | C14 | C4  | C16 | C26 | -4.5(3)     |
| O1  | C6  | C28 | C18 | -175.56(15) | C14 | C4  | C20 | C17 | 10.5(3)     |
| O1  | C17 | C20 | C4  | -3.5(3)     | C14 | C4  | C20 | C30 | -173.43(18) |
| O1  | C17 | C20 | C30 | -178.93(18) | C14 | C10 | C22 | C12 | 178.17(19)  |
| O2  | C18 | C28 | C6  | -178.52(17) | C16 | O4  | C30 | C20 | -0.2(2)     |
| O2  | C18 | C32 | O3  | -0.7(2)     | C16 | O4  | C30 | C27 | -179.56(18) |
| O2  | C18 | C32 | C8  | 178.12(17)  | C16 | C4  | C14 | C1  | -131.93(19) |
| O4  | C16 | C26 | C3  | -31.3(3)    | C16 | C4  | C14 | C10 | 100.8(2)    |
| O4  | C16 | C26 | C9  | 148.4(2)    | C16 | C4  | C20 | C17 | -175.74(19) |
| C1  | C6  | C28 | C18 | 0.7(3)      | C16 | C4  | C20 | C30 | 0.4(2)      |
| C1  | C8  | C32 | O3  | 178.46(18)  | C17 | O1  | C6  | C1  | 86.7(2)     |
| C1  | C8  | C32 | C18 | -0.1(3)     | C17 | O1  | C6  | C28 | -96.85(19)  |
| C2  | C7  | C31 | C15 | -0.1(4)     | C17 | C2  | C7  | C31 | -175.3(2)   |

|                 |             |                 |             |
|-----------------|-------------|-----------------|-------------|
| C2 C13 C29 C15  | 0.2(4)      | C17 C2 C13 C29  | 175.0(2)    |
| C2 C17 C20 C4   | -129.5(2)   | C17 C20 C30 O4  | 176.12(17)  |
| C2 C17 C20 C30  | 55.1(3)     | C17 C20 C30 C27 | -4.7(4)     |
| C4 C16 C26 C3   | 146.6(2)    | C18 O2 C25 O3   | -3.9(2)     |
| C4 C16 C26 C9   | -33.7(4)    | C19 C12 C22 C10 | 172.7(2)    |
| C4 C20 C30 O4   | -0.1(2)     | C19 C12 C24 C21 | 1.8(3)      |
| C4 C20 C30 C27  | 179.1(2)    | C20 C4 C14 C1   | 40.8(2)     |
| C5 S1 C9 C26    | -6.3(10)    | C20 C4 C14 C10  | -86.5(2)    |
| C5 C3 C26 C9    | 3.5(9)      | C20 C4 C16 O4   | -0.5(2)     |
| C5 C3 C26 C16   | -176.7(9)   | C20 C4 C16 C26  | -178.5(2)   |
| C5A S1A C9 C26  | 4.0(6)      | C21 C11 C23 C19 | 1.2(4)      |
| C5A C3 C26 C9   | -1.9(7)     | C22 C10 C14 C1  | -144.3(2)   |
| C5A C3 C26 C16  | 177.9(7)    | C22 C10 C14 C4  | -17.4(3)    |
| C6 O1 C17 C2    | 65.9(2)     | C22 C12 C19 C23 | 175.3(2)    |
| C6 O1 C17 C20   | -64.0(2)    | C22 C12 C24 C21 | -174.91(19) |
| C6 C1 C8 C32    | 2.6(3)      | C23 C11 C21 C24 | -0.9(3)     |
| C6 C1 C14 C4    | -55.7(2)    | C24 C12 C19 C23 | -1.5(3)     |
| C6 C1 C14 C10   | 73.4(2)     | C24 C12 C22 C10 | -10.7(3)    |
| C7 C2 C13 C29   | -0.8(3)     | C25 O2 C18 C28  | -176.9(2)   |
| C7 C2 C17 O1    | 71.1(2)     | C25 O2 C18 C32  | 2.8(2)      |
| C7 C2 C17 C20   | -162.10(19) | C25 O3 C32 C8   | 179.6(2)    |
| C8 C1 C6 O1     | 173.38(15)  | C25 O3 C32 C18  | -1.7(2)     |
| C8 C1 C6 C28    | -2.9(3)     | C26 C3 C5 S1    | -6.7(12)    |
| C8 C1 C14 C4    | 123.14(18)  | C26 C3 C5A S1A  | 5.0(12)     |
| C8 C1 C14 C10   | -107.76(19) | C28 C18 C32 O3  | 179.01(17)  |
| C9 S1A C5A C3   | -5.0(10)    | C28 C18 C32 C8  | -2.2(3)     |
| C11 C21 C24 C12 | -0.7(3)     | C29 C15 C31 C7  | -0.5(4)     |
| C12 C19 C23 C11 | 0.0(4)      | C30 O4 C16 C4   | 0.4(2)      |
| C13 C2 C7 C31   | 0.7(3)      | C30 O4 C16 C26  | 178.85(16)  |
| C13 C2 C17 O1   | -104.7(2)   | C31 C15 C29 C13 | 0.4(4)      |
| C13 C2 C17 C20  | 22.1(3)     | C32 O3 C25 O2   | 3.4(2)      |

C14 C1 C6 O1 -7.8(2) C32C18C28 C6 1.8(3)

**Table S11 Hydrogen Atom Coordinates ( $\text{\AA}\times 10^4$ ) and Isotropic Displacement Parameters ( $\text{\AA}^2\times 10^3$ ) for 210625A\_auto.**

| Atom | <i>x</i> | <i>y</i> | <i>z</i> | U(eq) |
|------|----------|----------|----------|-------|
| H3A  | 6366.1   | 3736.71  | -671.03  | 78    |
| H3B  | 6272.73  | 3703.81  | -722.93  | 78    |
| H5   | 4881.17  | 1730.13  | -1104.9  | 60    |
| H5A  | 4949.65  | 1409.65  | -891.18  | 56    |
| H7   | 9816.88  | 11001.79 | 3930.89  | 88    |
| H8   | 3576.07  | 7076.58  | 2911.96  | 58    |
| H9A  | 5665.25  | 3545.45  | 2521.42  | 66    |
| H9B  | 5701.97  | 3488.94  | 2527.48  | 66    |
| H10  | 5851.26  | 6413.4   | 4929.04  | 58    |
| H11  | 8895.05  | 4746.05  | 8536.75  | 78    |
| H13  | 7540.74  | 9117.82  | 1106.78  | 83    |
| H14  | 5228.23  | 5768.54  | 2831.17  | 54    |
| H15  | 8907.21  | 12955.07 | 1550.27  | 111   |
| H17  | 9348.01  | 8592.9   | 3455.77  | 62    |
| H19  | 8947.7   | 4008.57  | 5141.67  | 70    |
| H21  | 7310.51  | 6048.12  | 8408.86  | 72    |
| H22  | 7774.76  | 5191.95  | 3977.22  | 62    |
| H23  | 9684.79  | 3702.46  | 6903.18  | 79    |
| H24  | 6548.59  | 6347.3   | 6656.88  | 63    |
| H25A | 2440.71  | 11058.87 | 2546.31  | 82    |
| H25B | 2290.12  | 11115.58 | 3848.02  | 82    |
| H27A | 10153.2  | 6665.46  | 396.8    | 105   |
| H27B | 10359.08 | 7973.83  | 1348.97  | 105   |
| H27C | 9438.39  | 7847.55  | 236.12   | 105   |
| H28  | 6595.67  | 10954.56 | 3990.3   | 60    |

|     |         |          |         |     |
|-----|---------|----------|---------|-----|
| H29 | 7704.15 | 11065.52 | 457.99  | 104 |
| H31 | 9973.81 | 12934.52 | 3271.81 | 110 |

**Table S12 Atomic Occupancy for 210625A\_auto.**

| <b>Atom</b> | <b>Occupancy</b> | <b>Atom</b> | <b>Occupancy</b> | <b>Atom</b> | <b>Occupancy</b> |
|-------------|------------------|-------------|------------------|-------------|------------------|
| S1          | 0.2              | S1A         | 0.8              | H3A         | 0.5              |
| H3B         | 0.5              | C5          | 0.5              | H5          | 0.5              |
| C5A         | 0.5              | H5A         | 0.5              | H9A         | 0.5              |
| H9B         | 0.5              |             |                  |             |                  |

### Experimental

Single crystals of C<sub>32</sub>H<sub>24</sub>O<sub>4</sub>S [**210625A\_auto**] were crystallized from diethyl ether and *n*-hexane. A suitable crystal was selected on a diffractometer. The crystal was kept at 293(2) K during data collection. Using Olex2 [1], the structure was solved with the Unknown [2] structure solution program using Unknown and refined with the Unknown [3] refinement package using Unknown minimisation.

### Crystal structure determination of [210625A\_auto]

**Crystal Data** for C<sub>32</sub>H<sub>24</sub>O<sub>4</sub>S (*M* = 504.57 g/mol): triclinic, space group P-1 (no. 2), *a* = 10.4684(3) Å, *b* = 10.4701(3) Å, *c* = 12.0220(3) Å,  $\alpha$  = 102.237(2)°,  $\beta$  = 93.776(2)°,  $\gamma$  = 97.639(2)°, *V* = 1270.28(6) Å<sup>3</sup>, *Z* = 2, *T* = 293(2) K,  $\mu$ (Cu K $\alpha$ ) = 1.429 mm<sup>-1</sup>, *D*<sub>calc</sub> = 1.319 g/cm<sup>3</sup>, 35351 reflections measured (7.56° ≤ 2 $\theta$  ≤ 134.118°), 4536 unique (*R*<sub>int</sub> = 0.0660, *R*<sub>sigma</sub> = 0.0400) which were used in all calculations. The final *R*<sub>1</sub> was 0.0447 (*I* > 2 $\sigma$ (*I*)) and *wR*<sub>2</sub> was 0.1293 (all data).



## 6. References

1. Liu, F.; Qian, D.; Li, L.; Zhao, X.; Zhang, J. Diastereo- and Enantioselective Gold(I)-Catalyzed Intermolecular Tandem Cyclization/[3+3]Cycloadditions of 2-(1-Alkynyl)-2-alken-1-ones with Nitrones. *Angew. Chem.* **2010**, *122*, 6819-6822; *Angew. Chem. Int. Ed.* **2010**, *49*, 6669-6672.
2. Kardile, R. D.; Chao, T. -H.; Cheng, M. -J.; Liu, R. -S. Gold(I)-Catalyzed Highly Diastereo- and Enantioselective Cyclization-[4+3] Annulation Cascades between 2-(1-Alkynyl)-2-alken-1-ones and Anthranils. *Angew. Chem.* **2020**, *132*, 10482-10486; *Angew. Chem. Int. Ed.* **2020**, *59*, 10396-10400.
3. Trost, B. M.; Zuo, Z. Highly Regio-, Diastereo-, and Enantioselective Synthesis of Tetrahydroazepines and Benzo[b]oxepines through Palladium-Catalyzed [4+3] Cycloaddition Reactions. *Angew. Chem.* **2020**, *132*, 1259-1263; *Angew. Chem. Int. Ed.* **2020**, *59*, 1243-1247.
4. An, X. -T.; Du, J. -Y.; Jia, Z. -L.; Zhang, Q.; Yu, K. -Y.; Zhang, Y. -Z.; Zhao, X. -H.; Fang, R.; Fan, C. -A. Asymmetric Catalytic [4+5] Annulation of ortho-Quinone Methides with Vinylethylene Carbonates and its Extension to Stereoselective Tandem Rearrangement. *Chem. Eur. J.* **2020**, *26*, 3803-3809.

# 7. NMR Spectra

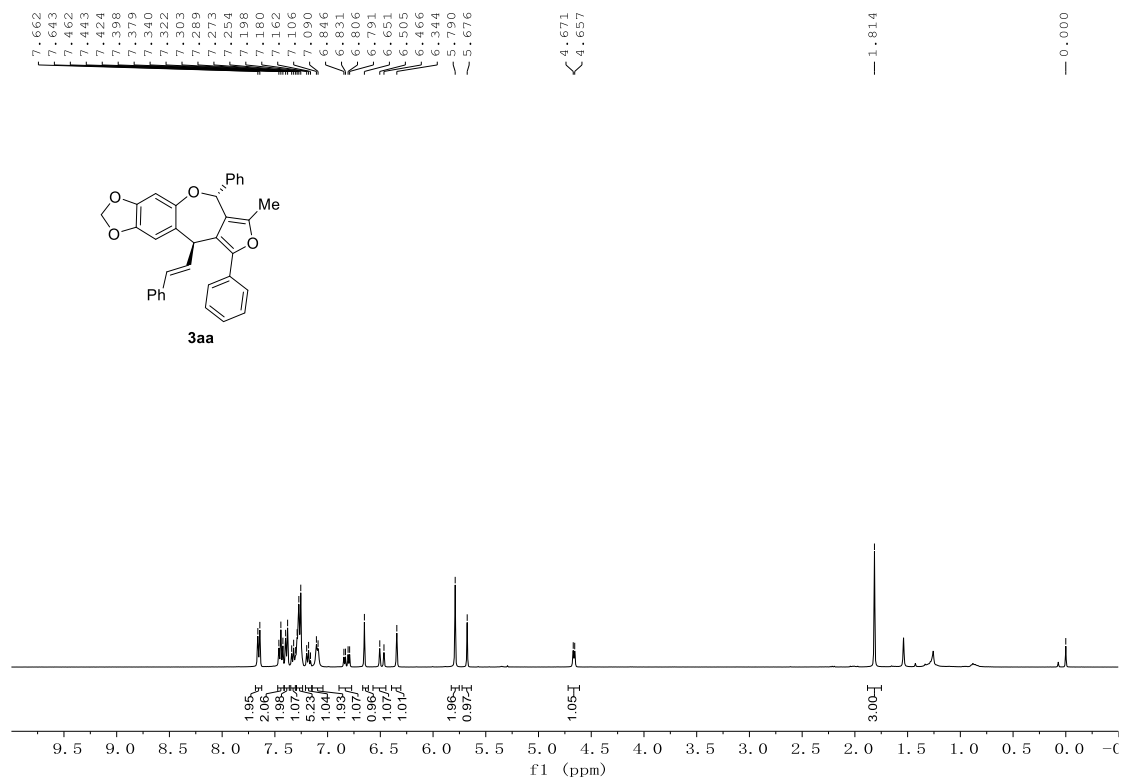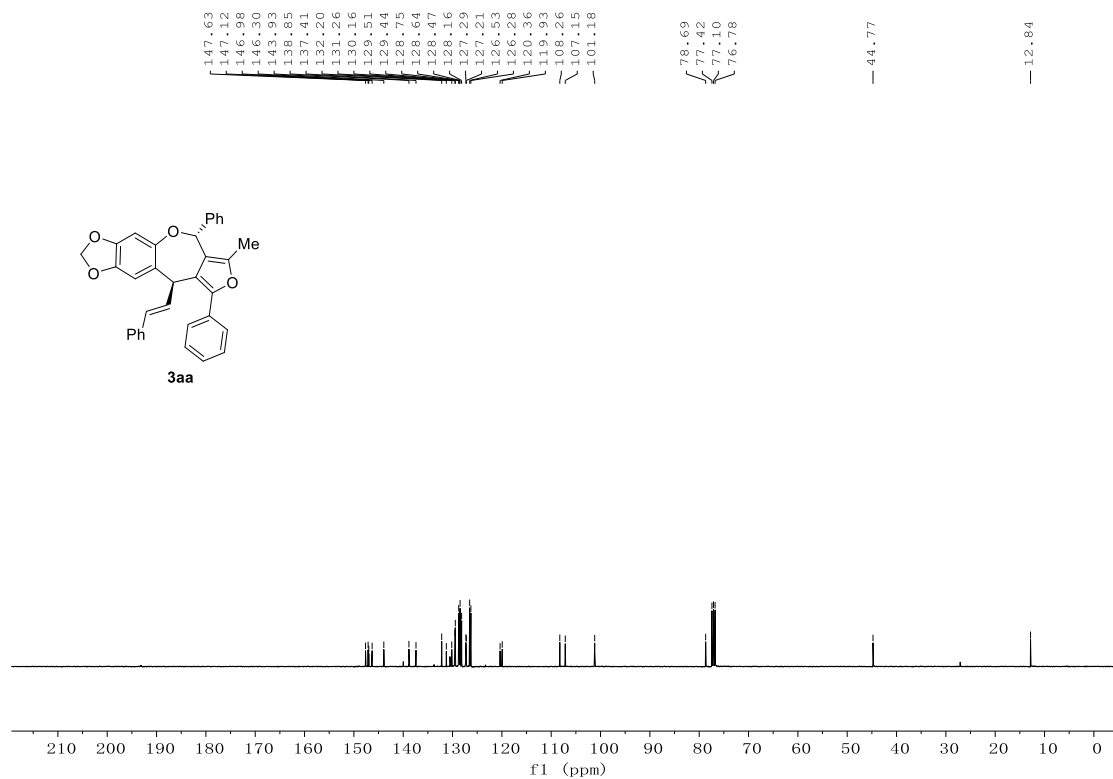

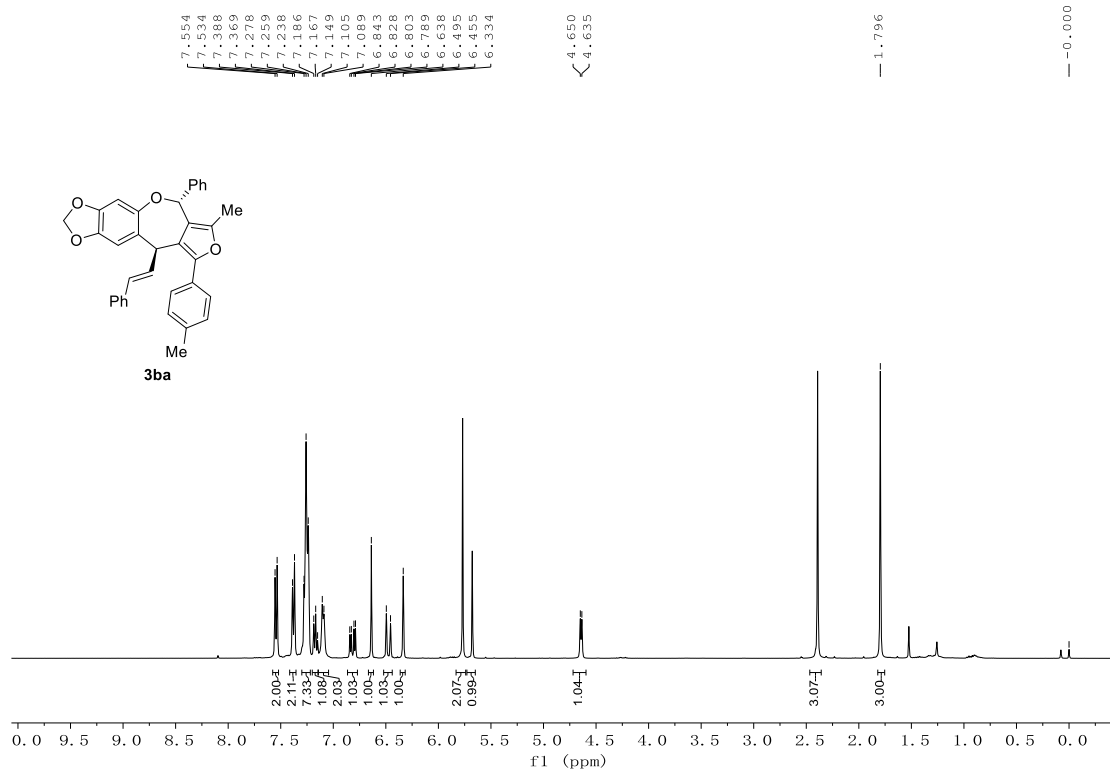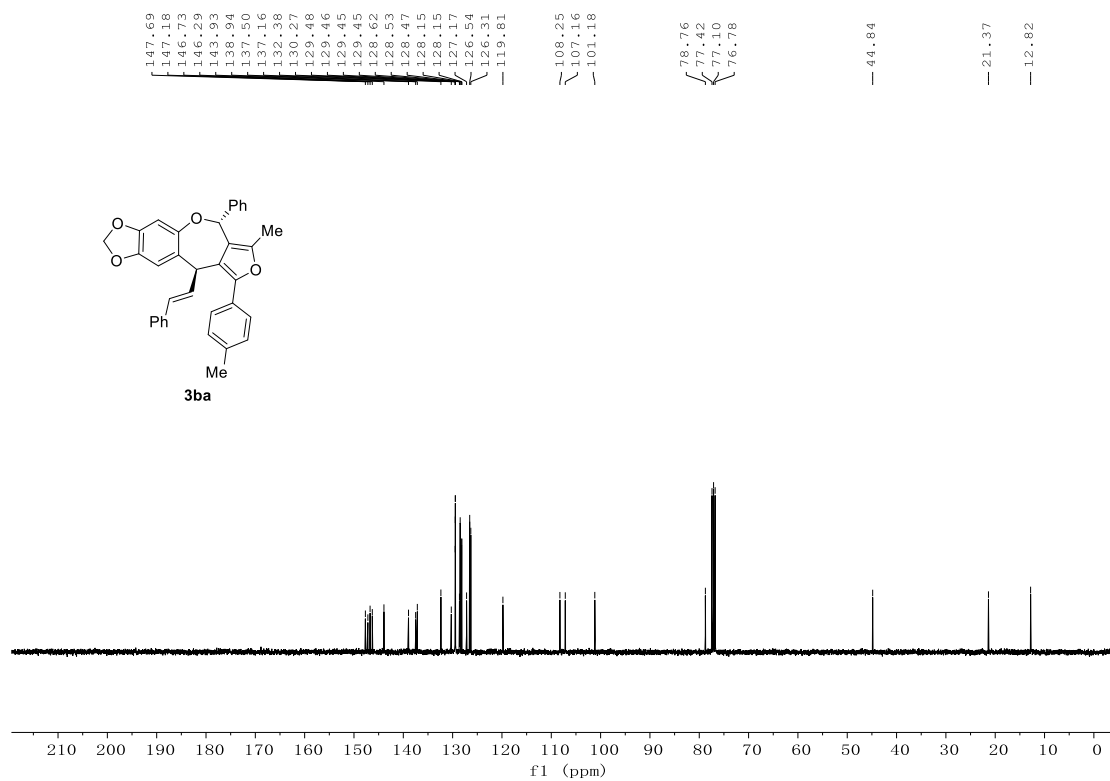

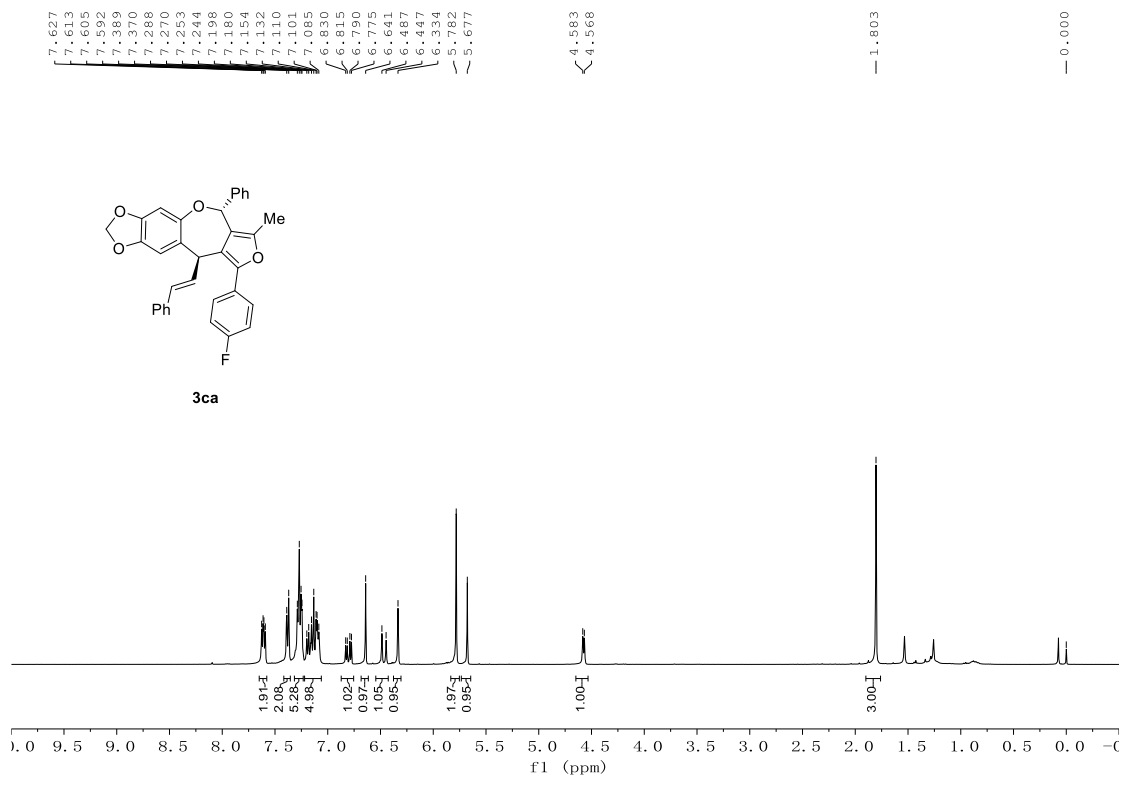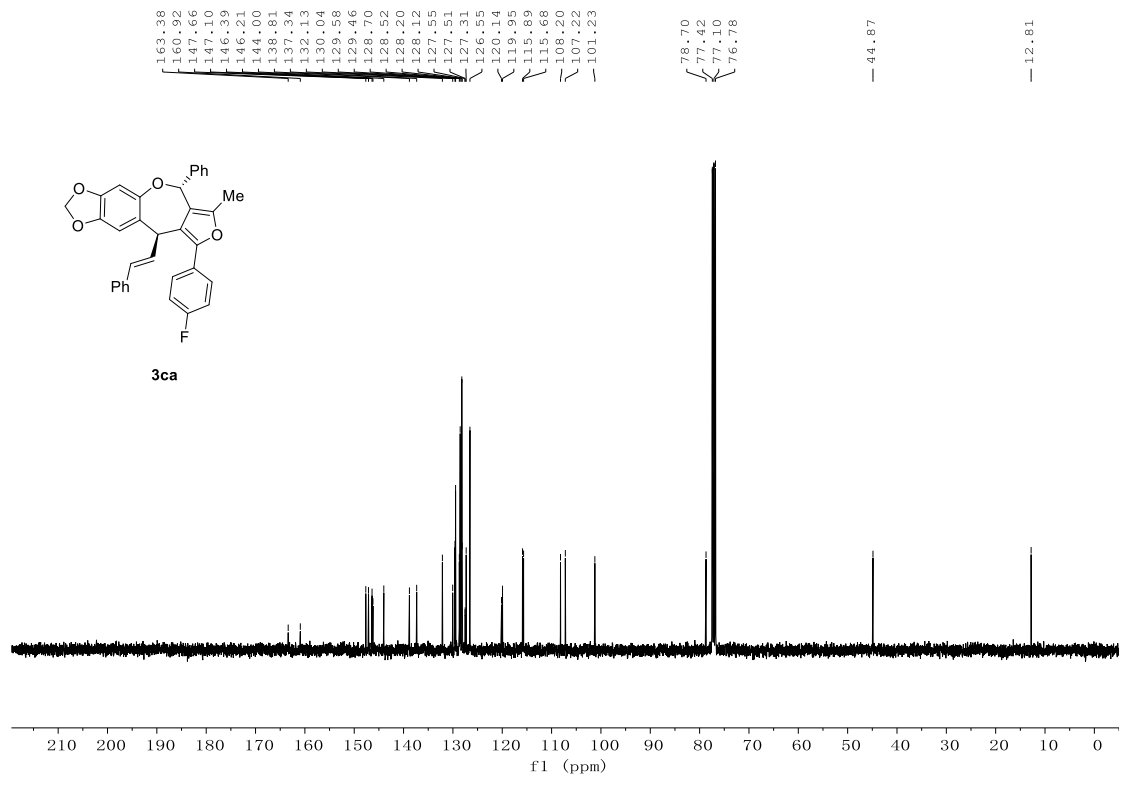

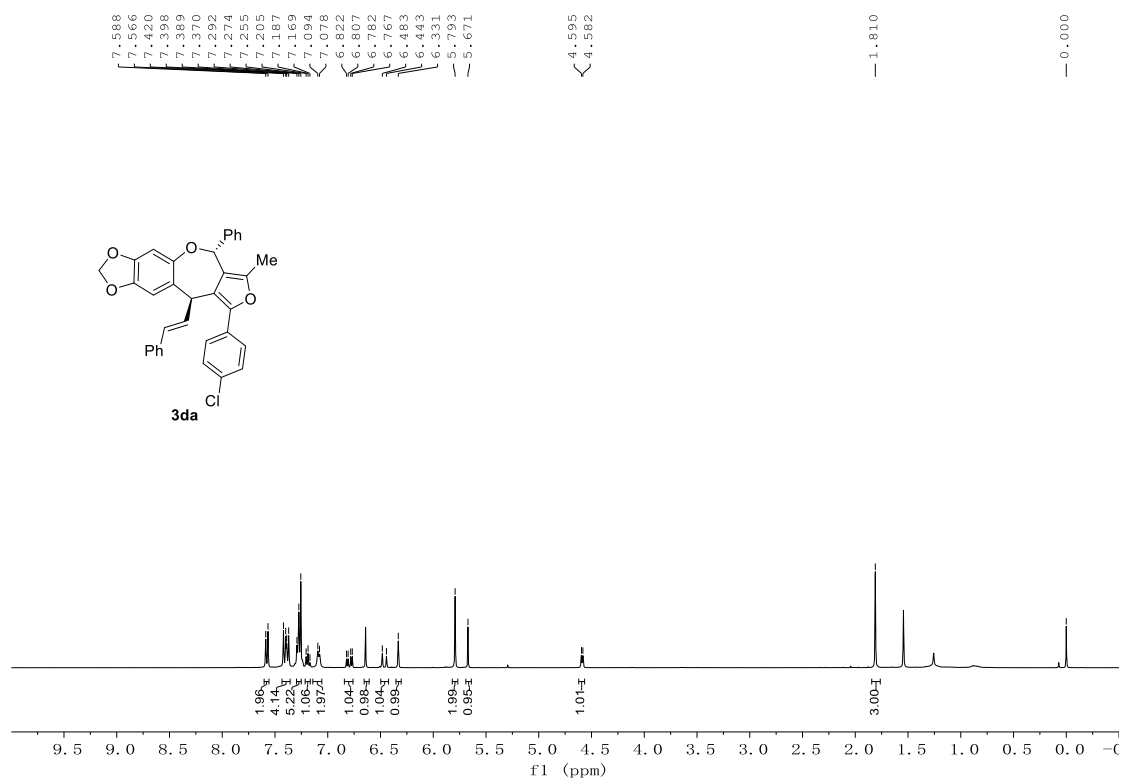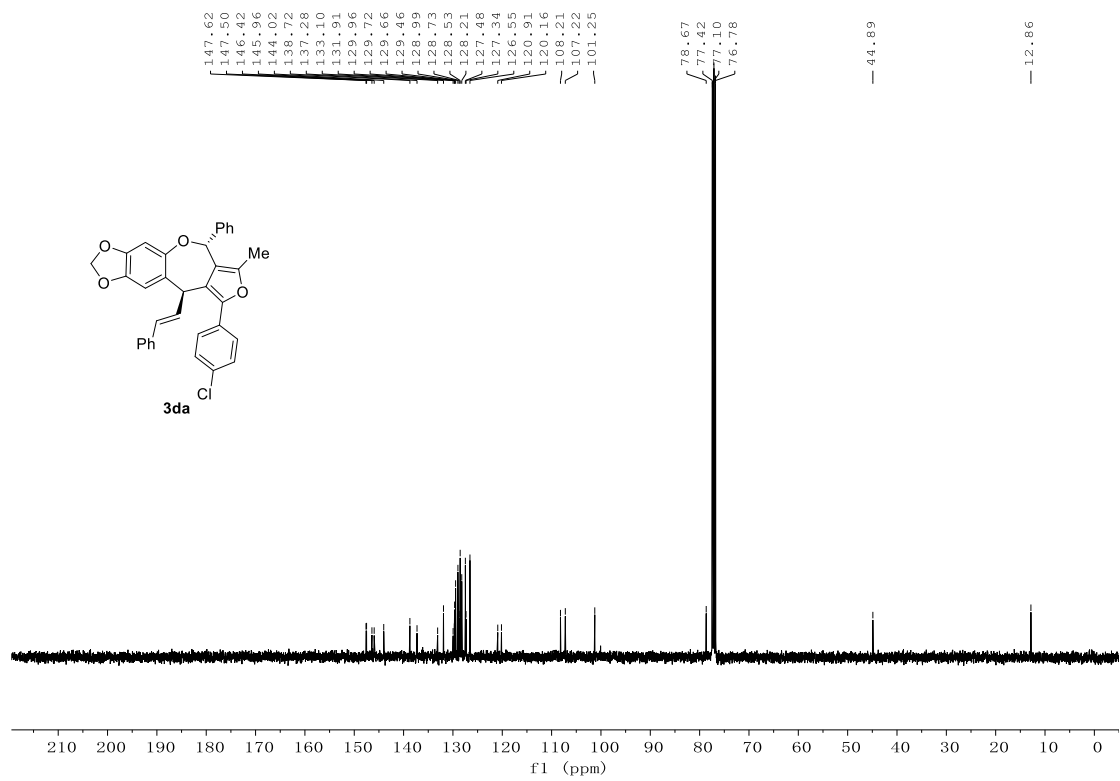

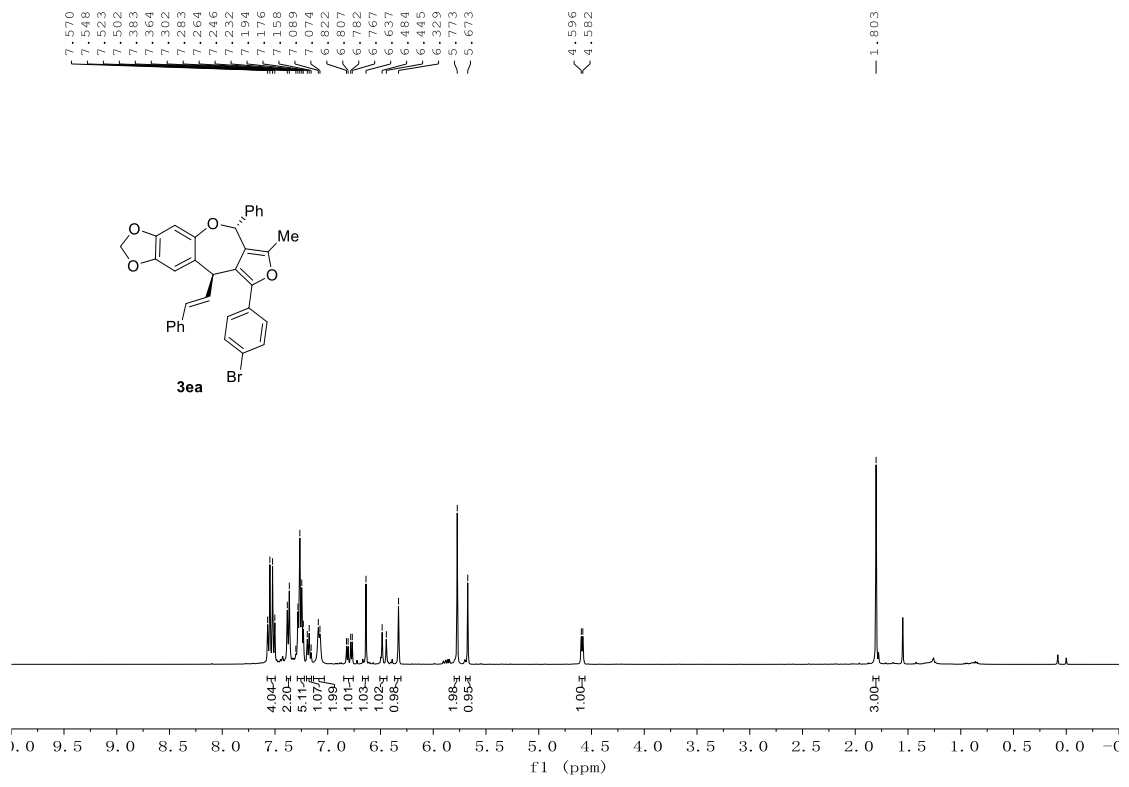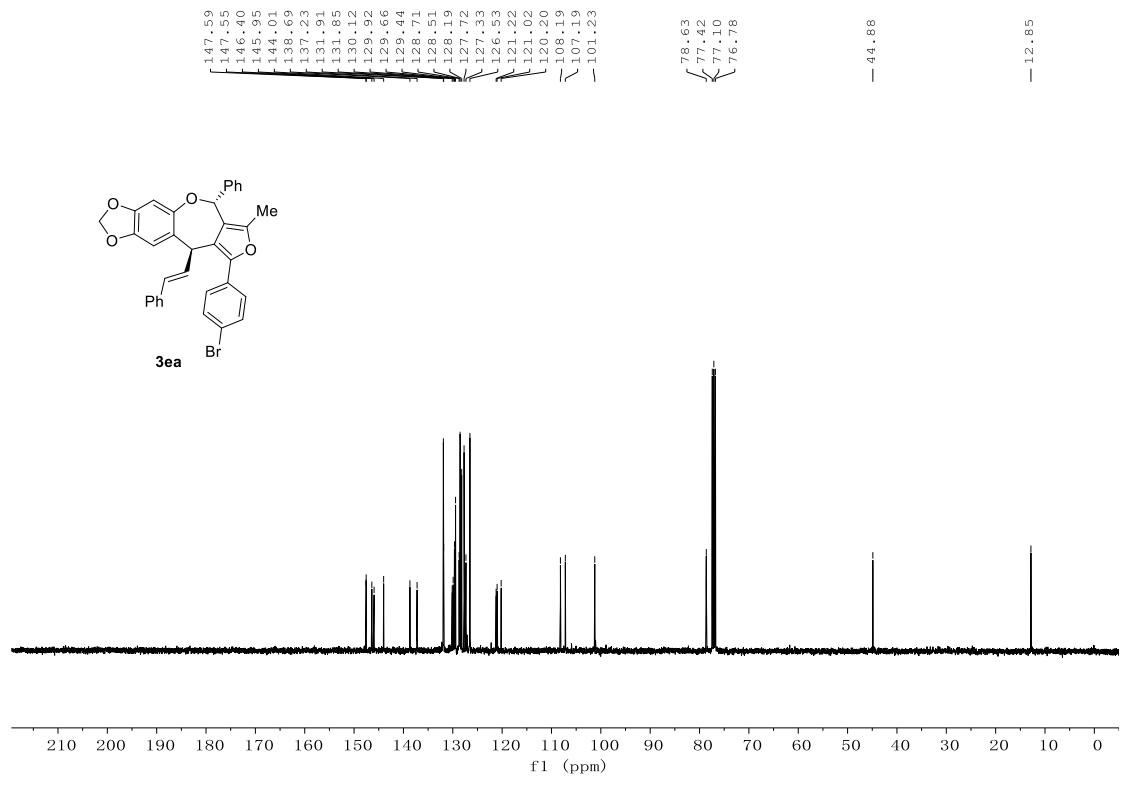

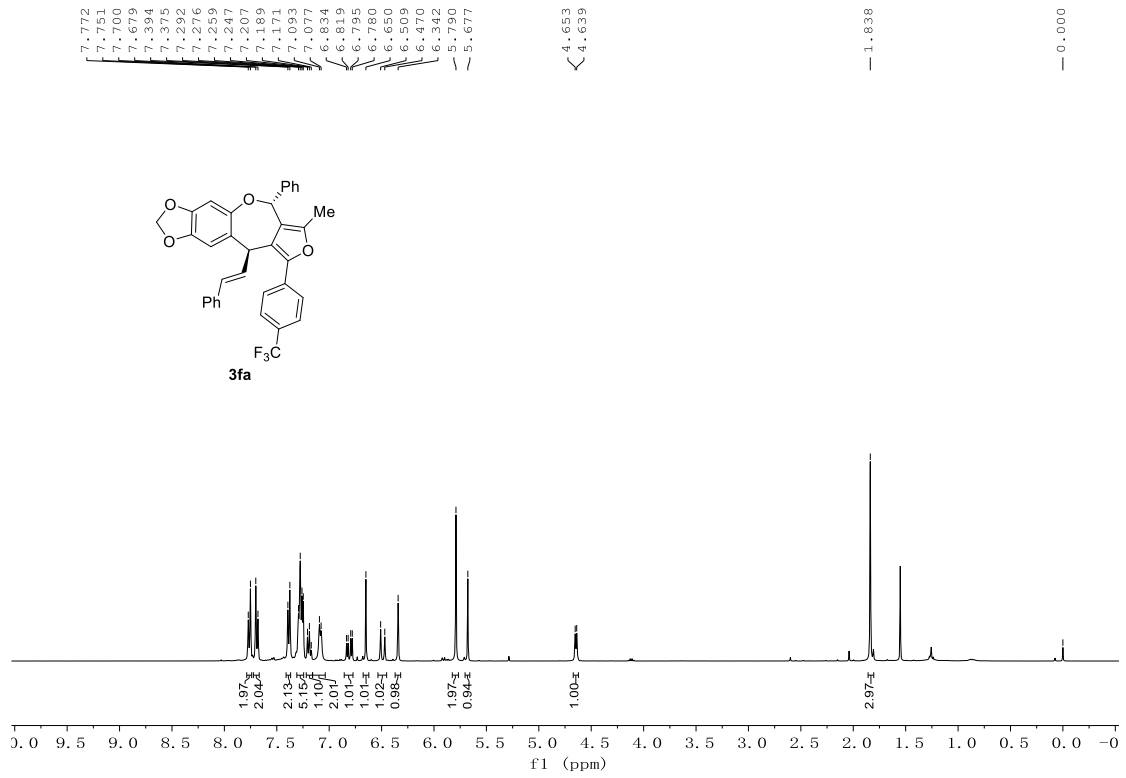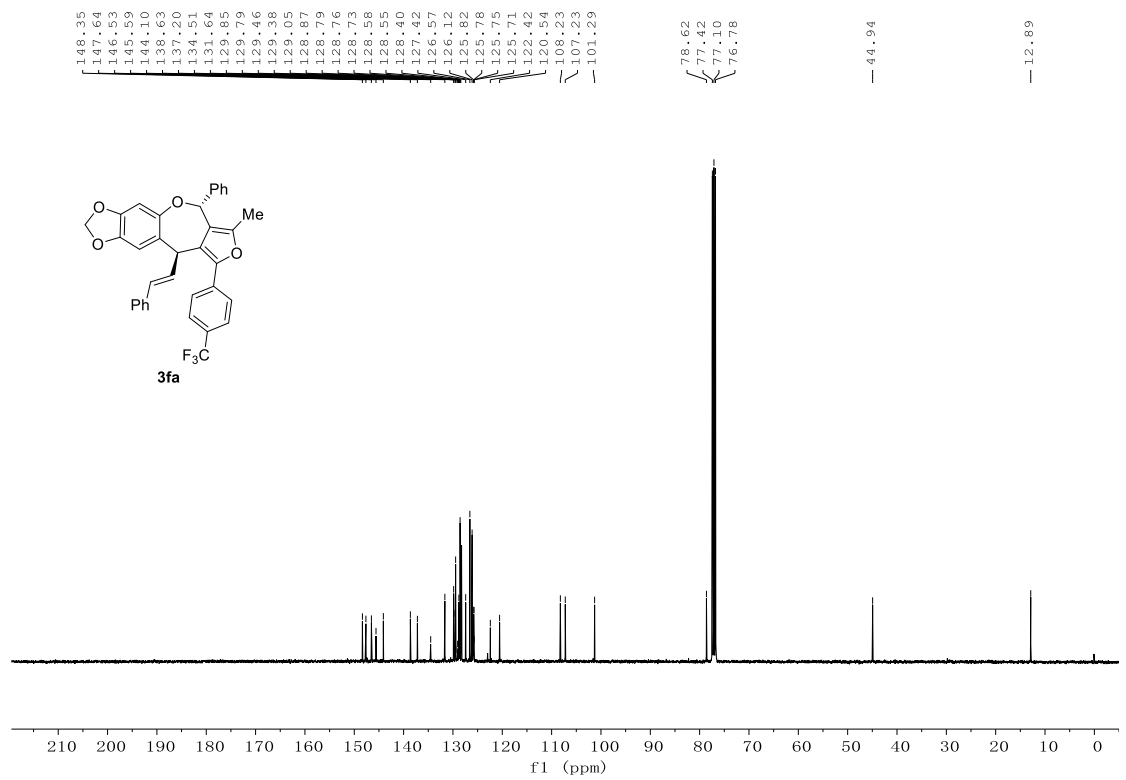

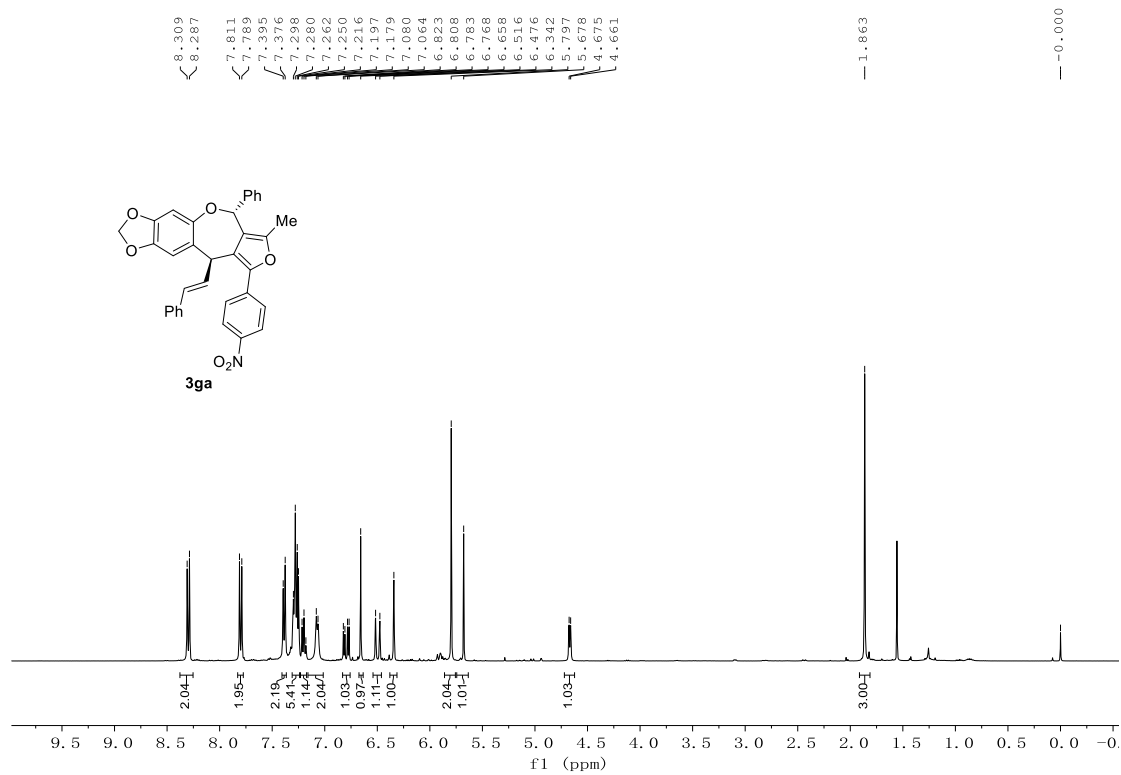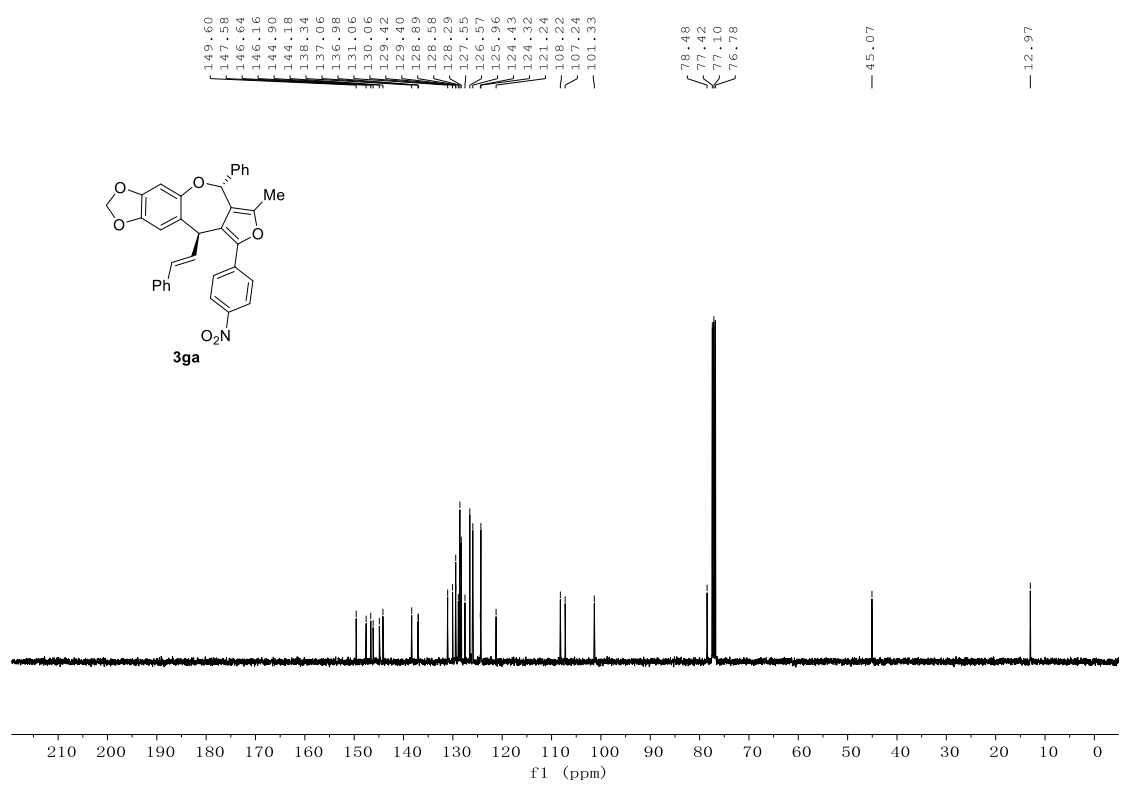



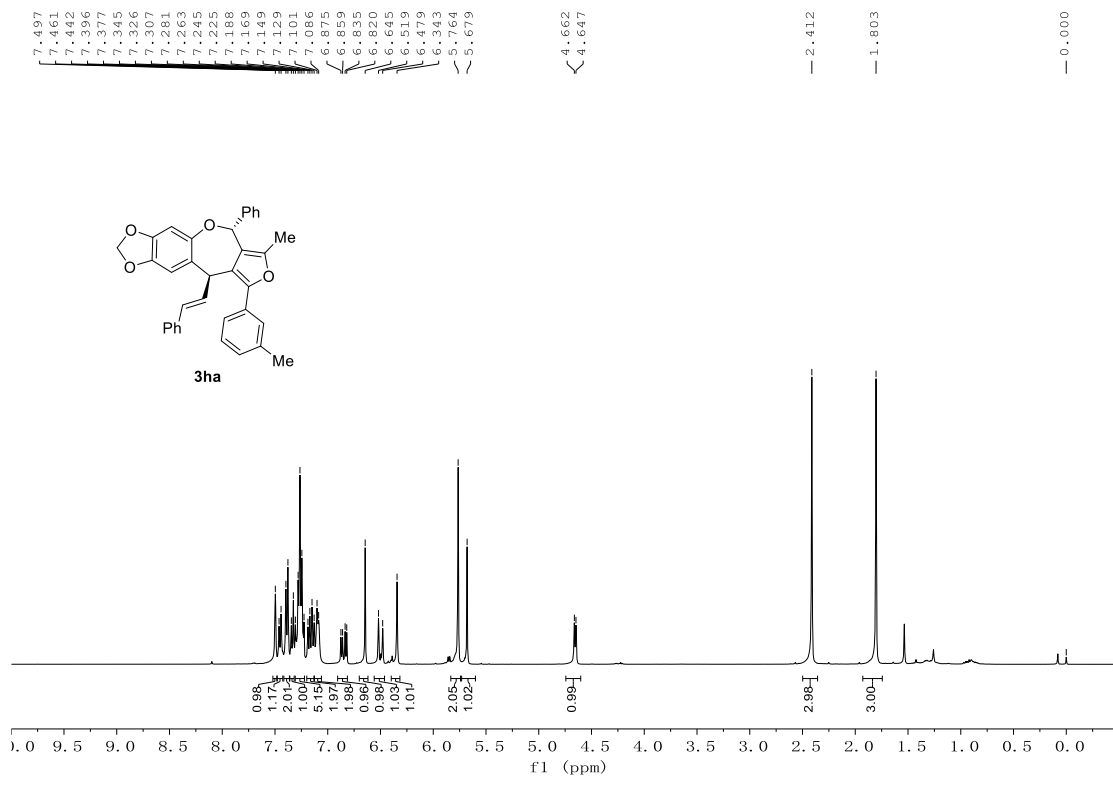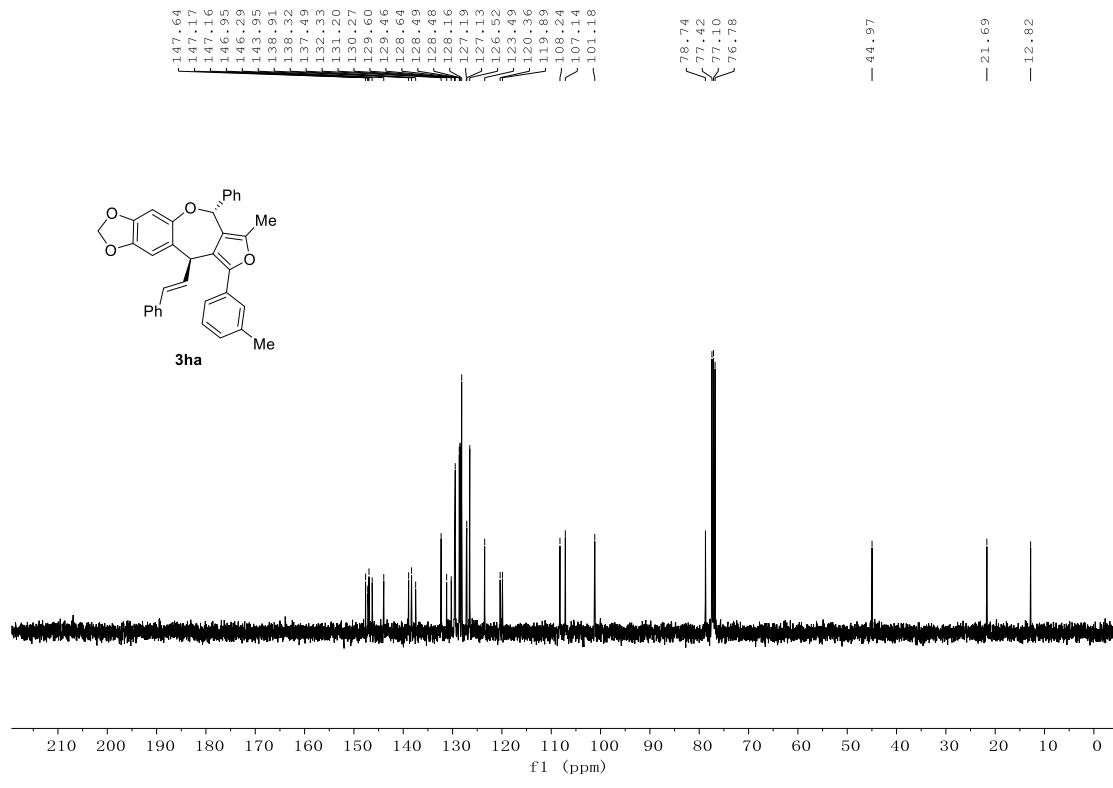

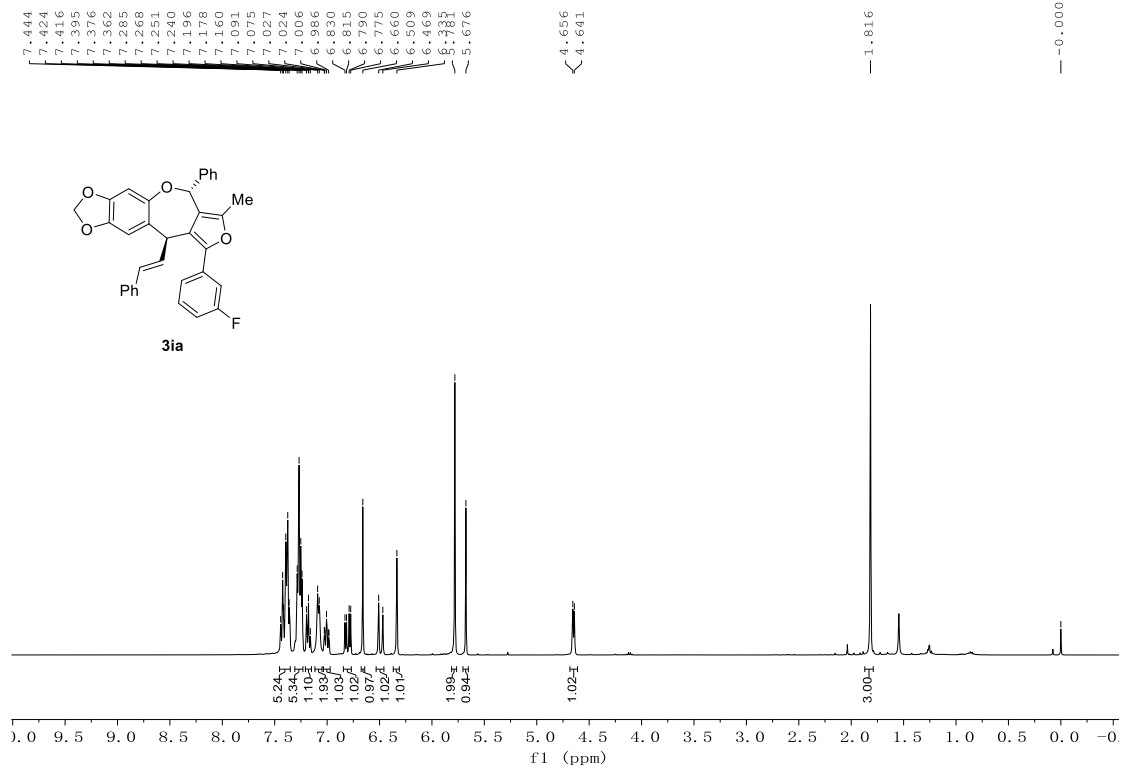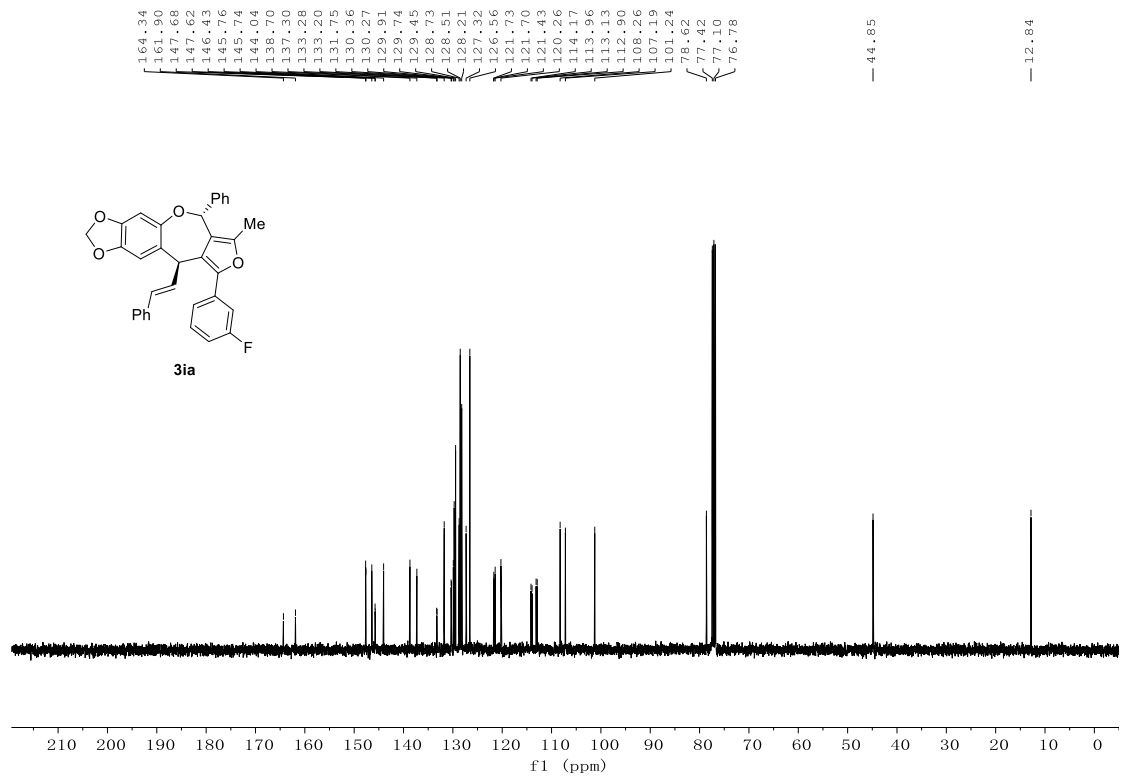

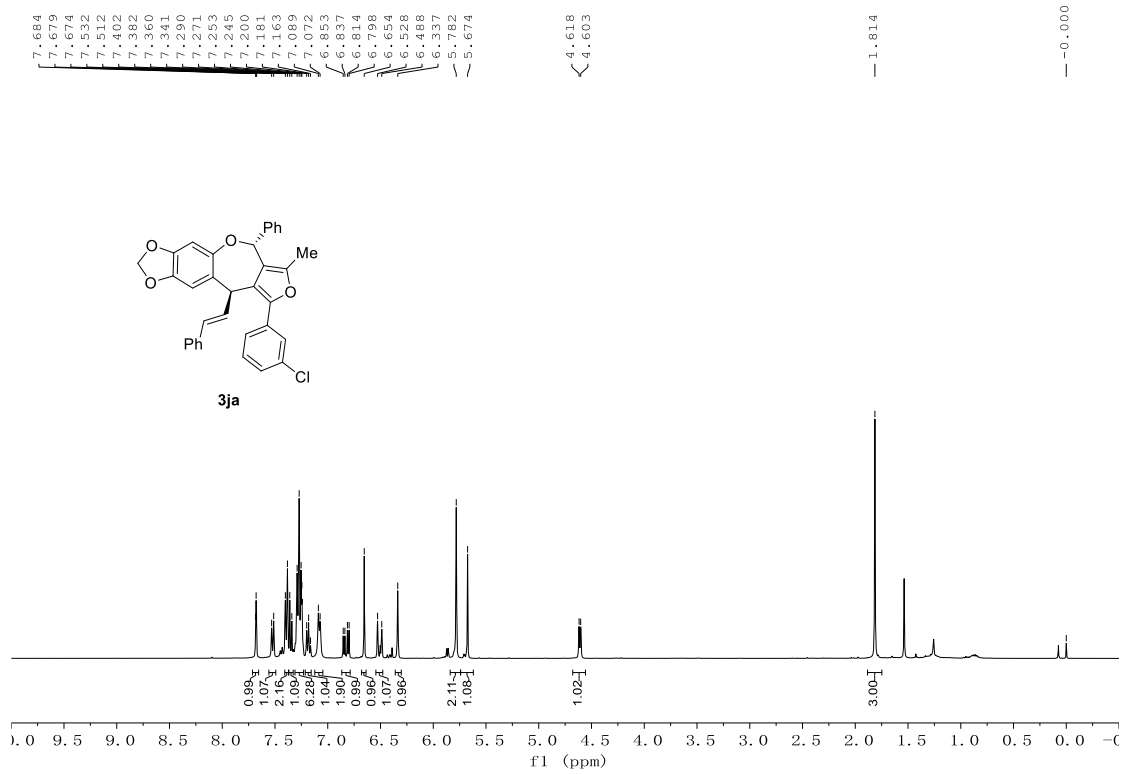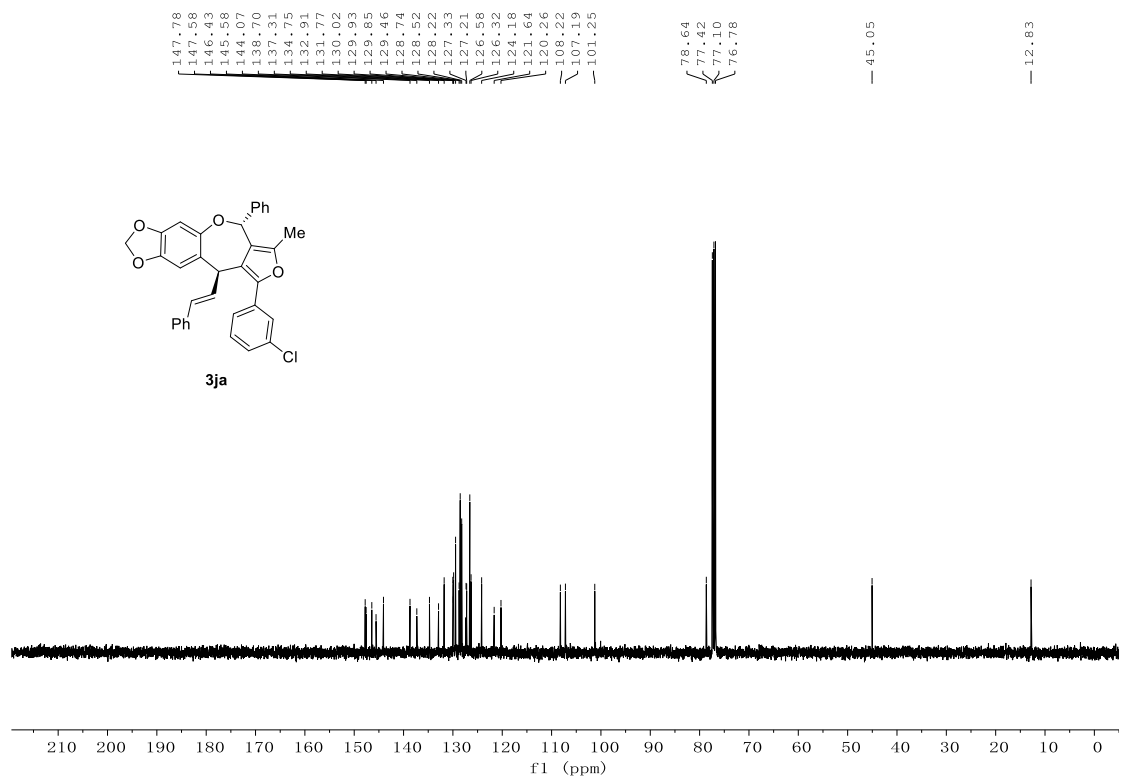

7.844  
7.574  
7.555  
7.453  
7.433  
7.412  
7.393  
7.322  
7.301  
7.296  
7.277  
7.256  
7.206  
7.188  
7.170  
7.088  
7.072  
6.865  
6.849  
6.826  
6.809  
6.654  
6.537  
6.497  
6.340  
5.790  
5.670

4.589  
4.583

1.817

0.000

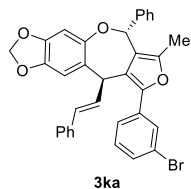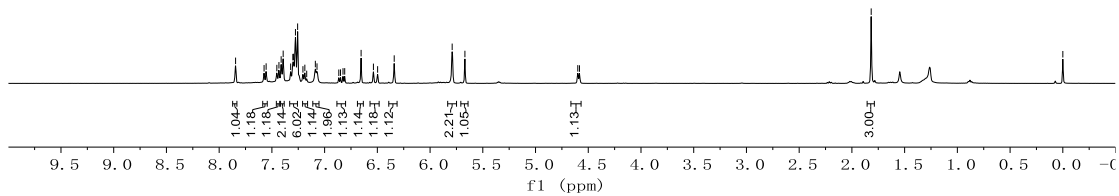

147.81  
147.53  
146.42  
145.44  
144.07  
138.67  
137.29  
133.15  
131.74  
130.27  
130.10  
129.96  
129.87  
129.46  
129.24  
128.75  
128.52  
128.22  
127.34  
126.58  
124.62  
122.90  
121.68  
120.24  
108.20  
107.19  
101.25

45.12

12.84

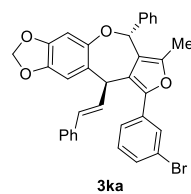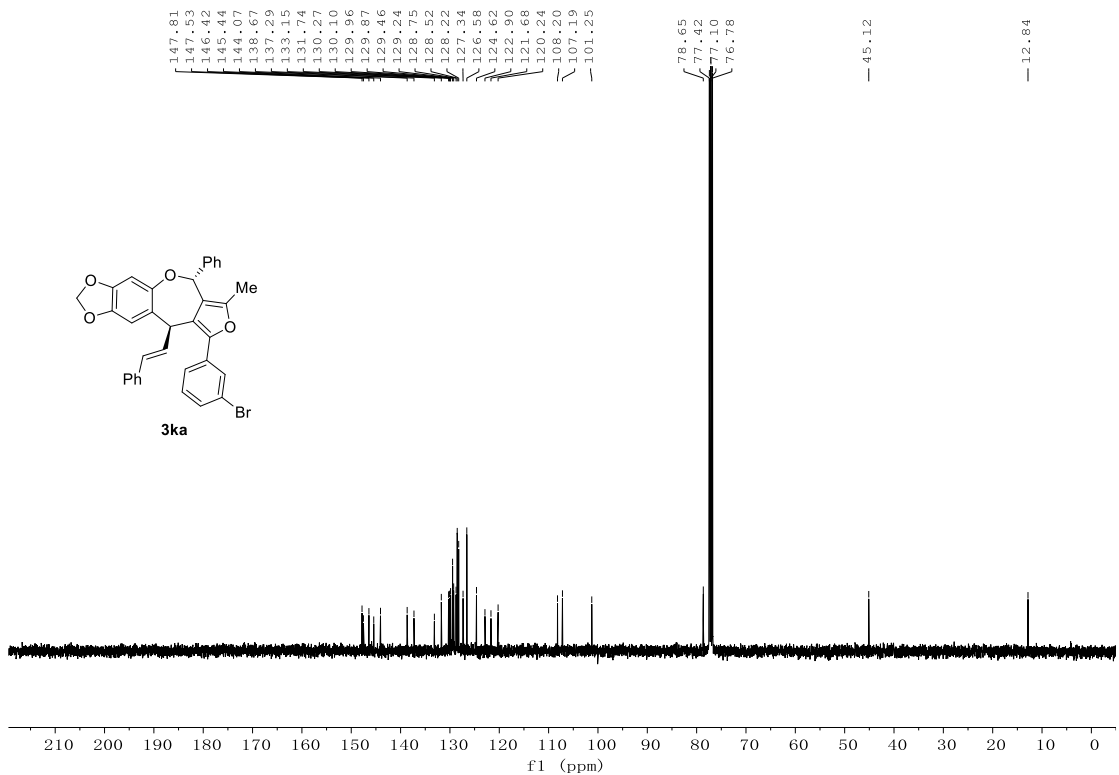

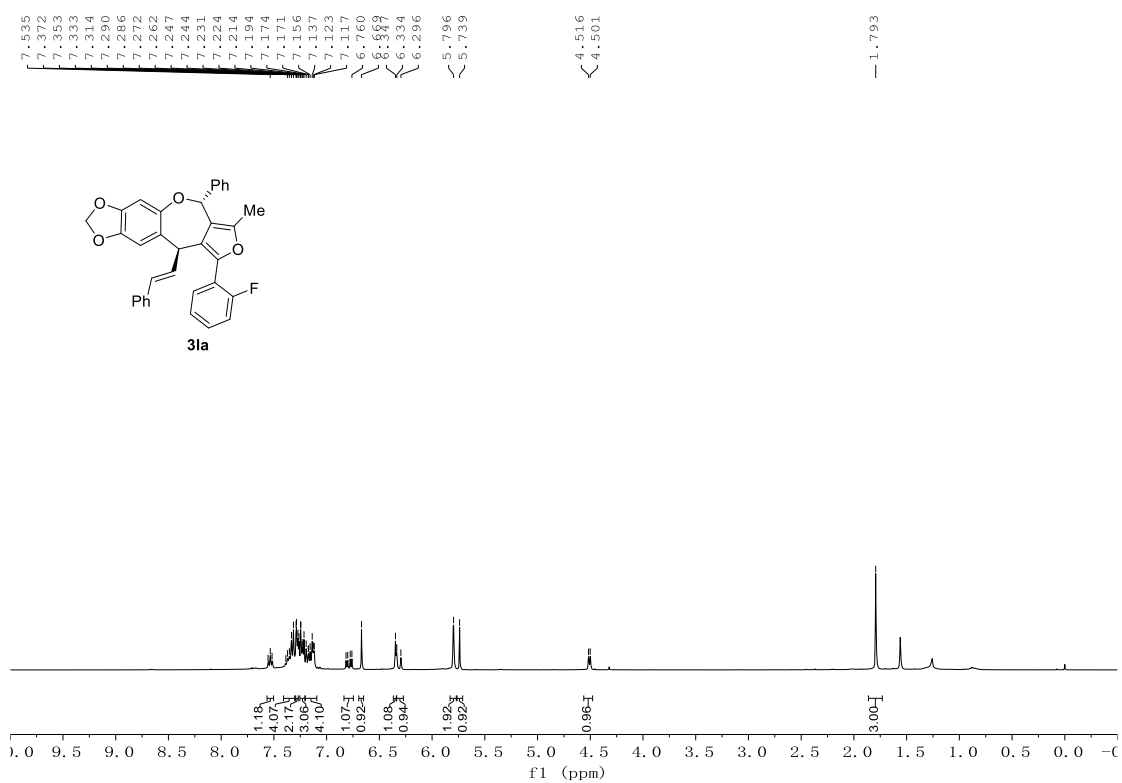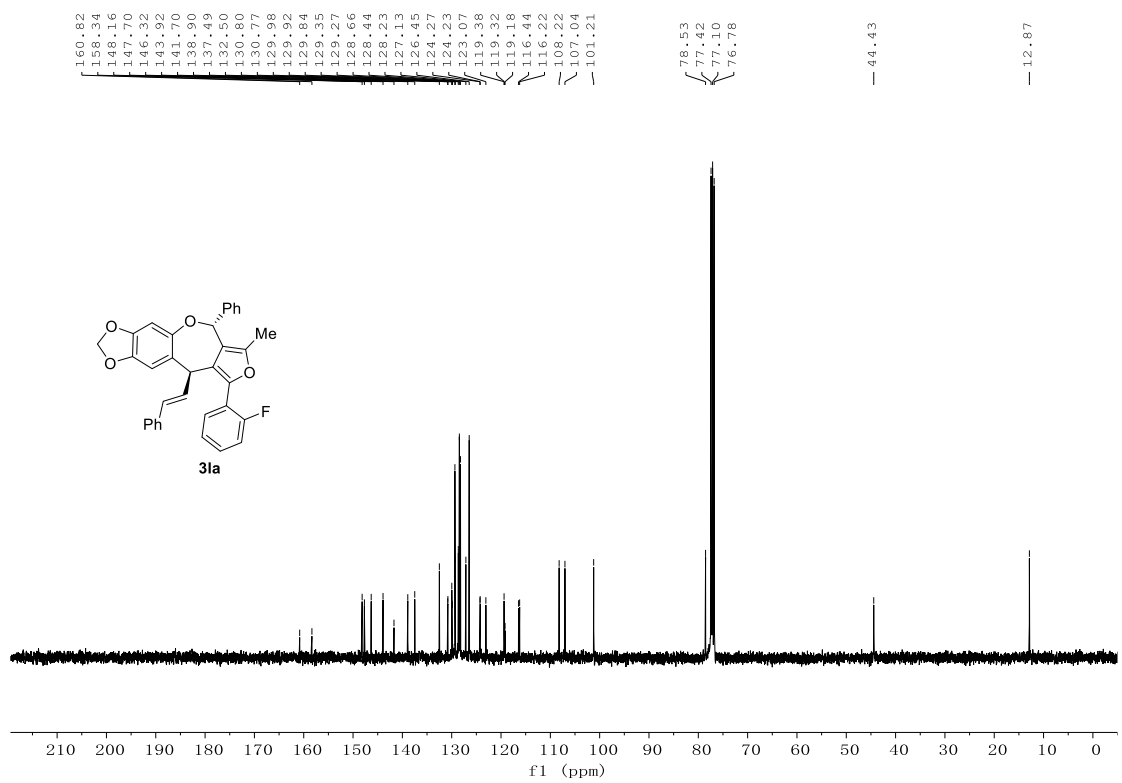

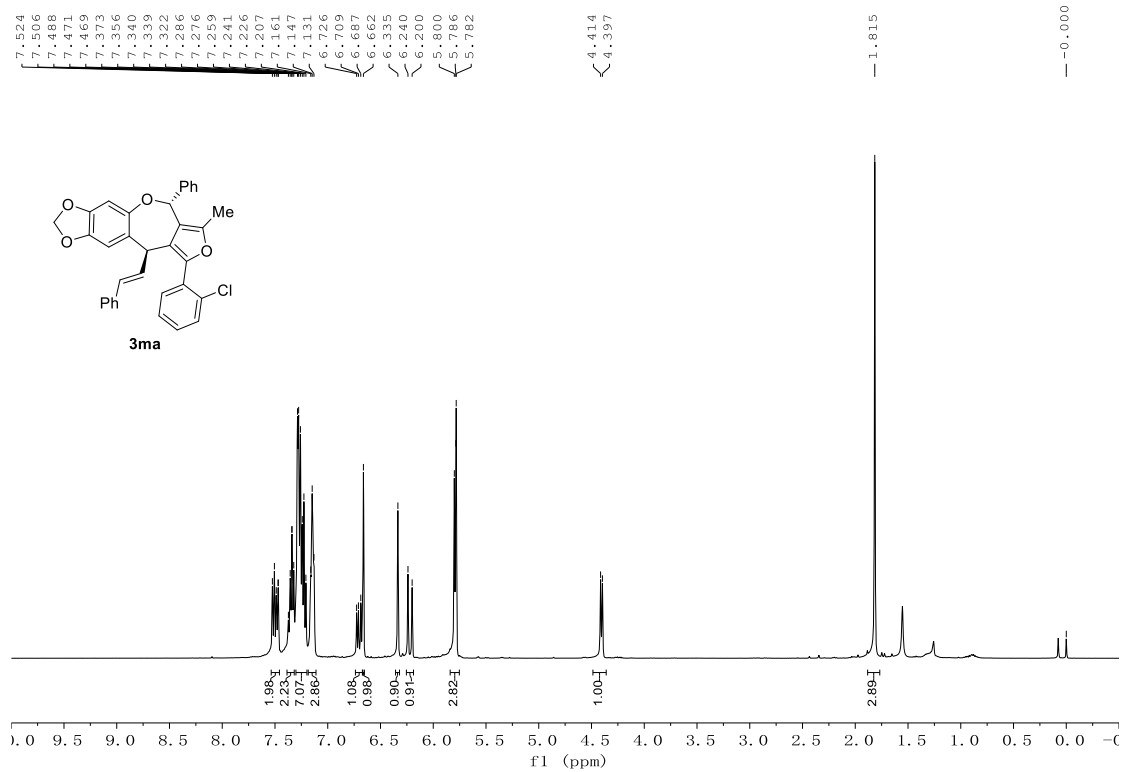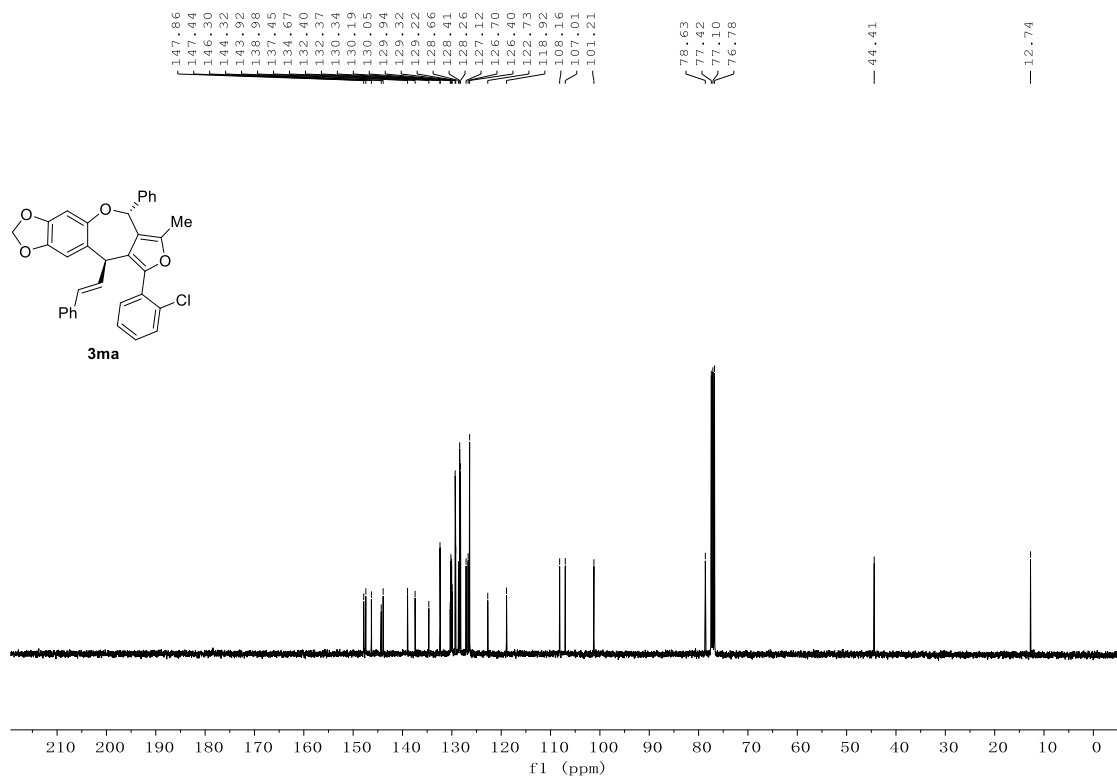

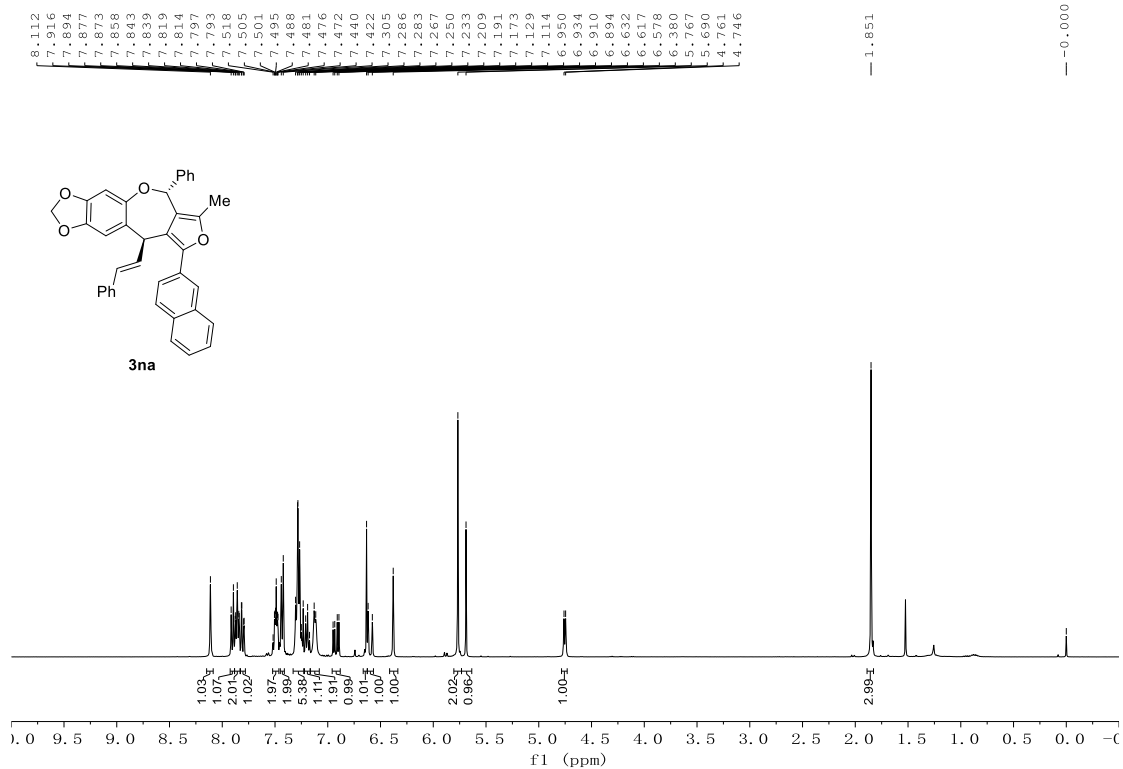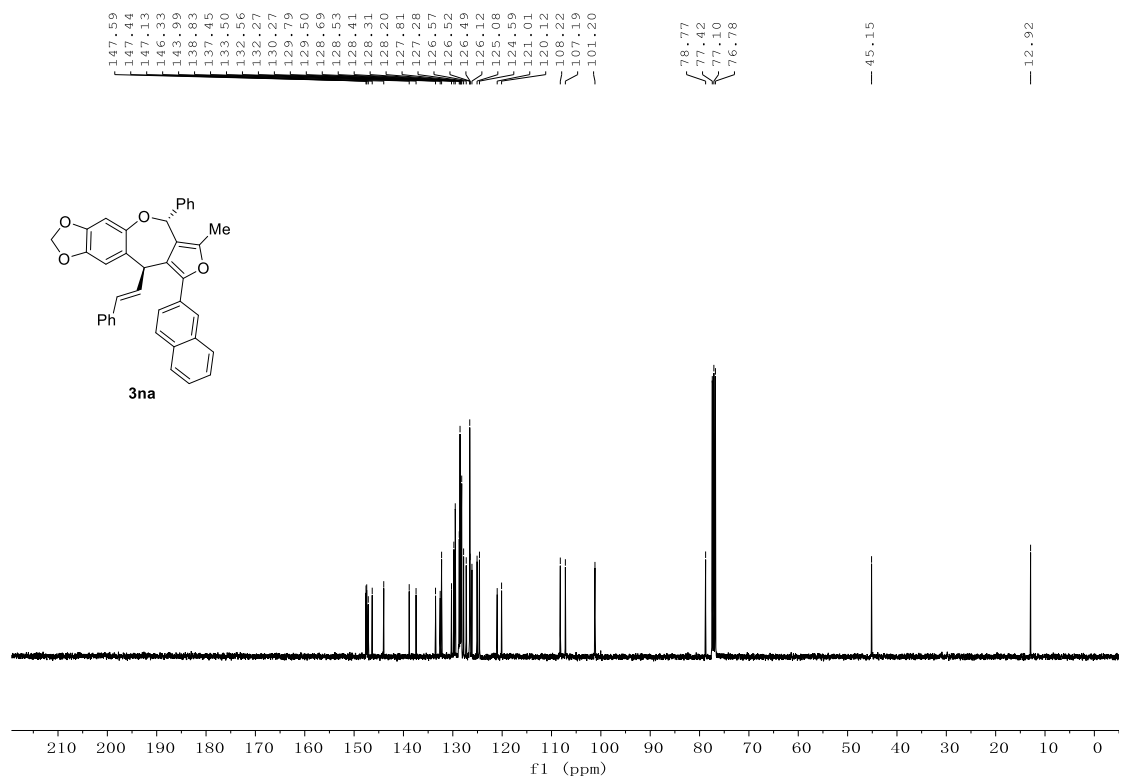

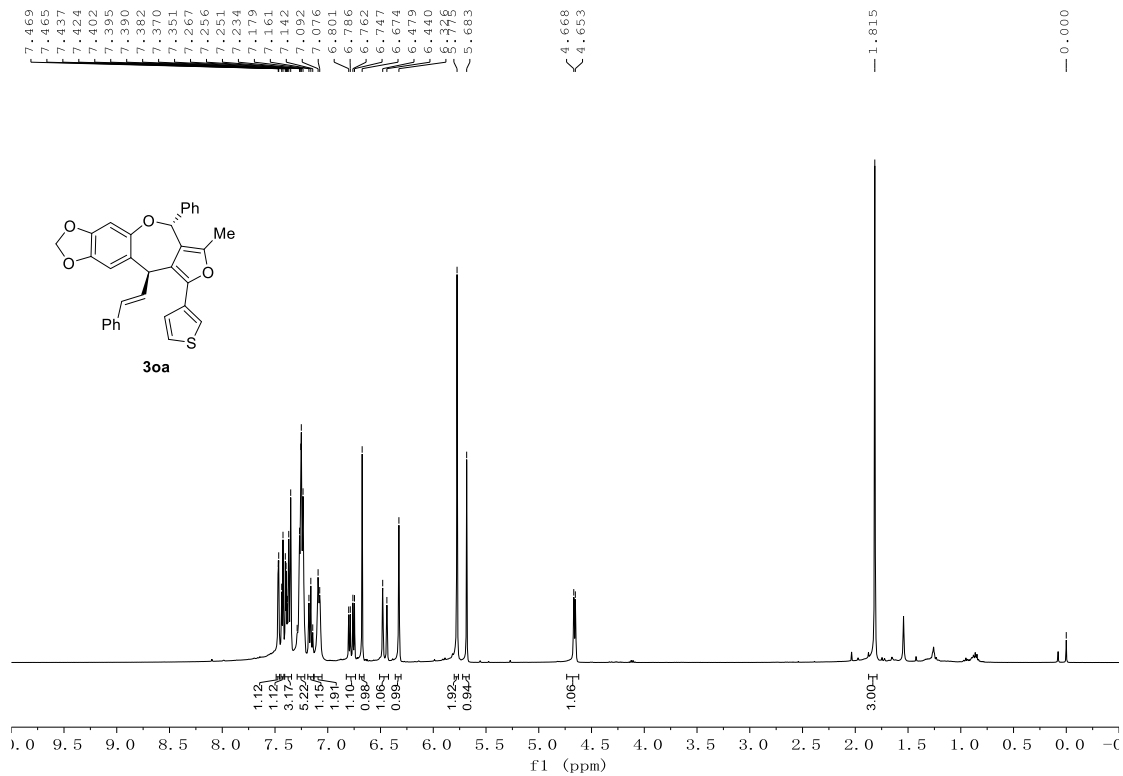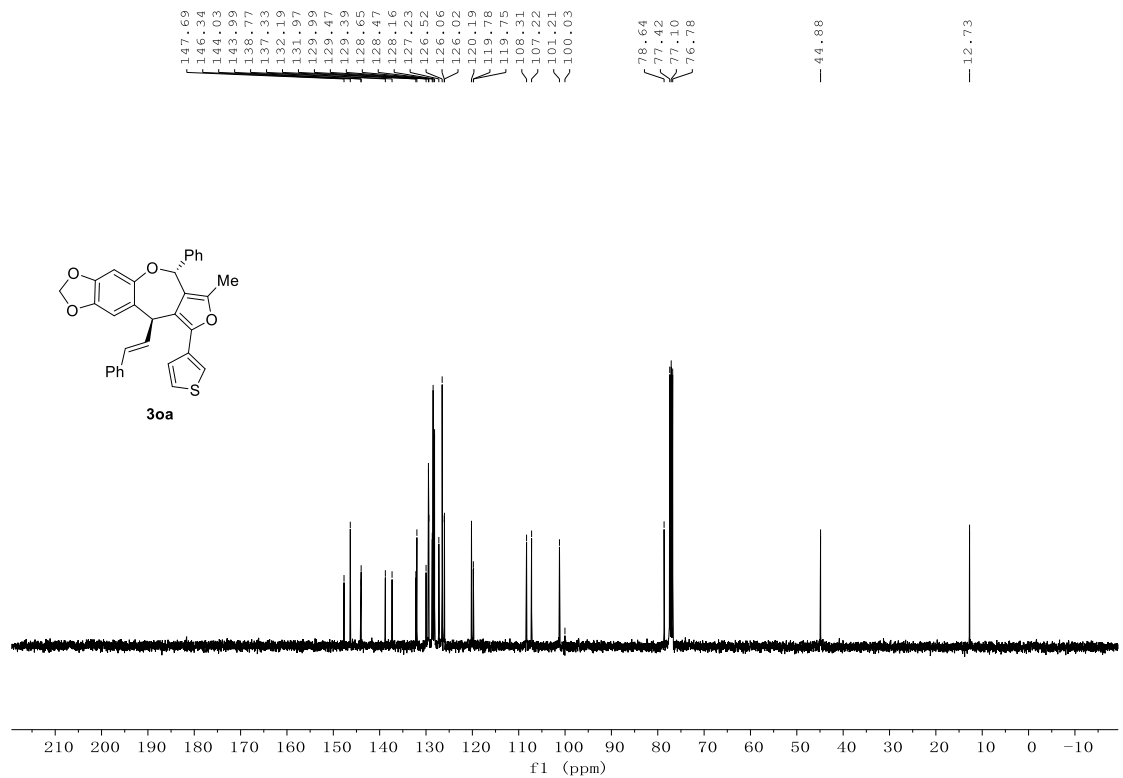



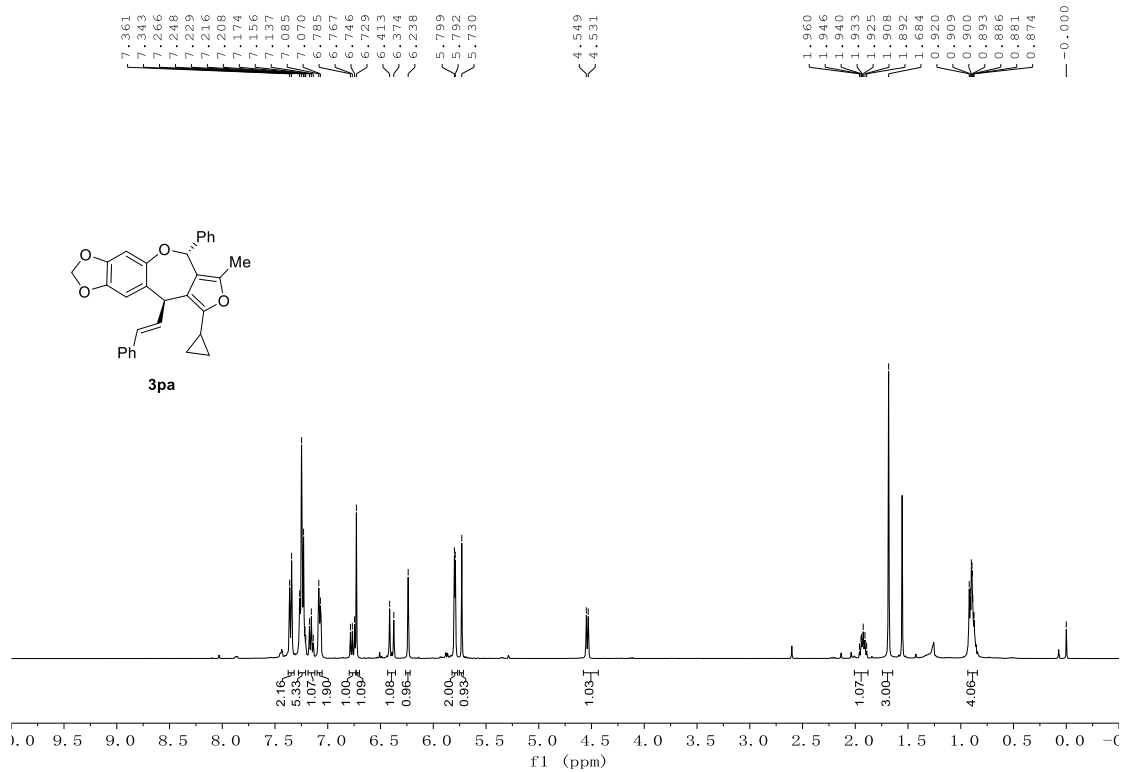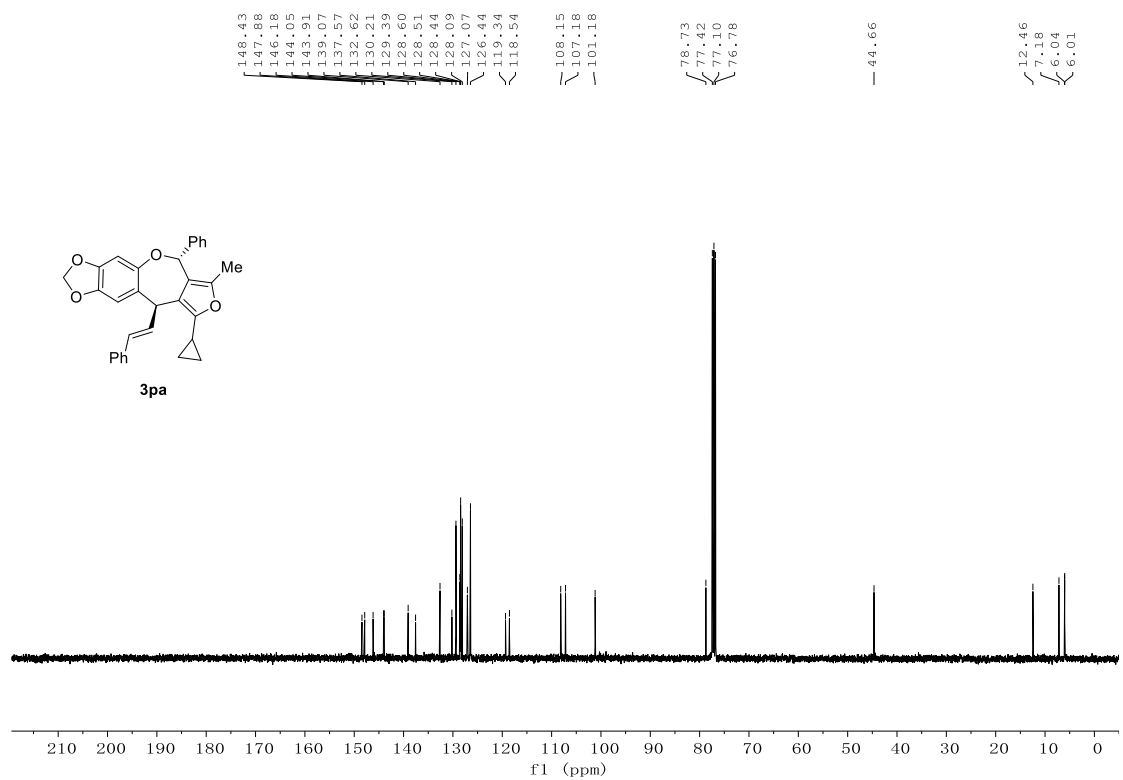

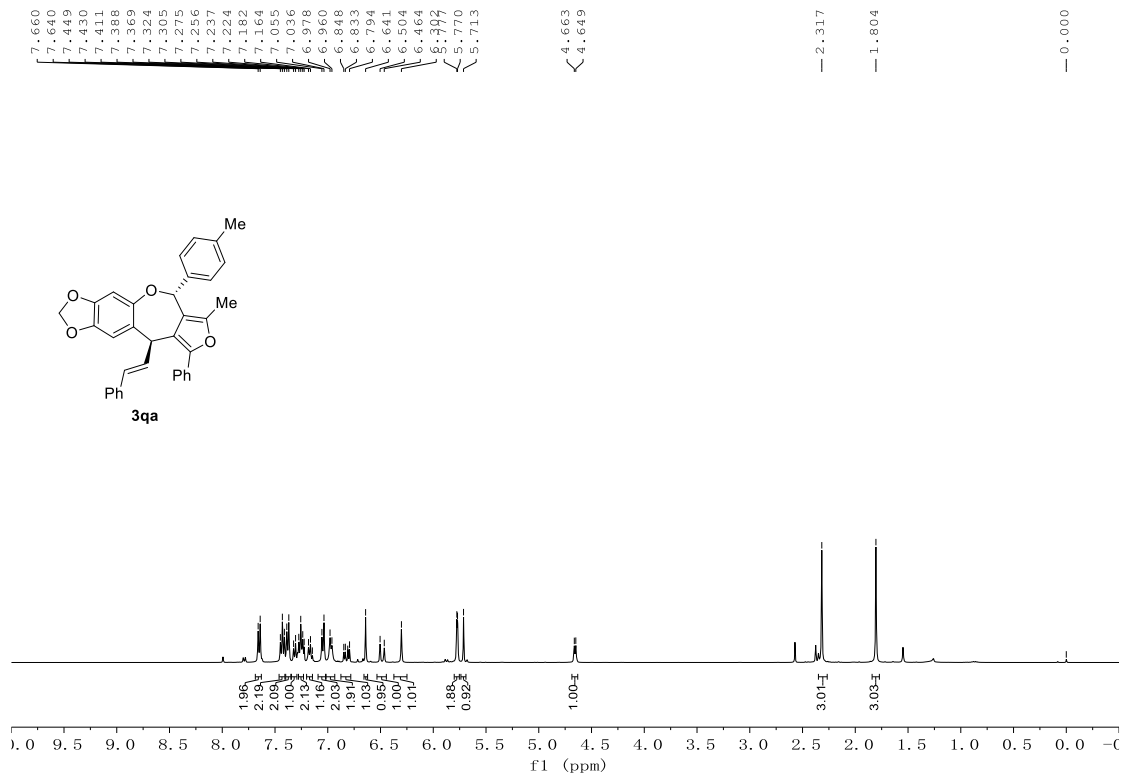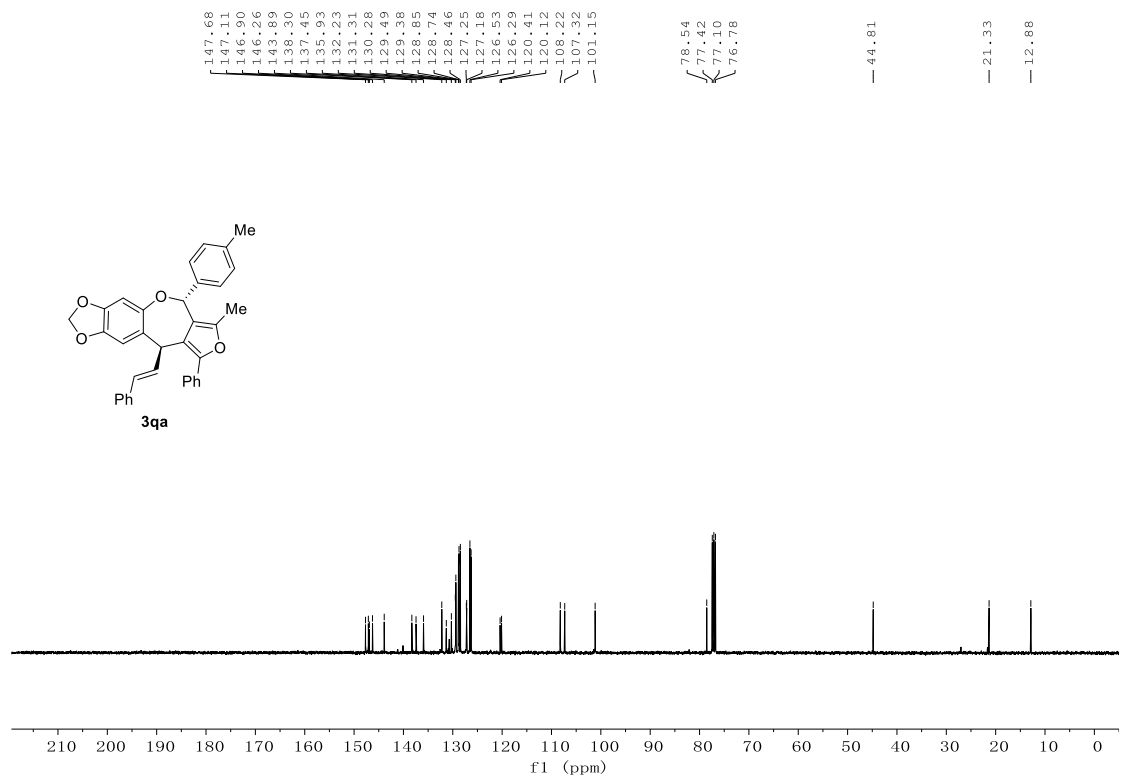

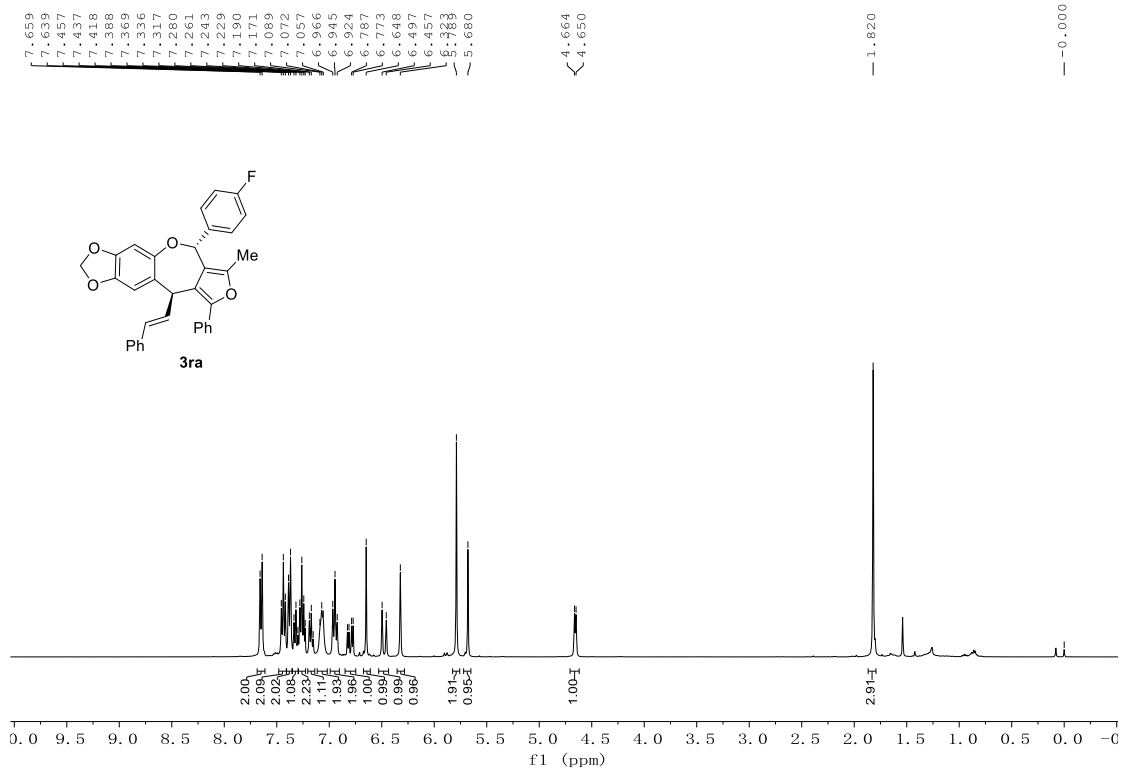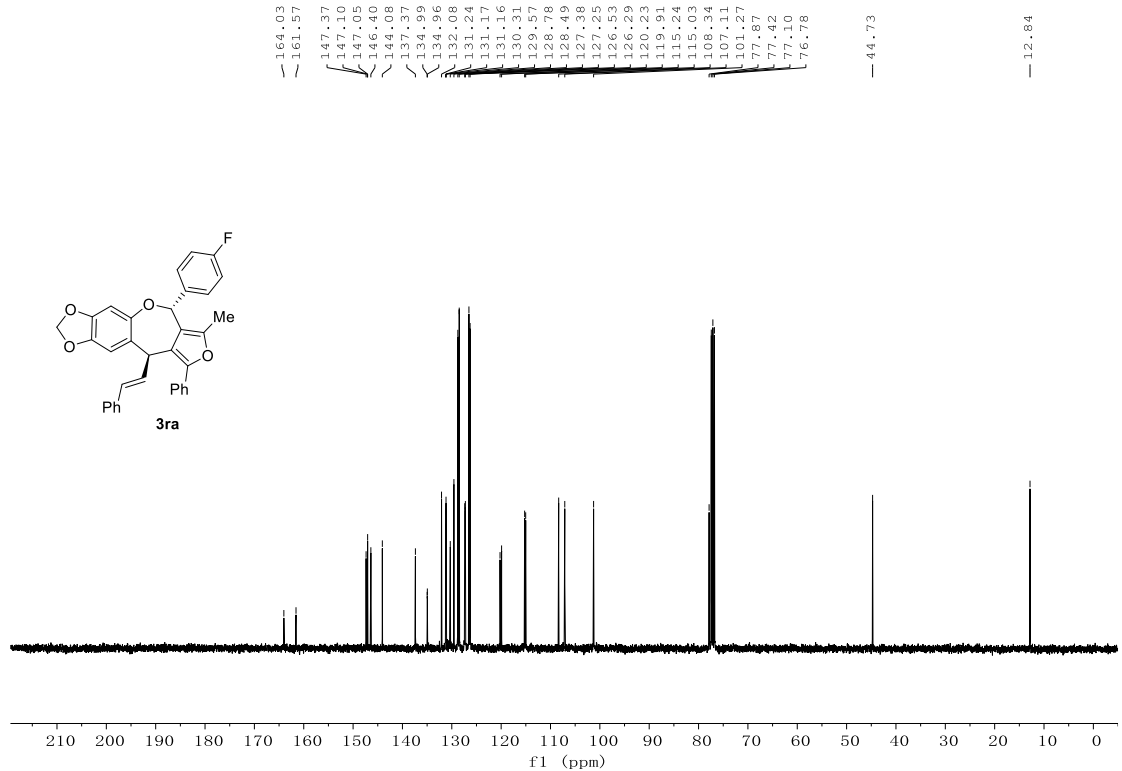

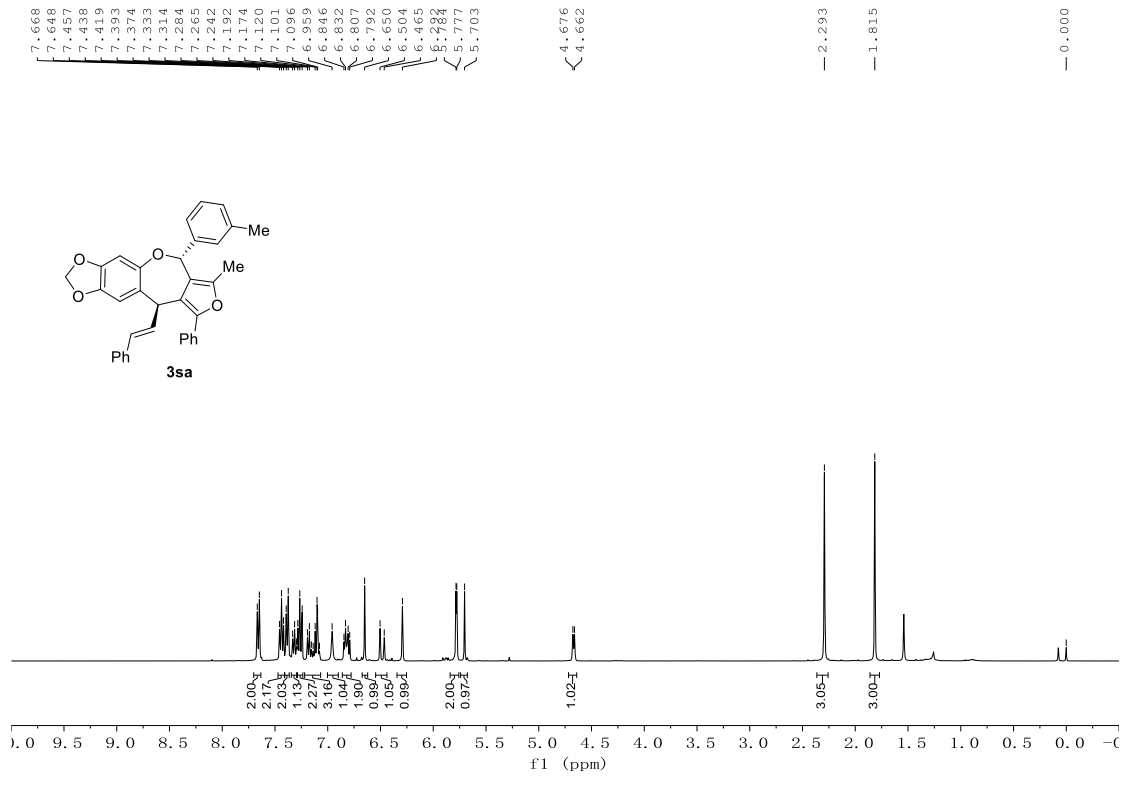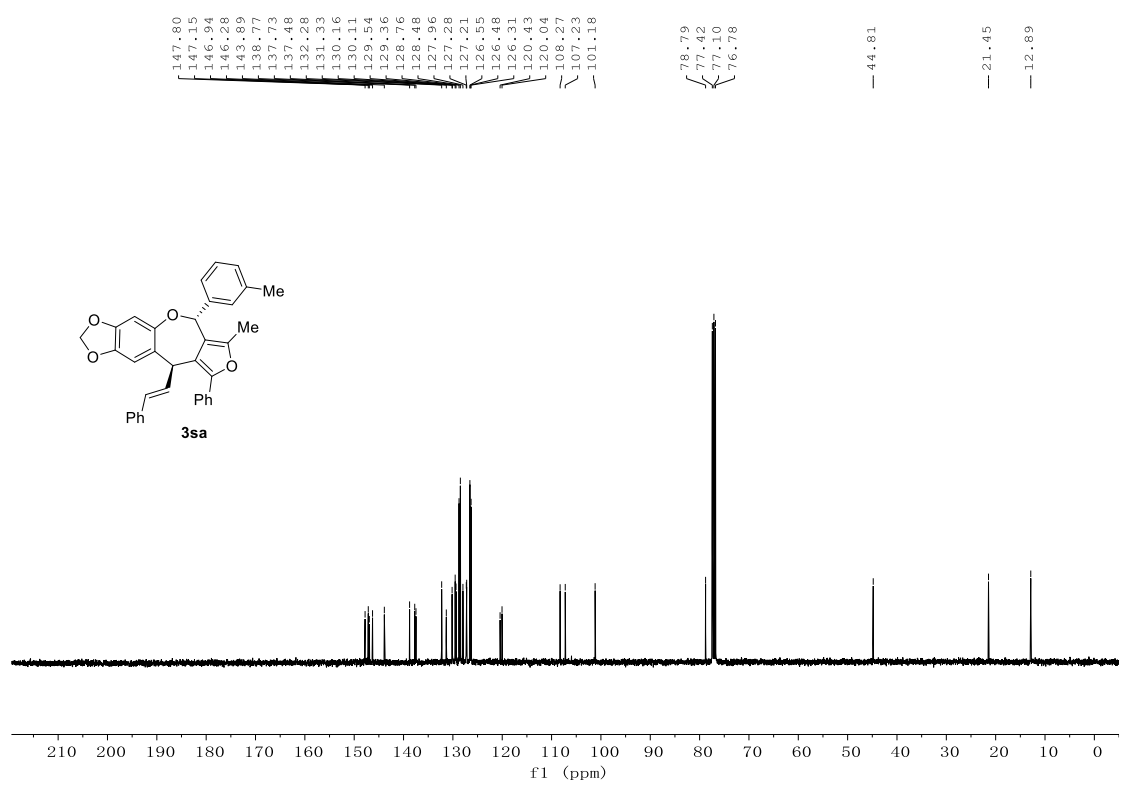

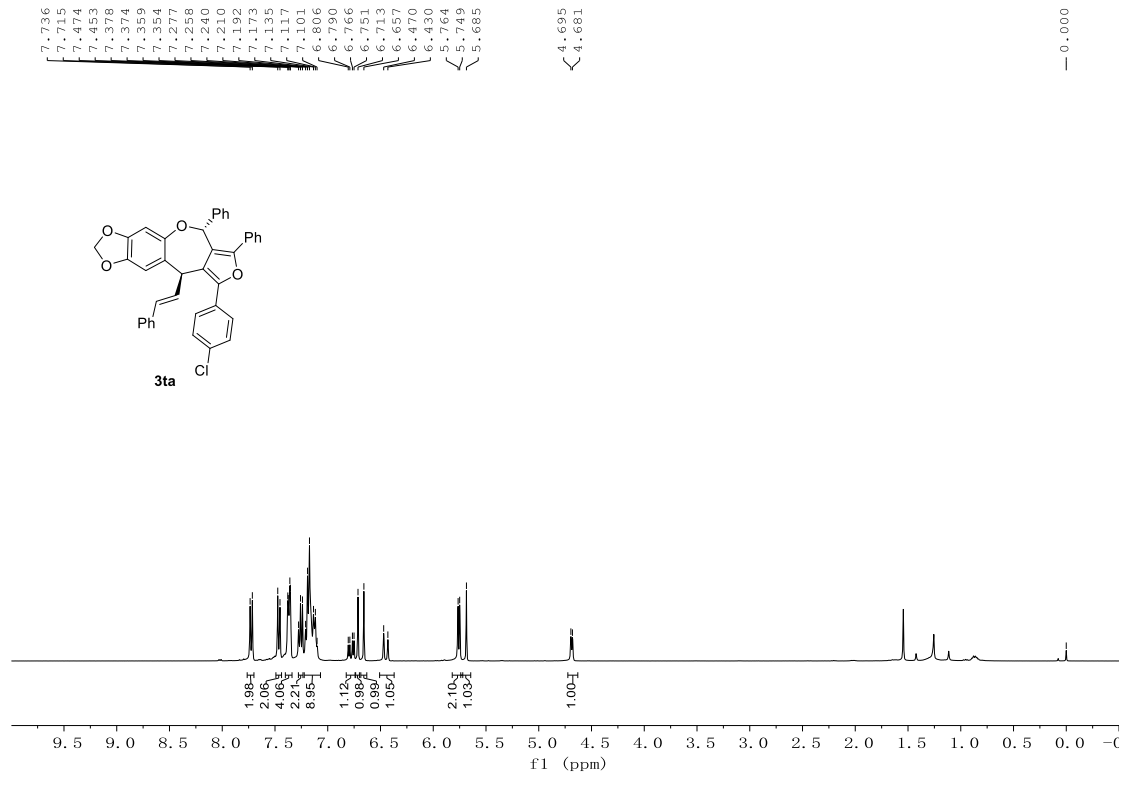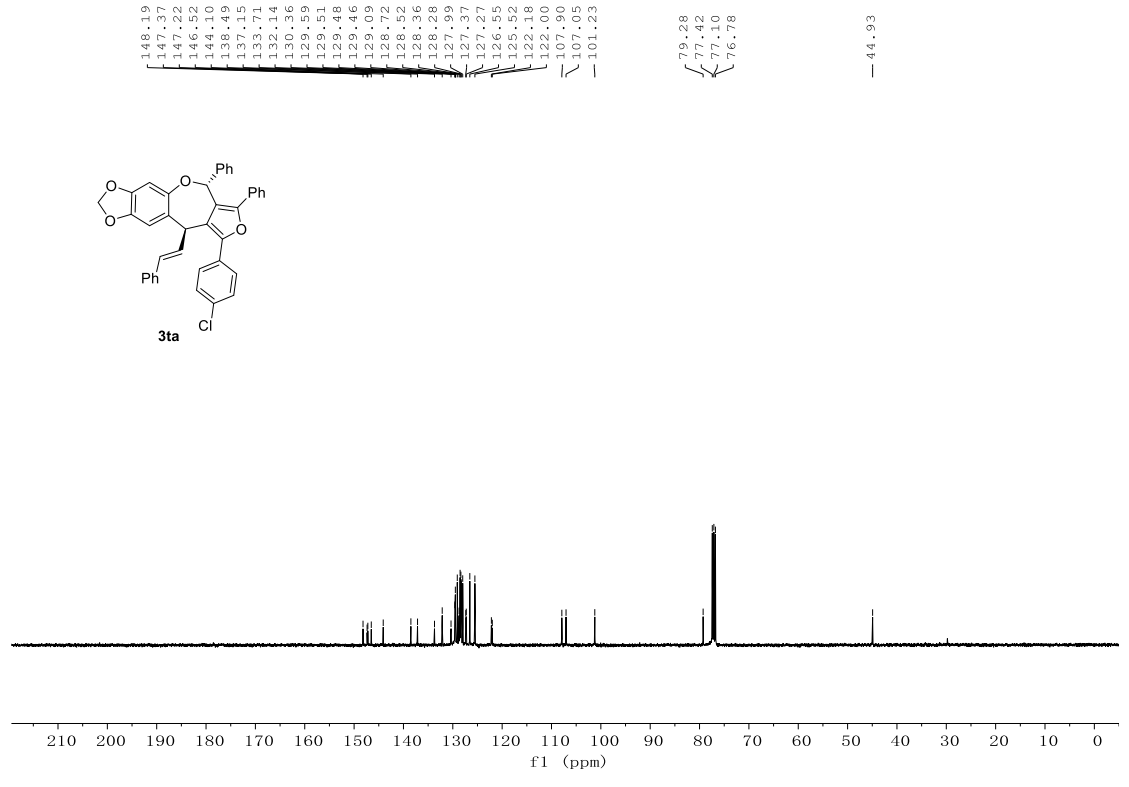

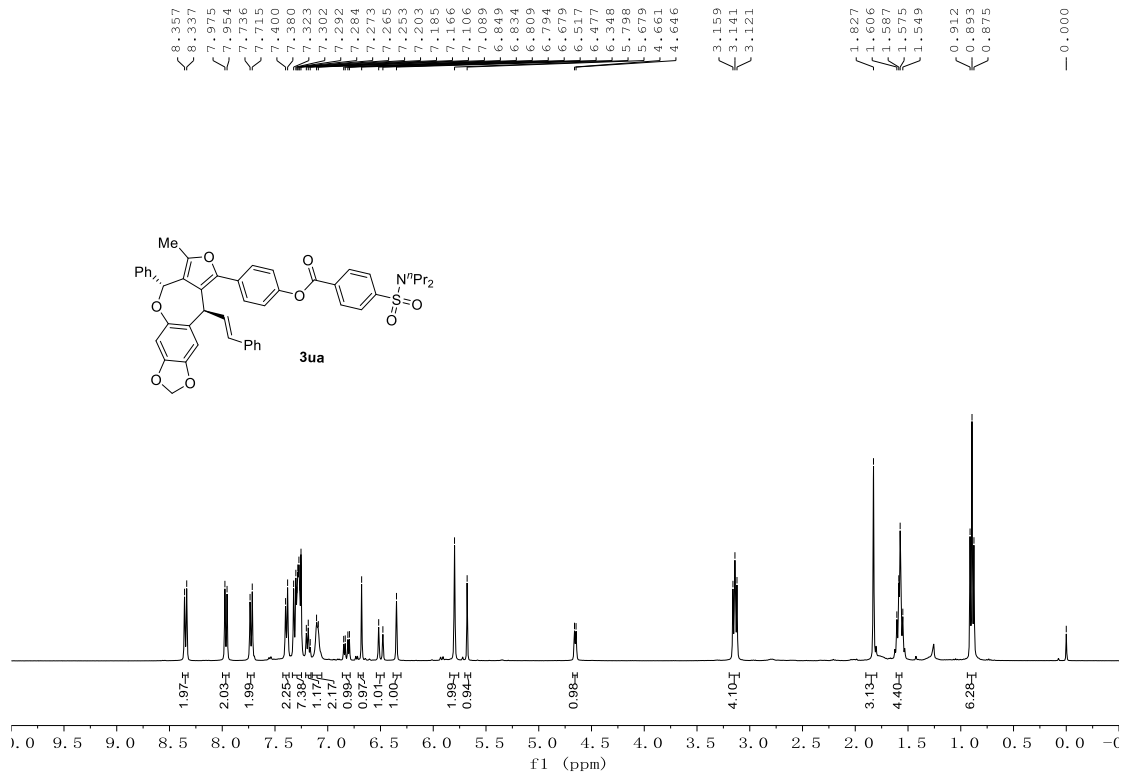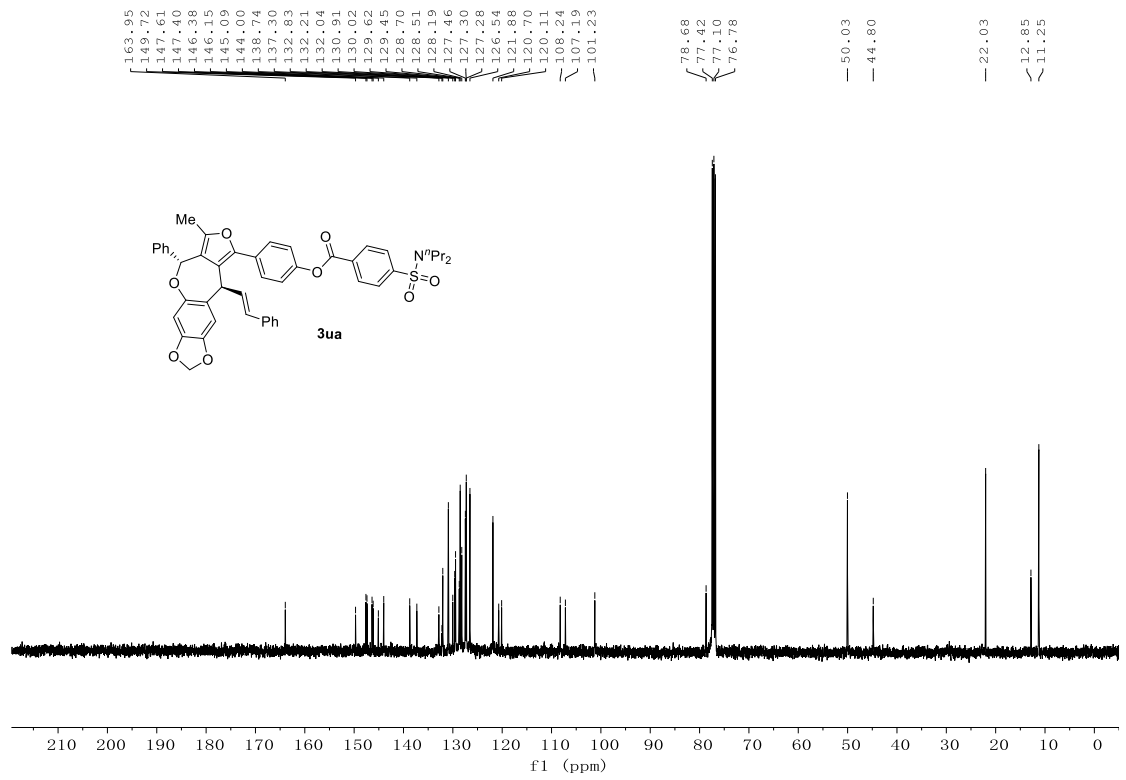

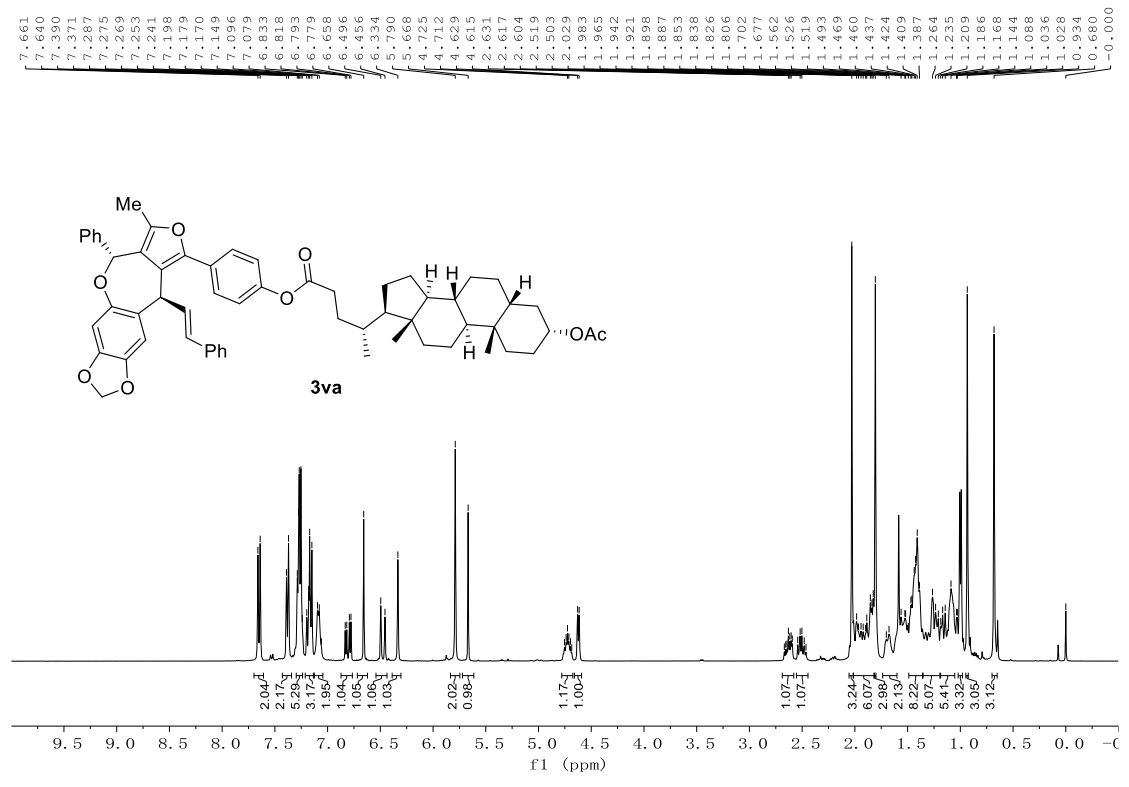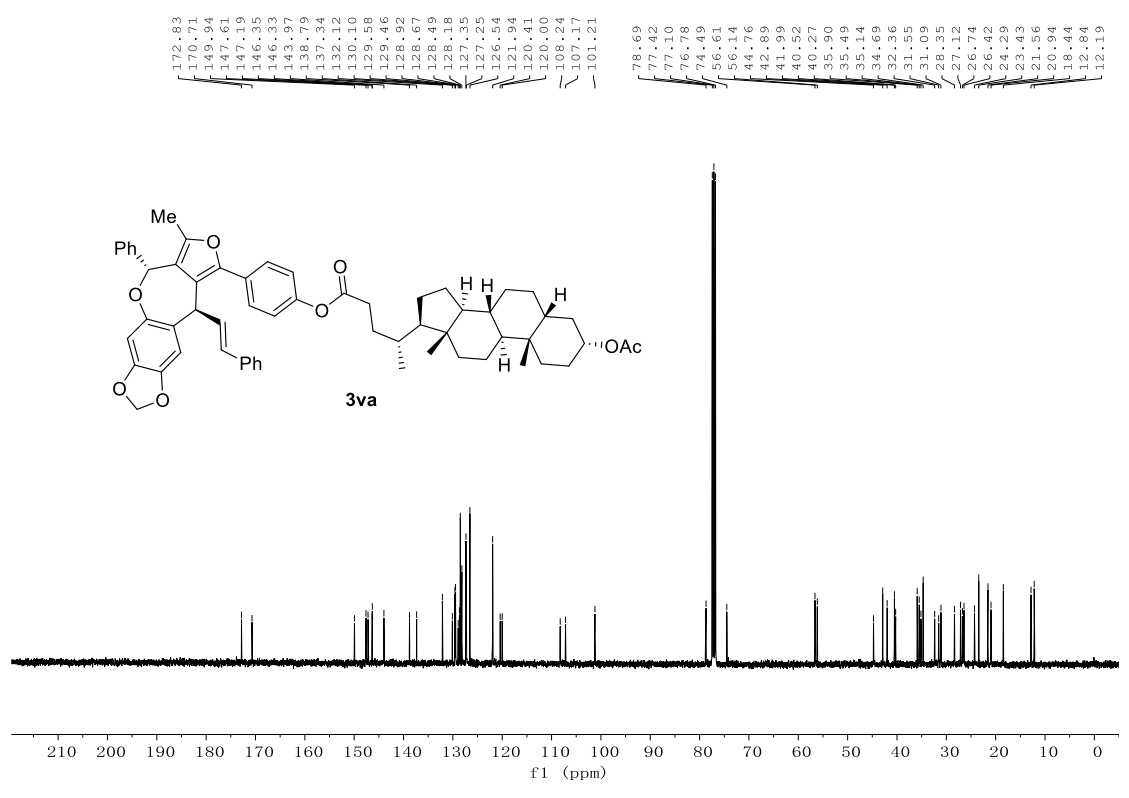

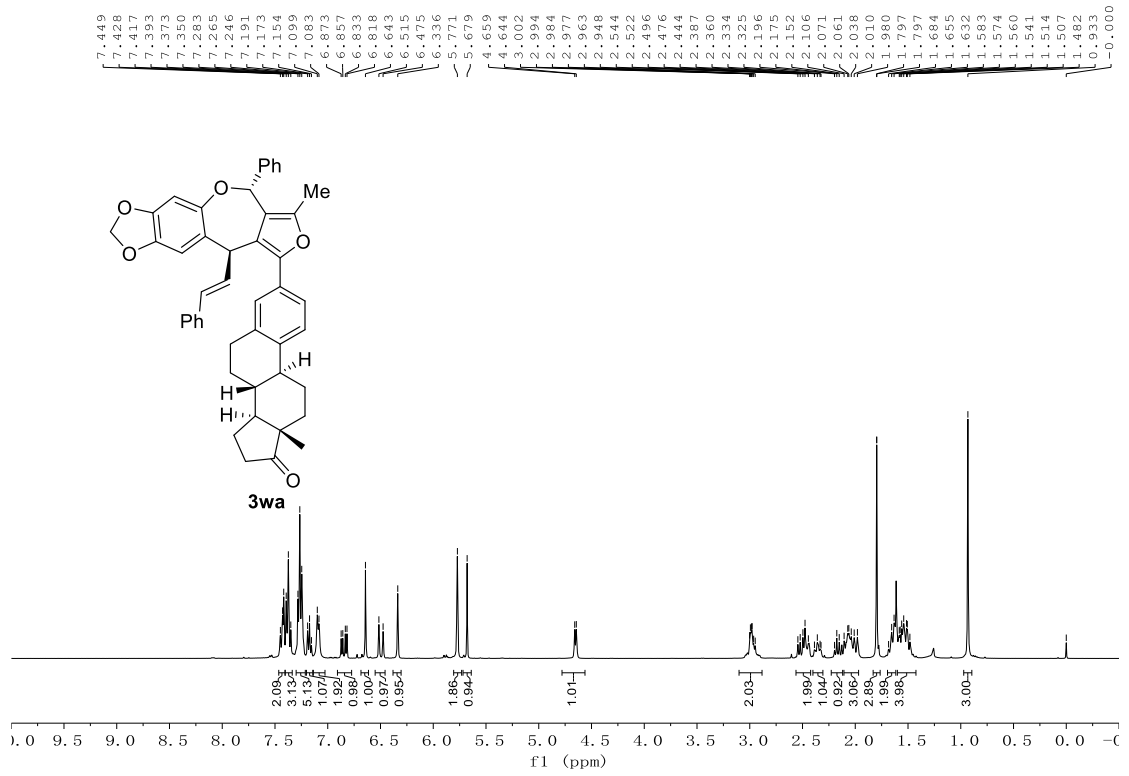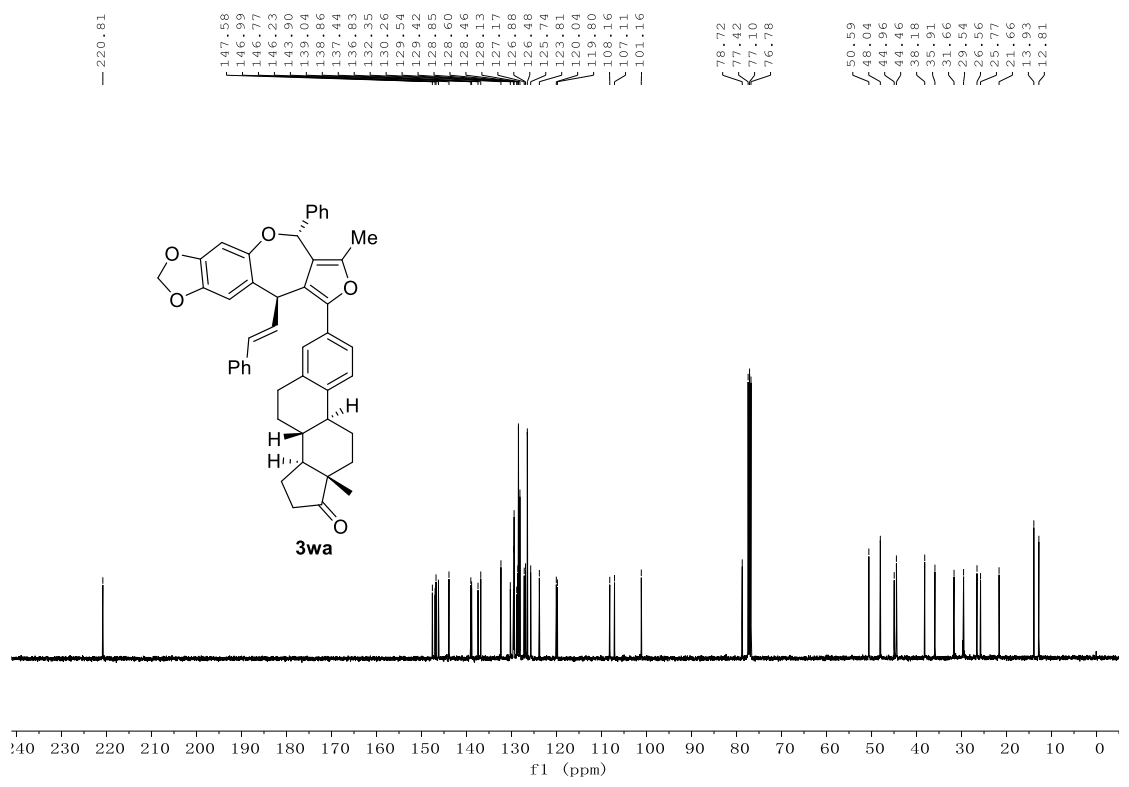



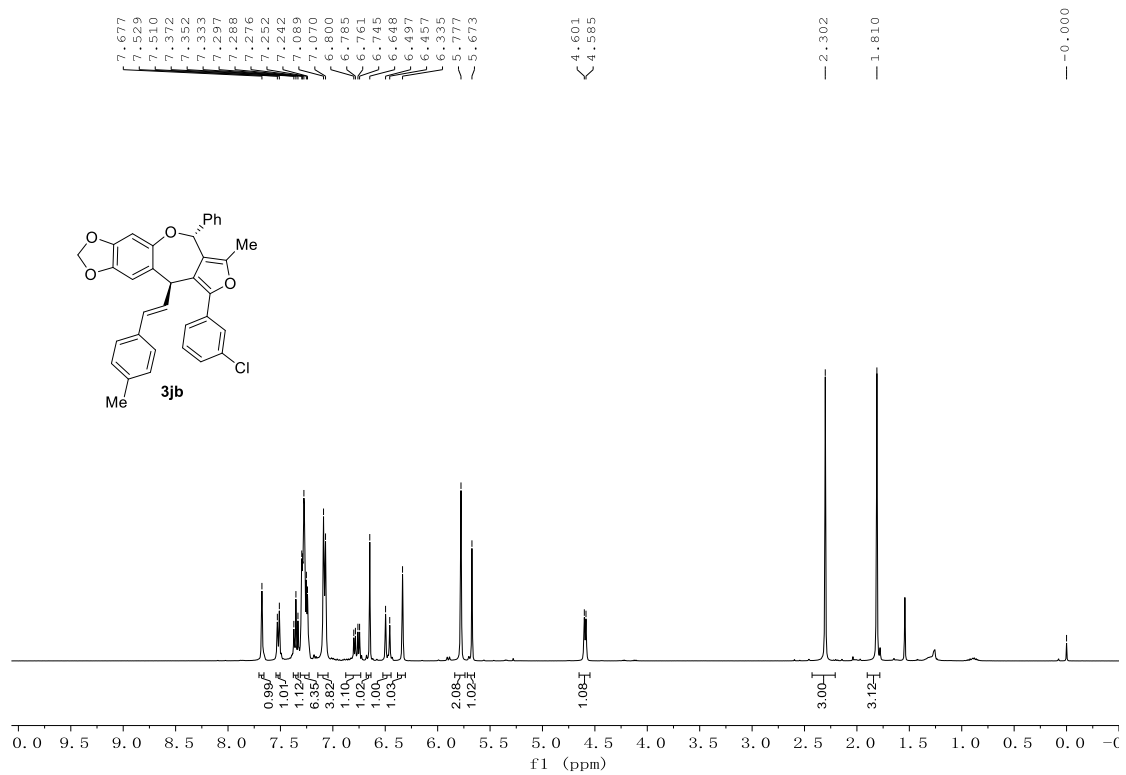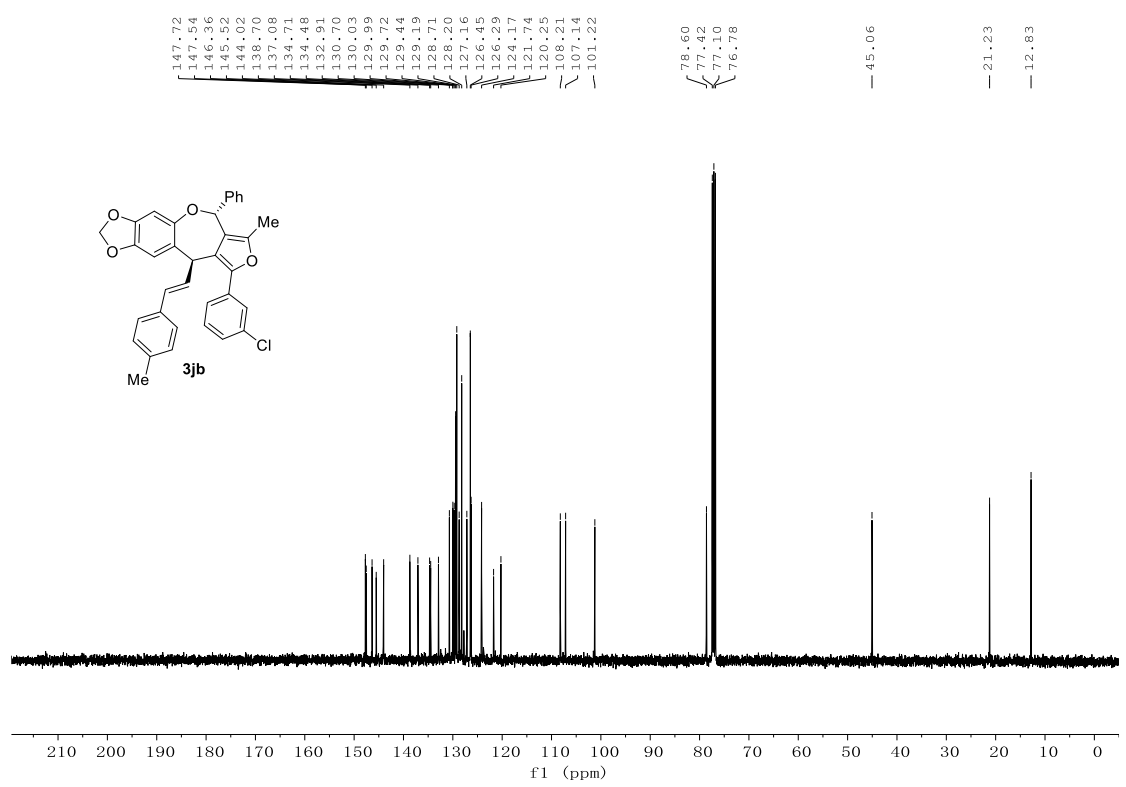

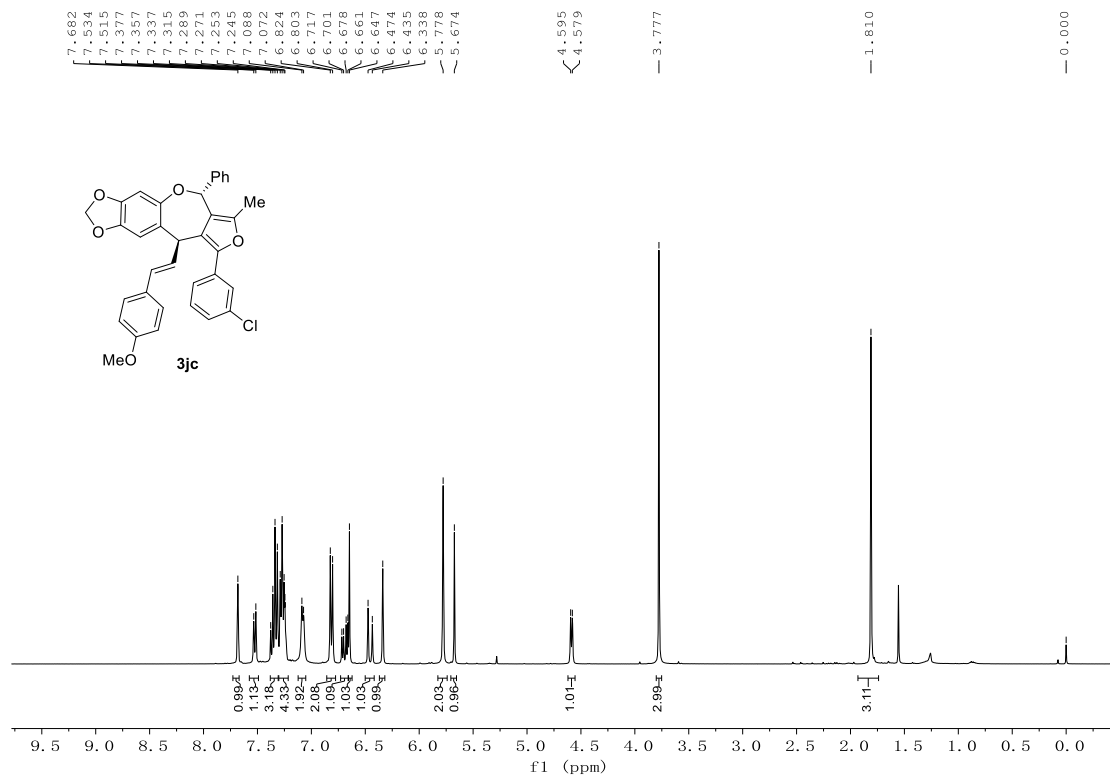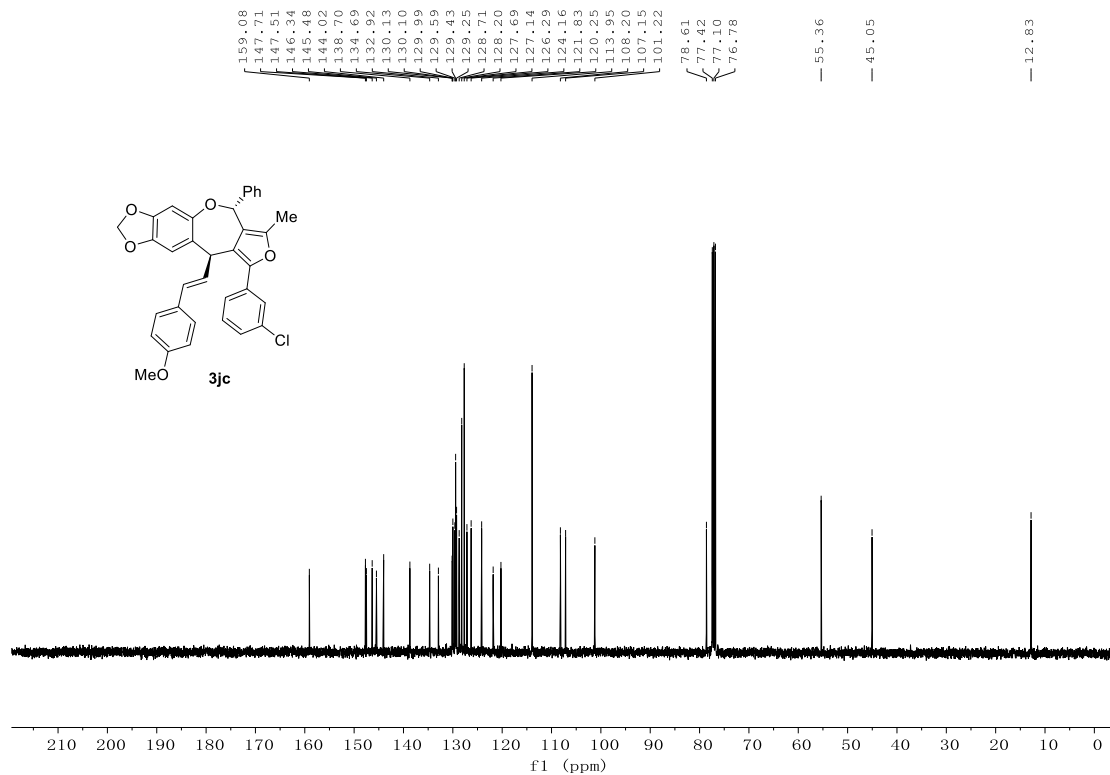



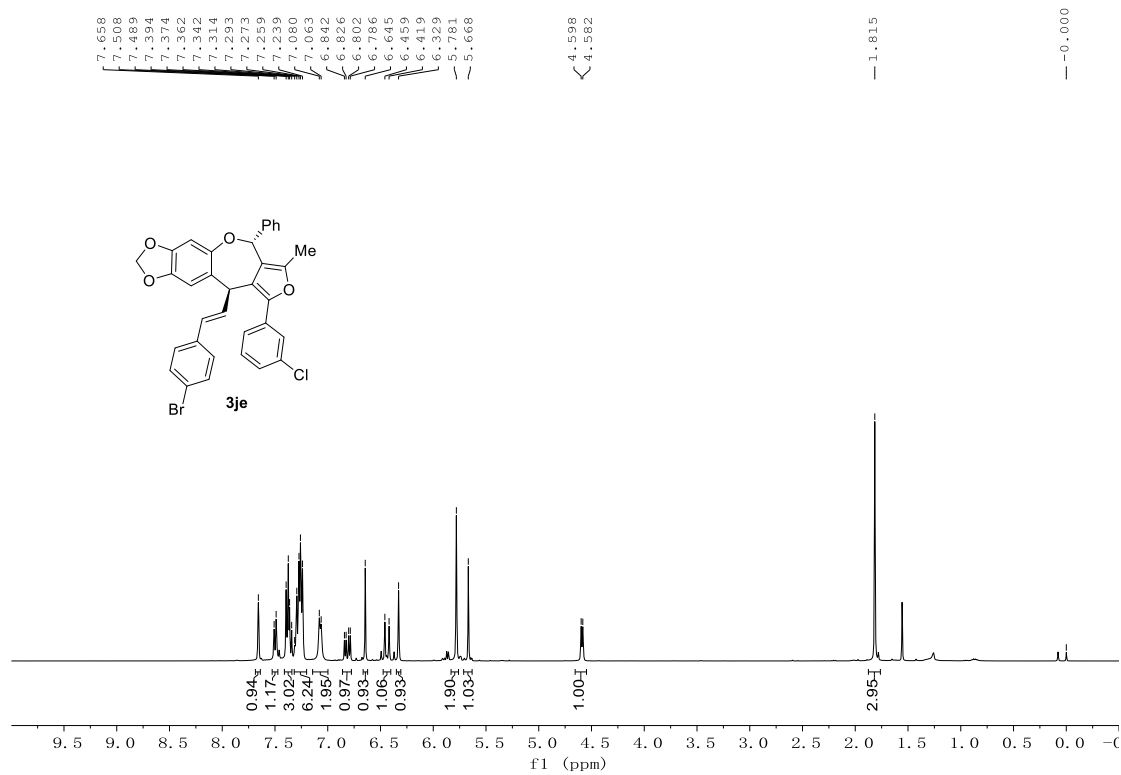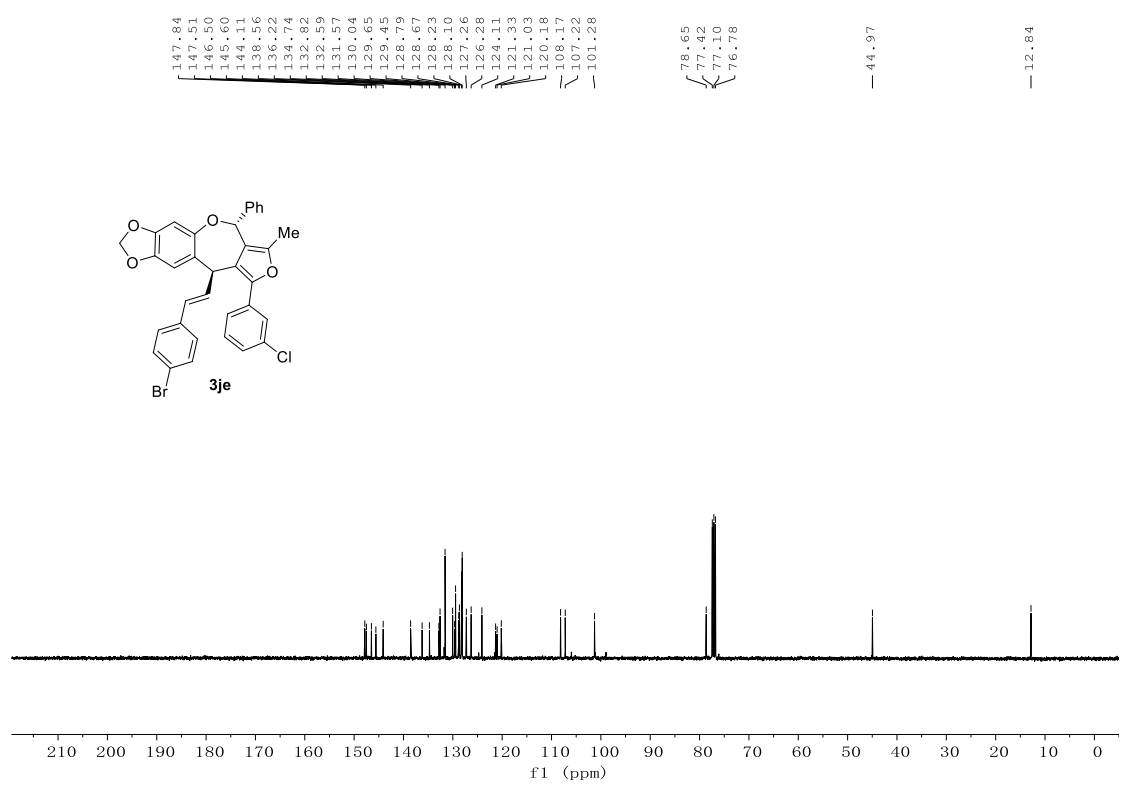

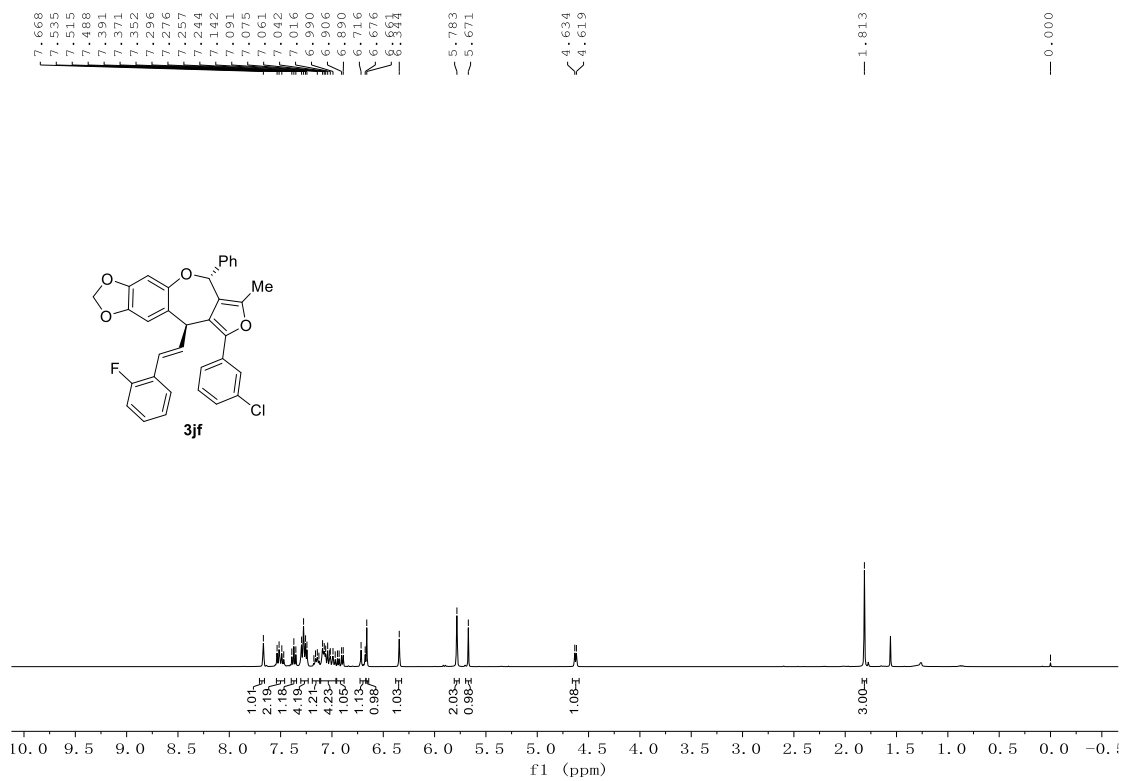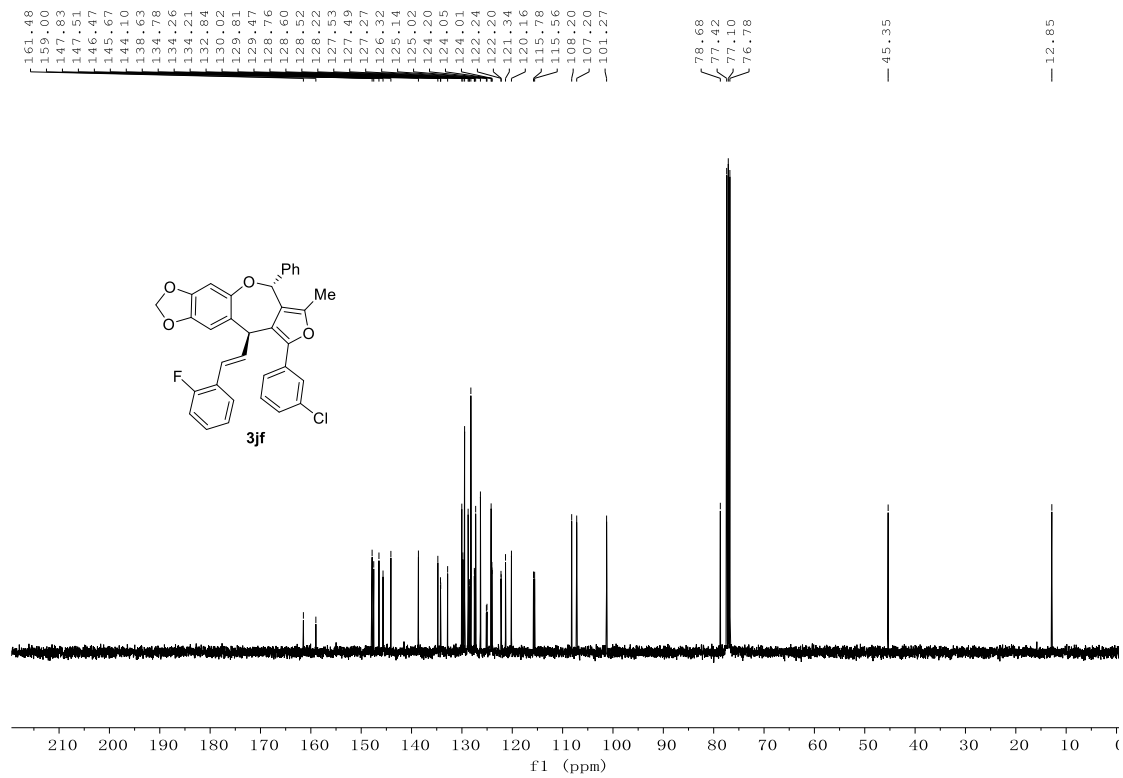

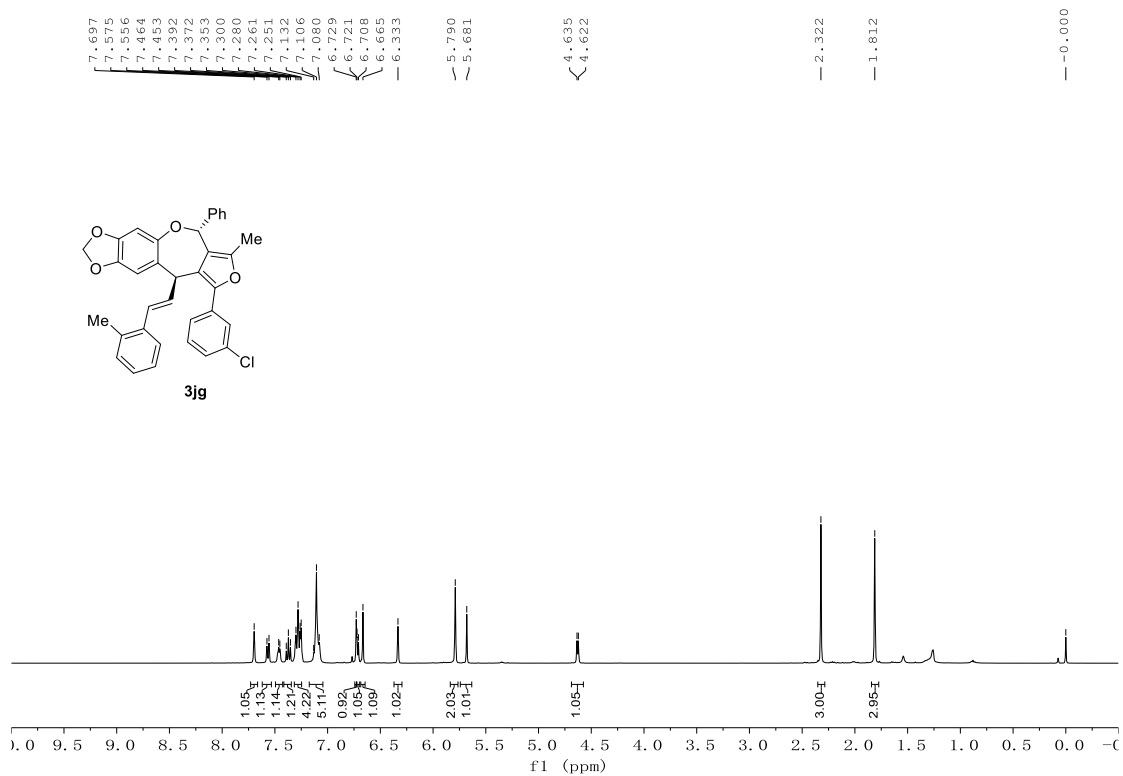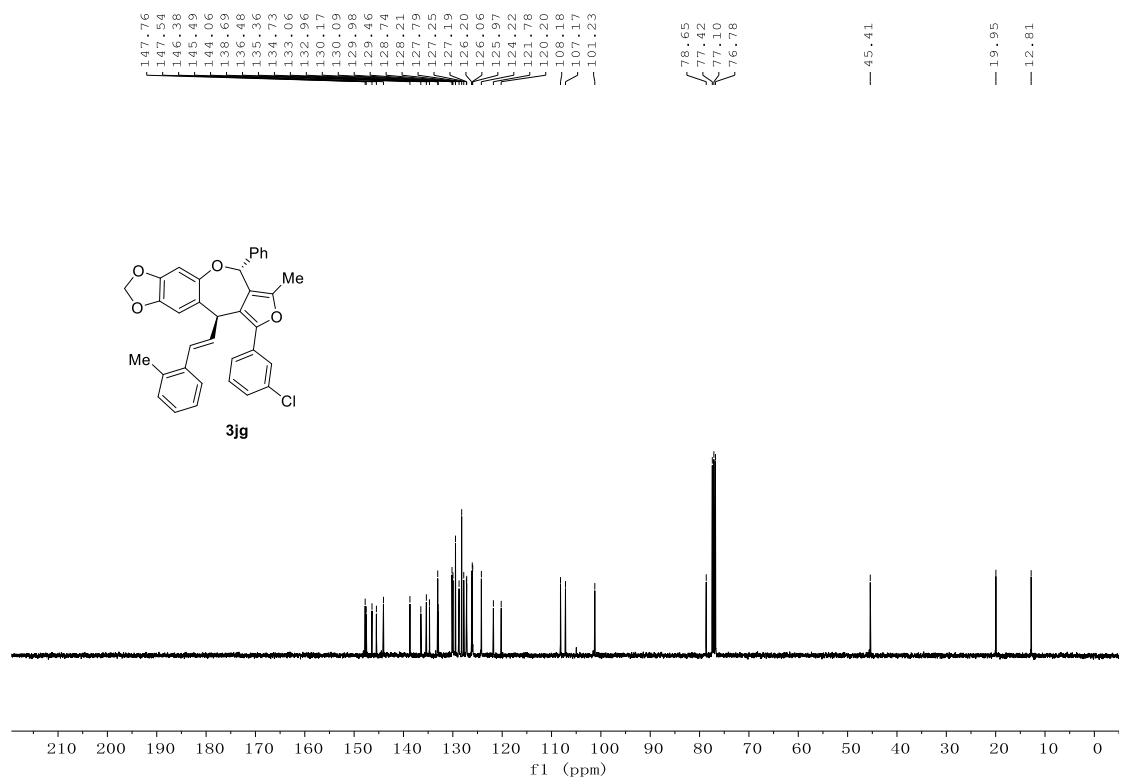

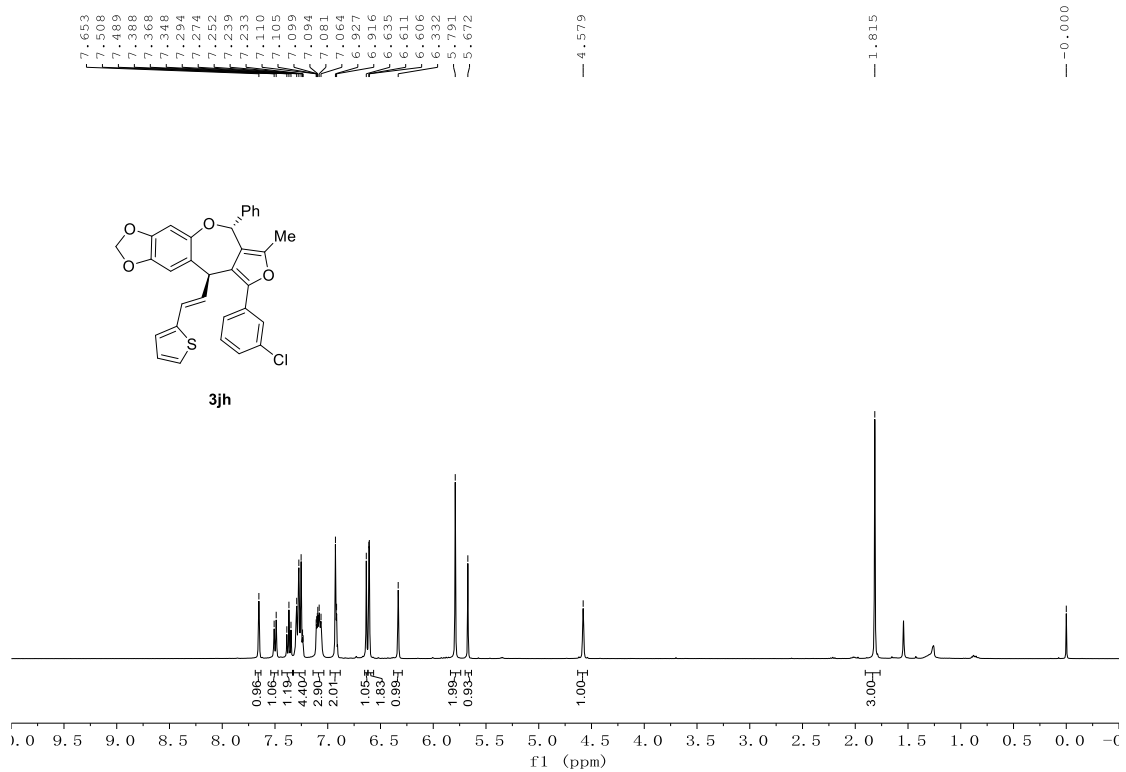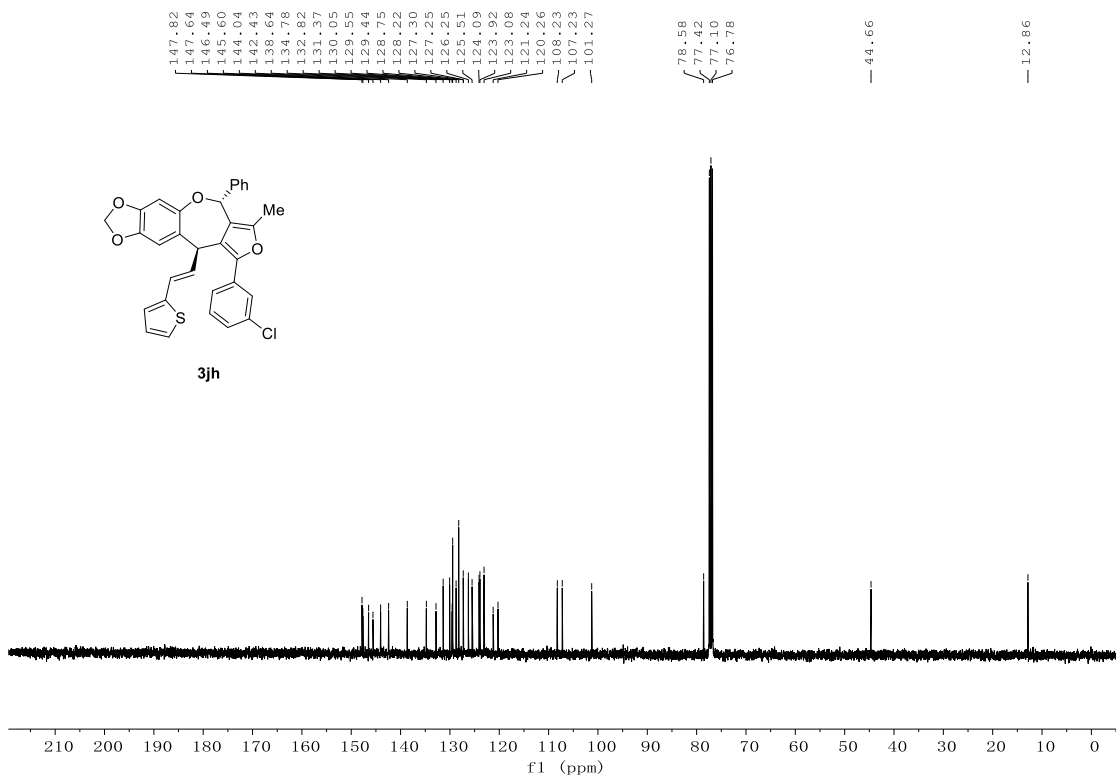

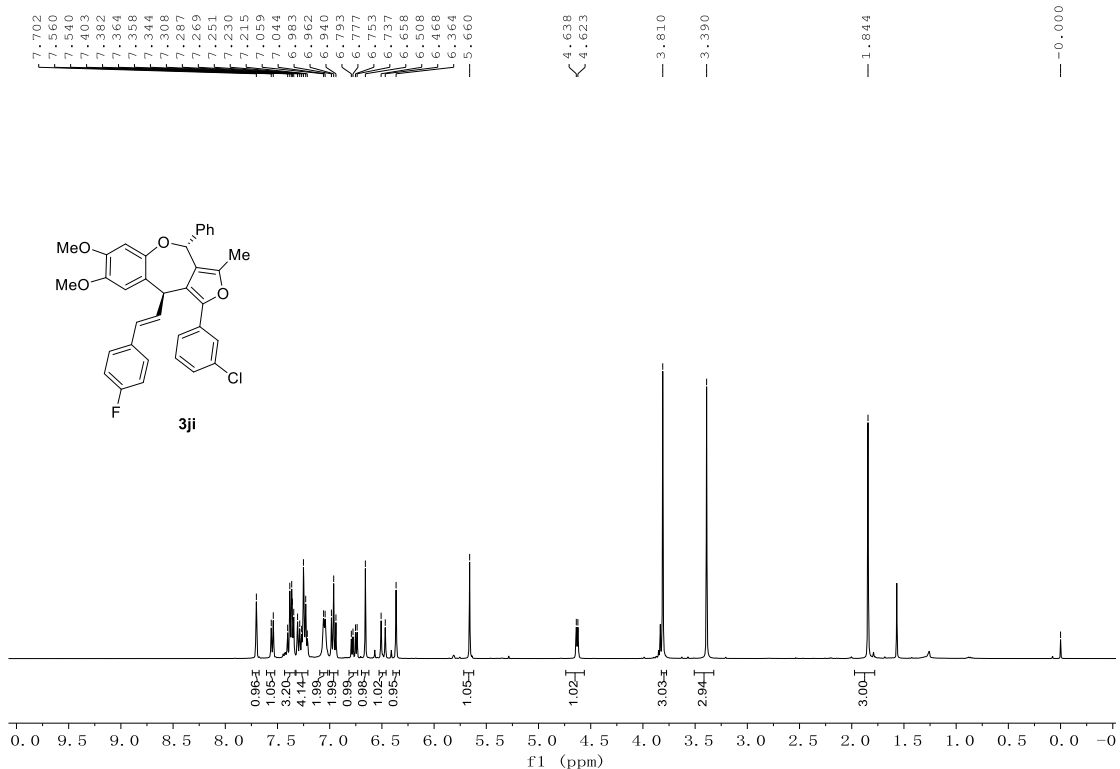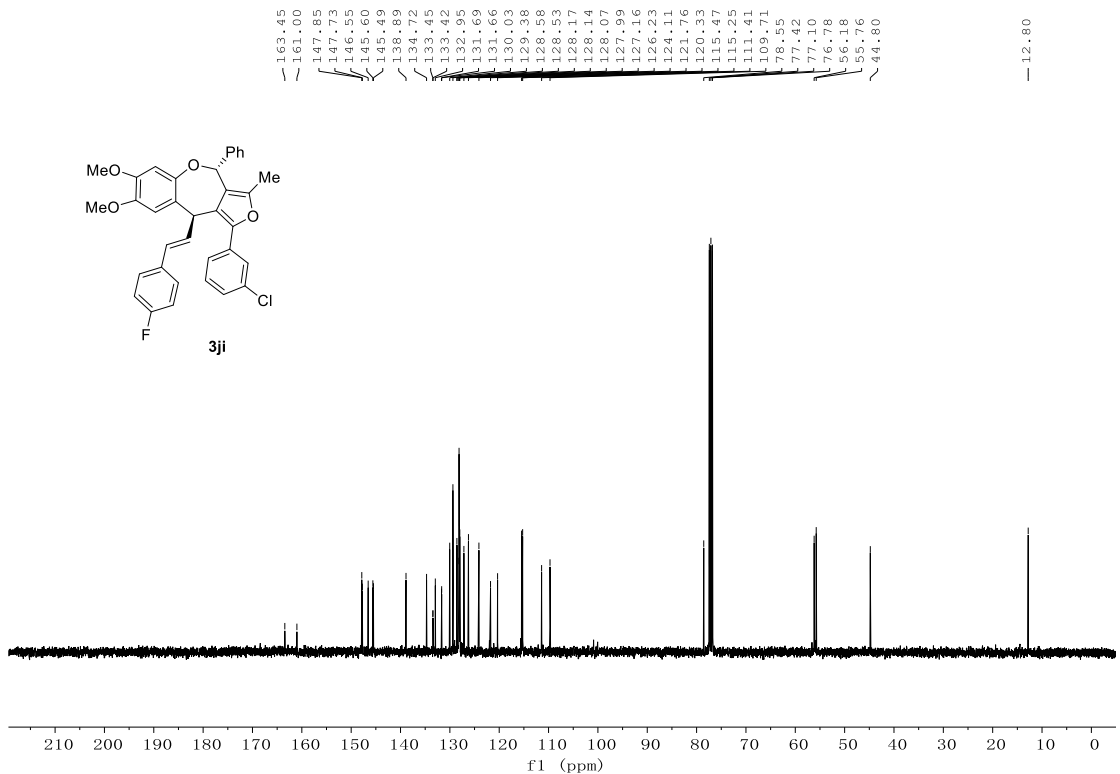



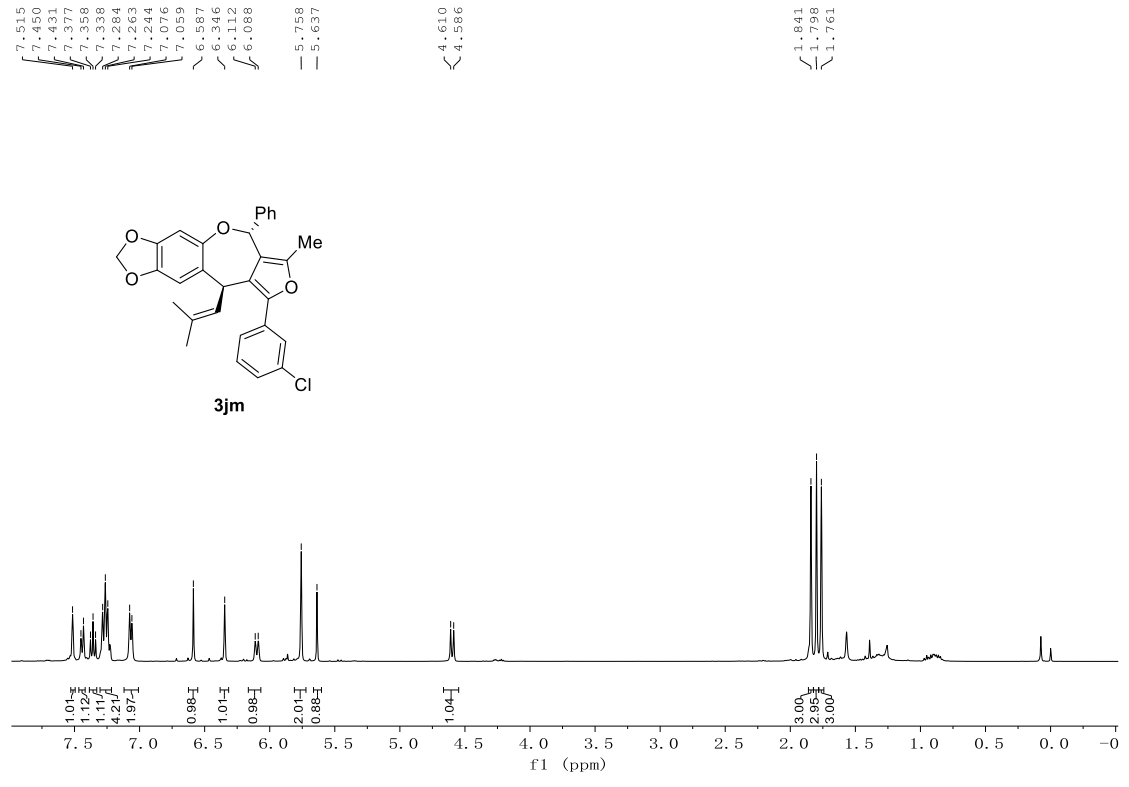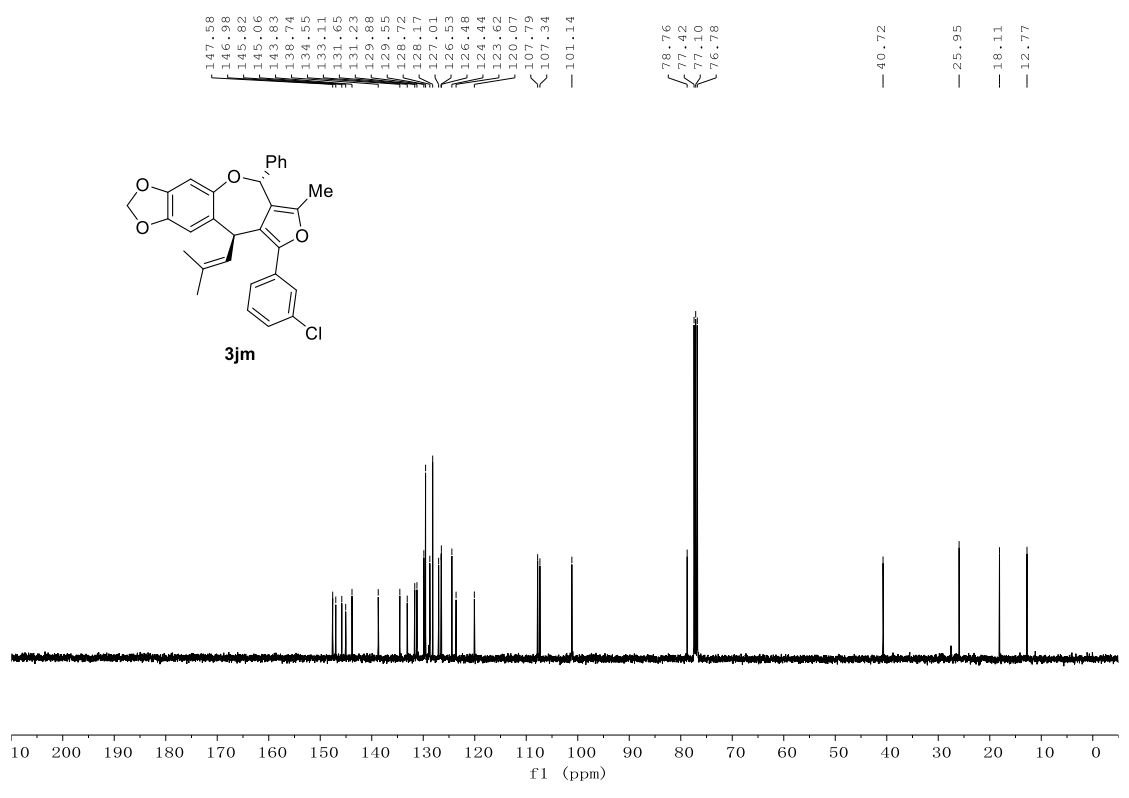

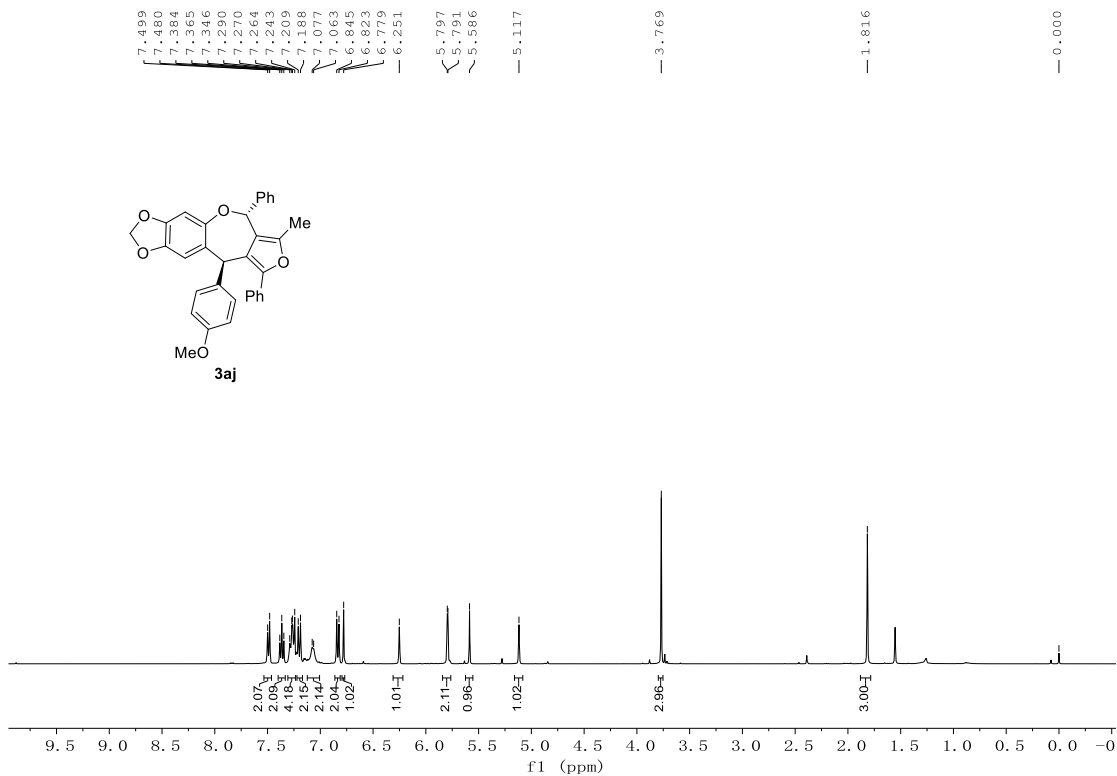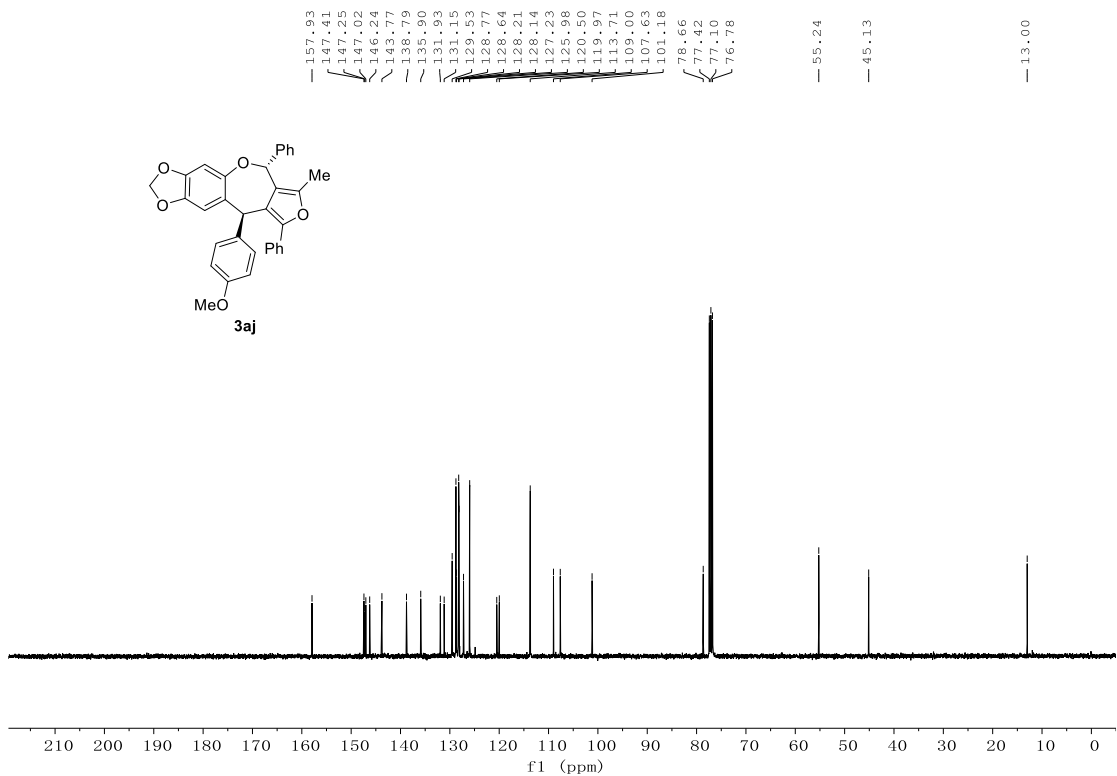

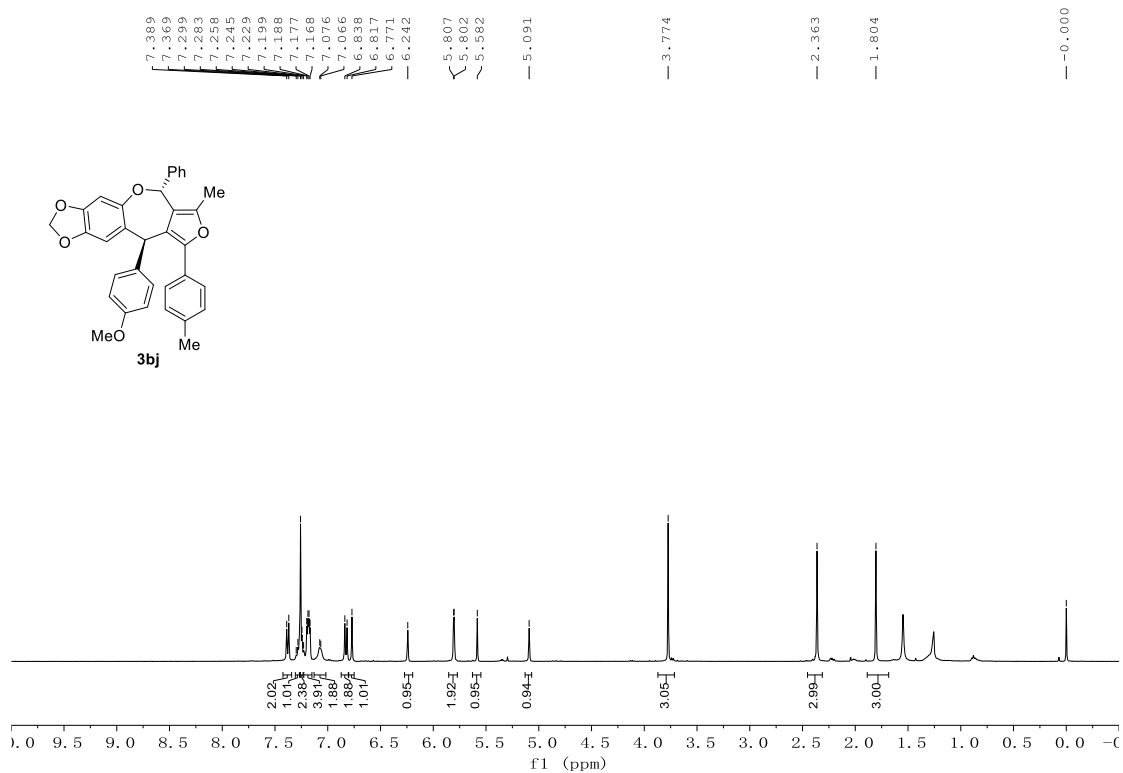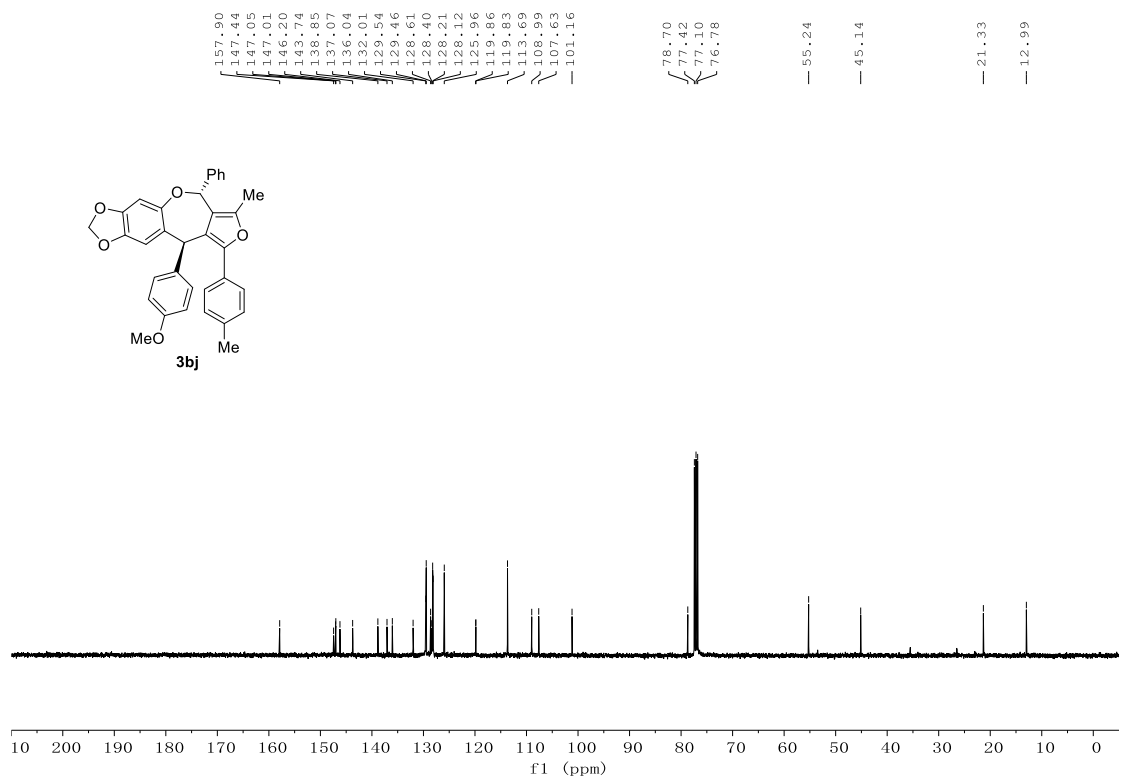

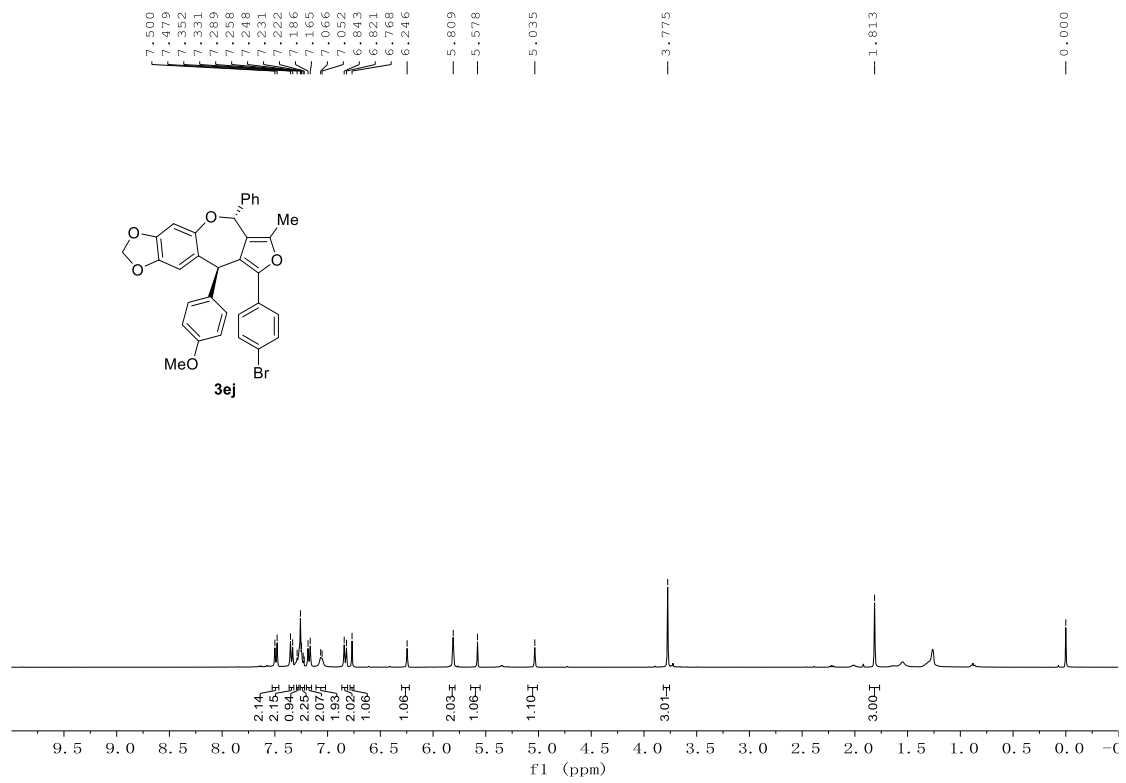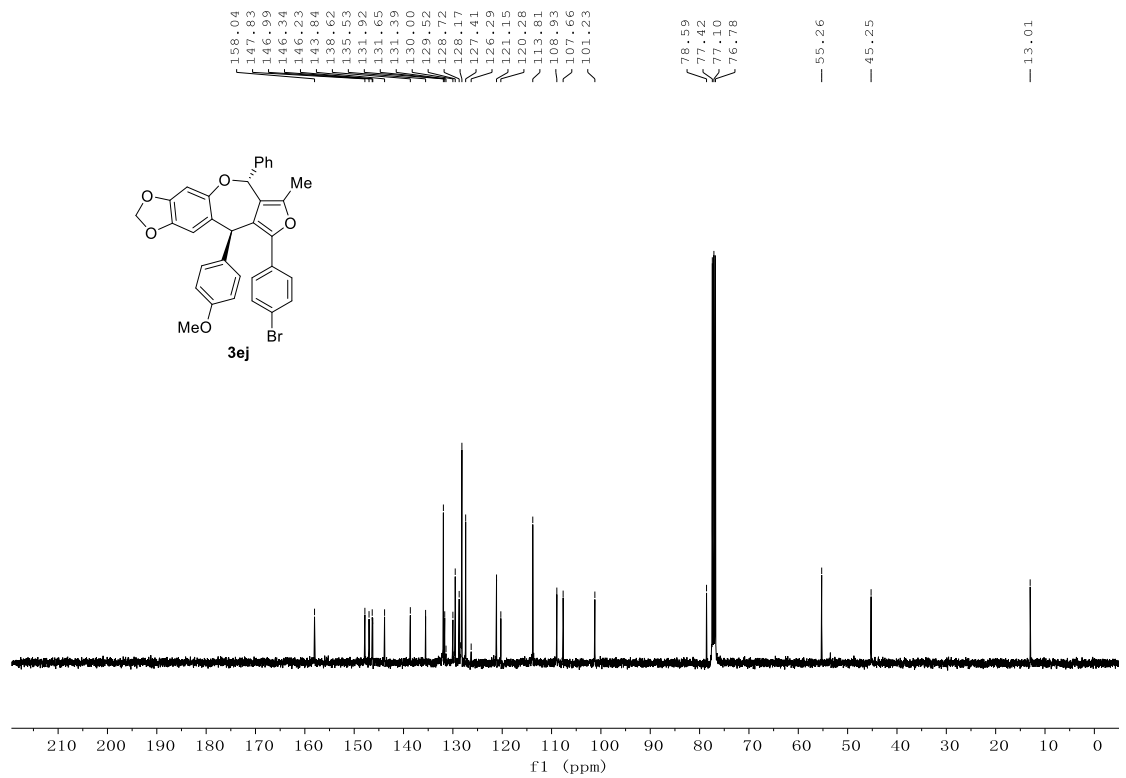

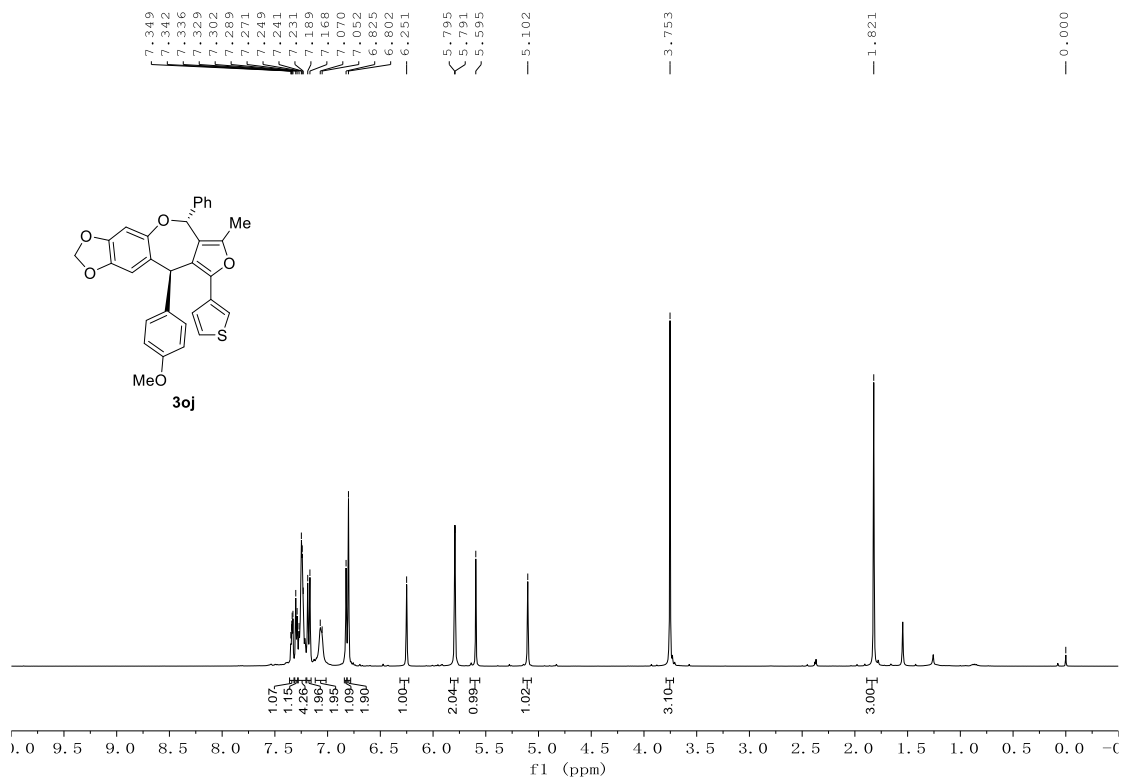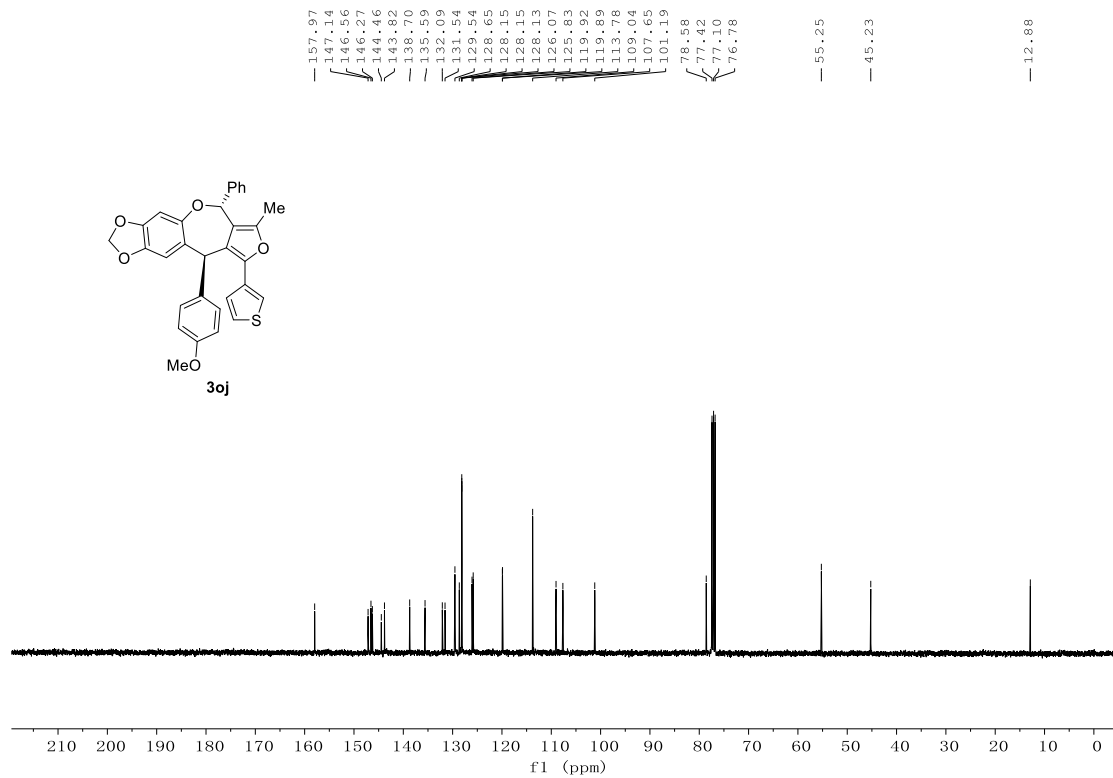

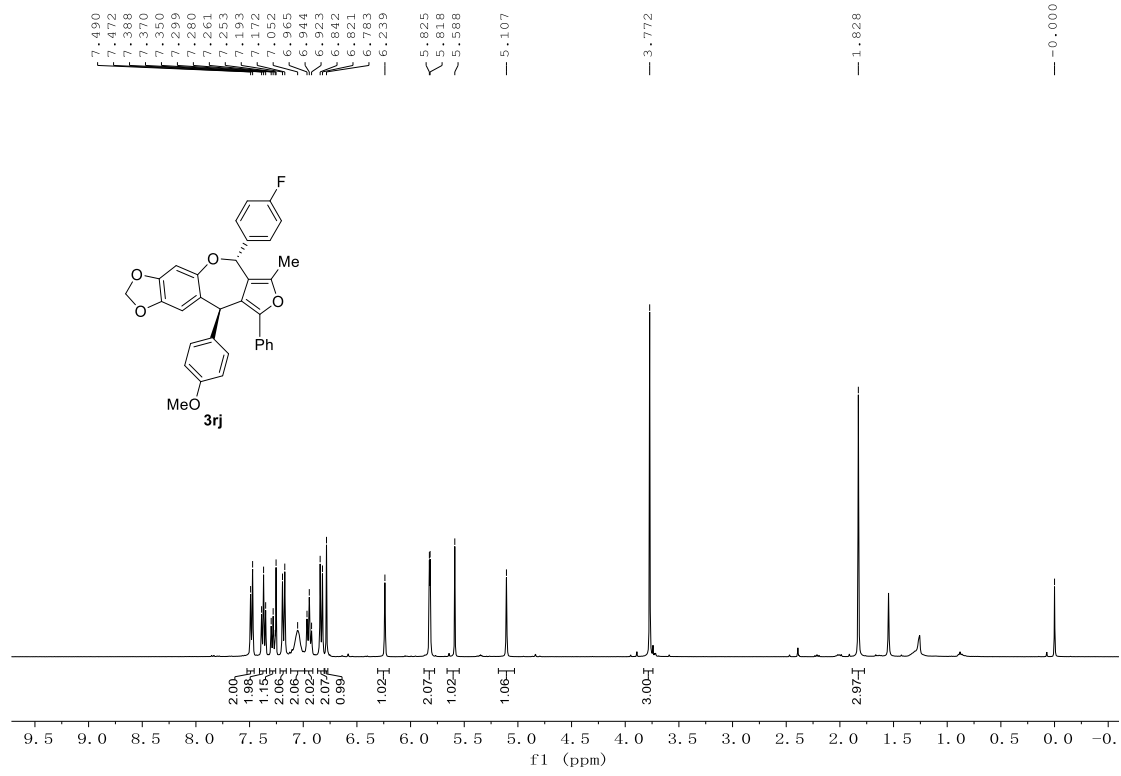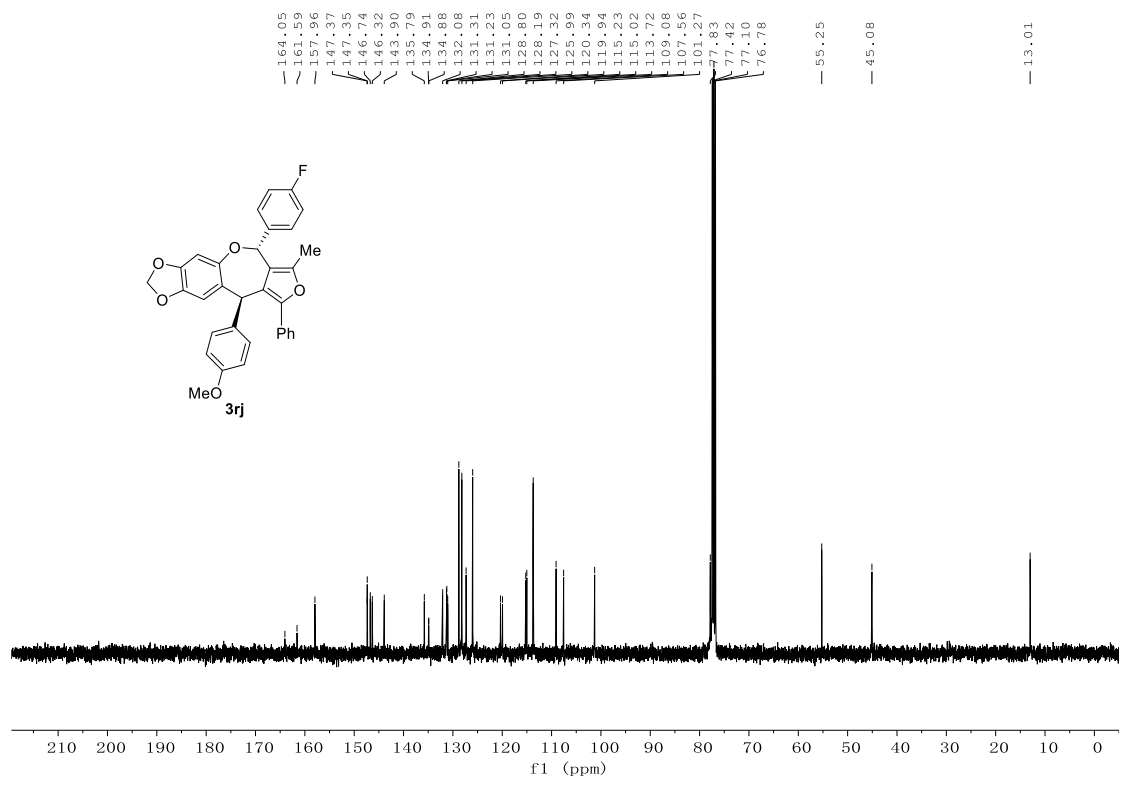

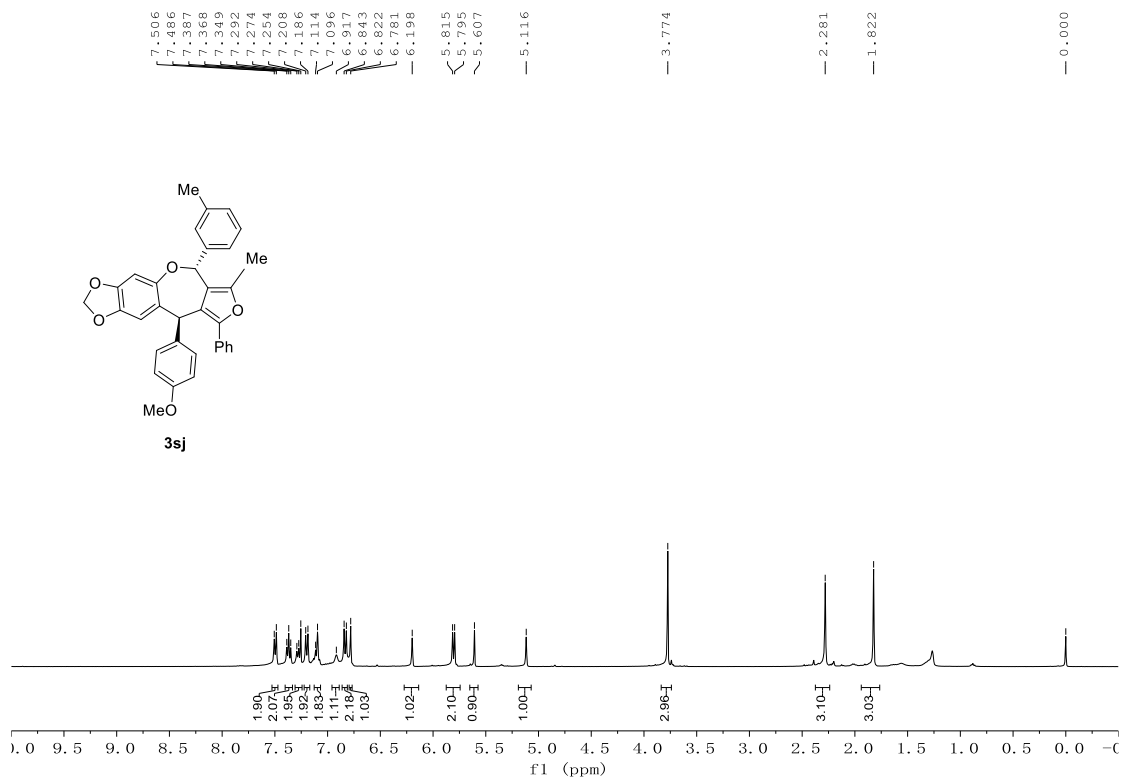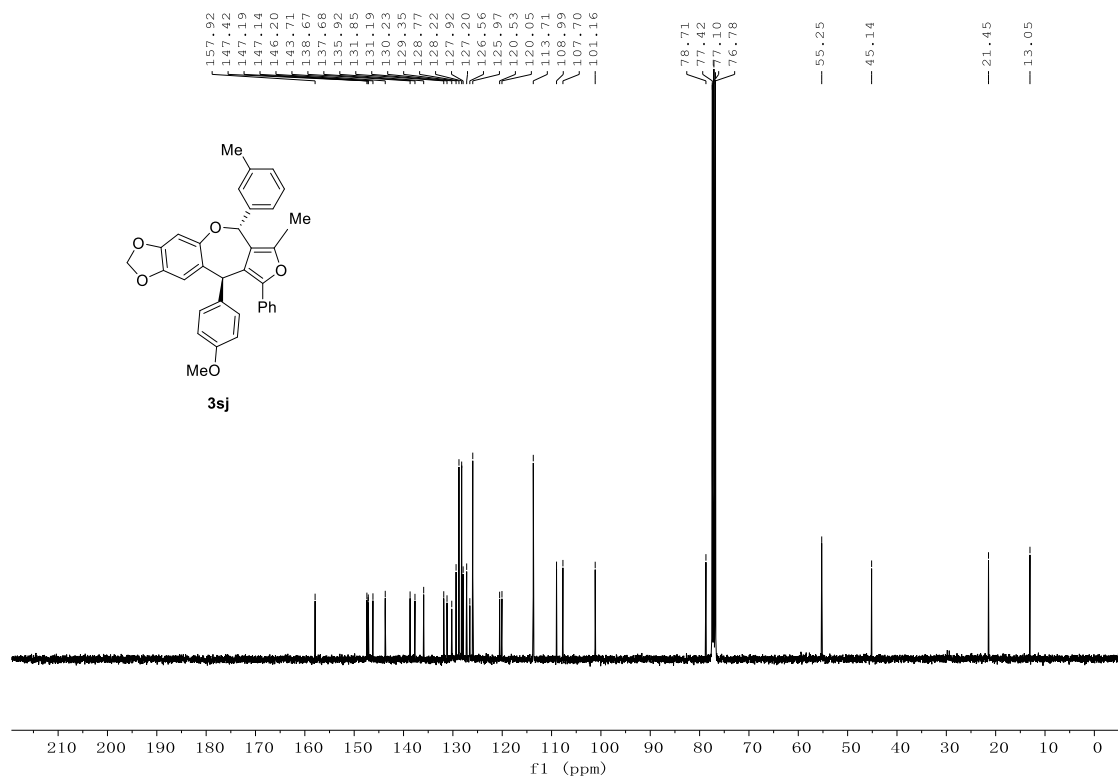

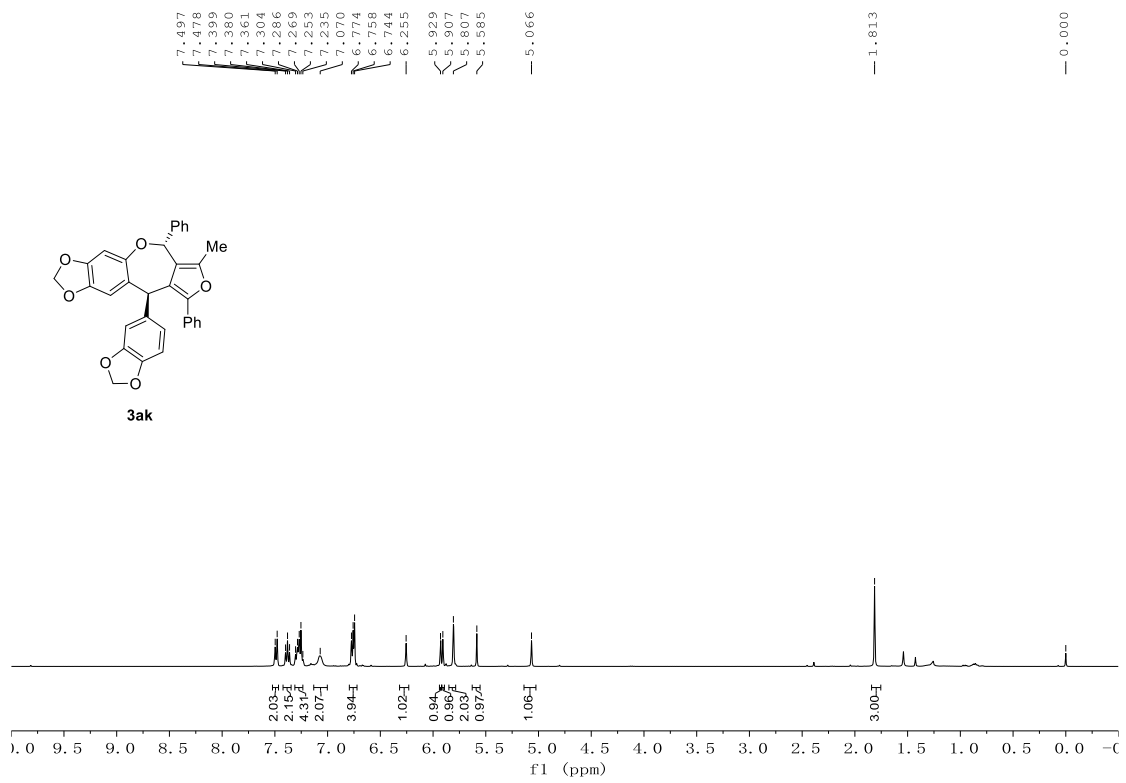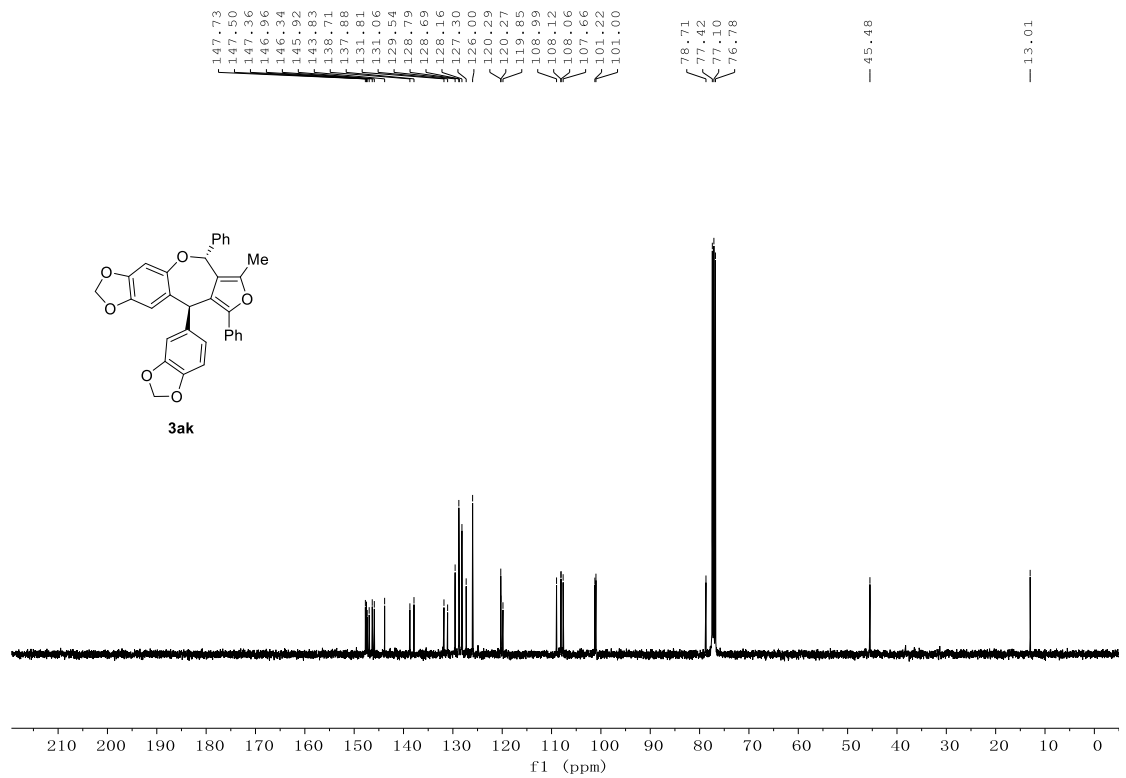



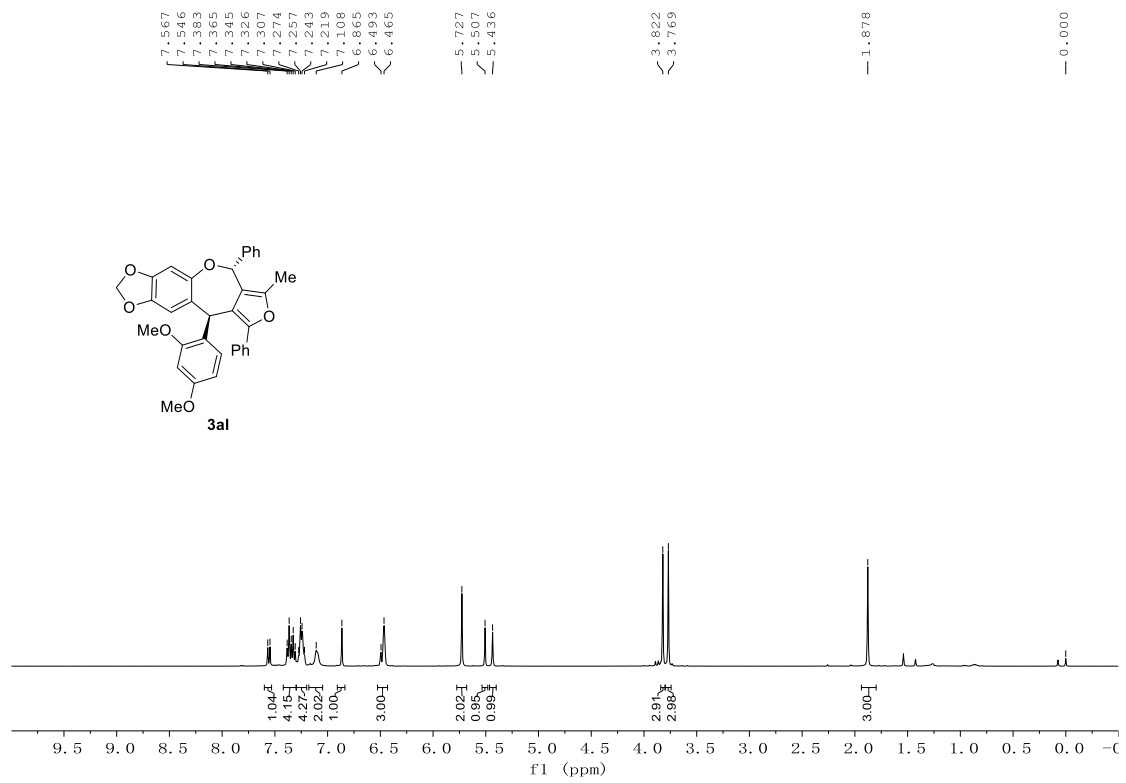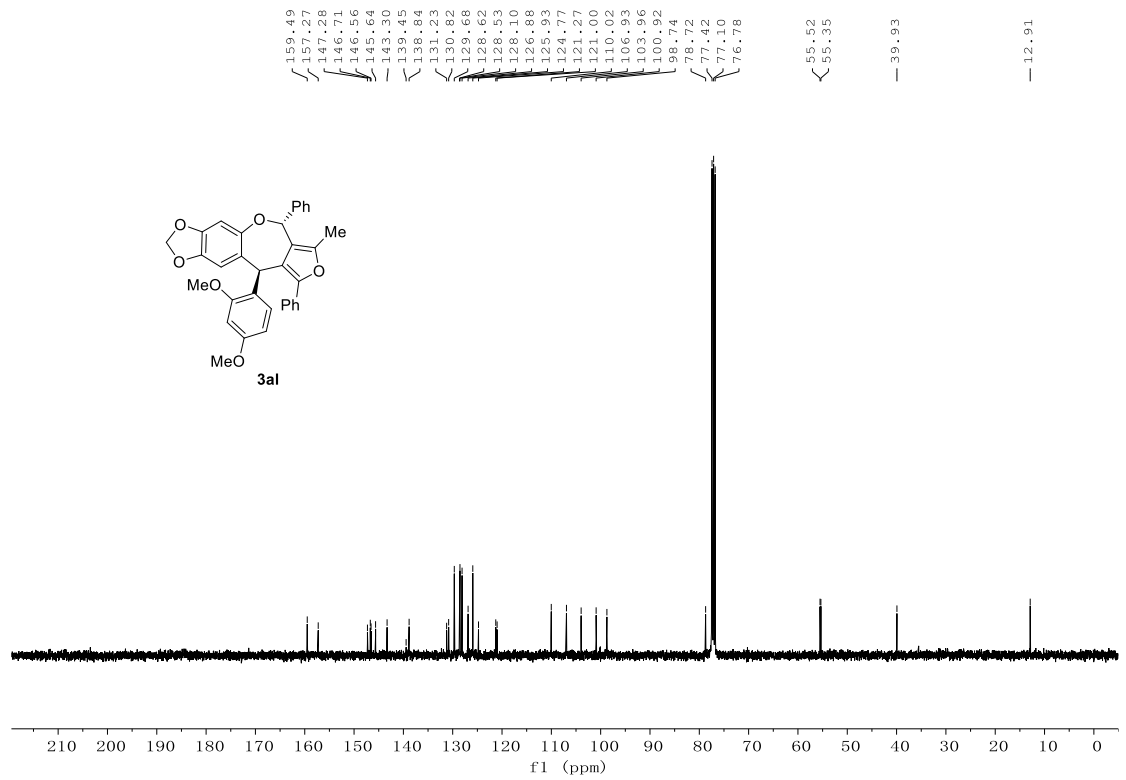

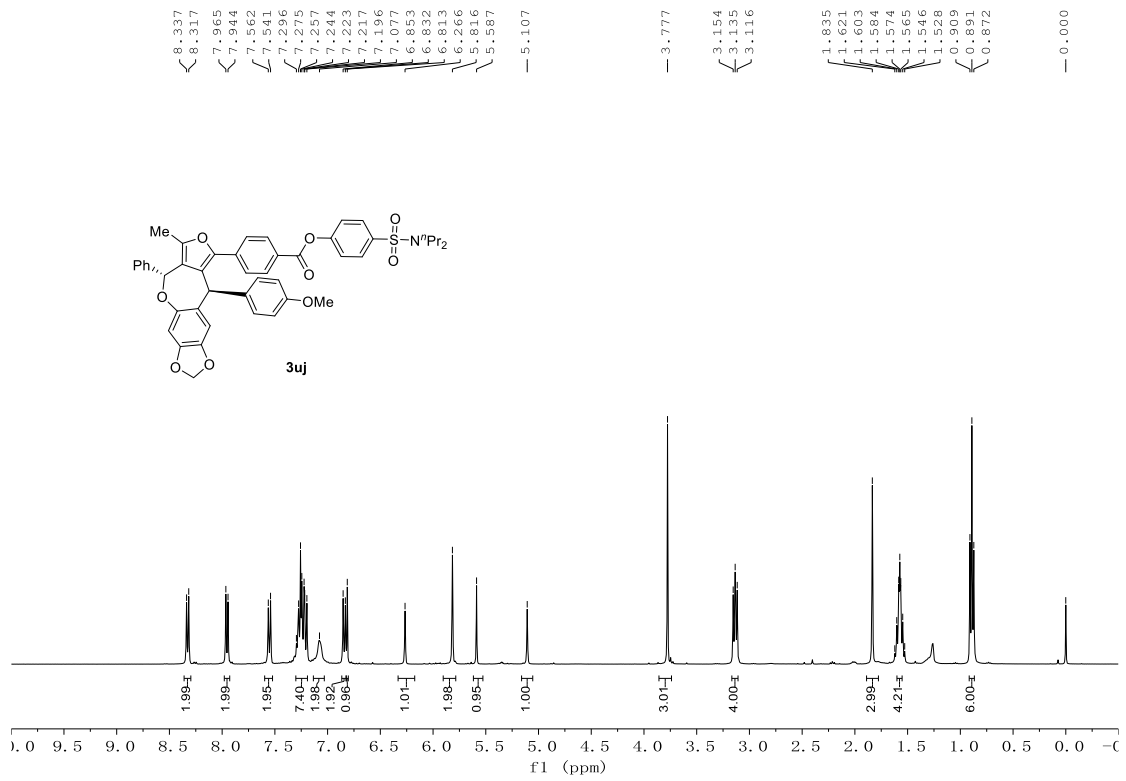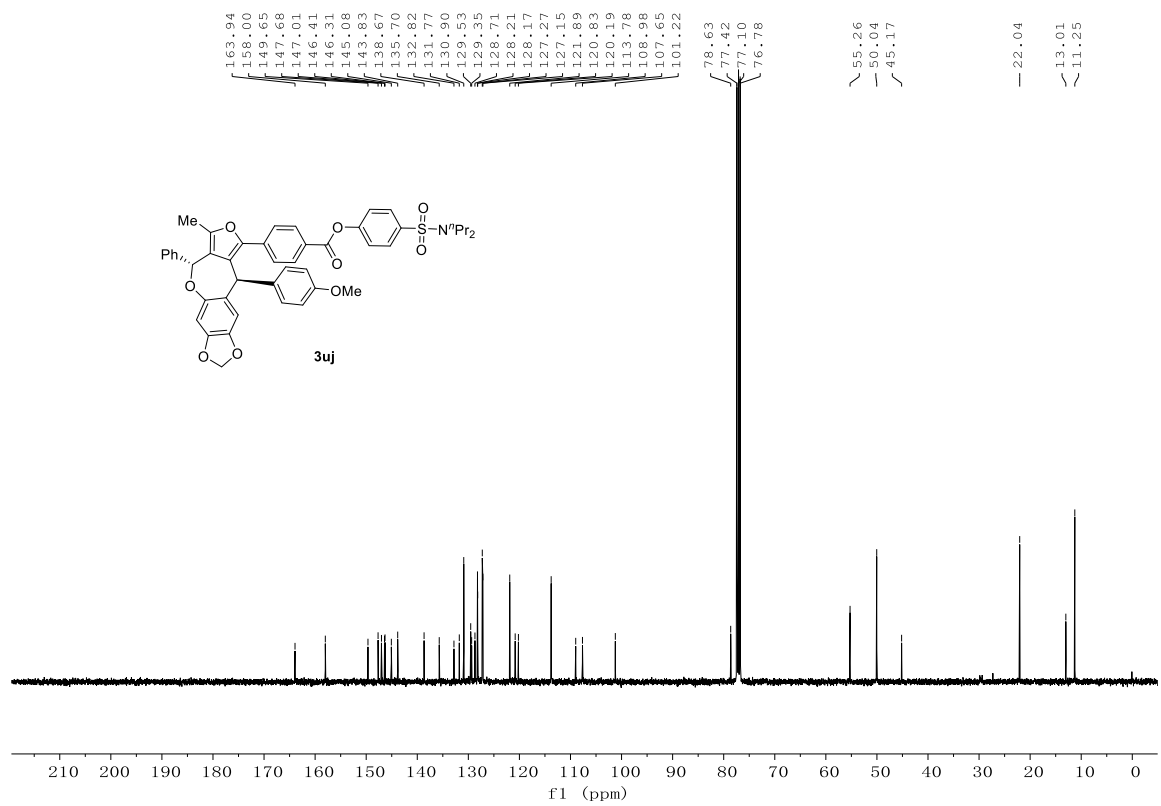

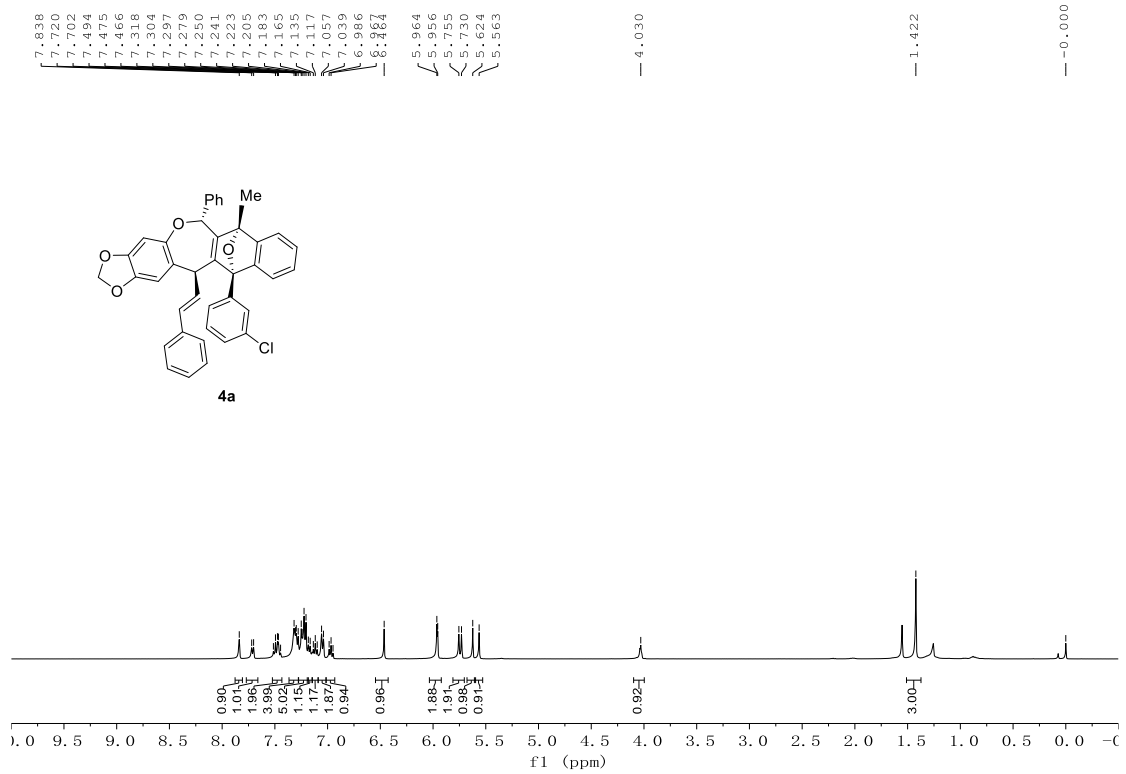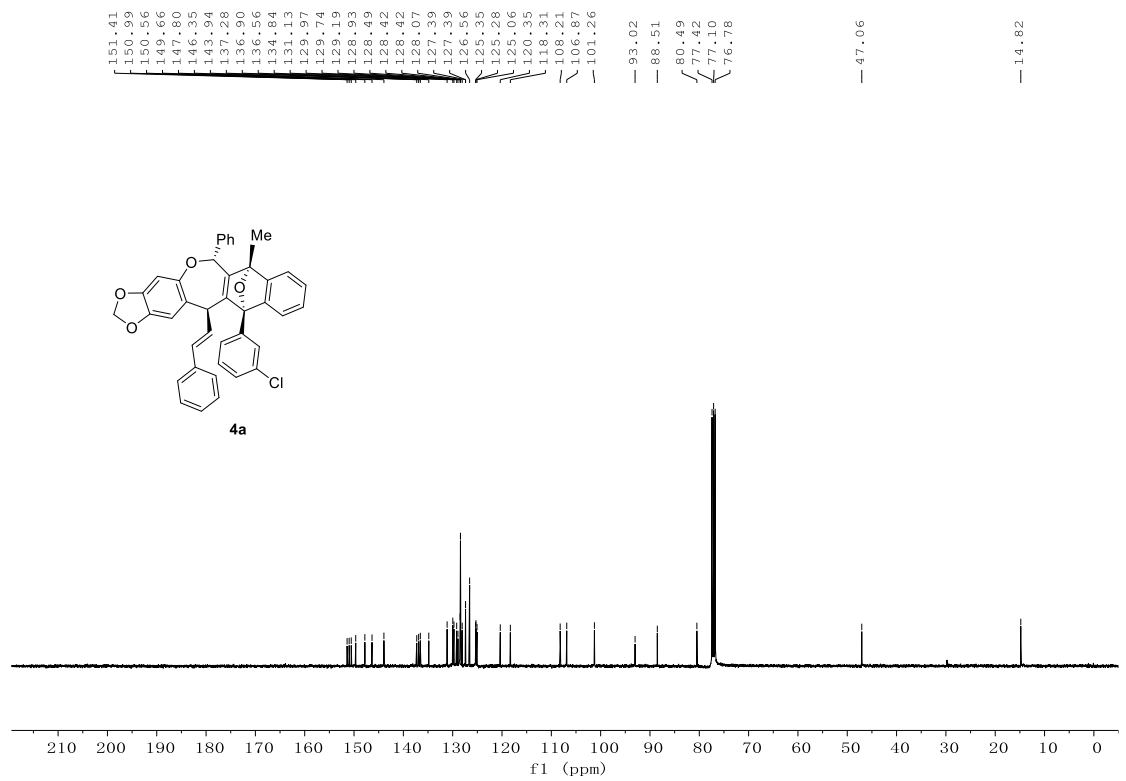

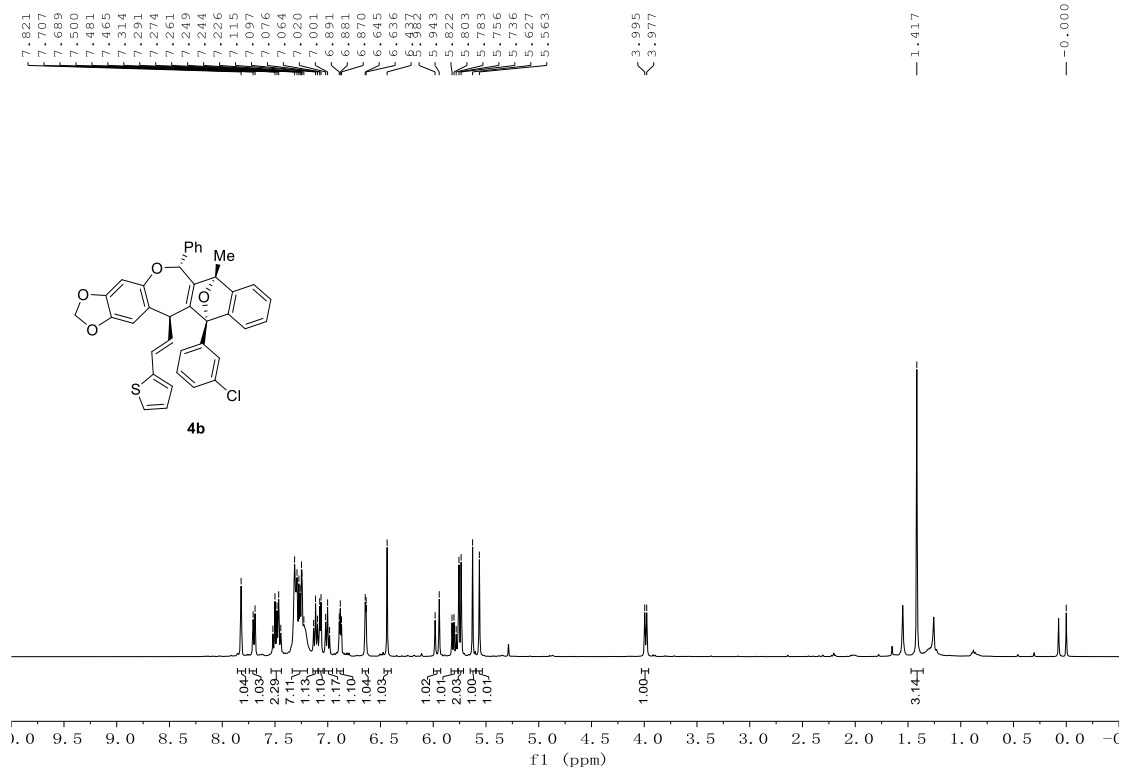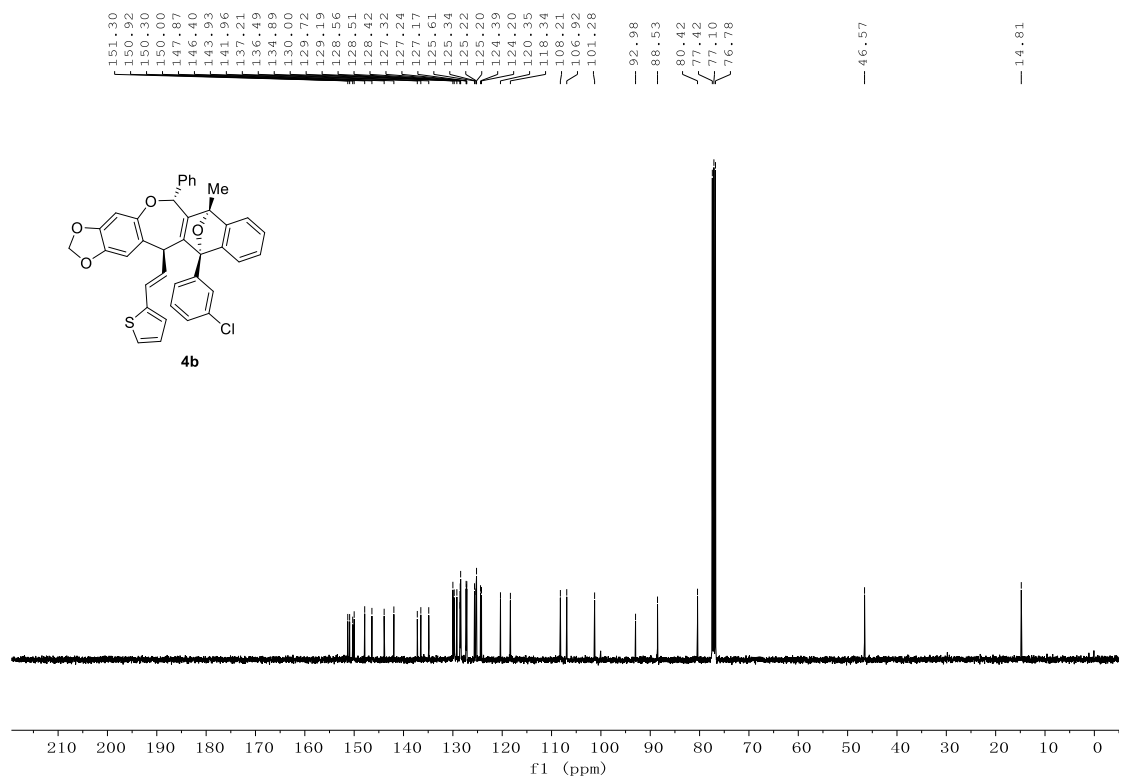

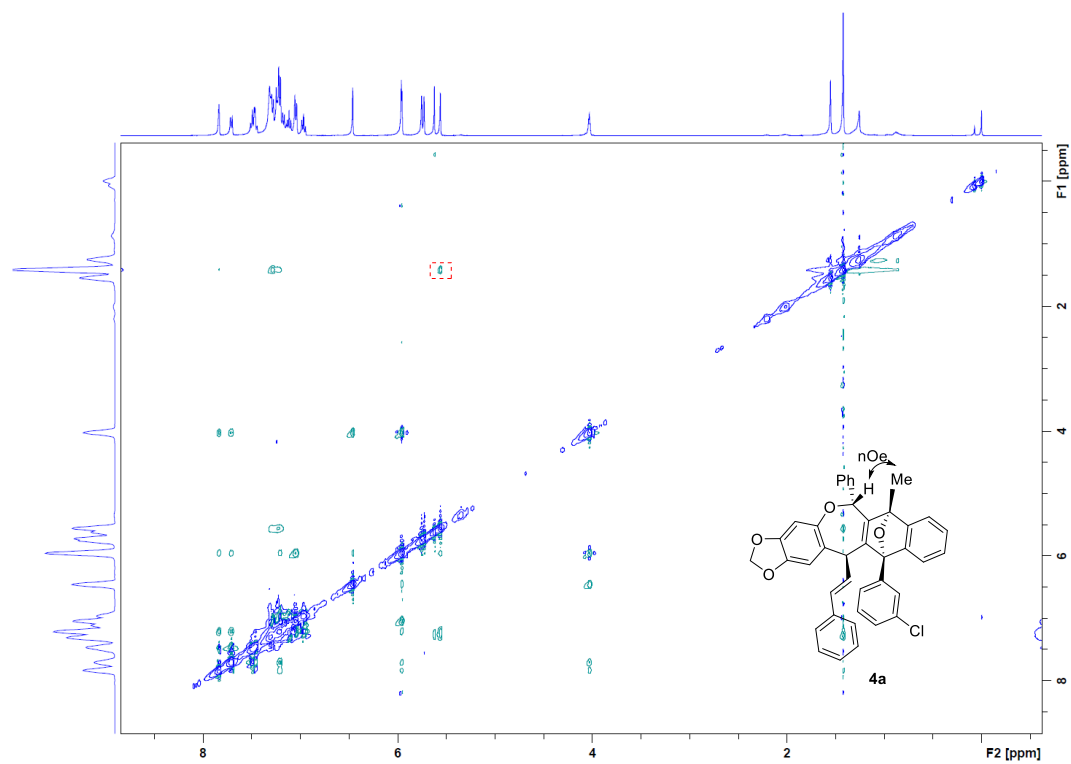

NOESY spectrum of **4a** in CDCl<sub>3</sub>

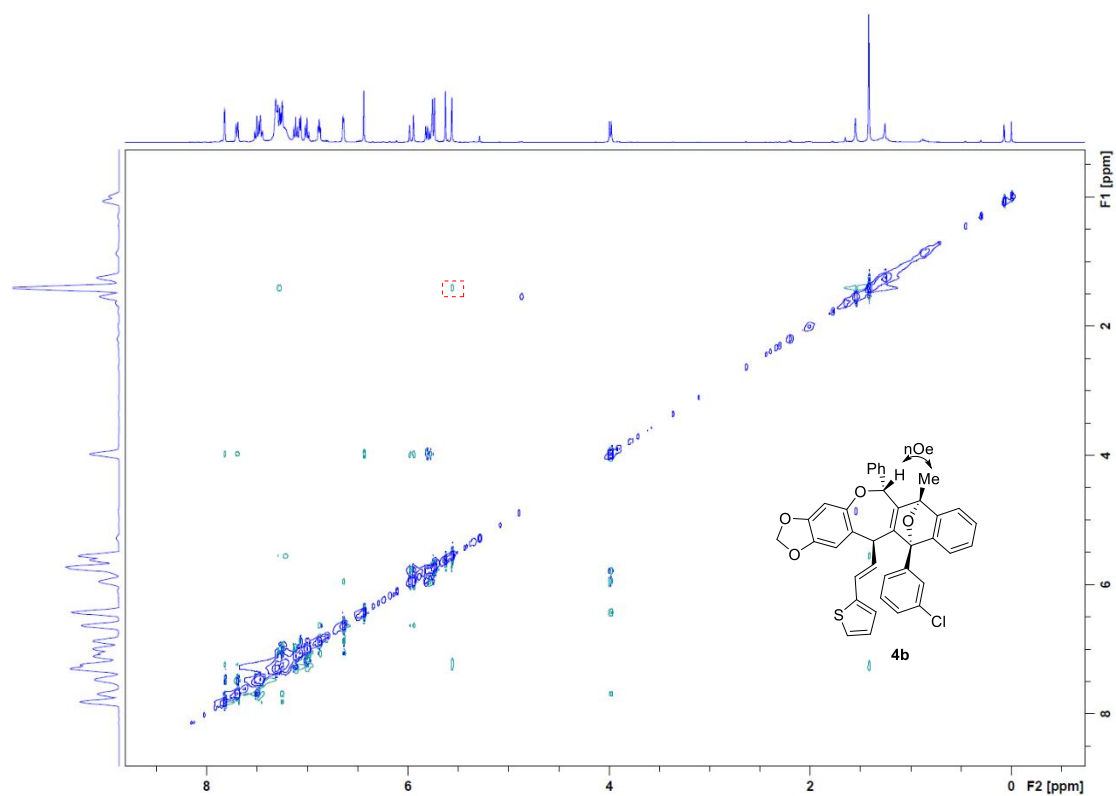

NOESY spectrum of **4b** in CDCl<sub>3</sub>

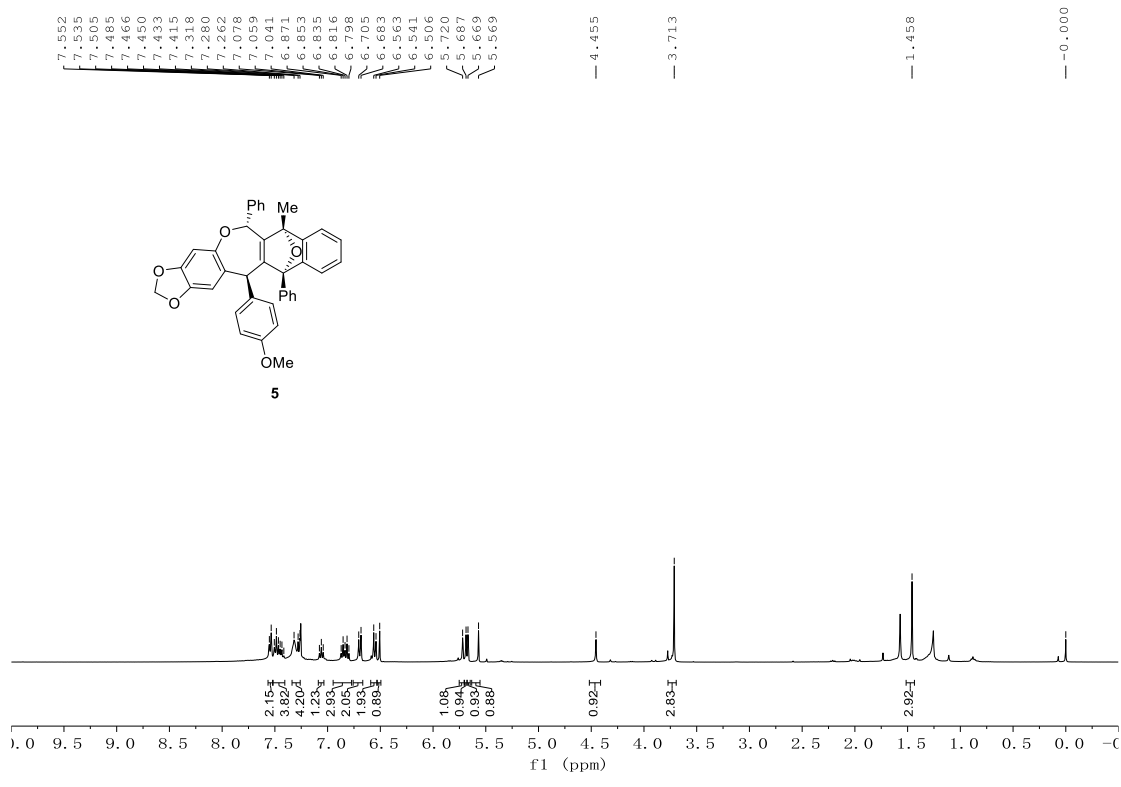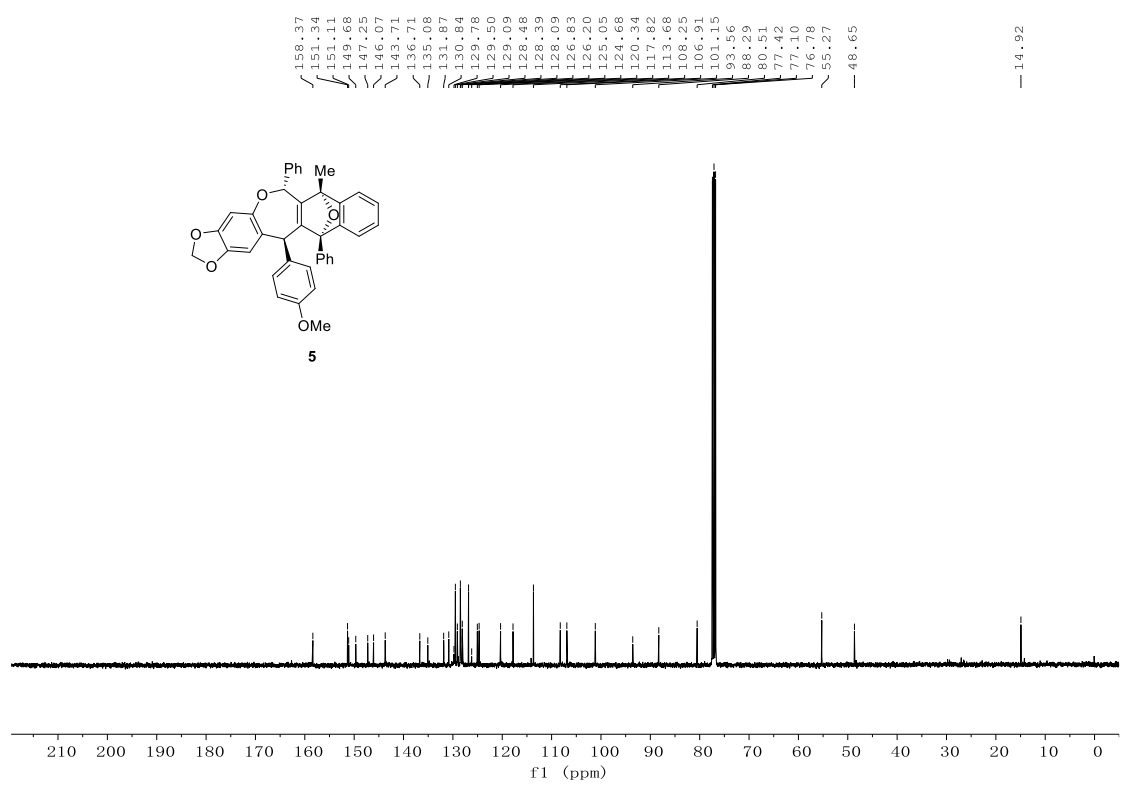

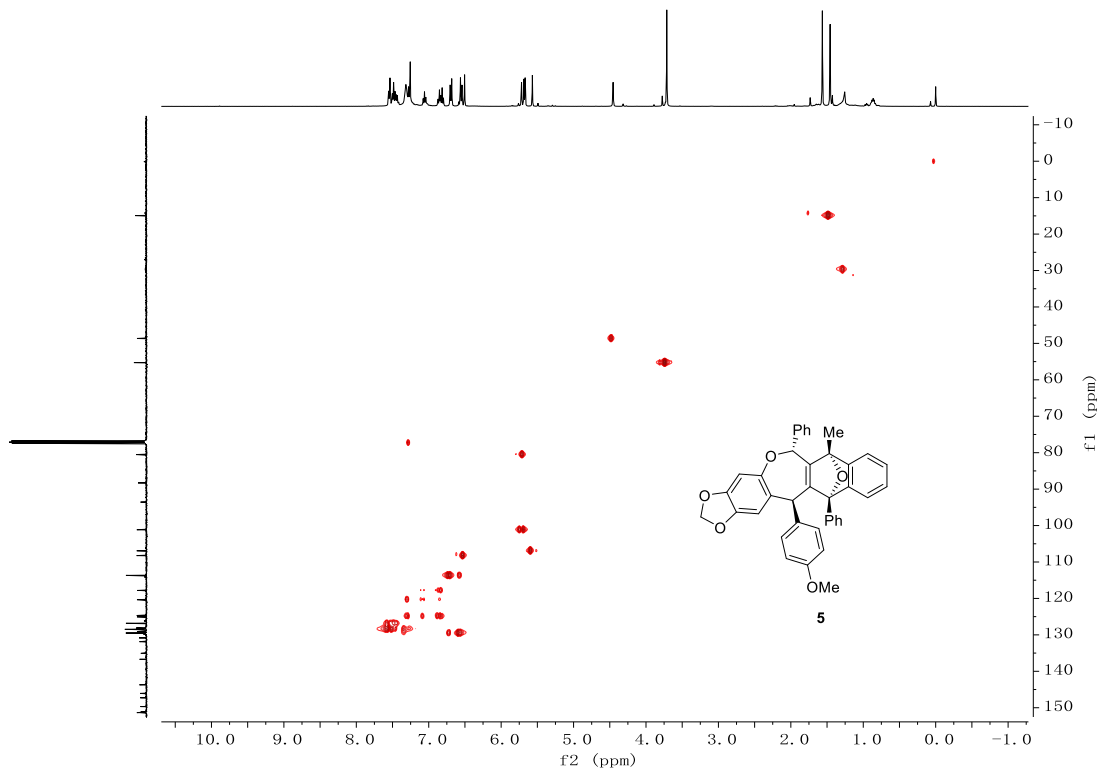

HSQC spectrum of **5** in CDCl<sub>3</sub>

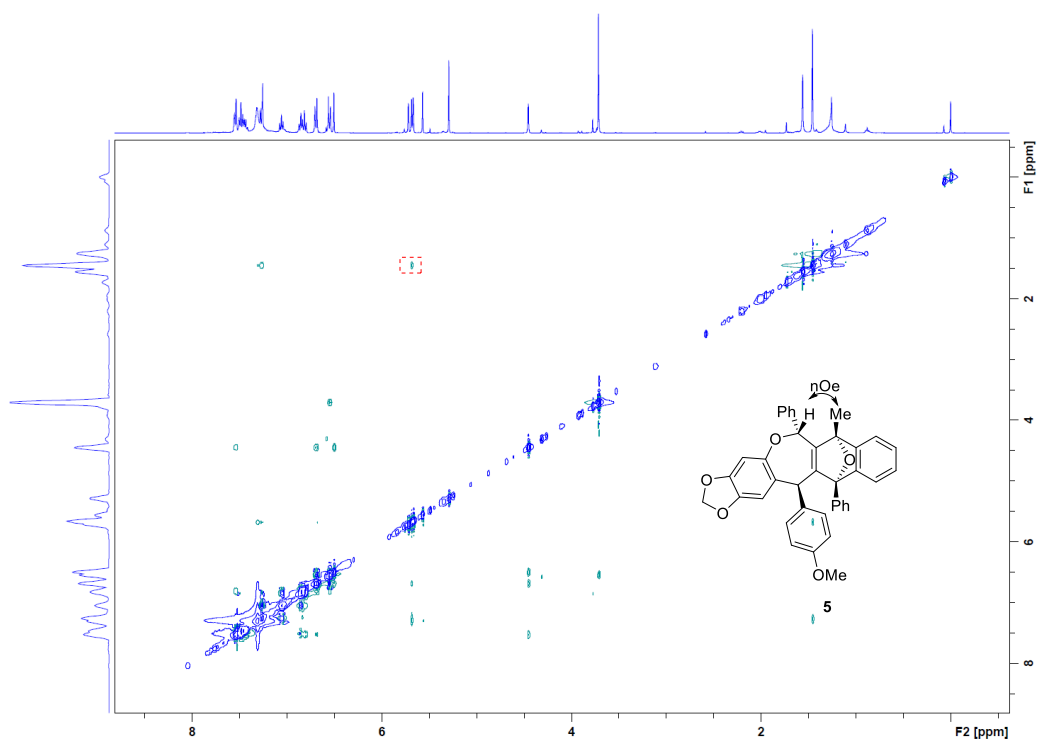

NOESY spectrum of **5** in CDCl<sub>3</sub>

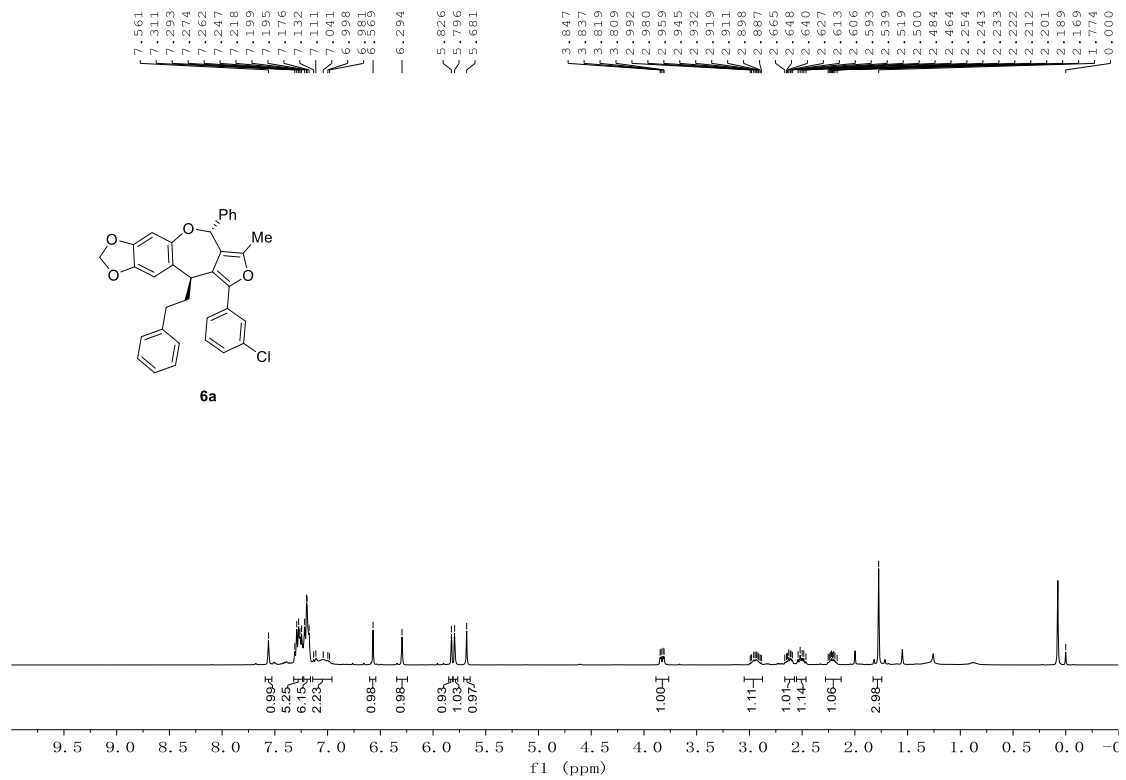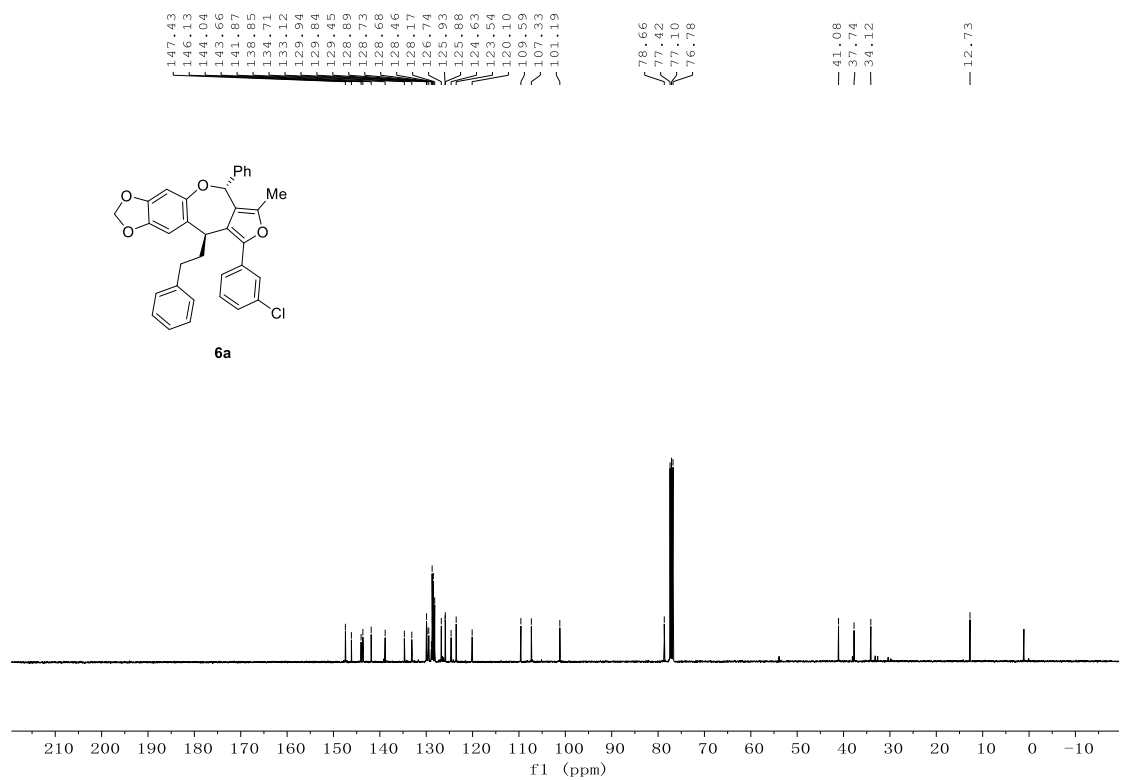



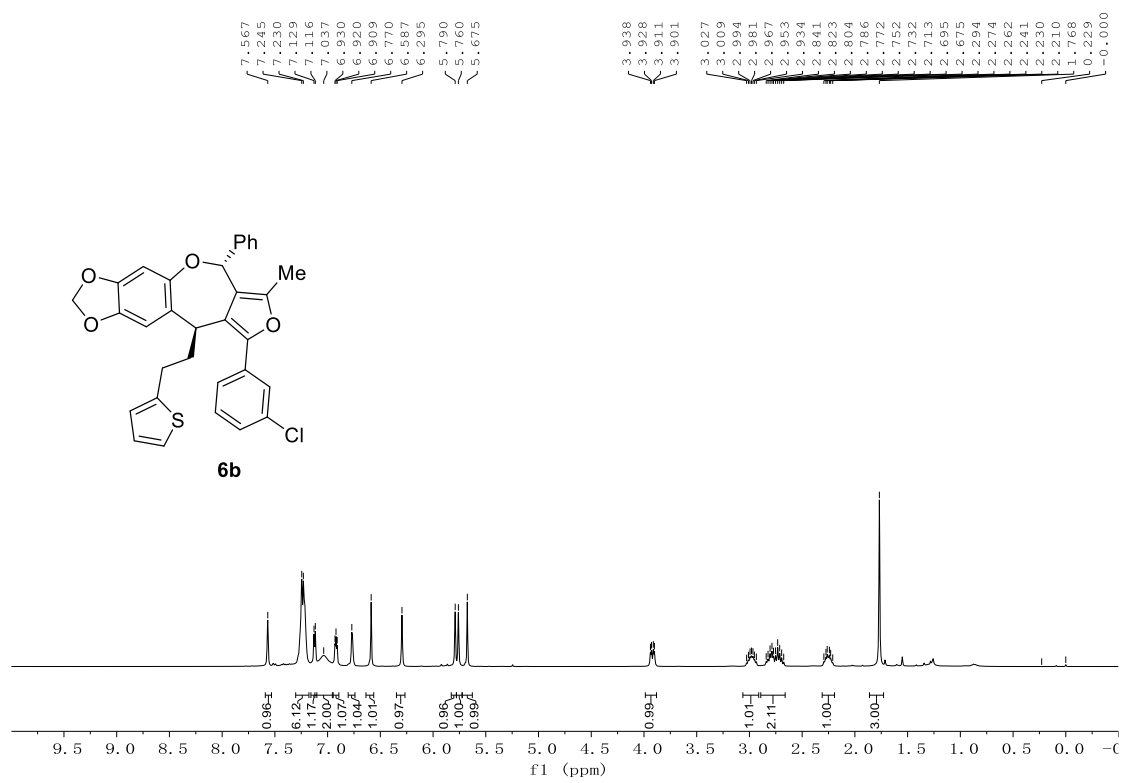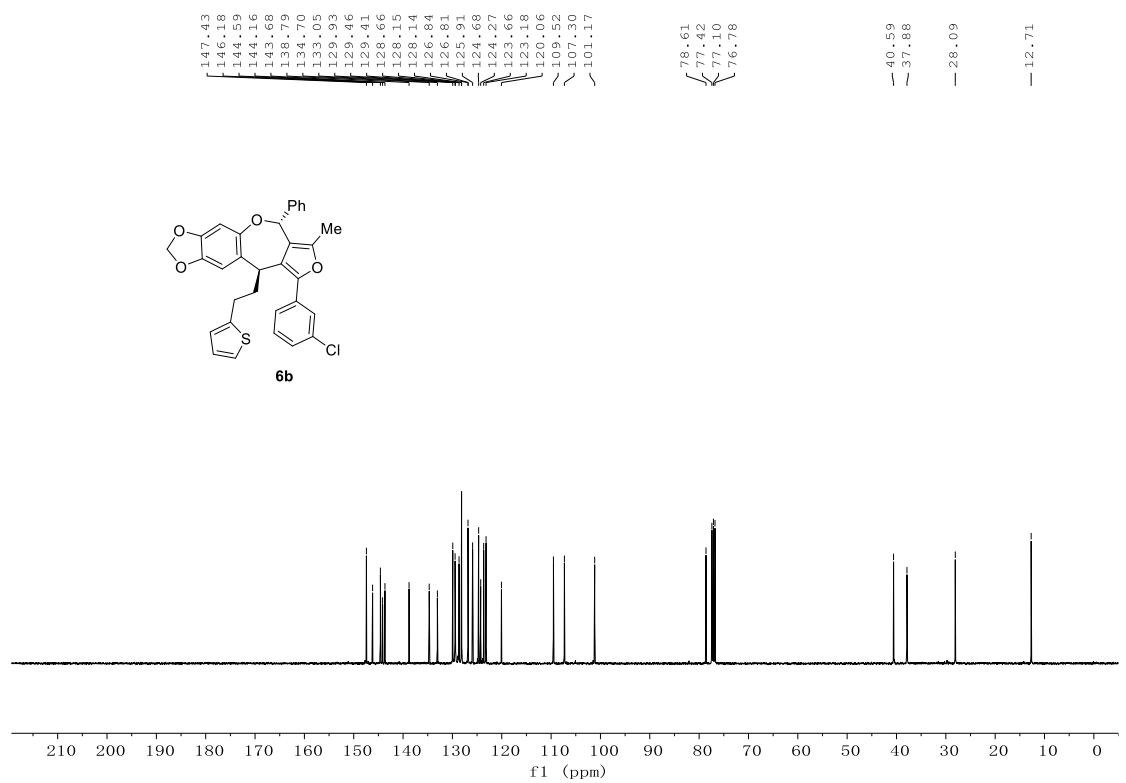

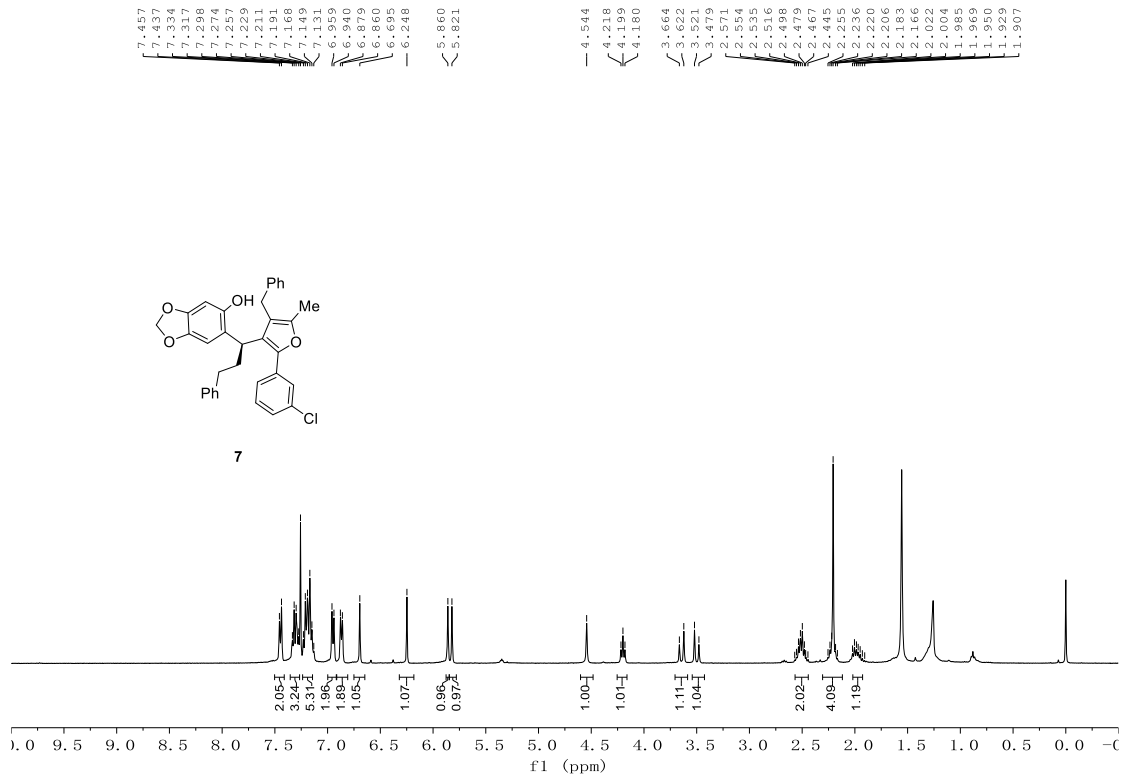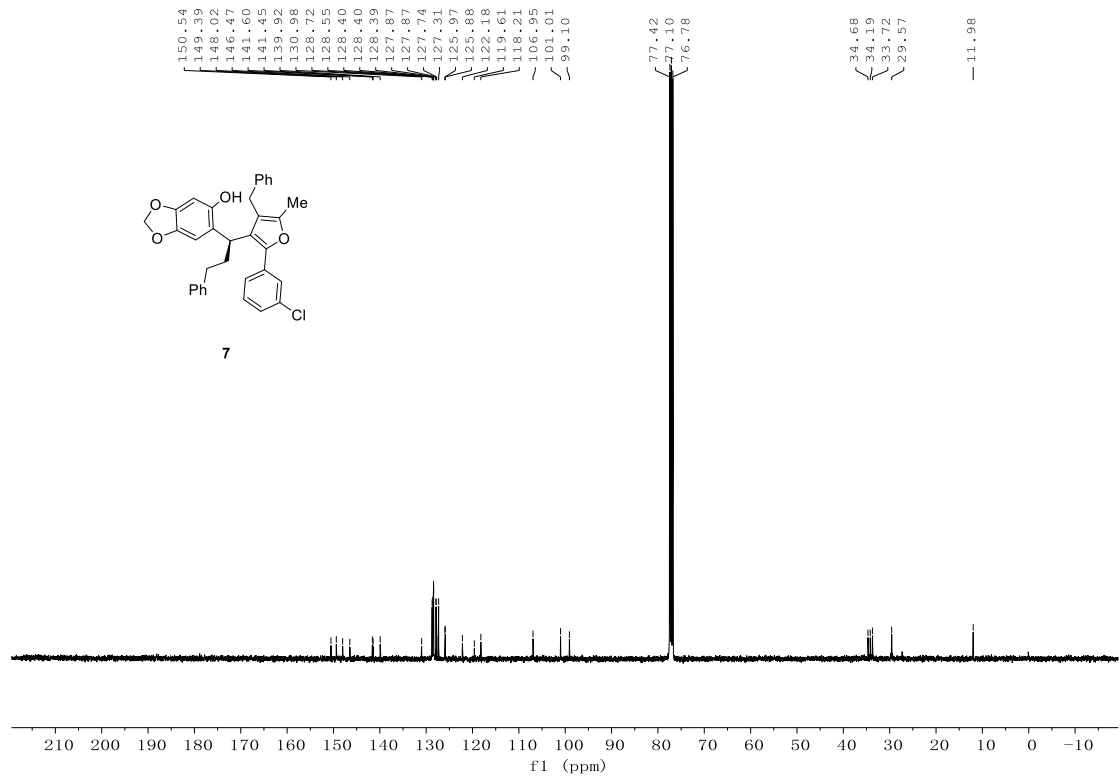

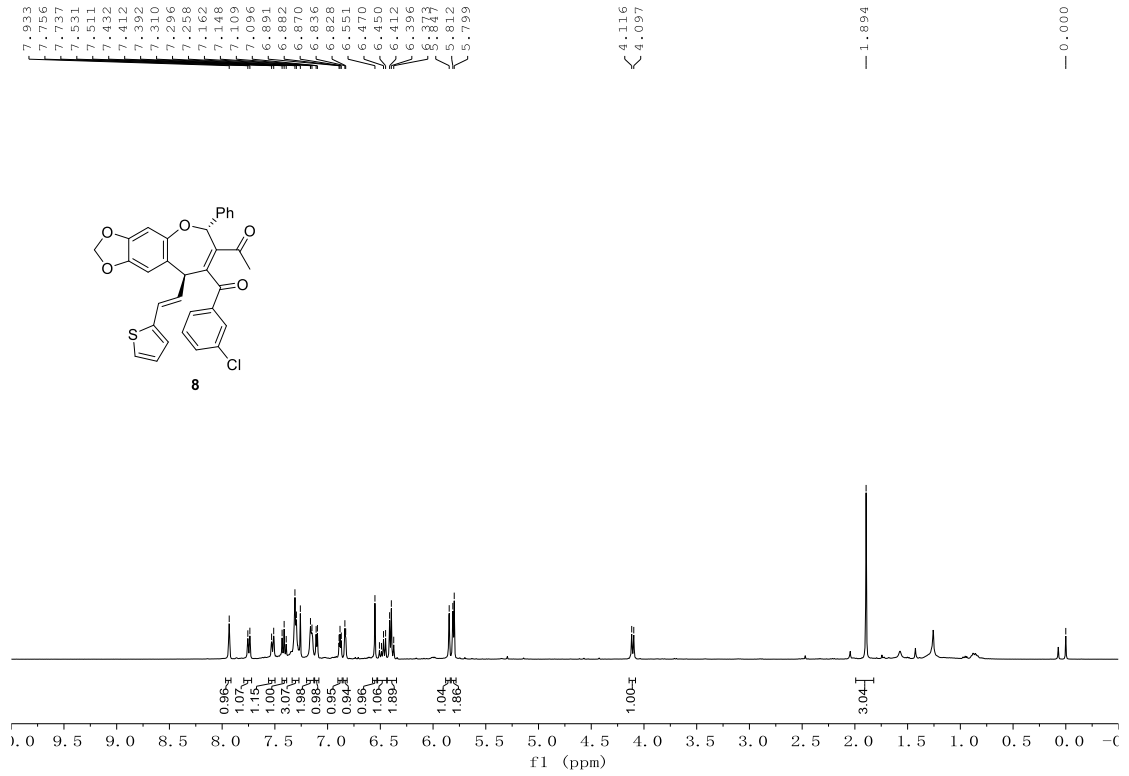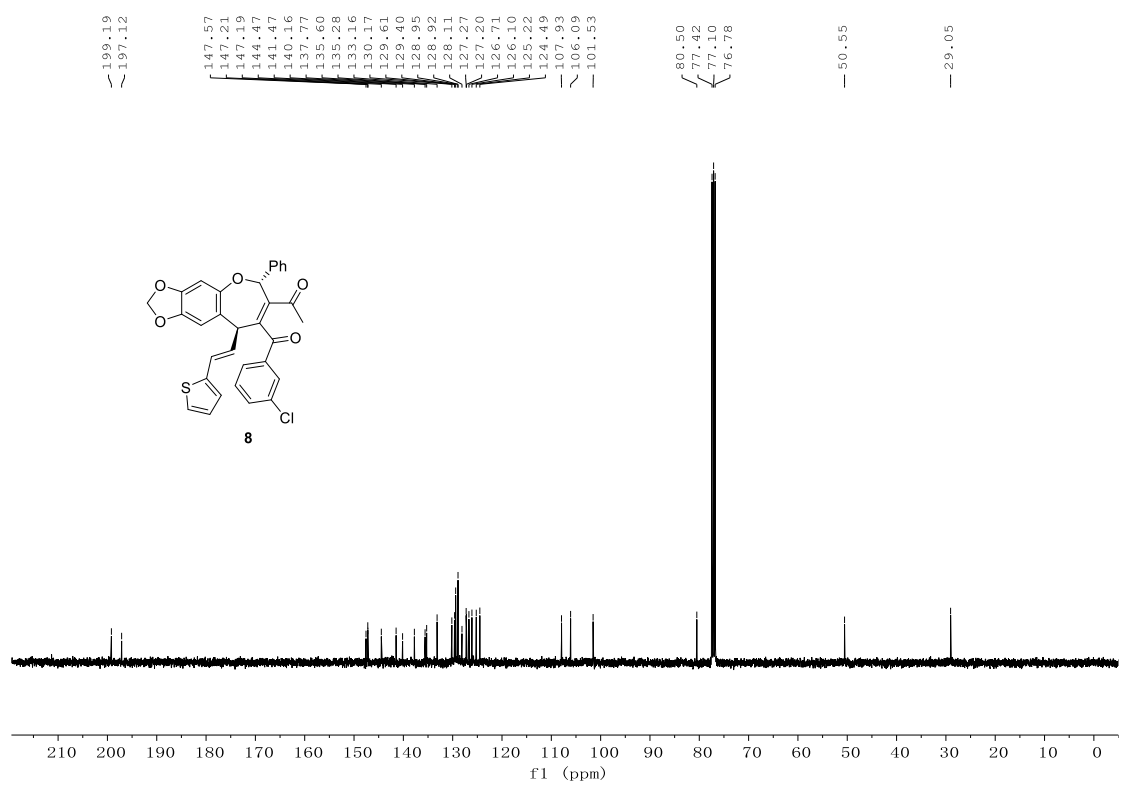

## 8. Copies of HPLC Chromatographs.

<Chromatogram>

mV

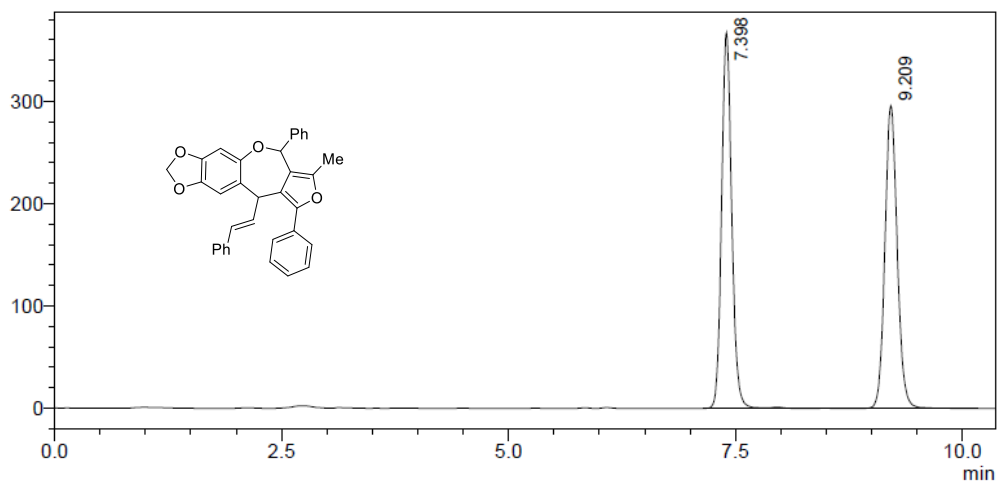

<Peak Table>

| Peak# | Ret. Time | Area    | Height | Area%   |
|-------|-----------|---------|--------|---------|
| 1     | 7.398     | 2869463 | 367708 | 50.641  |
| 2     | 9.209     | 2796866 | 296133 | 49.359  |
|       |           | 5666329 | 663841 | 100.000 |

<Chromatogram>

mV

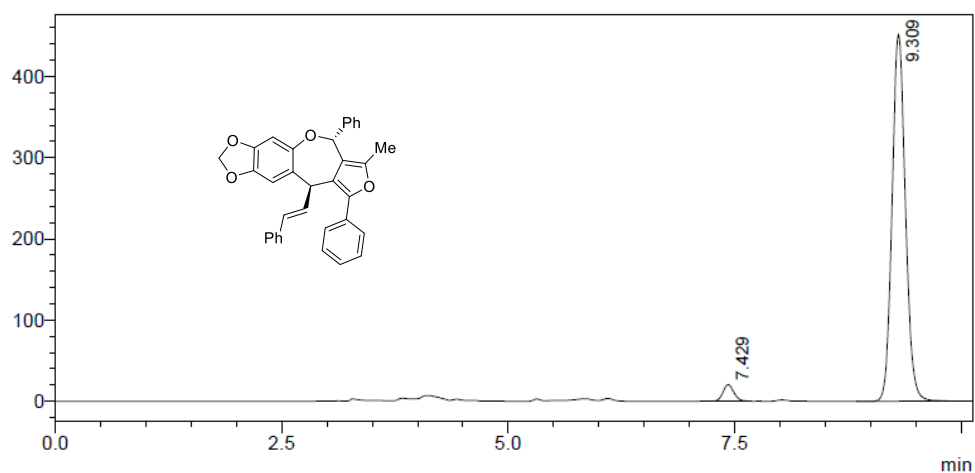

<Peak Table>

| Peak# | Ret. Time | Area    | Height | Area%   |
|-------|-----------|---------|--------|---------|
| 1     | 7.429     | 168623  | 20273  | 3.503   |
| 2     | 9.309     | 4644423 | 451561 | 96.497  |
|       |           | 4813046 | 471834 | 100.000 |

<Chromatogram>

mV

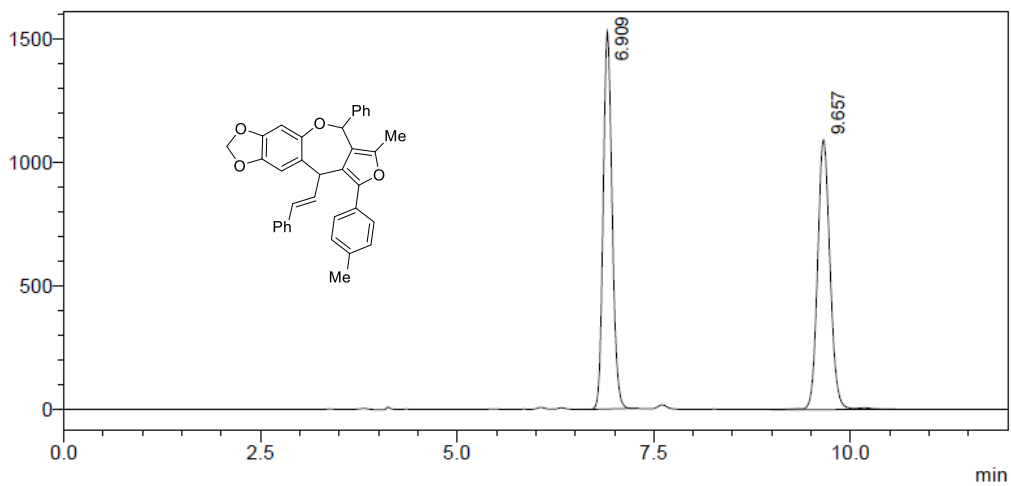

<Peak Table>

| Peak# | Ret. Time | Area     | Height  | Area%   |
|-------|-----------|----------|---------|---------|
| 1     | 6.909     | 12068742 | 1524303 | 49.933  |
| 2     | 9.657     | 12101174 | 1090499 | 50.067  |
|       |           | 24169916 | 2614802 | 100.000 |

mV

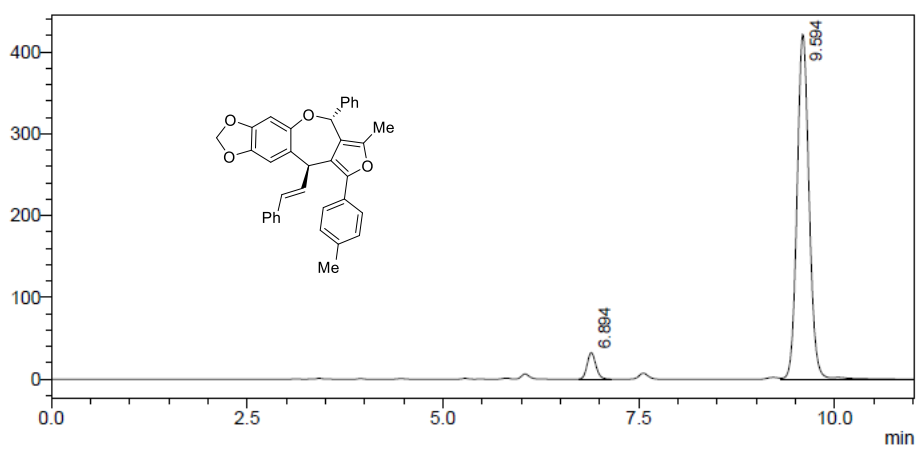

<Peak Table>

| Peak# | Ret. Time | Area    | Height | Area%   |
|-------|-----------|---------|--------|---------|
| 1     | 6.884     | 249470  | 32358  | 5.229   |
| 2     | 9.584     | 4521452 | 421547 | 94.771  |
|       |           | 4770921 | 453905 | 100.000 |

<Chromatogram>

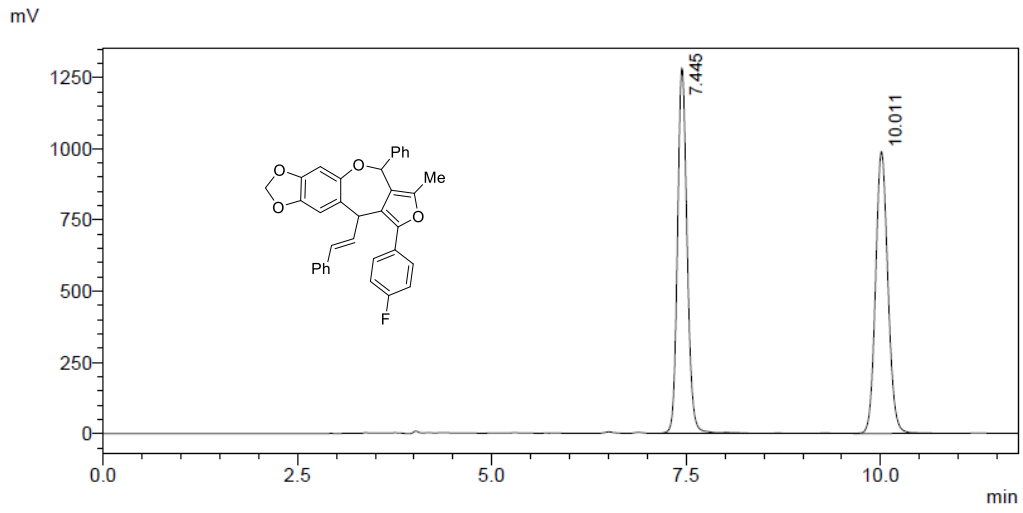

<Peak Table>

| Peak# | Ret. Time | Area     | Height  | Area%   |
|-------|-----------|----------|---------|---------|
| 1     | 7.445     | 11179122 | 1283301 | 50.534  |
| 2     | 10.011    | 10942974 | 989772  | 49.466  |
|       |           | 22122096 | 2273073 | 100.000 |

<Chromatogram>

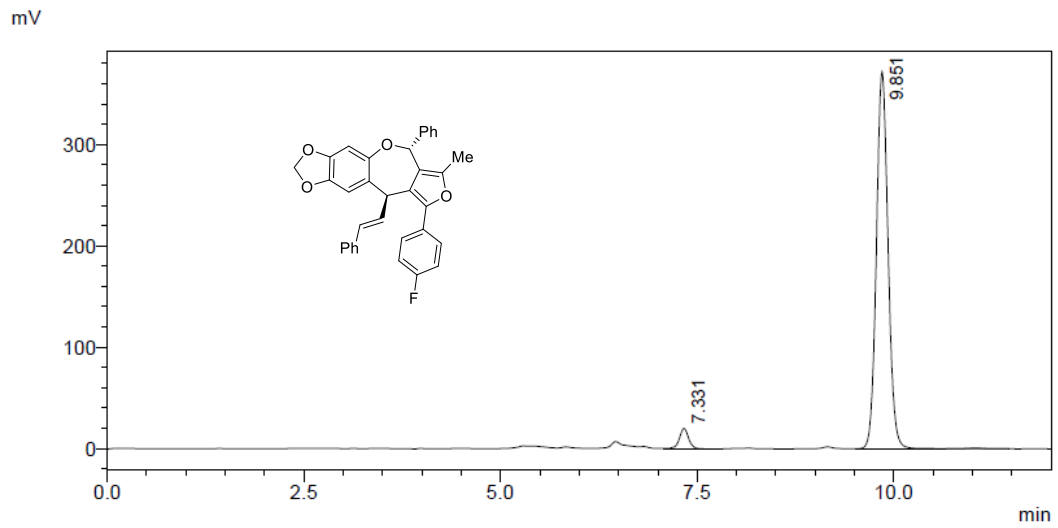

<Peak Table>

| Peak# | Ret. Time | Area    | Height | Area%   |
|-------|-----------|---------|--------|---------|
| 1     | 7.331     | 170457  | 20269  | 4.225   |
| 2     | 9.851     | 3863770 | 372242 | 95.775  |
|       |           | 4034227 | 392511 | 100.000 |

<Chromatogram>

mV

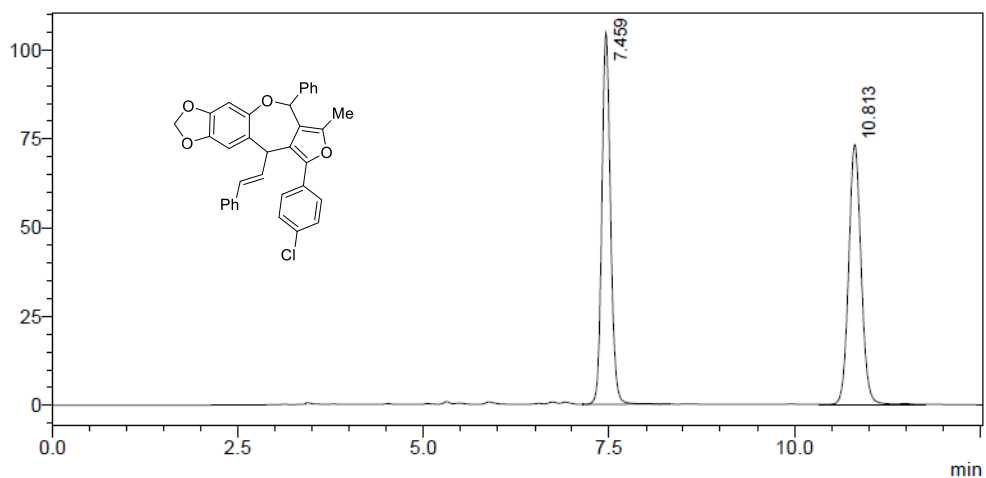

<Peak Table>

| Peak# | Ret. Time | Area    | Height | Area%   |
|-------|-----------|---------|--------|---------|
| 1     | 7.459     | 856777  | 104506 | 50.054  |
| 2     | 10.813    | 854932  | 73213  | 49.946  |
|       |           | 1711709 | 177718 | 100.000 |

<Chromatogram>

mV

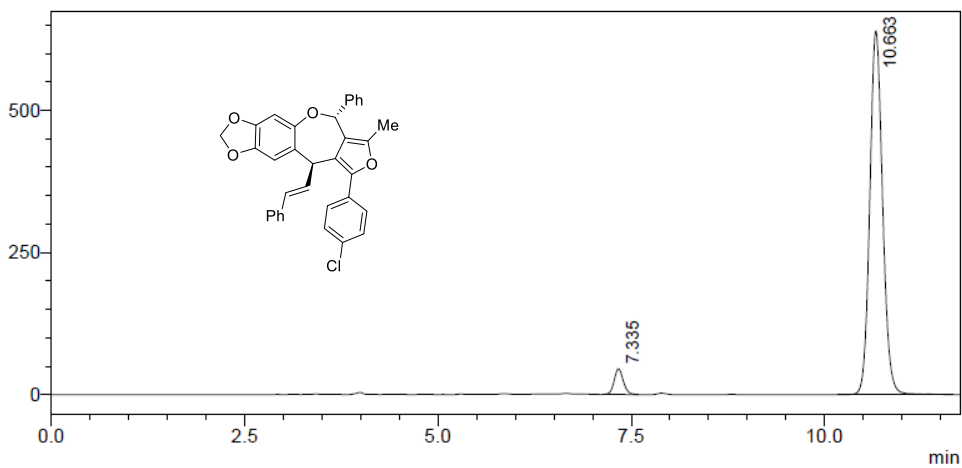

<Peak Table>

| Peak# | Ret. Time | Area    | Height | Area%   |
|-------|-----------|---------|--------|---------|
| 1     | 7.335     | 364972  | 44892  | 4.720   |
| 2     | 10.663    | 7367793 | 639074 | 95.280  |
|       |           | 7732766 | 683966 | 100.000 |

<Chromatogram>

mV

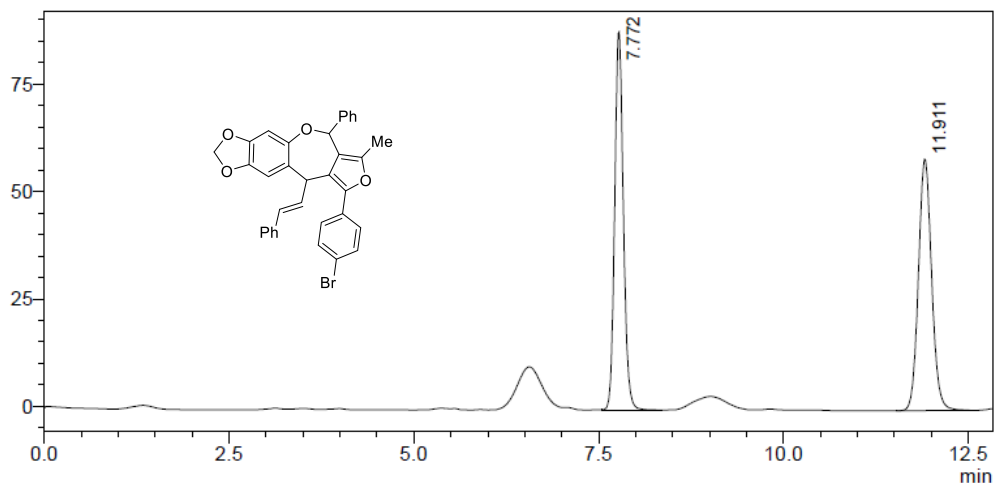

<Peak Table>

| Peak# | Ret. Time | Area    | Height | Area%   |
|-------|-----------|---------|--------|---------|
| 1     | 7.772     | 722675  | 88004  | 49.799  |
| 2     | 11.911    | 728519  | 58476  | 50.201  |
|       |           | 1451195 | 146480 | 100.000 |

<Chromatogram>

mV

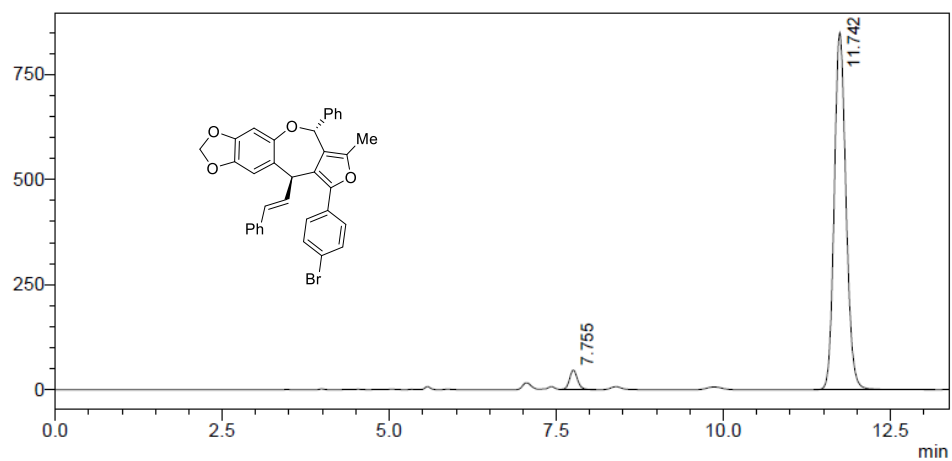

<Peak Table>

| Peak# | Ret. Time | Area     | Height | Area%   |
|-------|-----------|----------|--------|---------|
| 1     | 7.755     | 394675   | 46622  | 3.647   |
| 2     | 11.742    | 10428667 | 849369 | 96.353  |
|       |           | 10823342 | 895991 | 100.000 |



<Chromatogram>

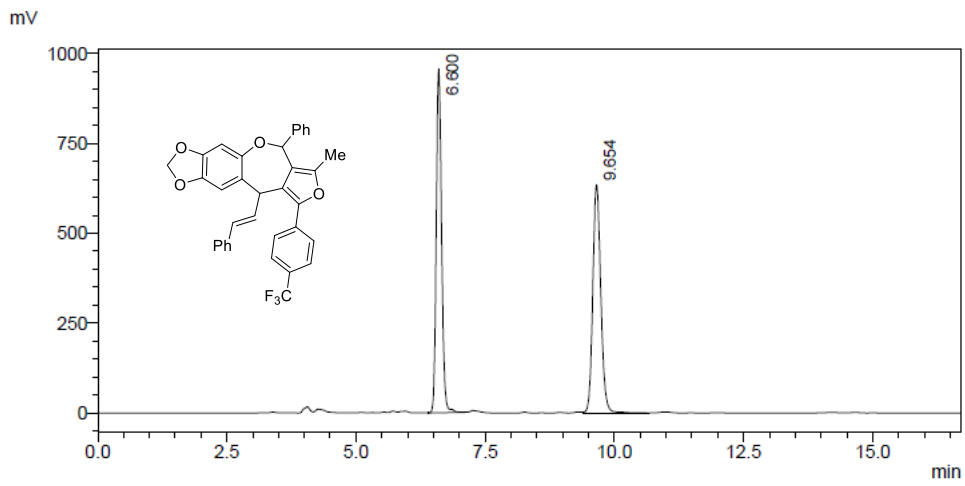

<Peak Table>

| Peak# | Ret. Time | Area     | Height  | Area%   |
|-------|-----------|----------|---------|---------|
| 1     | 6.600     | 6845518  | 957900  | 50.020  |
| 2     | 9.654     | 6839914  | 634586  | 49.980  |
|       |           | 13685432 | 1592486 | 100.000 |

<Chromatogram>

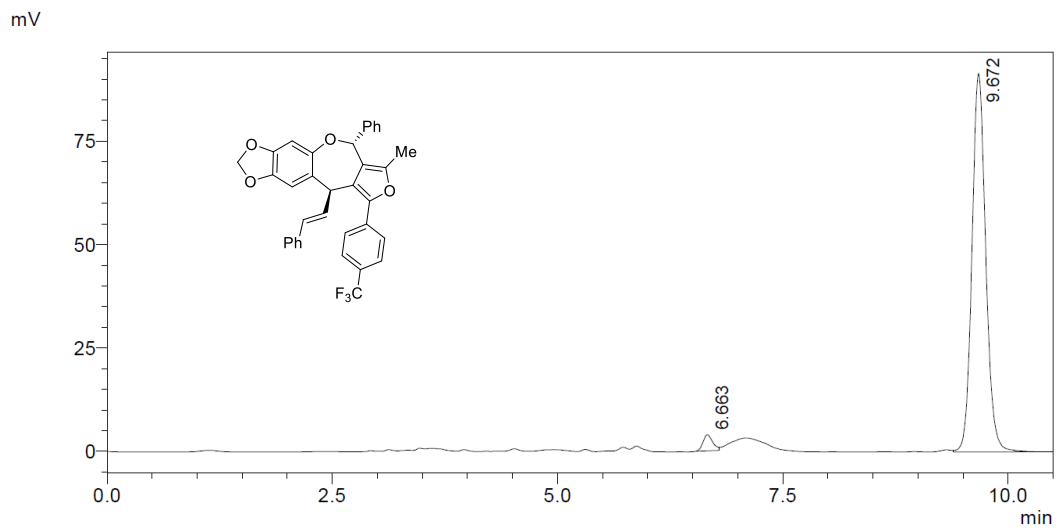

<Peak Table>

| Peak# | Ret. Time | Area    | Height | Area%   |
|-------|-----------|---------|--------|---------|
| 1     | 6.663     | 29100   | 3882   | 2.803   |
| 2     | 9.672     | 1009084 | 91551  | 97.197  |
|       |           | 1038184 | 95433  | 100.000 |

<Chromatogram>

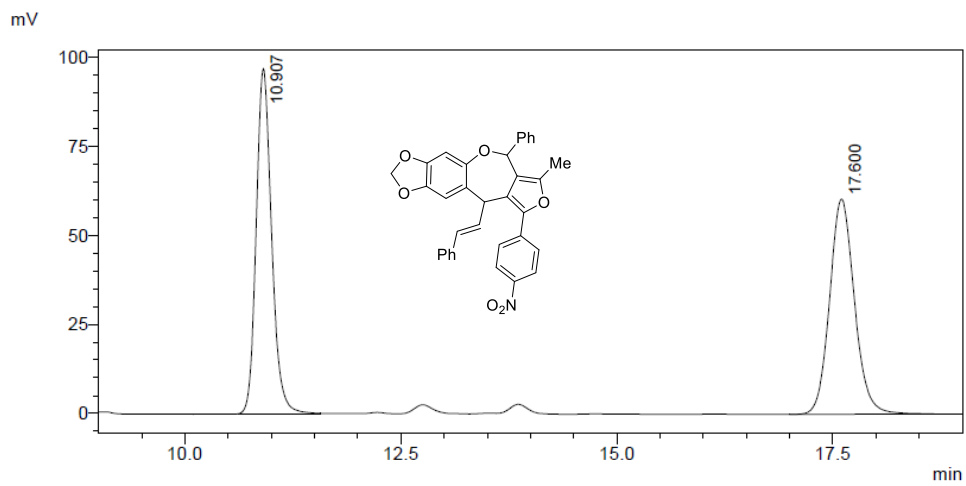

<Peak Table>

| Peak# | Ret. Time | Area    | Height | Area%   |
|-------|-----------|---------|--------|---------|
| 1     | 10.907    | 1206944 | 96921  | 49.885  |
| 2     | 17.600    | 1212516 | 60425  | 50.115  |
|       |           | 2419460 | 157346 | 100.000 |

<Chromatogram>

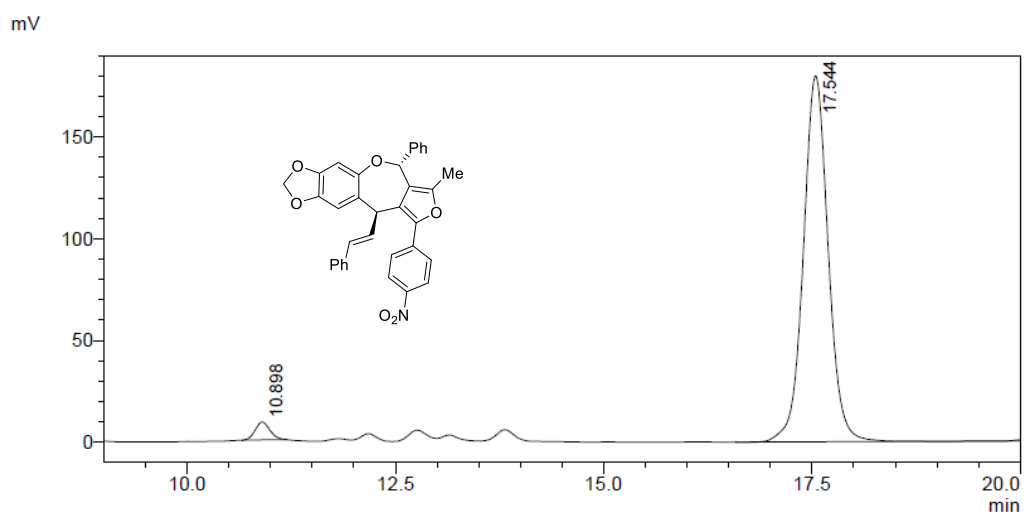

<Peak Table>

| Peak# | Ret. Time | Area    | Height | Area%   |
|-------|-----------|---------|--------|---------|
| 1     | 10.898    | 108151  | 8757   | 2.818   |
| 2     | 17.544    | 3730291 | 179953 | 97.182  |
|       |           | 3838442 | 188709 | 100.000 |

<Chromatogram>

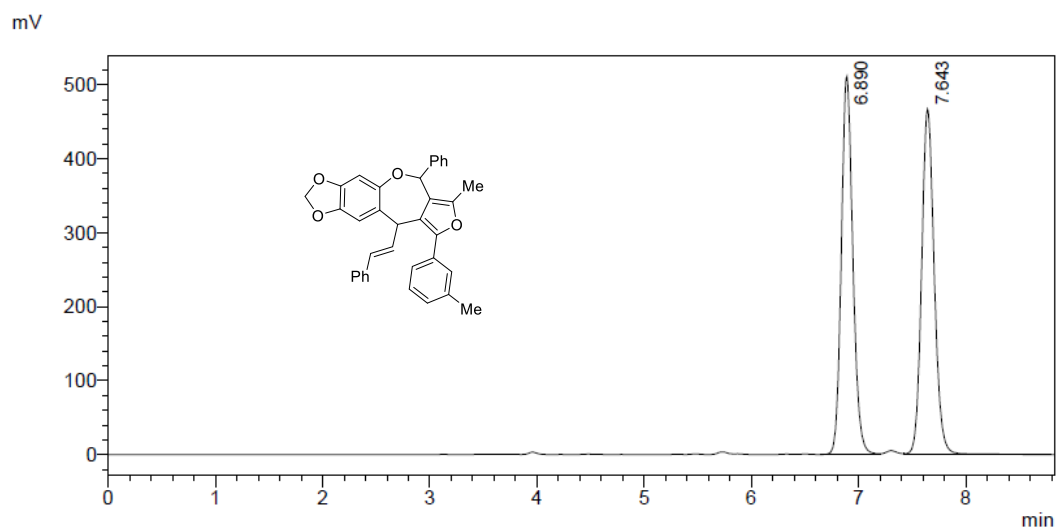

<Peak Table>

| Peak# | Ret. Time | Area    | Height | Area%   |
|-------|-----------|---------|--------|---------|
| 1     | 6.890     | 3841211 | 511330 | 50.090  |
| 2     | 7.643     | 3827361 | 466785 | 49.910  |
|       |           | 7668572 | 978115 | 100.000 |

<Chromatogram>

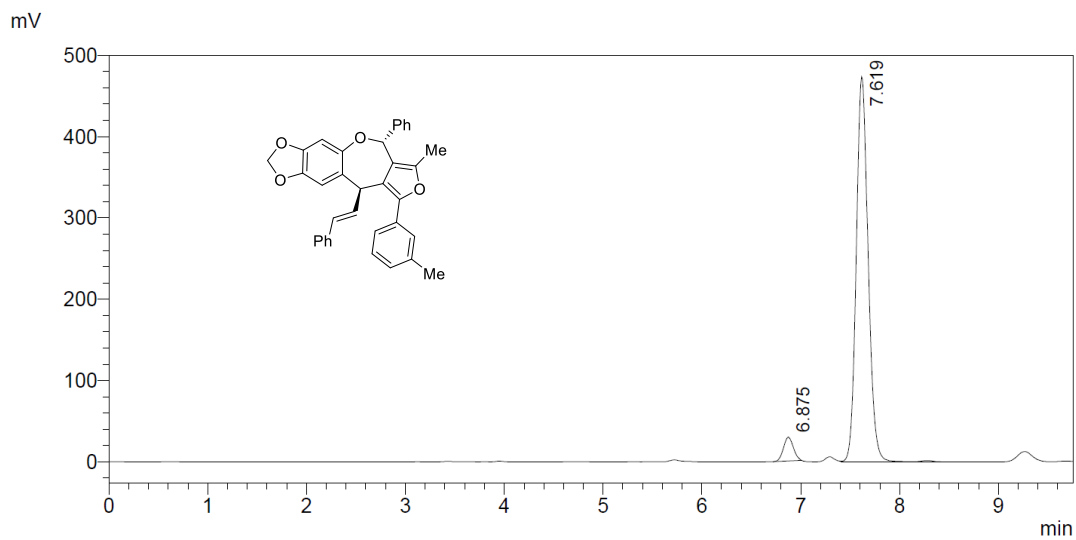

<Peak Table>

| Peak# | Ret. Time | Area    | Height | Area%   |
|-------|-----------|---------|--------|---------|
| 1     | 6.875     | 205088  | 29275  | 4.950   |
| 2     | 7.619     | 3938388 | 474071 | 95.050  |
|       |           | 4143476 | 503346 | 100.000 |

<Chromatogram>

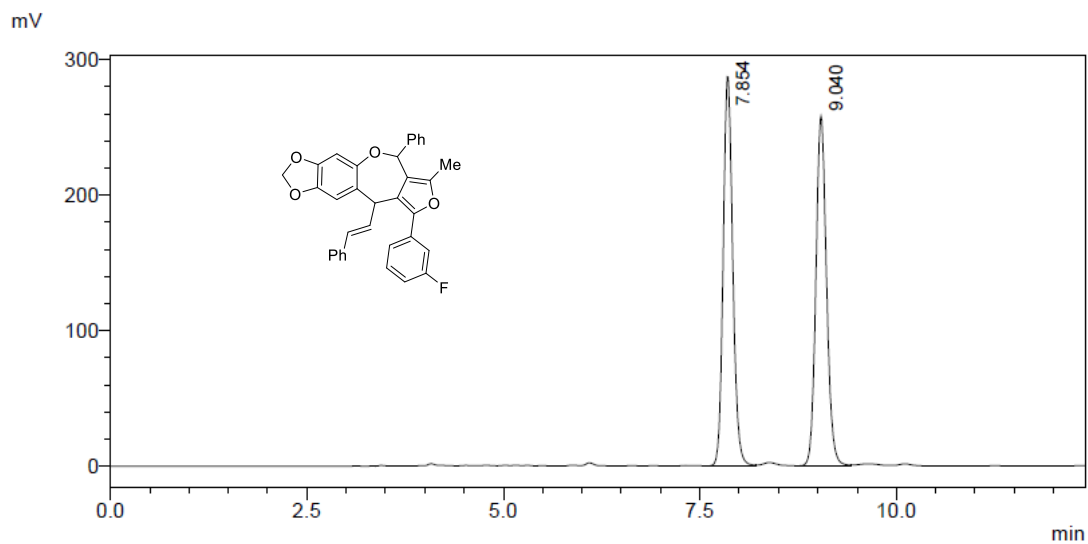

<Peak Table>

| Peak# | Ret. Time | Area    | Height | Area%   |
|-------|-----------|---------|--------|---------|
| 1     | 7.854     | 2437640 | 287518 | 49.989  |
| 2     | 9.040     | 2438672 | 258161 | 50.011  |
|       |           | 4876312 | 545679 | 100.000 |

<Chromatogram>

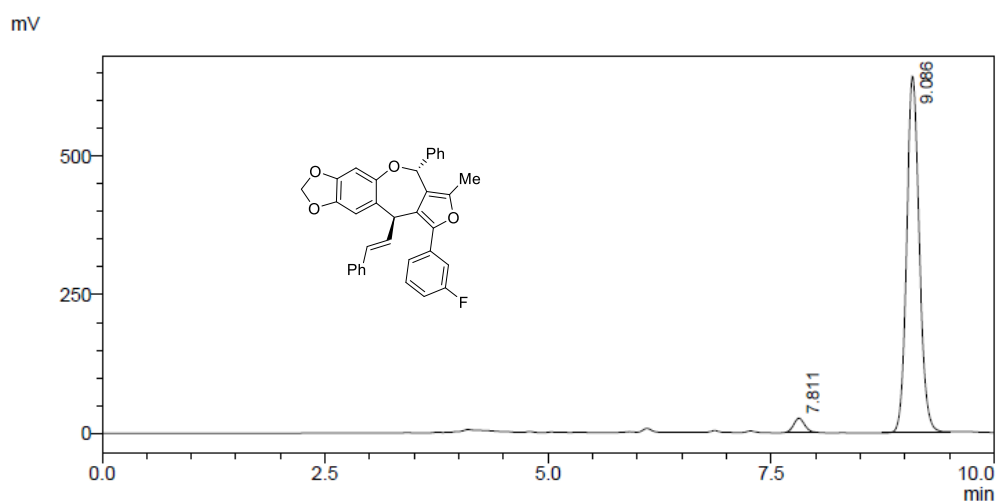

<Peak Table>

| Peak# | Ret. Time | Area    | Height | Area%   |
|-------|-----------|---------|--------|---------|
| 1     | 7.811     | 223328  | 25954  | 3.383   |
| 2     | 9.086     | 6378278 | 644327 | 96.617  |
|       |           | 6601606 | 670281 | 100.000 |

<Chromatogram>

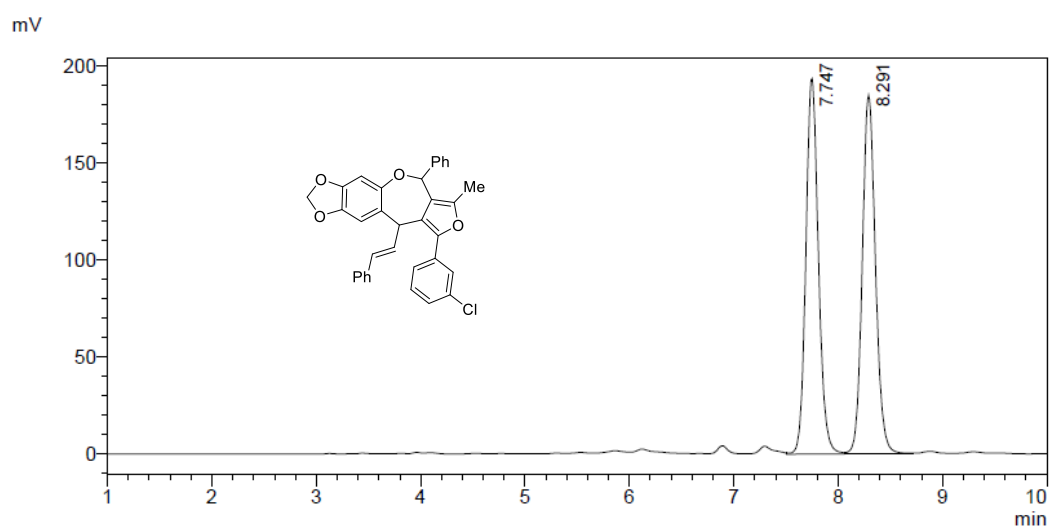

<Peak Table>

| Peak# | Ret. Time | Area    | Height | Area%   |
|-------|-----------|---------|--------|---------|
| 1     | 7.747     | 1619090 | 193658 | 49.871  |
| 2     | 8.291     | 1627447 | 185043 | 50.129  |
|       |           | 3246537 | 378701 | 100.000 |

<Chromatogram>

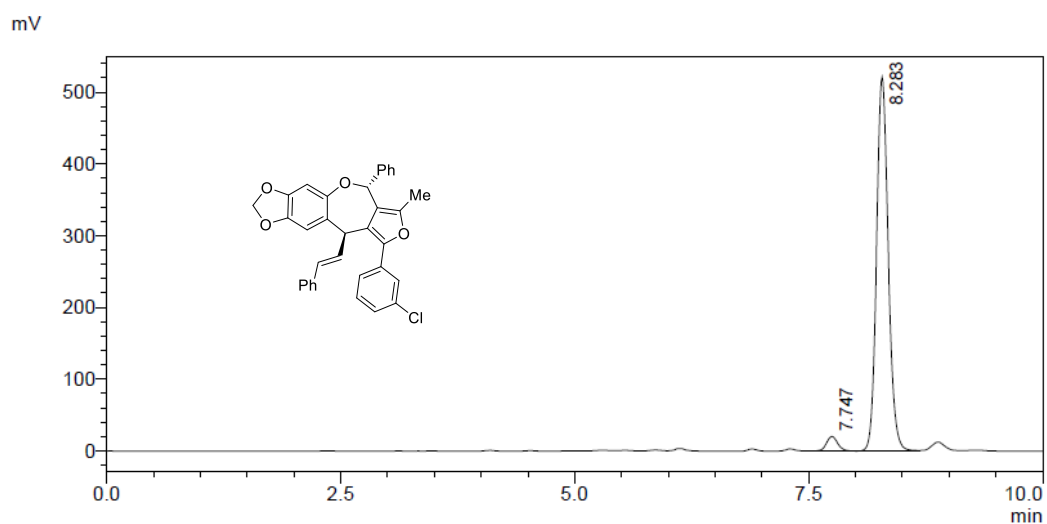

<Peak Table>

| Peak# | Ret. Time | Area    | Height | Area%   |
|-------|-----------|---------|--------|---------|
| 1     | 7.747     | 176723  | 20519  | 3.738   |
| 2     | 8.283     | 4551166 | 521716 | 96.262  |
|       |           | 4727889 | 542234 | 100.000 |

<Chromatogram>

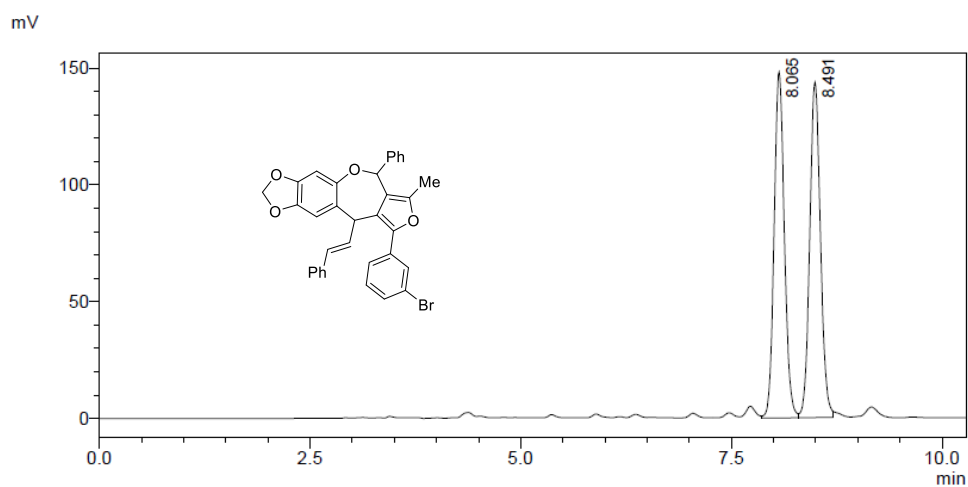

<Peak Table>

| Peak# | Ret. Time | Area    | Height | Area%   |
|-------|-----------|---------|--------|---------|
| 1     | 8.065     | 1250873 | 148079 | 49.605  |
| 2     | 8.491     | 1270785 | 143513 | 50.395  |
|       |           | 2521658 | 291592 | 100.000 |

<Chromatogram>

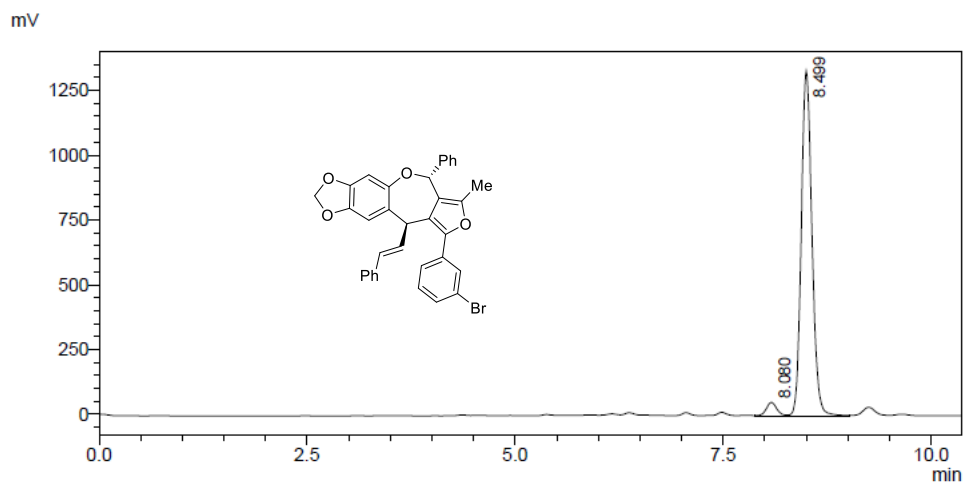

<Peak Table>

| Peak# | Ret. Time | Area     | Height  | Area%   |
|-------|-----------|----------|---------|---------|
| 1     | 8.080     | 453452   | 51730   | 3.674   |
| 2     | 8.499     | 11887947 | 1331899 | 96.326  |
|       |           | 12341399 | 1383628 | 100.000 |

<Chromatogram>

mV

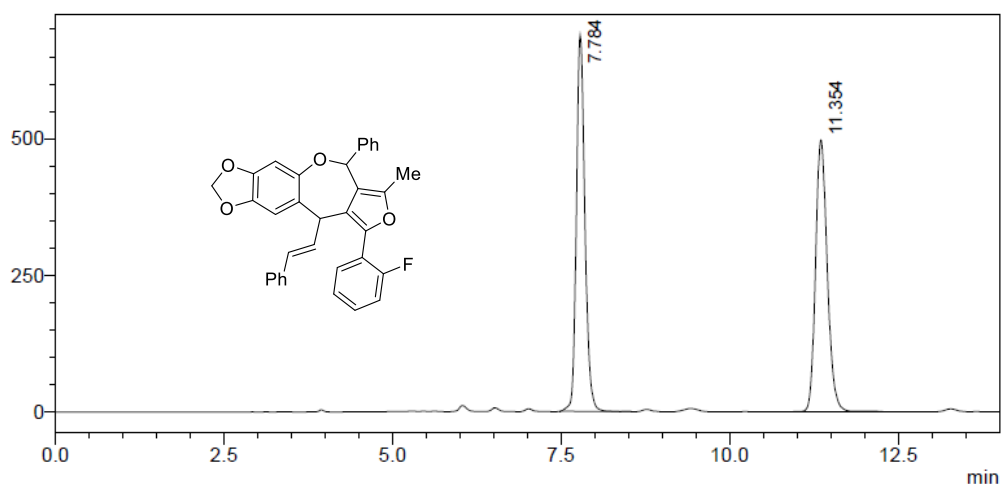

<Peak Table>

| Peak# | Ret. Time | Area     | Height  | Area%   |
|-------|-----------|----------|---------|---------|
| 1     | 7.784     | 6057953  | 688430  | 50.100  |
| 2     | 11.354    | 6033822  | 497007  | 49.900  |
|       |           | 12091775 | 1185437 | 100.000 |

<Chromatogram>

mV

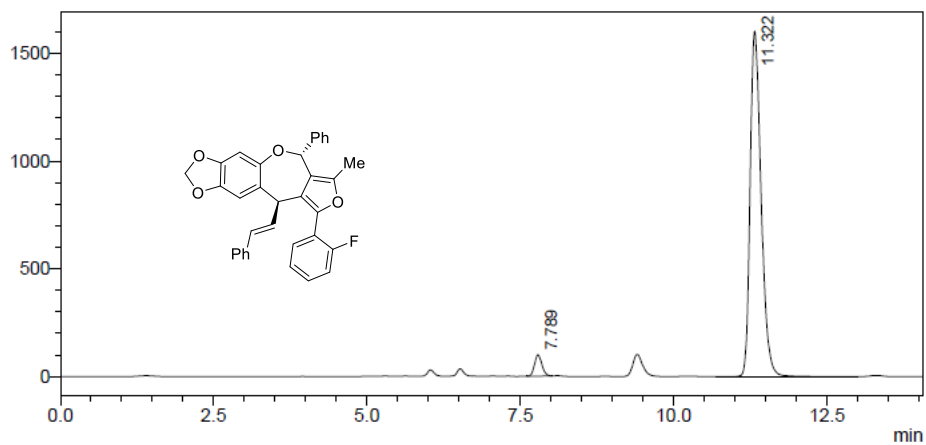

<Peak Table>

| Peak# | Ret. Time | Area     | Height  | Area%   |
|-------|-----------|----------|---------|---------|
| 1     | 7.789     | 832117   | 98885   | 4.006   |
| 2     | 11.322    | 19941670 | 1601472 | 95.994  |
|       |           | 20773787 | 1700357 | 100.000 |

<Chromatogram>

mV

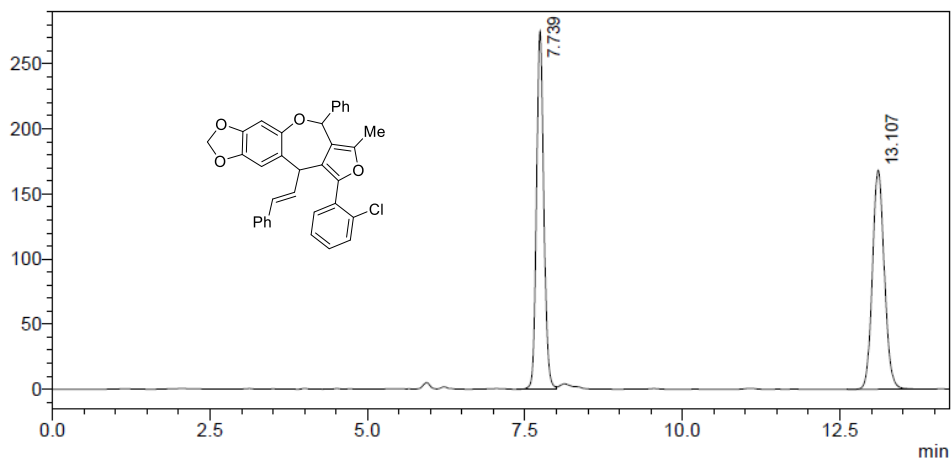

<Peak Table>

| Peak# | Ret. Time | Area    | Height | Area%   |
|-------|-----------|---------|--------|---------|
| 1     | 7.739     | 2230541 | 275125 | 50.126  |
| 2     | 13.107    | 2219362 | 168190 | 49.874  |
|       |           | 4449903 | 443314 | 100.000 |

<Chromatogram>

mV

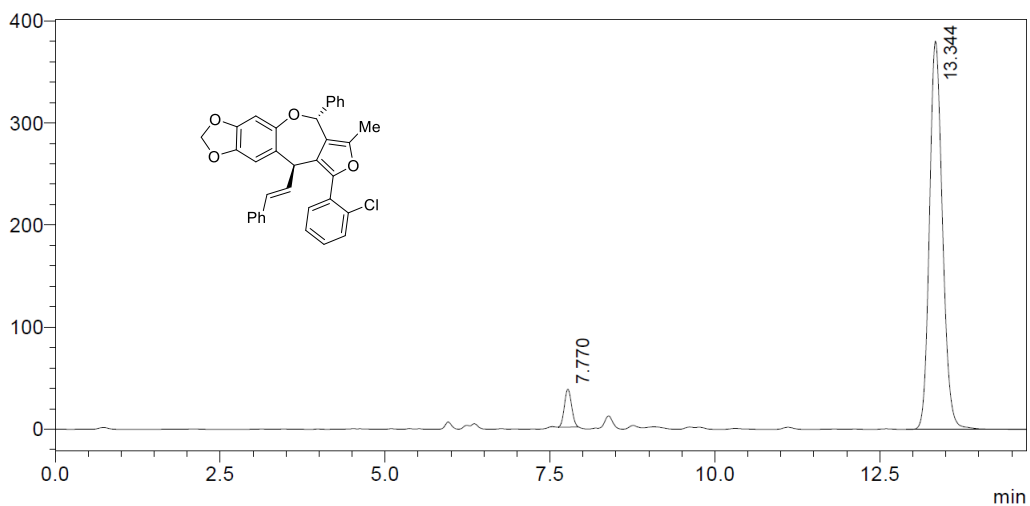

<Peak Table>

| Peak# | Ret. Time | Area    | Height | Area%   |
|-------|-----------|---------|--------|---------|
| 1     | 7.770     | 283626  | 37201  | 5.155   |
| 2     | 13.344    | 5218163 | 380221 | 94.845  |
|       |           | 5501789 | 417422 | 100.000 |



<Chromatogram>

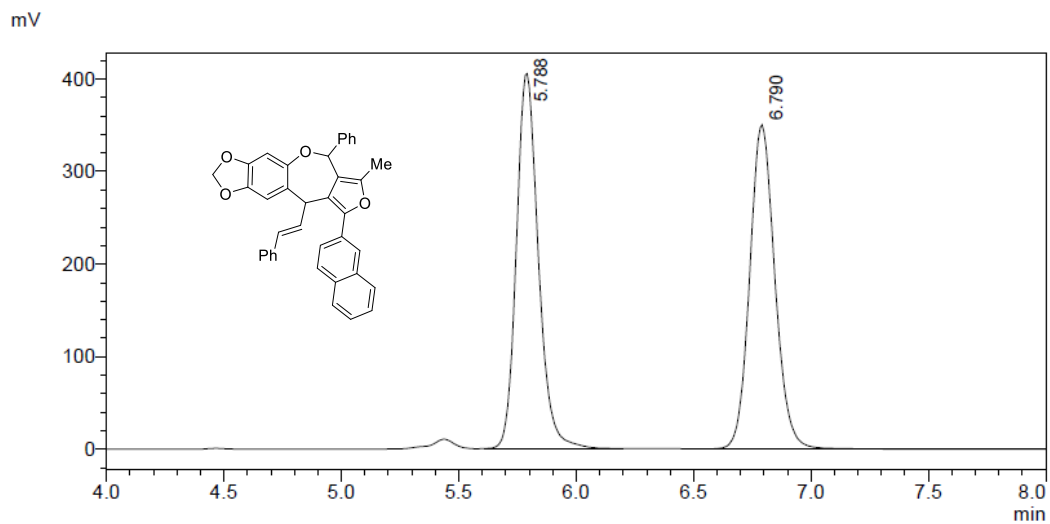

<Peak Table>

| Peak# | Ret. Time | Area    | Height | Area%   |
|-------|-----------|---------|--------|---------|
| 1     | 5.788     | 2637999 | 405280 | 50.100  |
| 2     | 6.790     | 2627495 | 350419 | 49.900  |
|       |           | 5265494 | 755699 | 100.000 |

<Chromatogram>

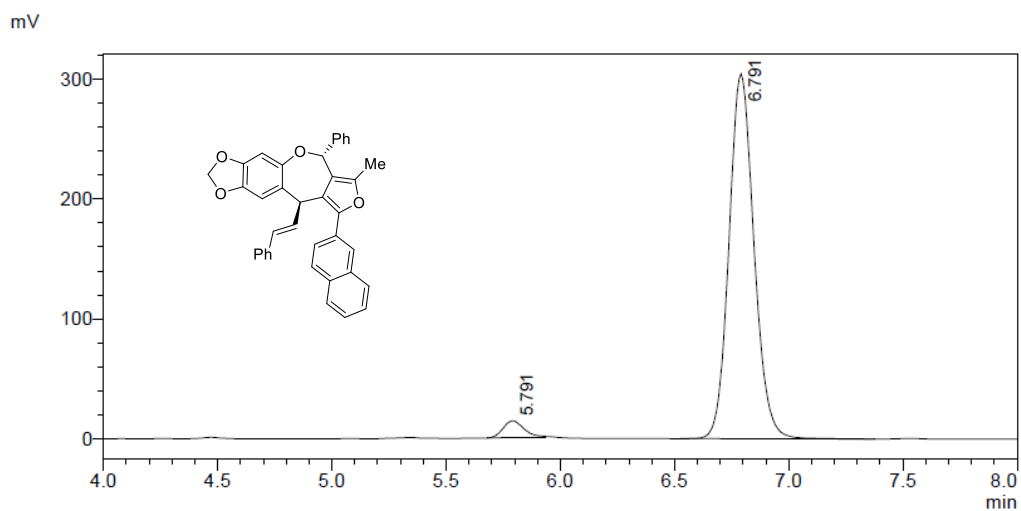

<Peak Table>

| Peak# | Ret. Time | Area    | Height | Area%   |
|-------|-----------|---------|--------|---------|
| 1     | 5.791     | 89997   | 13985  | 3.740   |
| 2     | 6.791     | 2316513 | 304636 | 96.260  |
|       |           | 2406510 | 318620 | 100.000 |

<Chromatogram>

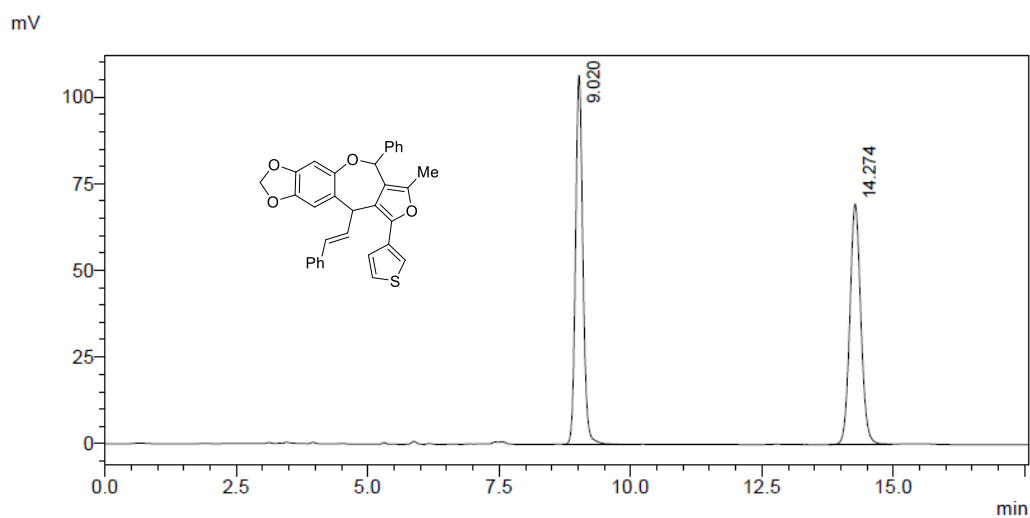

<Peak Table>

| Peak# | Ret. Time | Area    | Height | Area%   |
|-------|-----------|---------|--------|---------|
| 1     | 9.020     | 1028822 | 106372 | 50.394  |
| 2     | 14.274    | 1012720 | 69396  | 49.606  |
|       |           | 2041542 | 175768 | 100.000 |

<Chromatogram>

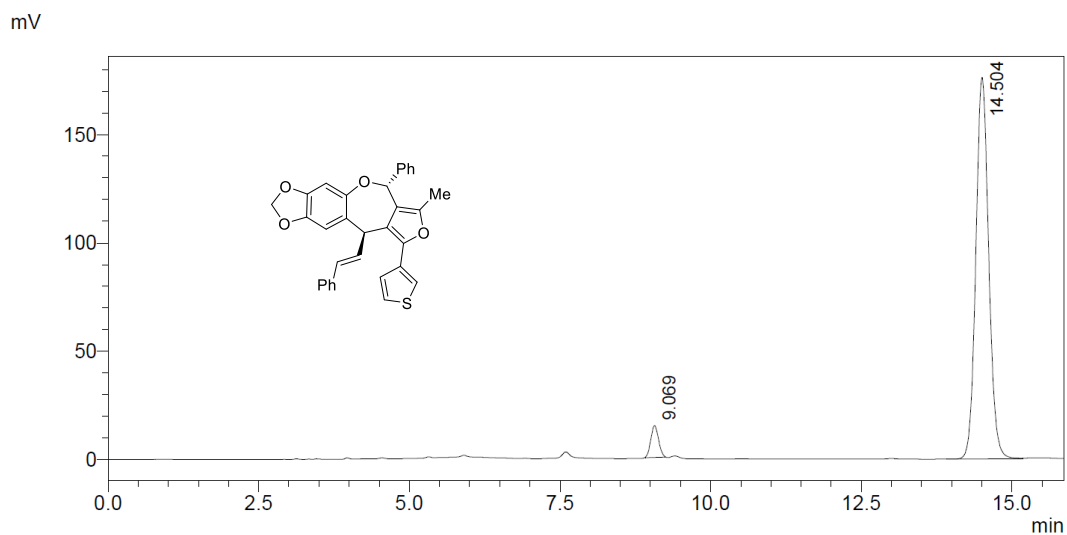

<Peak Table>

| Peak# | Ret. Time | Area    | Height | Area%   |
|-------|-----------|---------|--------|---------|
| 1     | 9.069     | 132648  | 14717  | 4.823   |
| 2     | 14.504    | 2617471 | 176111 | 95.177  |
|       |           | 2750119 | 190828 | 100.000 |

<Chromatogram>

mV

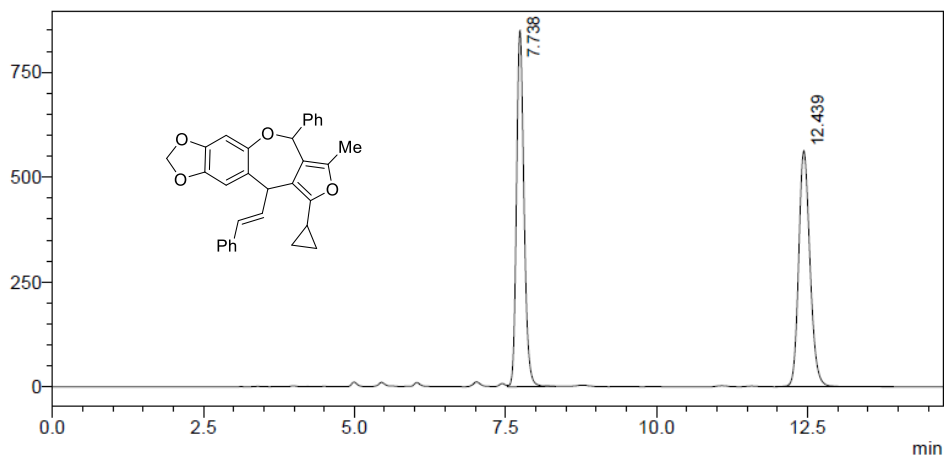

<Peak Table>

| Peak# | Ret. Time | Area     | Height  | Area%   |
|-------|-----------|----------|---------|---------|
| 1     | 7.738     | 7321574  | 848735  | 50.016  |
| 2     | 12.439    | 7316970  | 562191  | 49.984  |
|       |           | 14638544 | 1410926 | 100.000 |

<Chromatogram>

mV

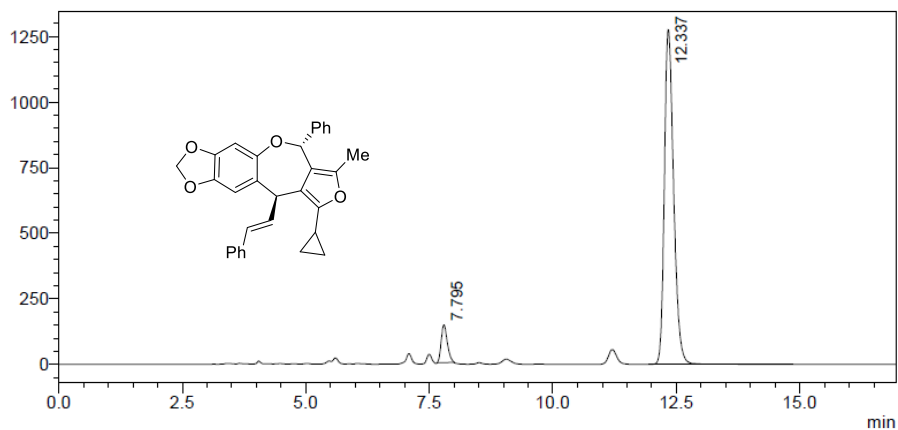

<Peak Table>

| Peak# | Ret. Time | Area     | Height  | Area%   |
|-------|-----------|----------|---------|---------|
| 1     | 7.795     | 1252278  | 144274  | 6.957   |
| 2     | 12.337    | 16747245 | 1276360 | 93.043  |
|       |           | 17999524 | 1420634 | 100.000 |

<Chromatogram>

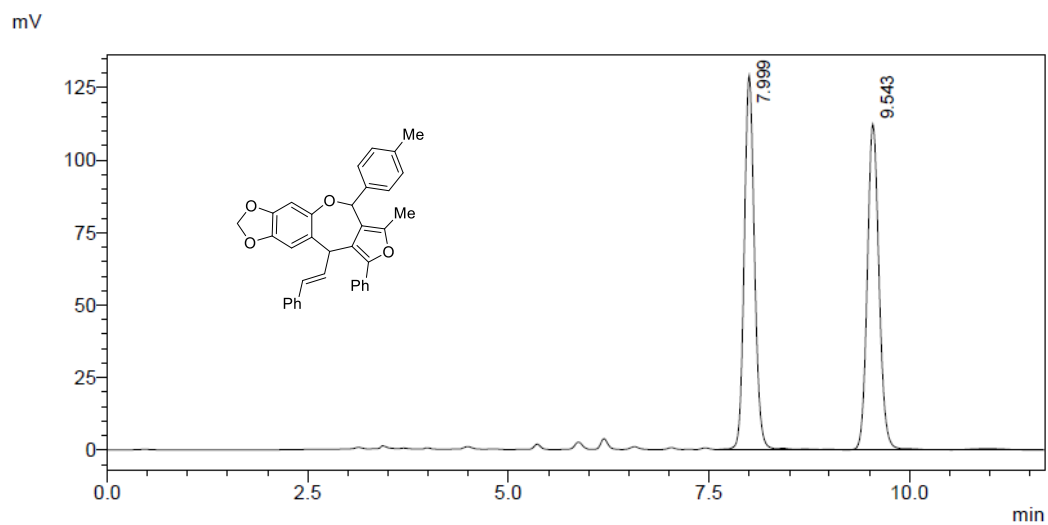

<Peak Table>

| Peak# | Ret. Time | Area    | Height | Area%   |
|-------|-----------|---------|--------|---------|
| 1     | 7.999     | 1154705 | 129336 | 49.999  |
| 2     | 9.543     | 1154743 | 112377 | 50.001  |
|       |           | 2309447 | 241713 | 100.000 |

<Chromatogram>

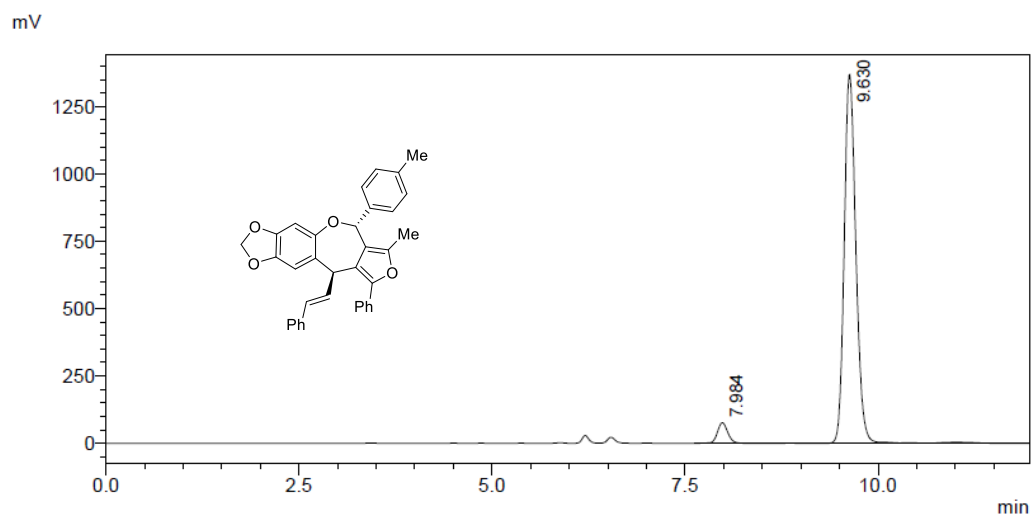

<Peak Table>

| Peak# | Ret. Time | Area     | Height  | Area%   |
|-------|-----------|----------|---------|---------|
| 1     | 7.984     | 739000   | 76850   | 4.845   |
| 2     | 9.630     | 14513920 | 1367453 | 95.155  |
|       |           | 15252919 | 1444303 | 100.000 |

<Chromatogram>

mV

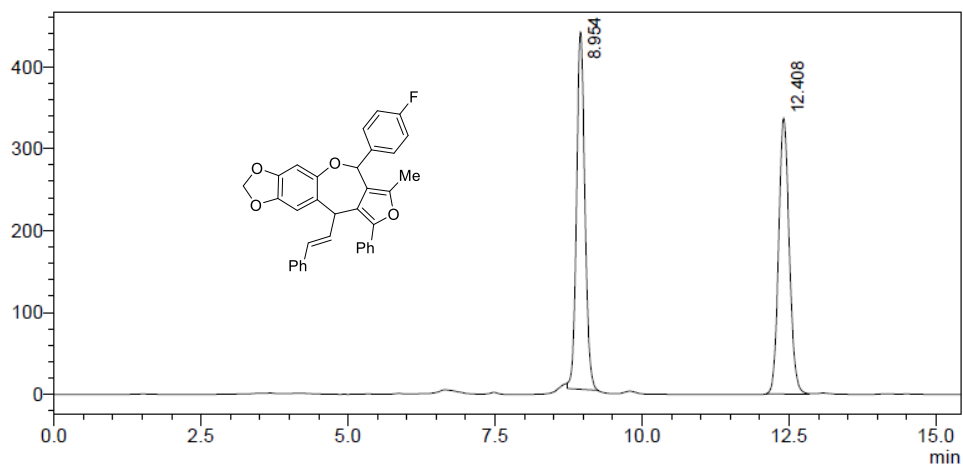

<Peak Table>

| Peak# | Ret. Time | Area    | Height | Area%   |
|-------|-----------|---------|--------|---------|
| 1     | 8.954     | 4297472 | 436192 | 50.351  |
| 2     | 12.408    | 4237629 | 336693 | 49.649  |
|       |           | 8535100 | 772884 | 100.000 |

<Chromatogram>

mV

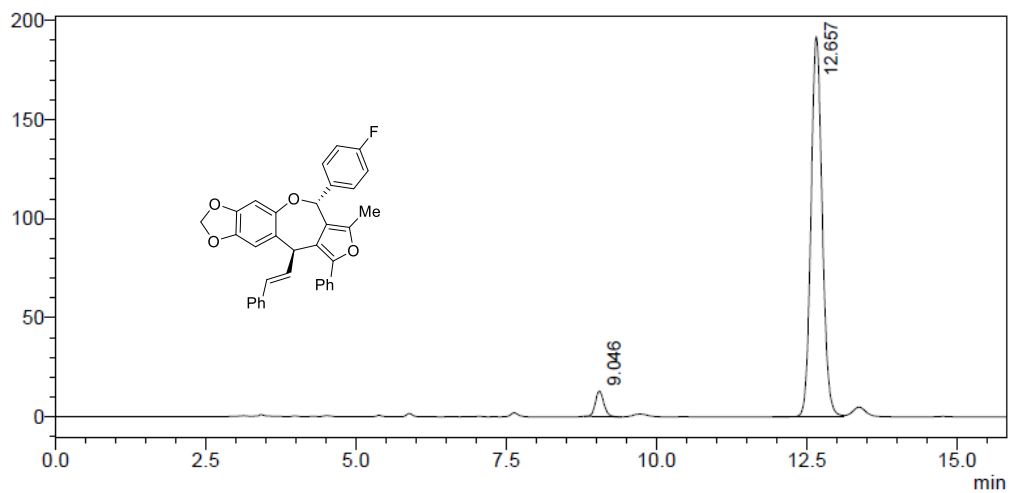

<Peak Table>

| Peak# | Ret. Time | Area    | Height | Area%   |
|-------|-----------|---------|--------|---------|
| 1     | 9.046     | 126755  | 12864  | 4.837   |
| 2     | 12.657    | 2493921 | 191907 | 95.163  |
|       |           | 2620676 | 204771 | 100.000 |

<Chromatogram>

mV

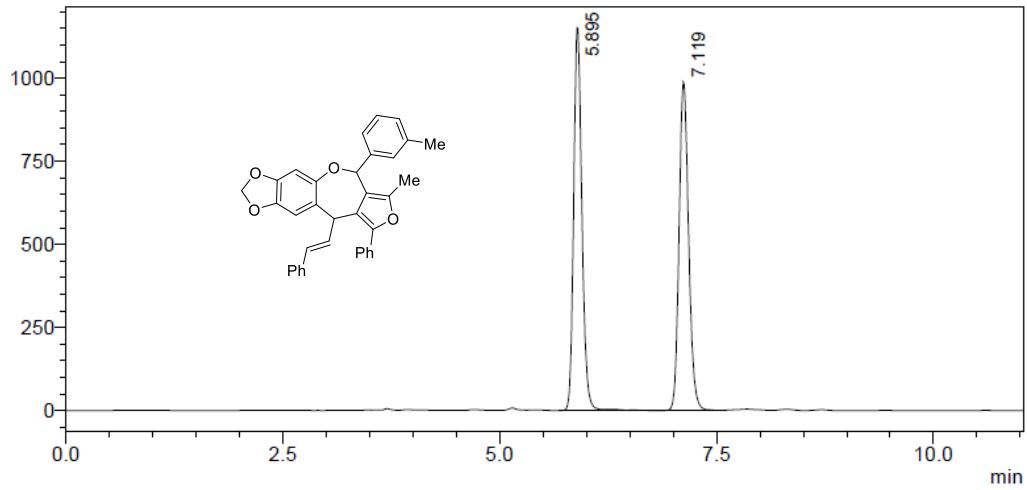

<Peak Table>

| Peak# | Ret. Time | Area     | Height  | Area%   |
|-------|-----------|----------|---------|---------|
| 1     | 5.895     | 7673184  | 1152681 | 50.256  |
| 2     | 7.119     | 7594885  | 989179  | 49.744  |
|       |           | 15268069 | 2141860 | 100.000 |

<Chromatogram>

mV

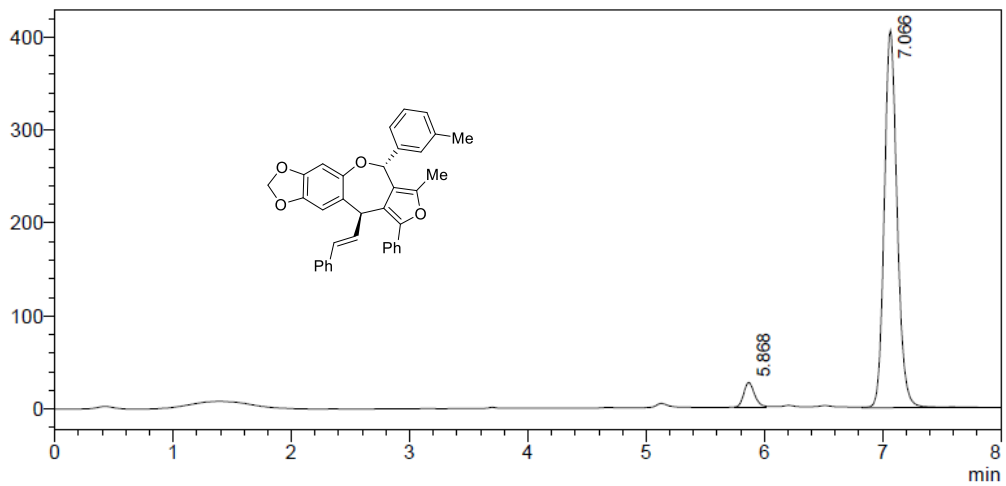

<Peak Table>

| Peak# | Ret. Time | Area    | Height | Area%   |
|-------|-----------|---------|--------|---------|
| 1     | 5.868     | 168163  | 26557  | 5.178   |
| 2     | 7.066     | 3079231 | 406006 | 94.822  |
|       |           | 3247395 | 432563 | 100.000 |

<Chromatogram>

mV

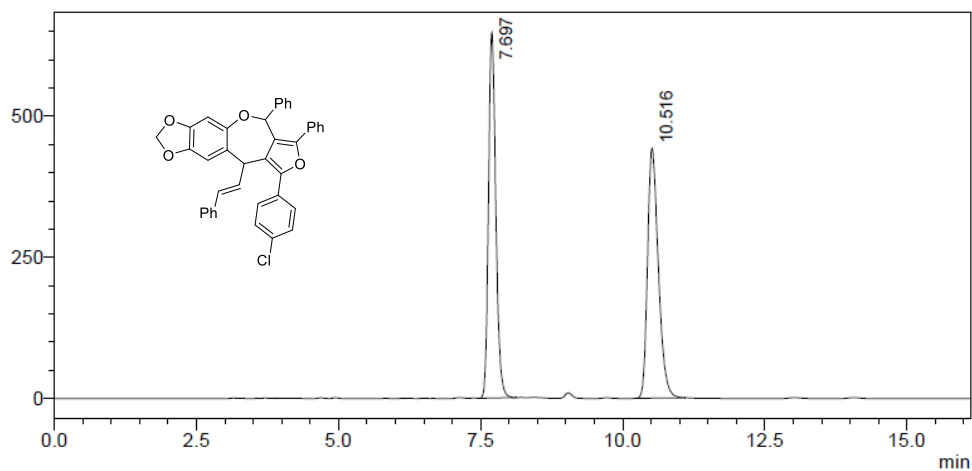

<Peak Table>

| Peak# | Ret. Time | Area     | Height  | Area%   |
|-------|-----------|----------|---------|---------|
| 1     | 7.697     | 5807686  | 647932  | 49.804  |
| 2     | 10.516    | 5853407  | 442401  | 50.196  |
|       |           | 11661093 | 1090333 | 100.000 |

<Chromatogram>

mV

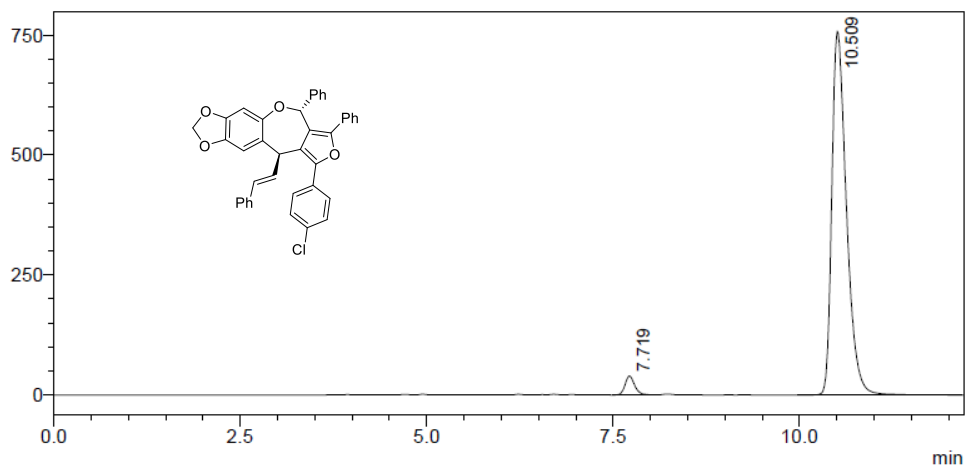

<Peak Table>

| Peak# | Ret. Time | Area     | Height | Area%   |
|-------|-----------|----------|--------|---------|
| 1     | 7.719     | 359841   | 39581  | 3.361   |
| 2     | 10.509    | 10345071 | 757251 | 96.639  |
|       |           | 10704912 | 796831 | 100.000 |

<Chromatogram>

mV

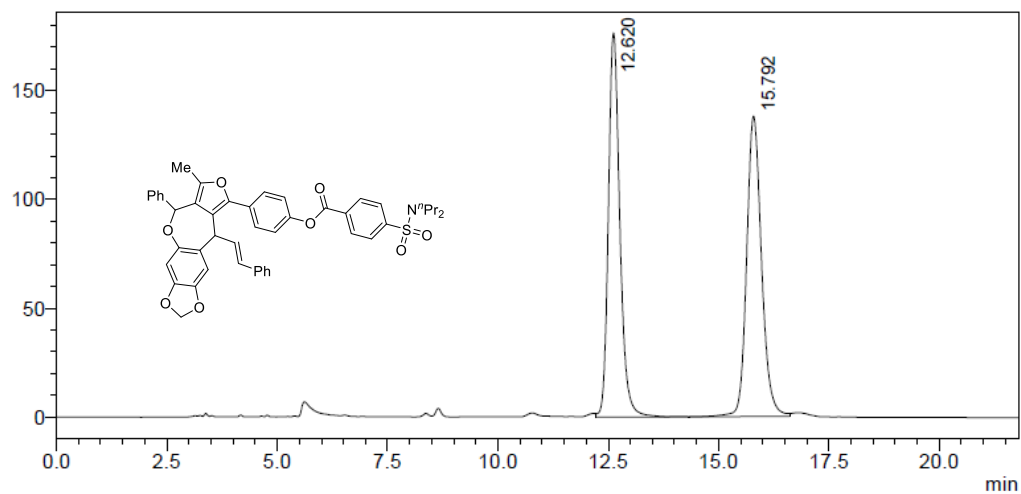

<Peak Table>

| Peak# | Ret. Time | Area    | Height | Area%   |
|-------|-----------|---------|--------|---------|
| 1     | 12.620    | 3190608 | 176417 | 49.622  |
| 2     | 15.792    | 3239240 | 137989 | 50.378  |
|       |           | 6429848 | 314406 | 100.000 |

<Chromatogram>

mV

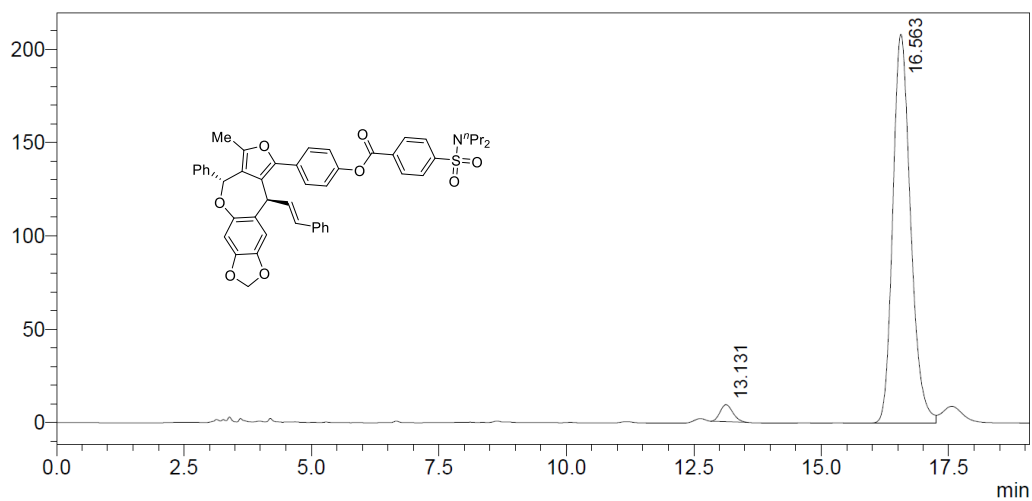

<Peak Table>

| Peak# | Ret. Time | Area    | Height | Area%   |
|-------|-----------|---------|--------|---------|
| 1     | 13.131    | 157324  | 9073   | 3.011   |
| 2     | 16.563    | 5067027 | 208257 | 96.989  |
|       |           | 5224351 | 217330 | 100.000 |



<Chromatogram>

mV

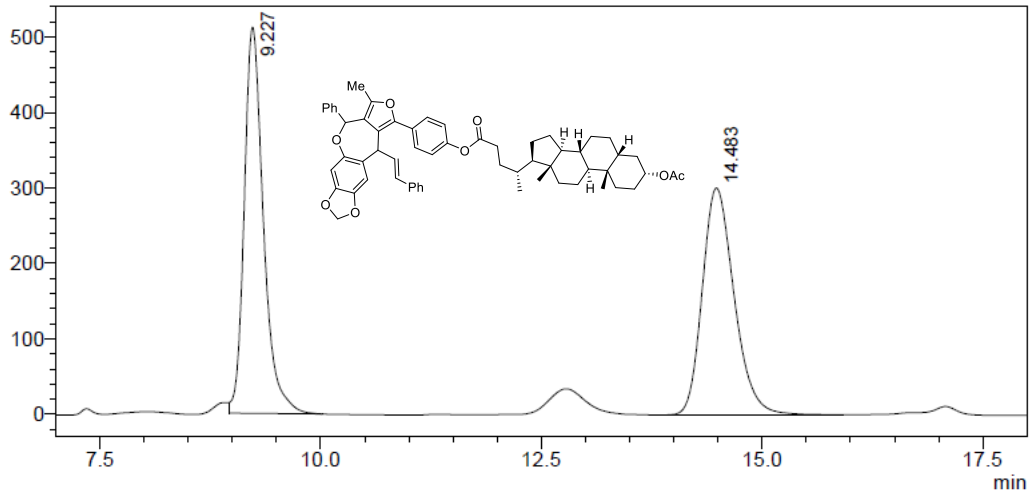

<Peak Table>

| Peak# | Ret. Time | Area     | Height | Area%   |
|-------|-----------|----------|--------|---------|
| 1     | 9.227     | 7745806  | 511640 | 50.412  |
| 2     | 14.483    | 7619052  | 301200 | 49.588  |
|       |           | 15364857 | 812840 | 100.000 |

<Chromatogram>

mV

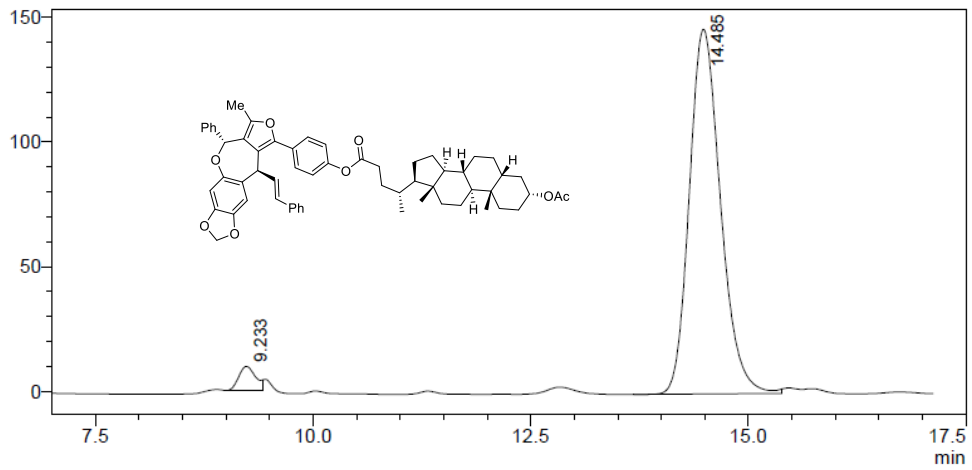

<Peak Table>

| Peak# | Ret. Time | Area    | Height | Area%   |
|-------|-----------|---------|--------|---------|
| 1     | 9.233     | 129080  | 9606   | 3.418   |
| 2     | 14.485    | 3646942 | 146239 | 96.582  |
|       |           | 3776022 | 155845 | 100.000 |

<Chromatogram>

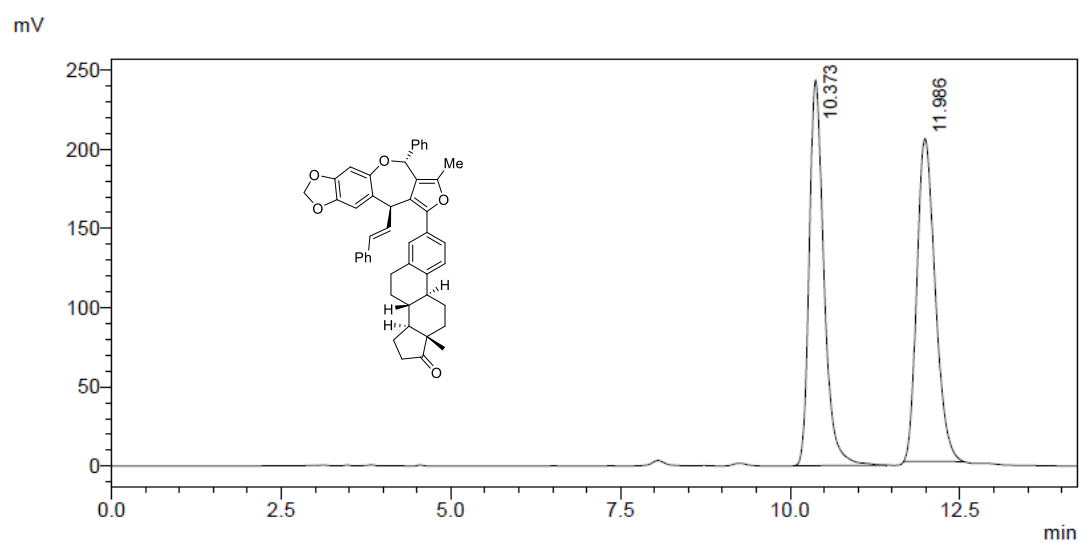

<Peak Table>

| Peak# | Ret. Time | Area    | Height | Area%   |
|-------|-----------|---------|--------|---------|
| 1     | 10.373    | 3679889 | 243453 | 49.009  |
| 2     | 11.986    | 3828677 | 203839 | 50.991  |
|       |           | 7508566 | 447293 | 100.000 |

<Chromatogram>

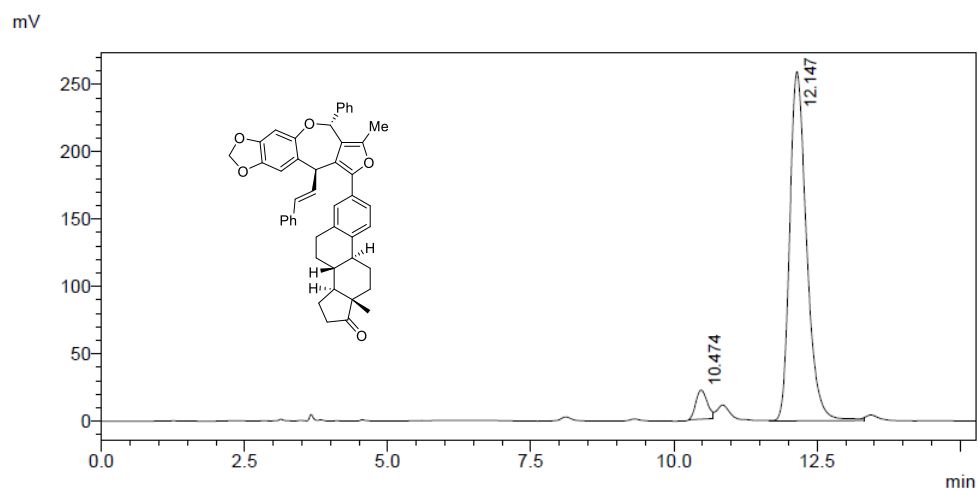

<Peak Table>

| Peak# | Ret. Time | Area    | Height | Area%   |
|-------|-----------|---------|--------|---------|
| 1     | 10.474    | 300354  | 21678  | 5.341   |
| 2     | 12.147    | 5322739 | 259329 | 94.659  |
|       |           | 5623093 | 281007 | 100.000 |

<Chromatogram>

mV

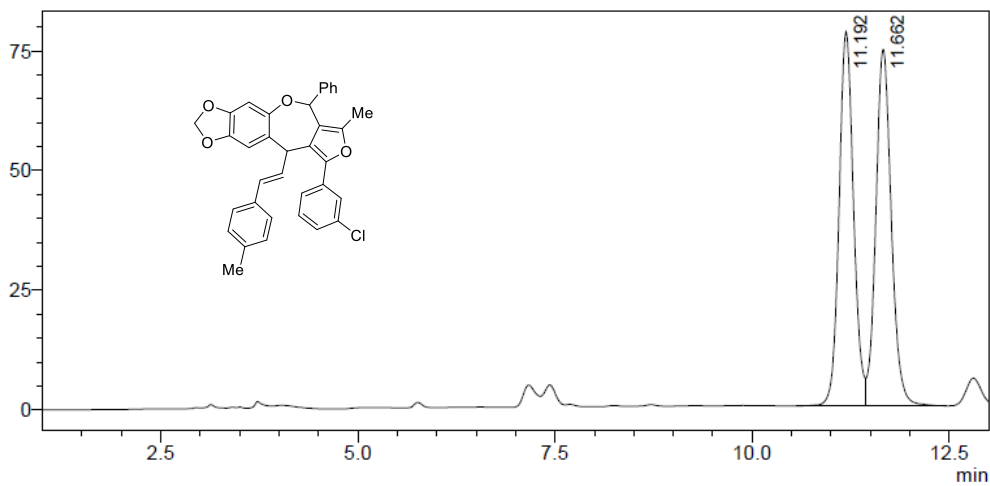

<Peak Table>

| Peak# | Ret. Time | Area    | Height | Area%   |
|-------|-----------|---------|--------|---------|
| 1     | 11.192    | 1002644 | 78194  | 49.587  |
| 2     | 11.662    | 1019340 | 74417  | 50.413  |
|       |           | 2021983 | 152611 | 100.000 |

<Chromatogram>

mV

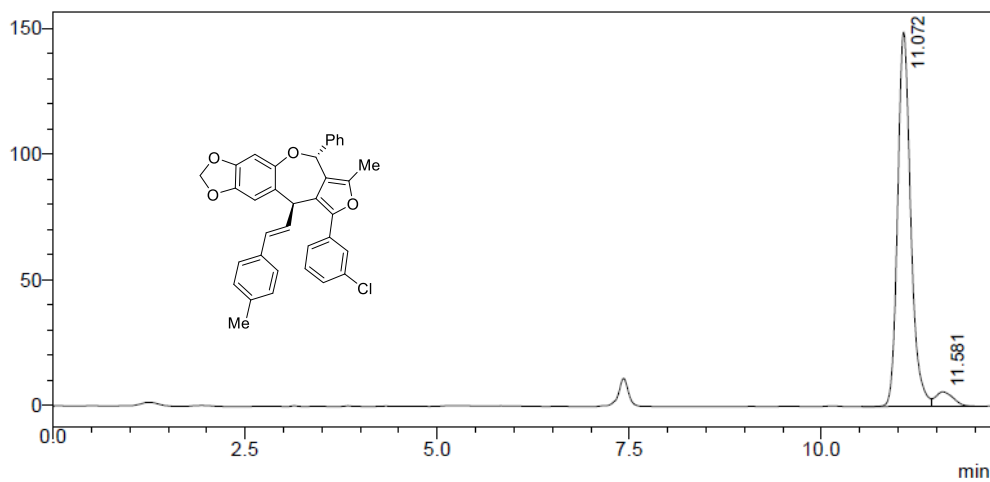

<Peak Table>

| Peak# | Ret. Time | Area    | Height | Area%   |
|-------|-----------|---------|--------|---------|
| 1     | 11.072    | 1768074 | 148813 | 94.993  |
| 2     | 11.581    | 93201   | 5721   | 5.007   |
|       |           | 1861276 | 154534 | 100.000 |

<Chromatogram>

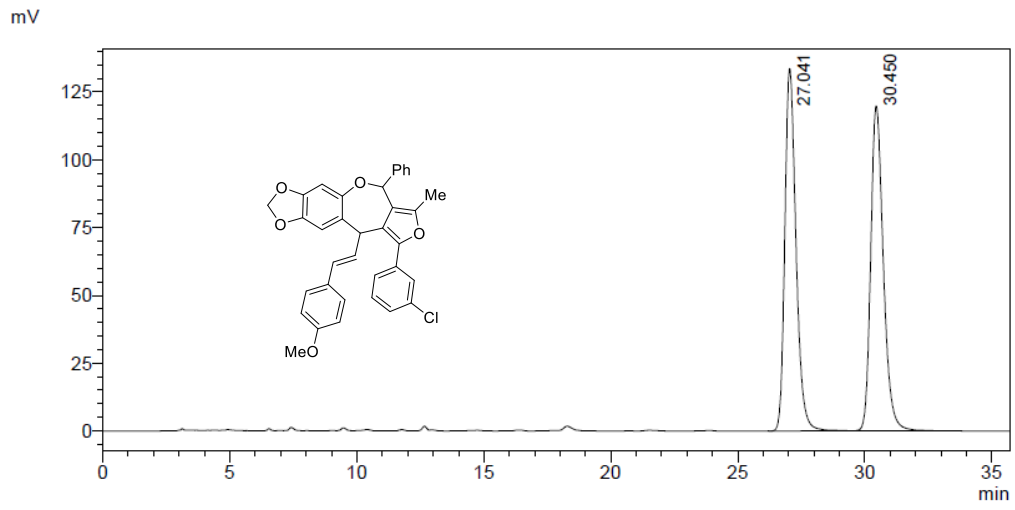

<Peak Table>

| Peak# | Ret. Time | Area    | Height | Area%   |
|-------|-----------|---------|--------|---------|
| 1     | 27.041    | 4093125 | 133628 | 49.738  |
| 2     | 30.450    | 4136171 | 119816 | 50.262  |
|       |           | 8229296 | 253444 | 100.000 |

<Chromatogram>

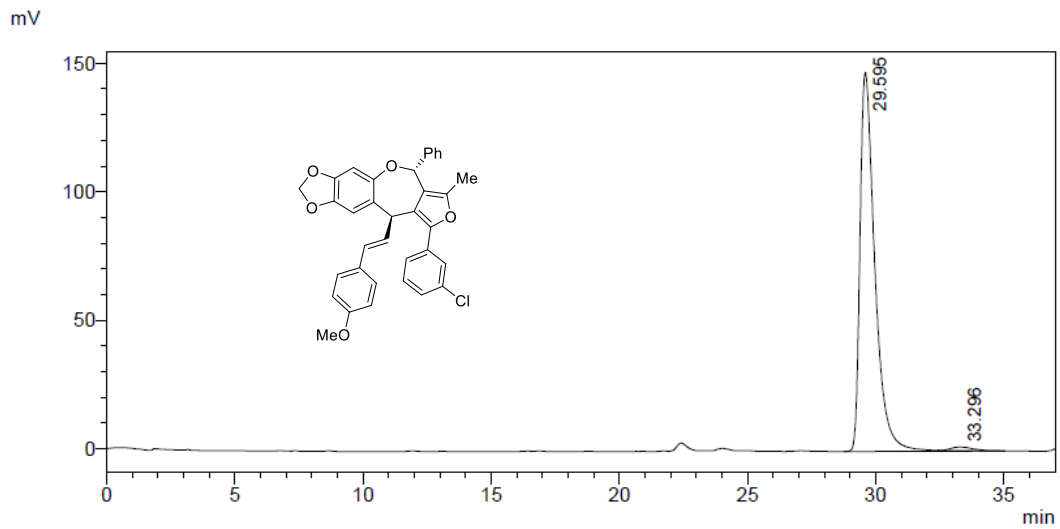

<Peak Table>

| Peak# | Ret. Time | Area    | Height | Area%   |
|-------|-----------|---------|--------|---------|
| 1     | 29.595    | 5952019 | 147558 | 98.636  |
| 2     | 33.296    | 82281   | 1407   | 1.364   |
|       |           | 6034300 | 148965 | 100.000 |

<Chromatogram>

mV

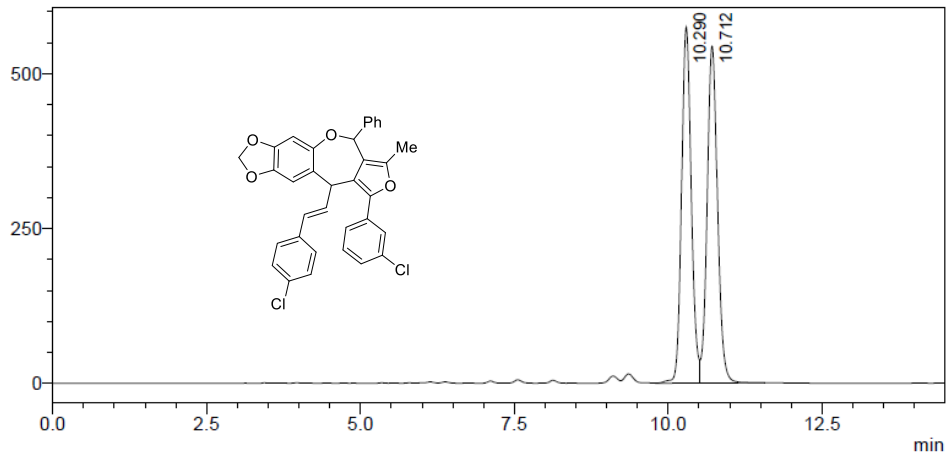

<Peak Table>

| Peak# | Ret. Time | Area     | Height  | Area%   |
|-------|-----------|----------|---------|---------|
| 1     | 10.290    | 6344073  | 575274  | 49.852  |
| 2     | 10.712    | 6381667  | 543896  | 50.148  |
|       |           | 12725741 | 1119170 | 100.000 |

<Chromatogram>

mV

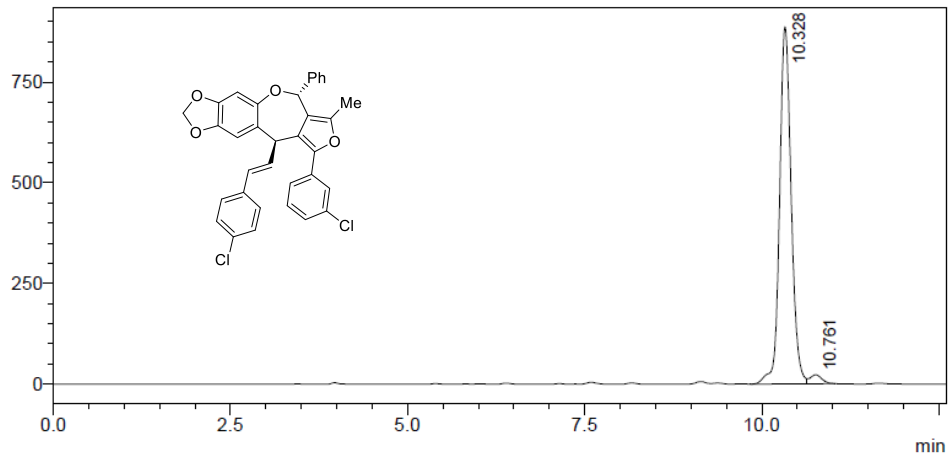

<Peak Table>

| Peak# | Ret. Time | Area     | Height | Area%   |
|-------|-----------|----------|--------|---------|
| 1     | 10.328    | 10107223 | 886014 | 97.532  |
| 2     | 10.761    | 255745   | 22145  | 2.468   |
|       |           | 10362968 | 908159 | 100.000 |

<Chromatogram>

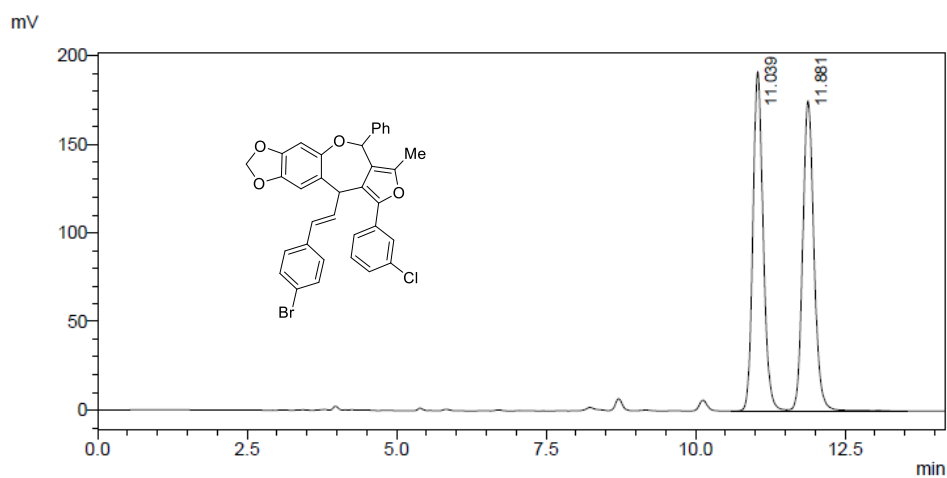

<Peak Table>

| Peak# | Ret. Time | Area    | Height | Area%   |
|-------|-----------|---------|--------|---------|
| 1     | 11.039    | 2298082 | 191317 | 50.011  |
| 2     | 11.881    | 2297100 | 174865 | 49.989  |
|       |           | 4595182 | 366182 | 100.000 |

<Chromatogram>

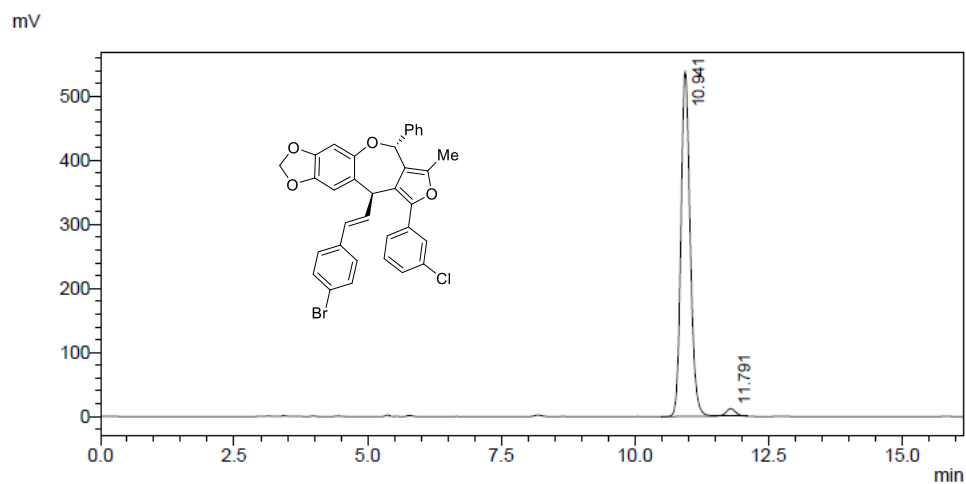

<Peak Table>

| Peak# | Ret. Time | Area    | Height | Area%   |
|-------|-----------|---------|--------|---------|
| 1     | 10.941    | 6484030 | 538540 | 97.677  |
| 2     | 11.791    | 154194  | 11935  | 2.323   |
|       |           | 6638224 | 550476 | 100.000 |

<Chromatogram>

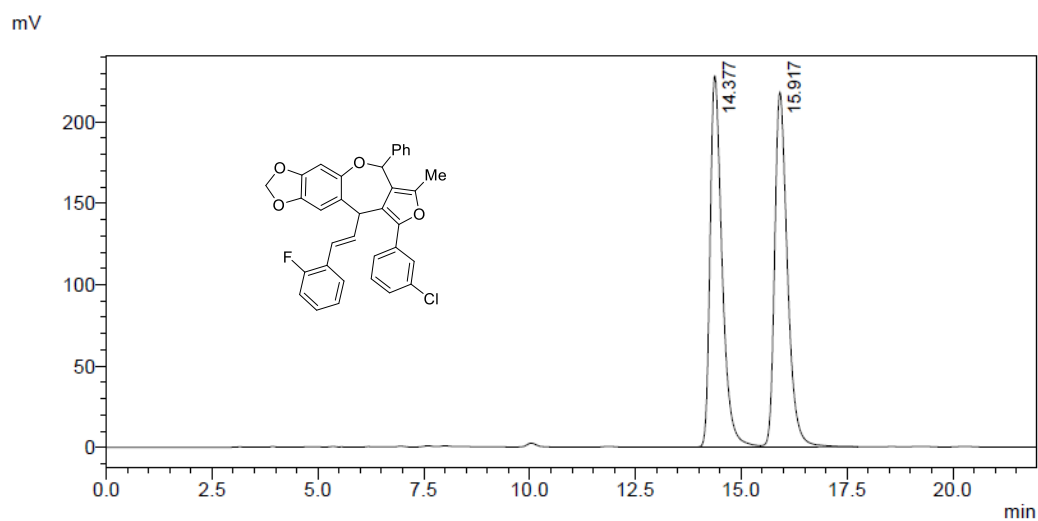

<Peak Table>

| Peak# | Ret. Time | Area    | Height | Area%   |
|-------|-----------|---------|--------|---------|
| 1     | 14.377    | 4498470 | 227988 | 49.605  |
| 2     | 15.917    | 4570197 | 217773 | 50.395  |
|       |           | 9068667 | 445761 | 100.000 |

<Chromatogram>

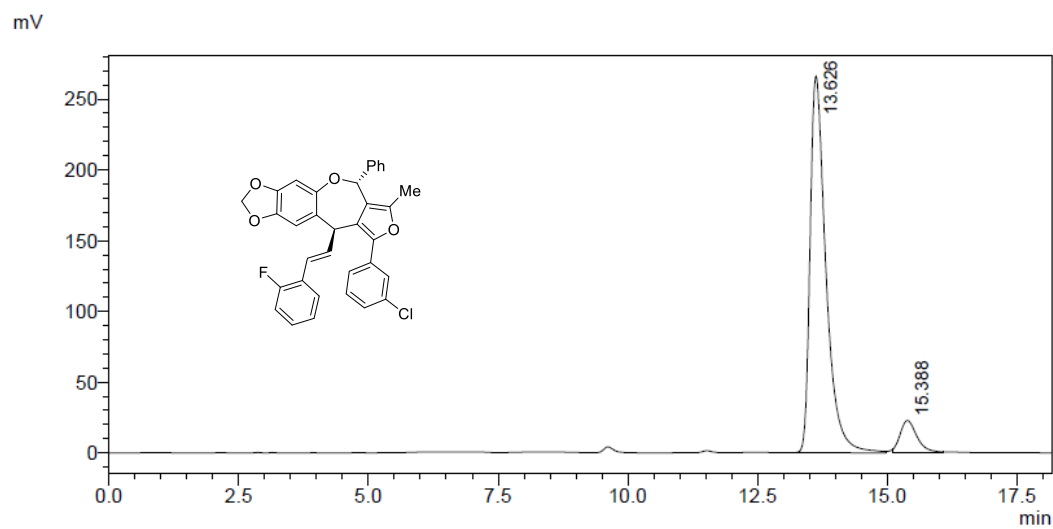

<Peak Table>

| Peak# | Ret. Time | Area    | Height | Area%   |
|-------|-----------|---------|--------|---------|
| 1     | 13.626    | 5663714 | 266222 | 91.845  |
| 2     | 15.388    | 502900  | 22500  | 8.155   |
|       |           | 6166614 | 288722 | 100.000 |

<Chromatogram>

mV

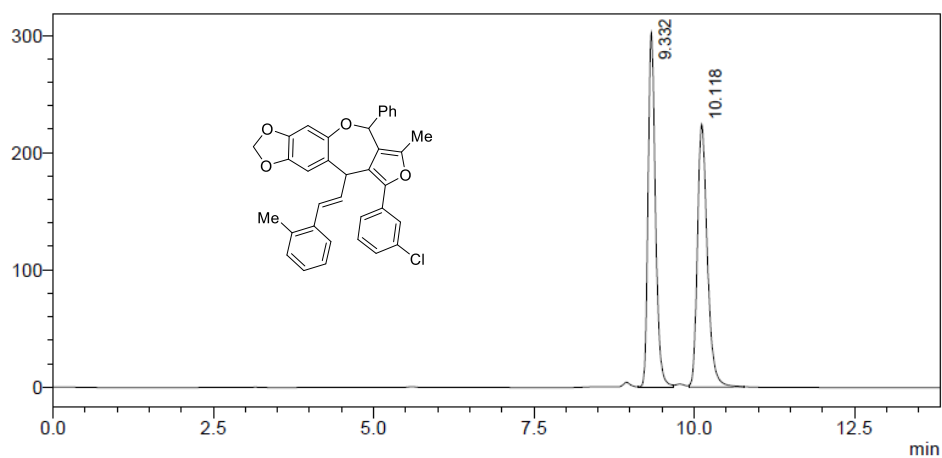

<Peak Table>

| Peak# | Ret. Time | Area    | Height | Area%   |
|-------|-----------|---------|--------|---------|
| 1     | 9.332     | 2424854 | 301645 | 50.037  |
| 2     | 10.118    | 2421226 | 224047 | 49.963  |
|       |           | 4846080 | 525692 | 100.000 |

<Chromatogram>

mV

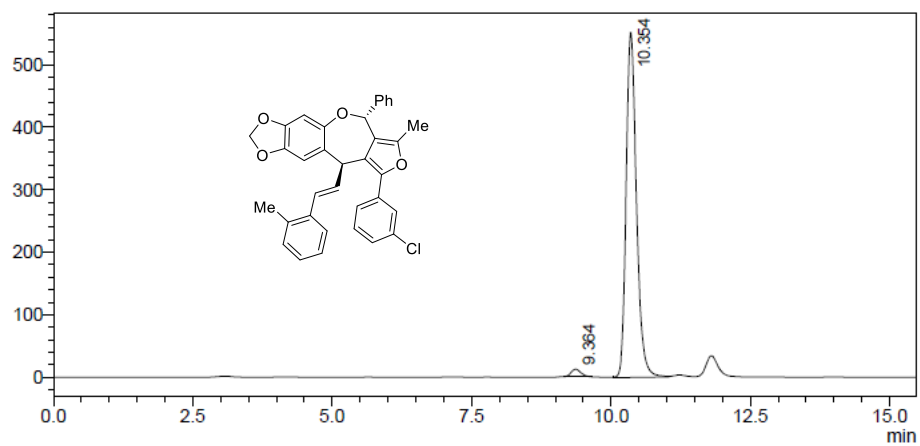

<Peak Table>

| Peak# | Ret. Time | Area    | Height | Area%   |
|-------|-----------|---------|--------|---------|
| 1     | 9.364     | 157962  | 12416  | 2.171   |
| 2     | 10.354    | 7116714 | 551896 | 97.829  |
|       |           | 7274676 | 564312 | 100.000 |



<Chromatogram>

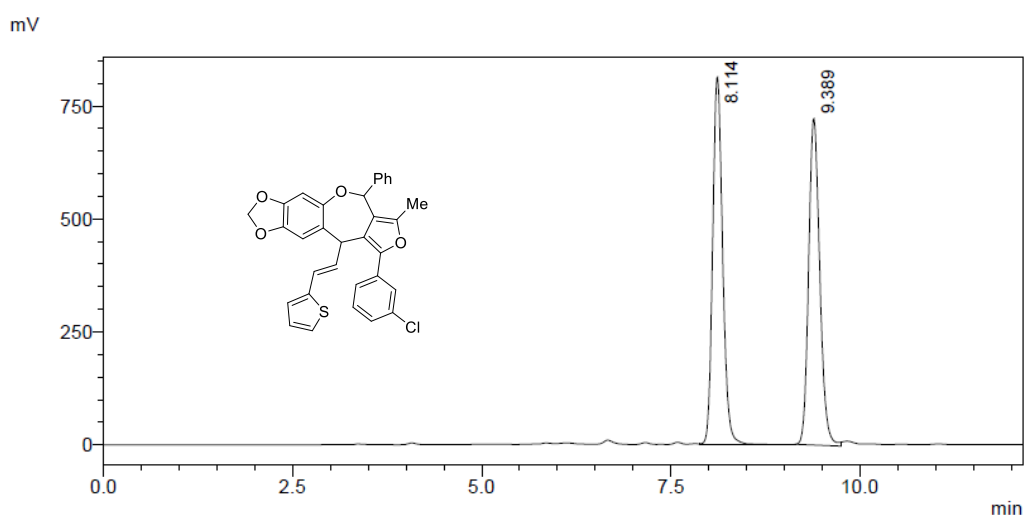

<Peak Table>

| Peak# | Ret. Time | Area     | Height  | Area%   |
|-------|-----------|----------|---------|---------|
| 1     | 8.114     | 7500932  | 814279  | 50.302  |
| 2     | 9.389     | 7410860  | 722892  | 49.698  |
|       |           | 14911792 | 1537171 | 100.000 |

<Chromatogram>

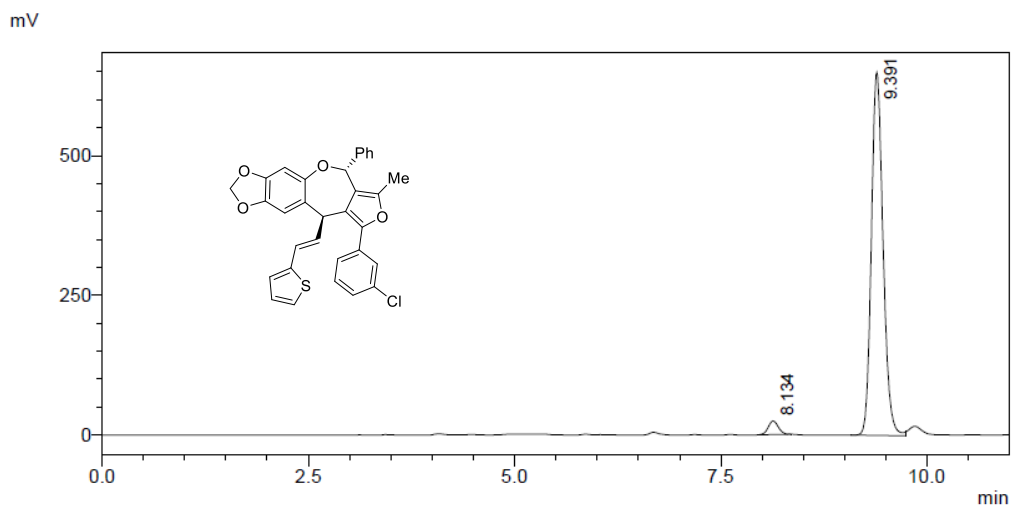

<Peak Table>

| Peak# | Ret. Time | Area    | Height | Area%   |
|-------|-----------|---------|--------|---------|
| 1     | 8.134     | 206913  | 24257  | 3.127   |
| 2     | 9.391     | 6410983 | 650066 | 96.873  |
|       |           | 6617896 | 674323 | 100.000 |

<Chromatogram>

mV

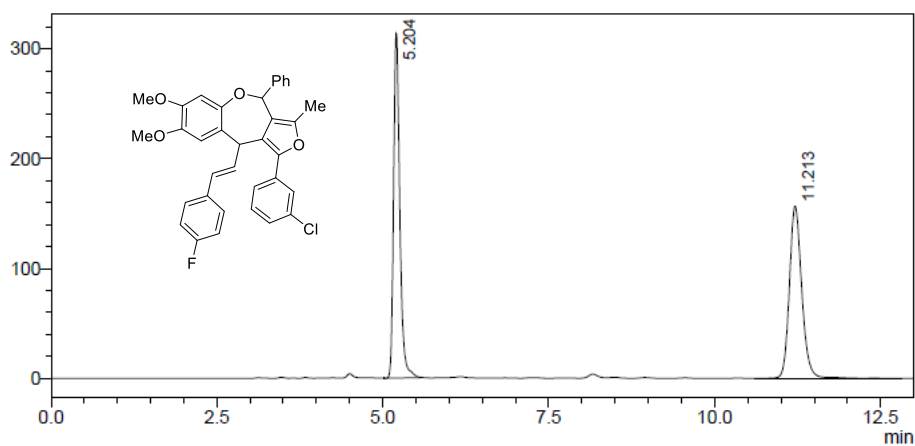

<Peak Table>

| Peak# | Ret. Time | Area    | Height | Area%   |
|-------|-----------|---------|--------|---------|
| 1     | 5.204     | 2035729 | 313837 | 50.009  |
| 2     | 11.213    | 2035016 | 156657 | 49.991  |
|       |           | 4070745 | 470494 | 100.000 |

<Chromatogram>

mV

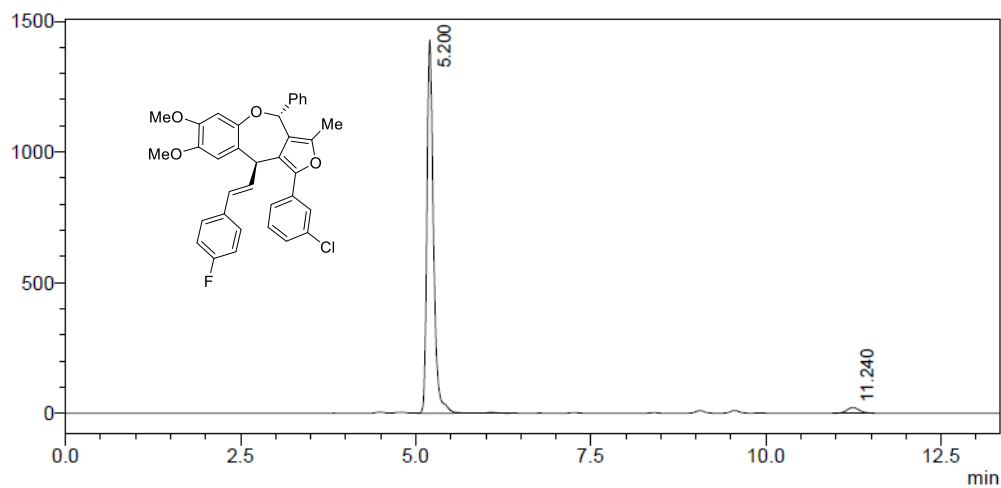

<Peak Table>

| Peak# | Ret. Time | Area    | Height  | Area%   |
|-------|-----------|---------|---------|---------|
| 1     | 5.200     | 9350259 | 1430159 | 97.157  |
| 2     | 11.240    | 273577  | 21687   | 2.843   |
|       |           | 9623836 | 1451846 | 100.000 |

<Chromatogram>

mV

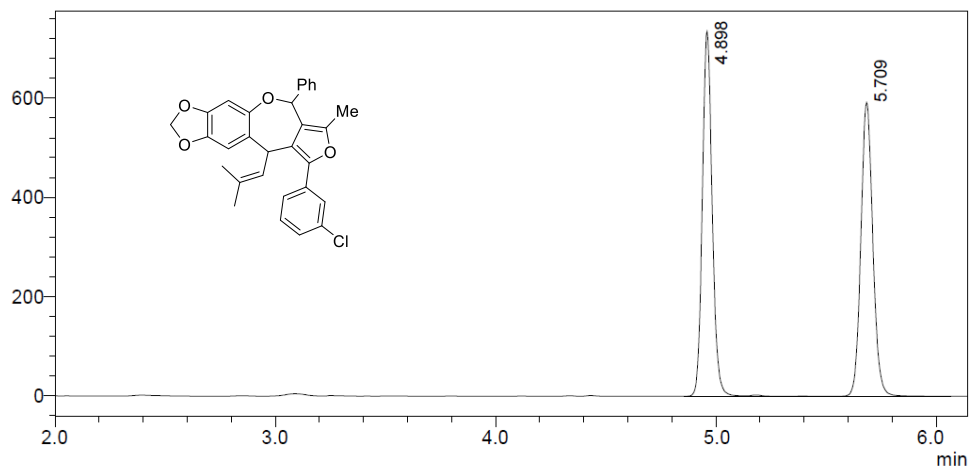

<Peak Table>

| Peak# | Ret. Time | Area     | Height  | Area%   |
|-------|-----------|----------|---------|---------|
| 1     | 4.898     | 5738858  | 735416  | 50.640  |
| 2     | 5.709     | 5593799  | 592266  | 49.360  |
|       |           | 11332657 | 1327682 | 100.000 |

mV

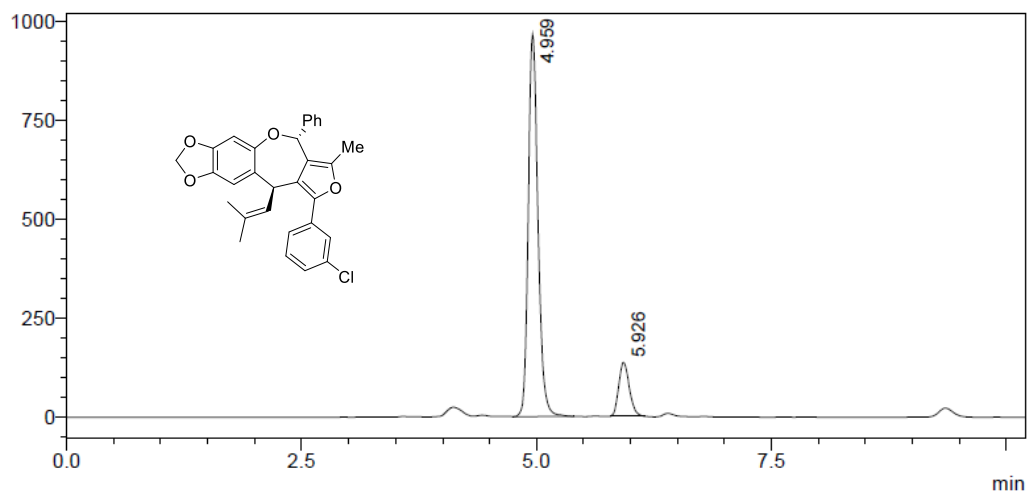

<Peak Table>

| Peak# | Ret. Time | Area    | Height  | Area%   |
|-------|-----------|---------|---------|---------|
| 1     | 4.959     | 6915750 | 964277  | 86.687  |
| 2     | 5.926     | 1062069 | 135755  | 13.313  |
|       |           | 7977819 | 1100032 | 100.000 |

<Chromatogram>

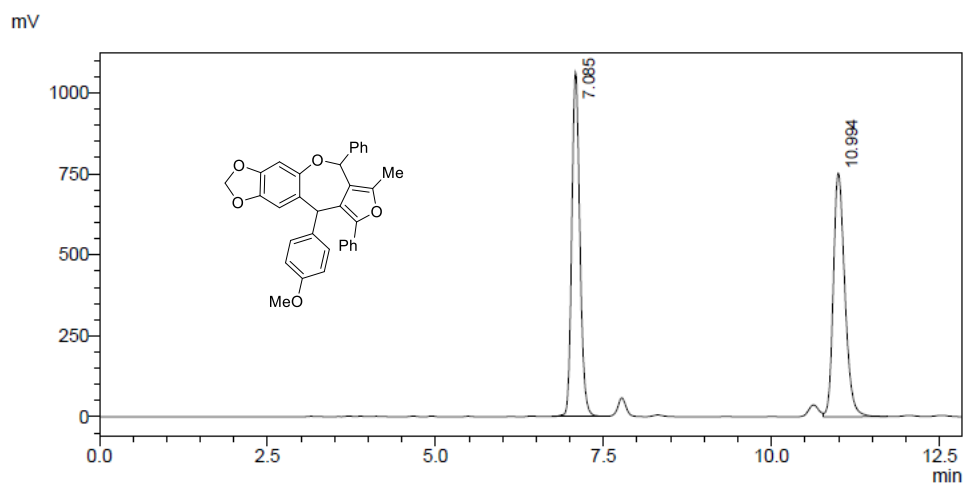

<Peak Table>

| Peak# | Ret. Time | Area     | Height  | Area%   |
|-------|-----------|----------|---------|---------|
| 1     | 7.085     | 8960371  | 1063437 | 50.003  |
| 2     | 10.994    | 8959404  | 751880  | 49.997  |
|       |           | 17919775 | 1815316 | 100.000 |

<Chromatogram>

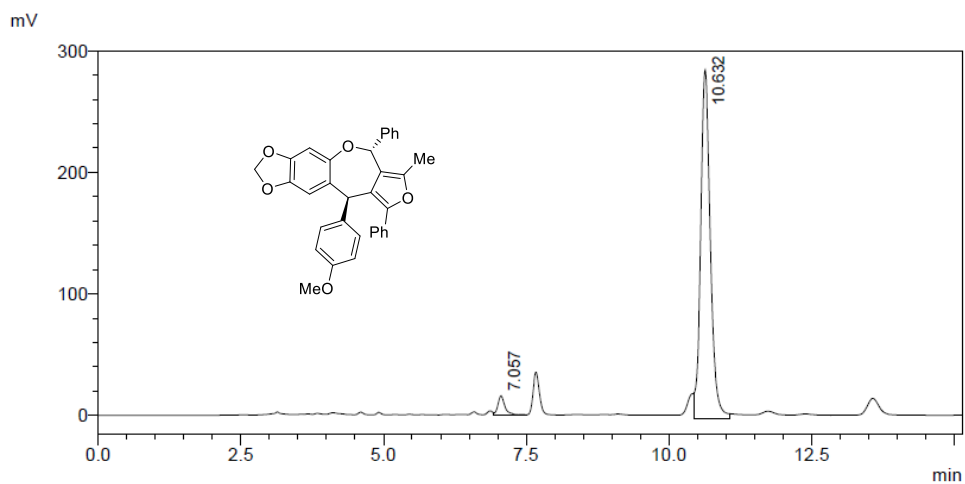

<Peak Table>

| Peak# | Ret. Time | Area    | Height | Area%   |
|-------|-----------|---------|--------|---------|
| 1     | 7.057     | 136908  | 15823  | 3.918   |
| 2     | 10.632    | 3357097 | 286611 | 96.082  |
|       |           | 3494005 | 302434 | 100.000 |

<Chromatogram>

mV

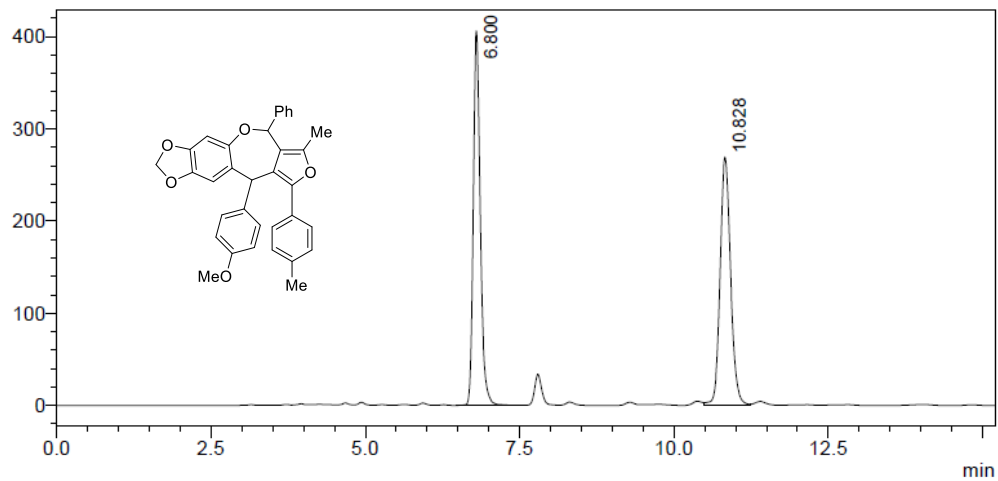

<Peak Table>

| Peak# | Ret. Time | Area    | Height | Area%   |
|-------|-----------|---------|--------|---------|
| 1     | 6.800     | 3209234 | 406483 | 50.112  |
| 2     | 10.828    | 3194871 | 268842 | 49.888  |
|       |           | 6404105 | 675326 | 100.000 |

<Chromatogram>

mV

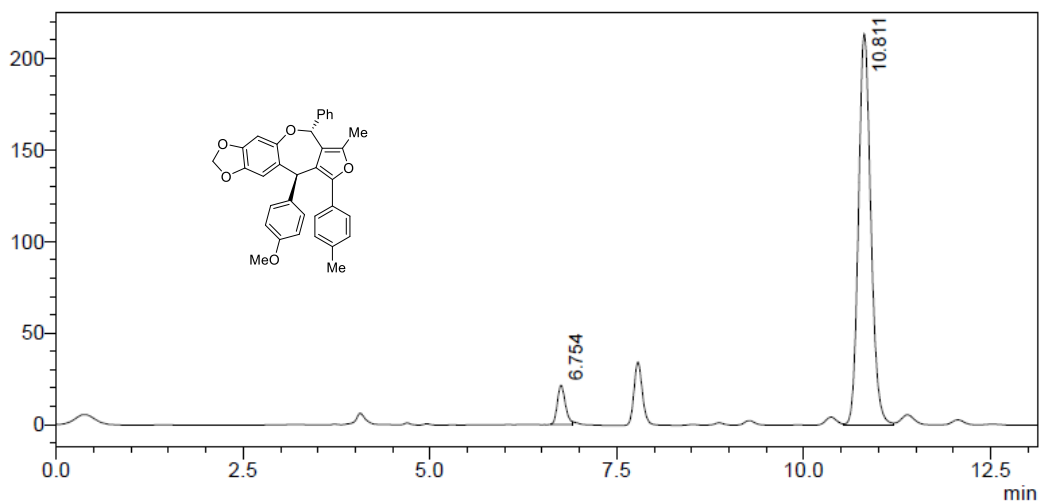

<Peak Table>

| Peak# | Ret. Time | Area    | Height | Area%   |
|-------|-----------|---------|--------|---------|
| 1     | 6.754     | 161207  | 21347  | 6.117   |
| 2     | 10.811    | 2474259 | 213784 | 93.883  |
|       |           | 2635466 | 235132 | 100.000 |

<Chromatogram>

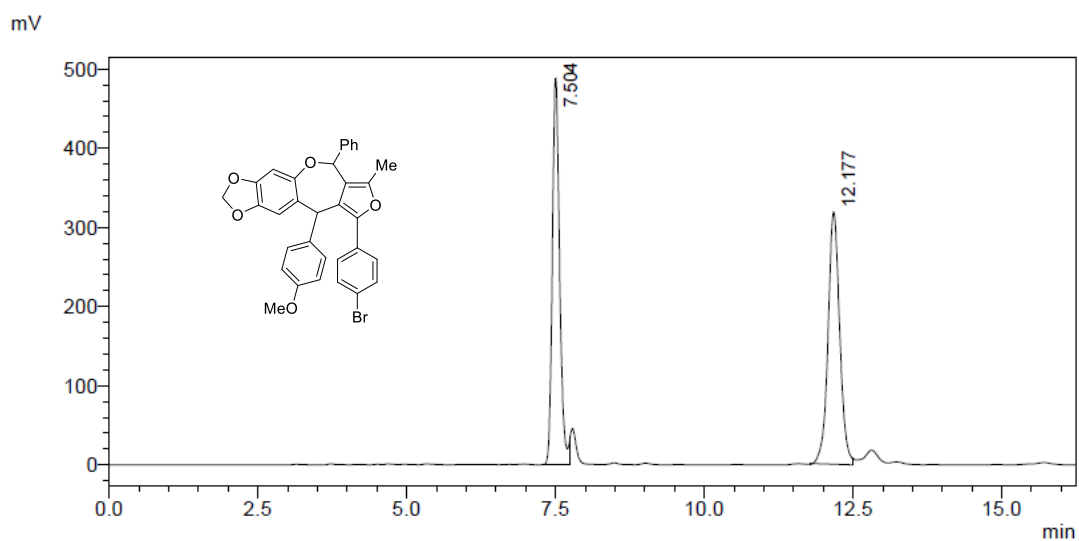

<Peak Table>

| Peak# | Ret. Time | Area    | Height | Area%   |
|-------|-----------|---------|--------|---------|
| 1     | 7.504     | 4181710 | 487632 | 49.138  |
| 2     | 12.177    | 4328444 | 318800 | 50.862  |
|       |           | 8510154 | 806432 | 100.000 |

<Chromatogram>

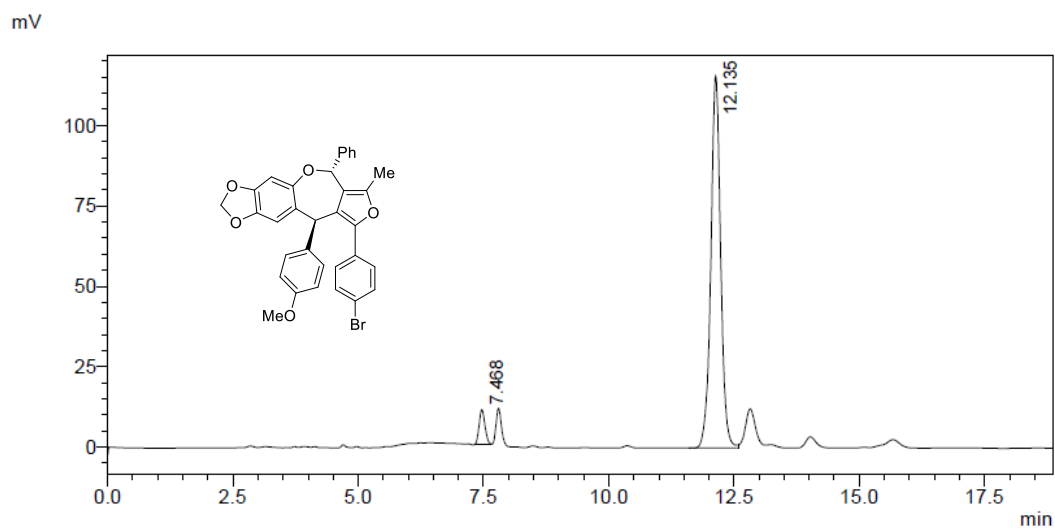

<Peak Table>

| Peak# | Ret. Time | Area    | Height | Area%   |
|-------|-----------|---------|--------|---------|
| 1     | 7.468     | 85880   | 10674  | 5.186   |
| 2     | 12.135    | 1570214 | 115617 | 94.814  |
|       |           | 1656094 | 126291 | 100.000 |

<Chromatogram>

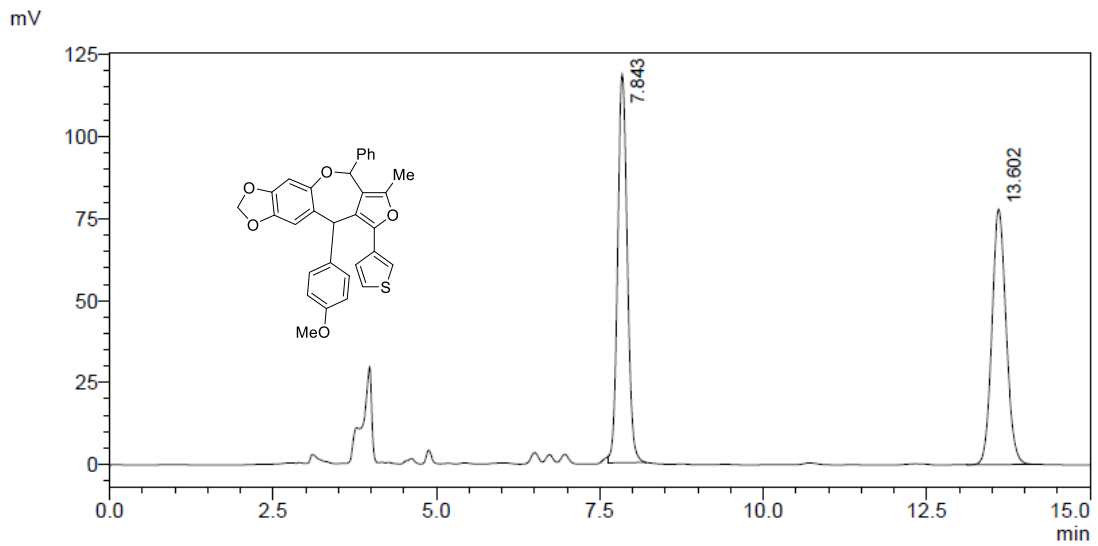

<Peak Table>

| Peak# | Ret. Time | Area    | Height | Area%   |
|-------|-----------|---------|--------|---------|
| 1     | 7.843     | 1214102 | 118426 | 50.818  |
| 2     | 13.602    | 1175009 | 77820  | 49.182  |
|       |           | 2389111 | 196246 | 100.000 |

<Chromatogram>

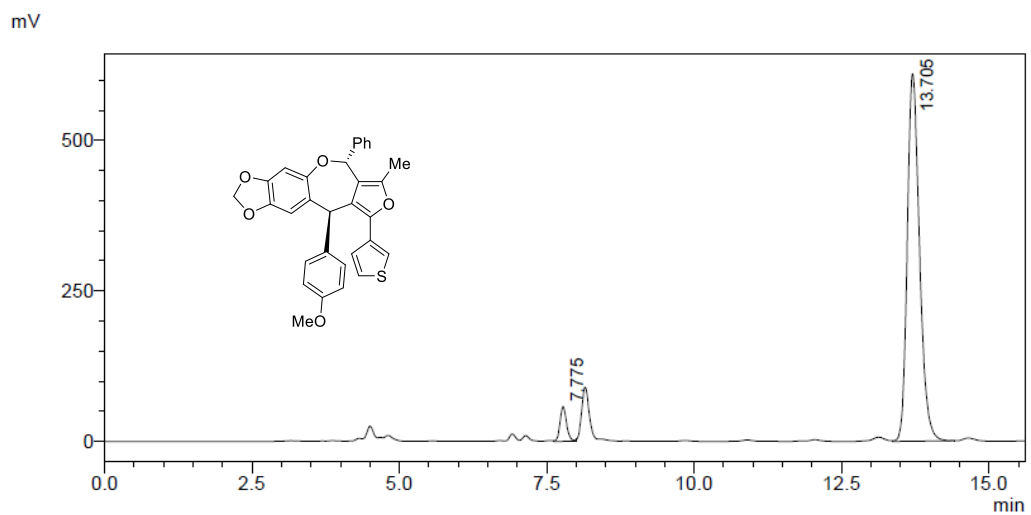

<Peak Table>

| Peak# | Ret. Time | Area    | Height | Area%   |
|-------|-----------|---------|--------|---------|
| 1     | 7.775     | 457358  | 57970  | 4.937   |
| 2     | 13.705    | 8806008 | 610216 | 95.063  |
|       |           | 9263366 | 668186 | 100.000 |

<Chromatogram>

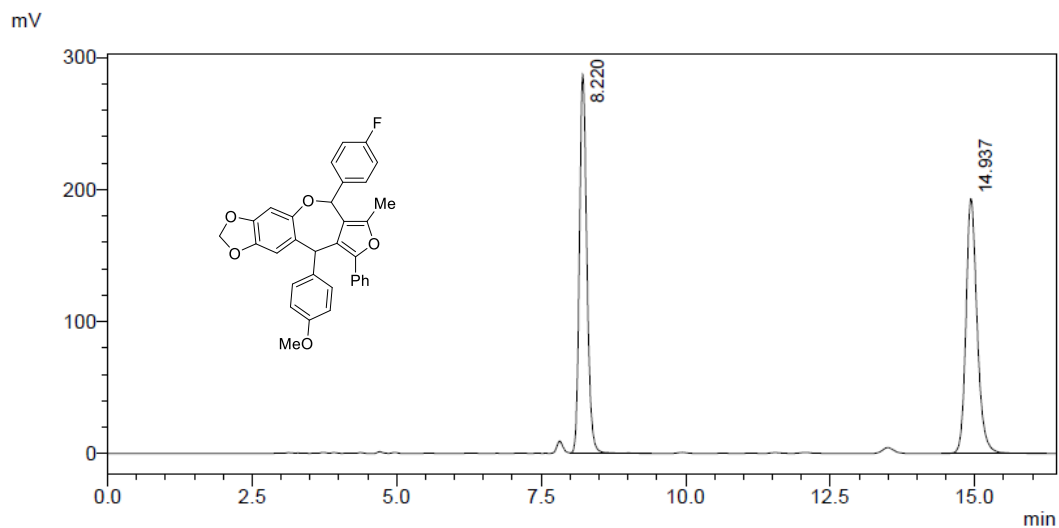

<Peak Table>

| Peak# | Ret. Time | Area    | Height | Area%   |
|-------|-----------|---------|--------|---------|
| 1     | 8.220     | 2593583 | 287004 | 50.005  |
| 2     | 14.937    | 2593077 | 193007 | 49.995  |
|       |           | 5186660 | 480011 | 100.000 |

<Chromatogram>

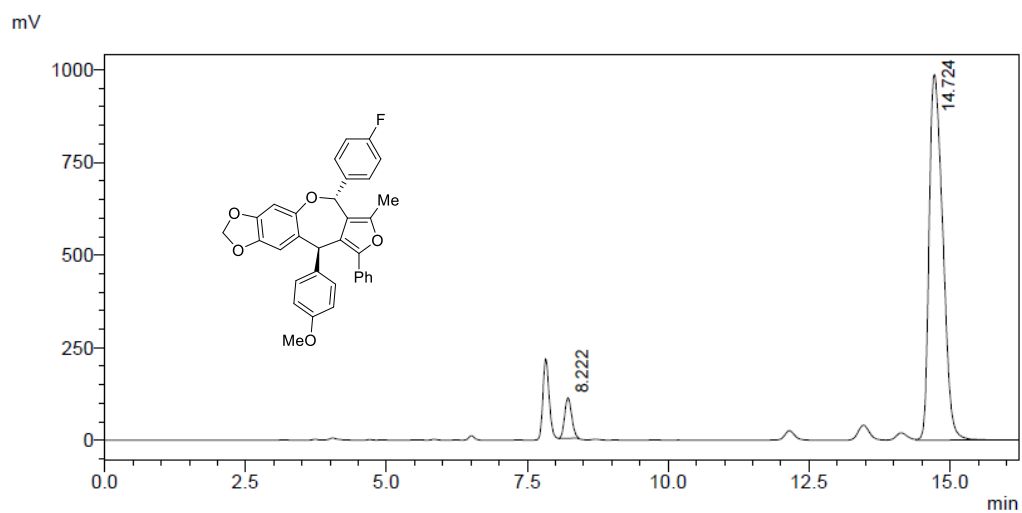

<Peak Table>

| Peak# | Ret. Time | Area     | Height  | Area%   |
|-------|-----------|----------|---------|---------|
| 1     | 8.222     | 944896   | 108917  | 5.384   |
| 2     | 14.724    | 16606203 | 986828  | 94.616  |
|       |           | 17551099 | 1095746 | 100.000 |



<Chromatogram>

mV

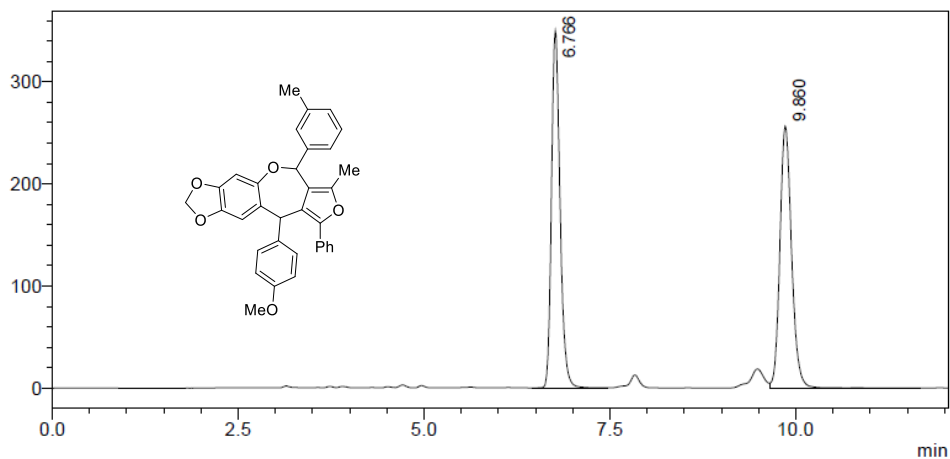

<Peak Table>

| Peak# | Ret. Time | Area    | Height | Area%   |
|-------|-----------|---------|--------|---------|
| 1     | 6.766     | 2810136 | 350134 | 50.029  |
| 2     | 9.860     | 2806910 | 256880 | 49.971  |
|       |           | 5617046 | 607014 | 100.000 |

<Chromatogram>

mV

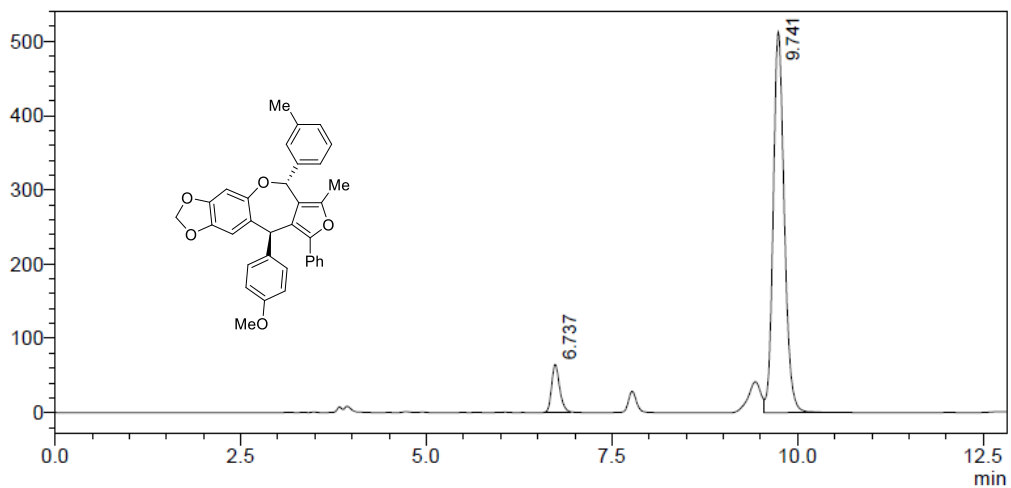

<Peak Table>

| Peak# | Ret. Time | Area    | Height | Area%   |
|-------|-----------|---------|--------|---------|
| 1     | 6.737     | 473164  | 63811  | 8.155   |
| 2     | 9.741     | 5329063 | 512672 | 91.845  |
|       |           | 5802227 | 576483 | 100.000 |

<Chromatogram>

mV

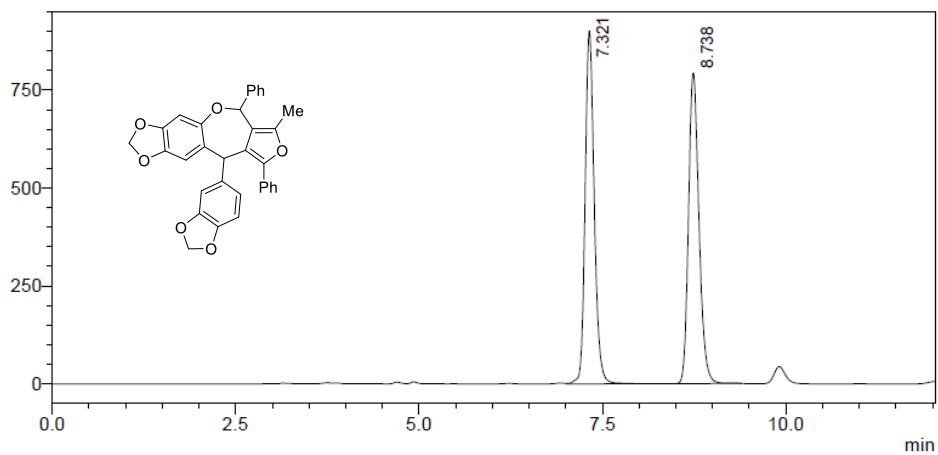

<Peak Table>

| Peak# | Ret. Time | Area     | Height  | Area%   |
|-------|-----------|----------|---------|---------|
| 1     | 7.321     | 7782211  | 901068  | 49.751  |
| 2     | 8.738     | 7860017  | 792268  | 50.249  |
|       |           | 15642227 | 1693336 | 100.000 |

<Chromatogram>

mV

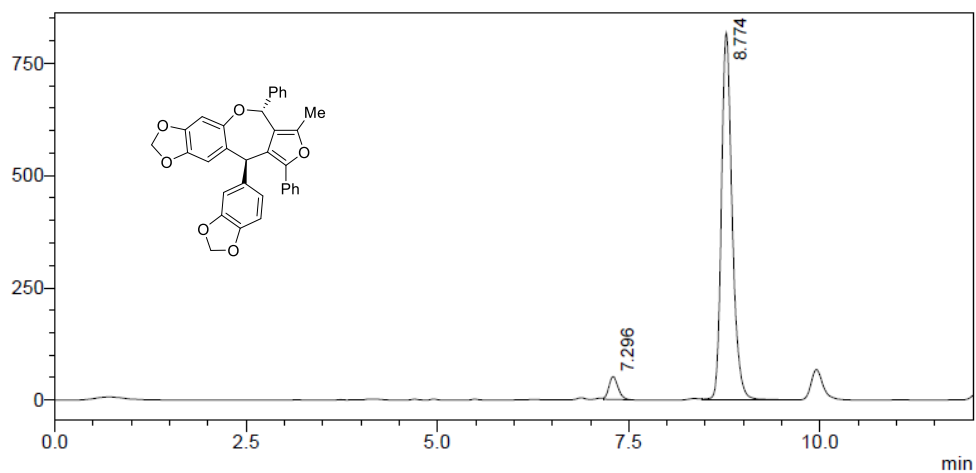

<Peak Table>

| Peak# | Ret. Time | Area    | Height | Area%   |
|-------|-----------|---------|--------|---------|
| 1     | 7.296     | 421775  | 50799  | 4.985   |
| 2     | 8.774     | 8039490 | 818112 | 95.015  |
|       |           | 8461265 | 868911 | 100.000 |

<Chromatogram>

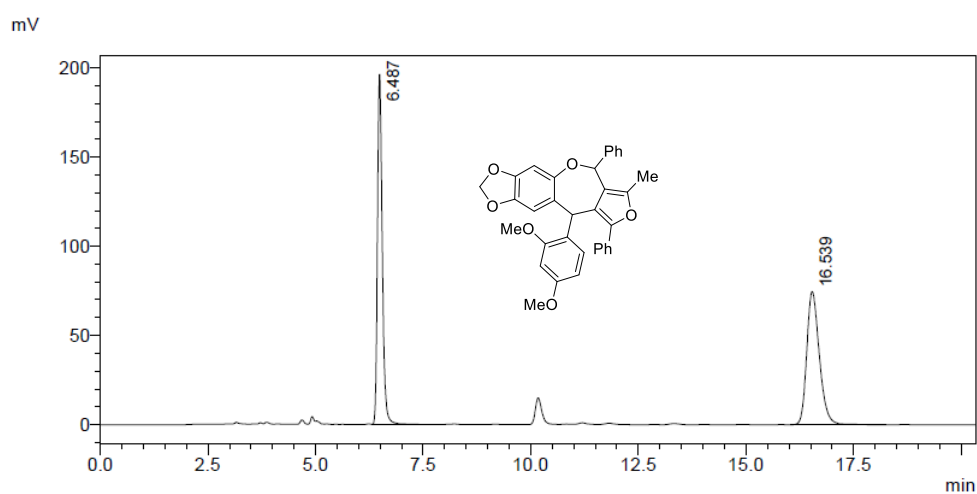

<Peak Table>

| Peak# | Ret. Time | Area    | Height | Area%   |
|-------|-----------|---------|--------|---------|
| 1     | 6.487     | 1538414 | 196070 | 50.291  |
| 2     | 16.539    | 1520608 | 74589  | 49.709  |
|       |           | 3059022 | 270659 | 100.000 |

<Chromatogram>

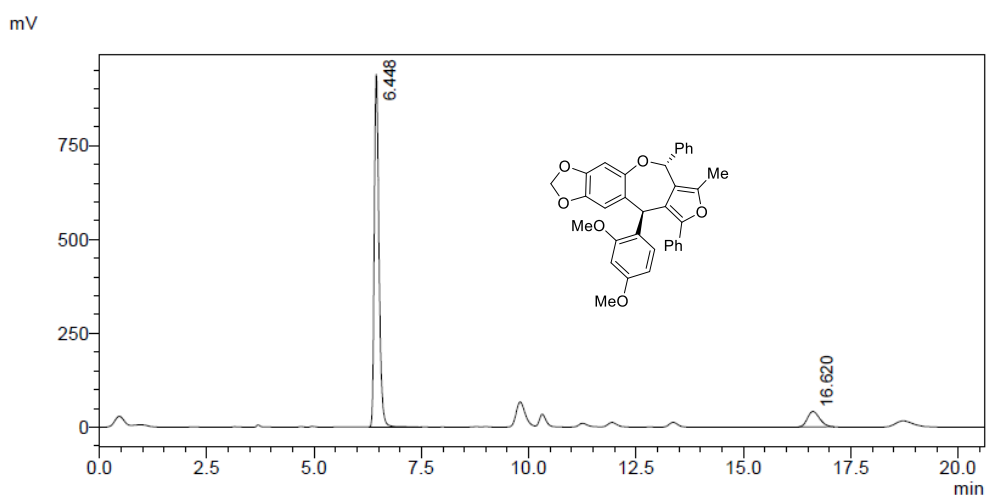

<Peak Table>

| Peak# | Ret. Time | Area    | Height | Area%   |
|-------|-----------|---------|--------|---------|
| 1     | 6.448     | 7158249 | 940314 | 89.860  |
| 2     | 16.620    | 807790  | 41162  | 10.140  |
|       |           | 7966039 | 981477 | 100.000 |

<Chromatogram>

mV

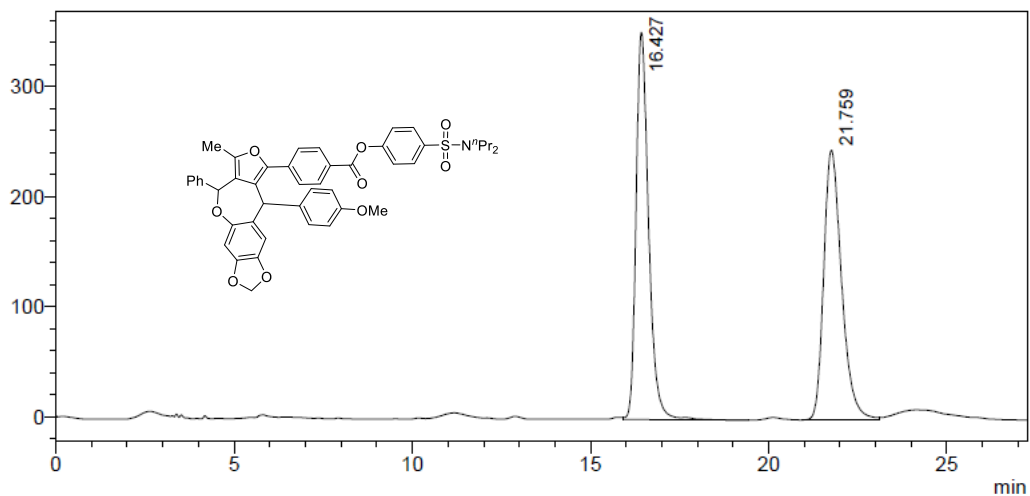

<Peak Table>

| Peak# | Ret. Time | Area     | Height | Area%   |
|-------|-----------|----------|--------|---------|
| 1     | 16.427    | 8598217  | 350995 | 50.147  |
| 2     | 21.759    | 8547796  | 244674 | 49.853  |
|       |           | 17146013 | 595669 | 100.000 |

<Chromatogram>

mV

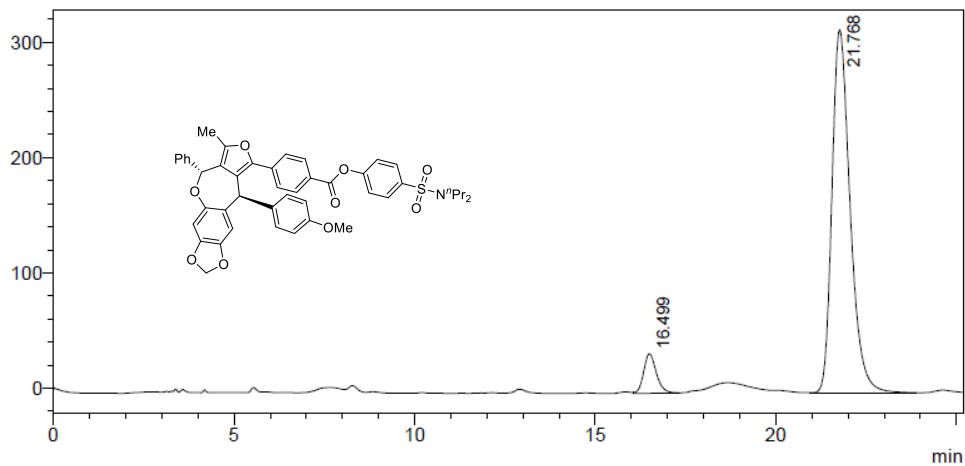

<Peak Table>

| Peak# | Ret. Time | Area     | Height | Area%   |
|-------|-----------|----------|--------|---------|
| 1     | 16.499    | 844667   | 34389  | 7.137   |
| 2     | 21.768    | 10991151 | 315034 | 92.863  |
|       |           | 11835818 | 349423 | 100.000 |

## HPLC chromatograph of 3ja on large-scale synthesis

<Chromatogram>

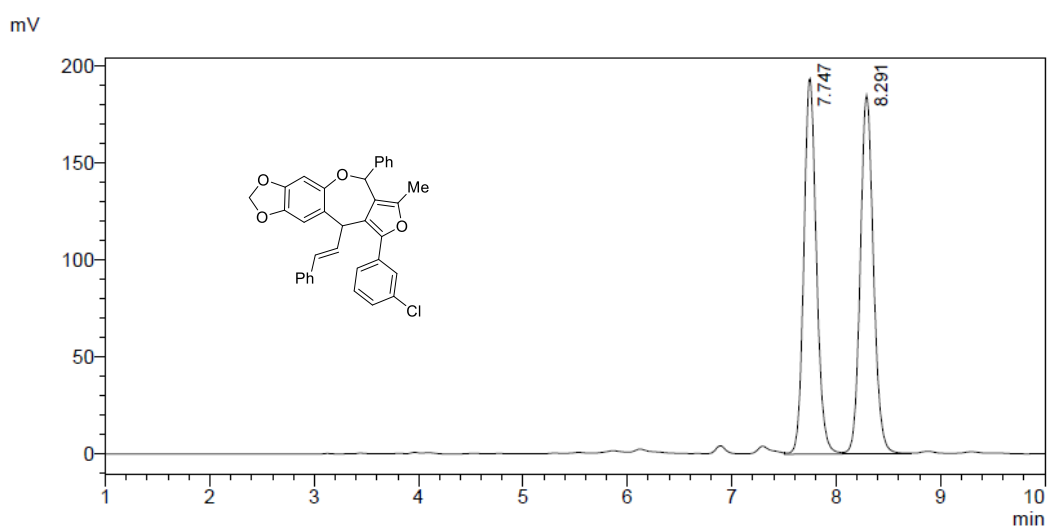

<Peak Table>

| Peak# | Ret. Time | Area    | Height | Area%   |
|-------|-----------|---------|--------|---------|
| 1     | 7.747     | 1619090 | 193658 | 49.871  |
| 2     | 8.291     | 1627447 | 185043 | 50.129  |
|       |           | 3246537 | 378701 | 100.000 |

<Chromatogram>

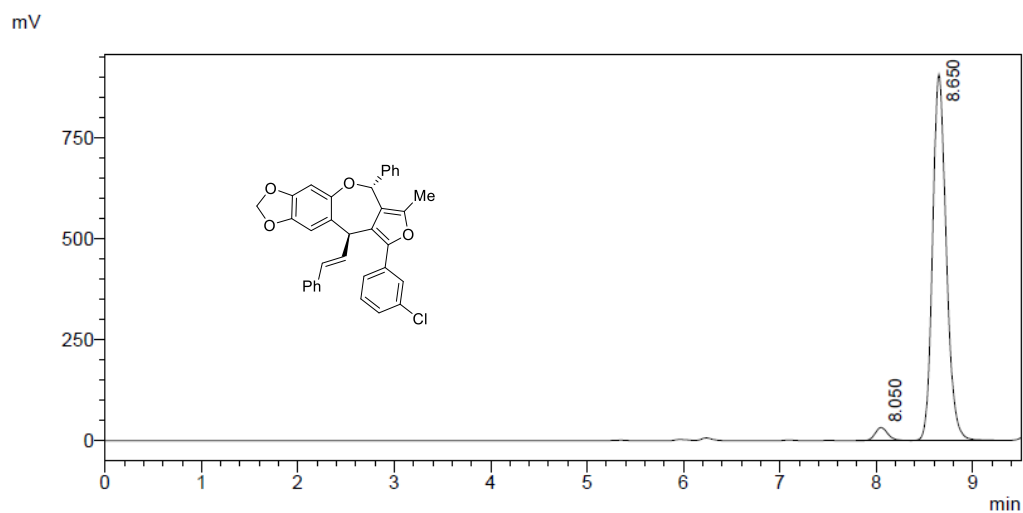

<Peak Table>

| Peak# | Ret. Time | Area    | Height | Area%   |
|-------|-----------|---------|--------|---------|
| 1     | 8.050     | 309359  | 32789  | 3.328   |
| 2     | 8.650     | 8986950 | 906602 | 96.672  |
|       |           | 9296309 | 939391 | 100.000 |

## HPLC chromatograph of 3aj on large-scale synthesis

<Chromatogram>

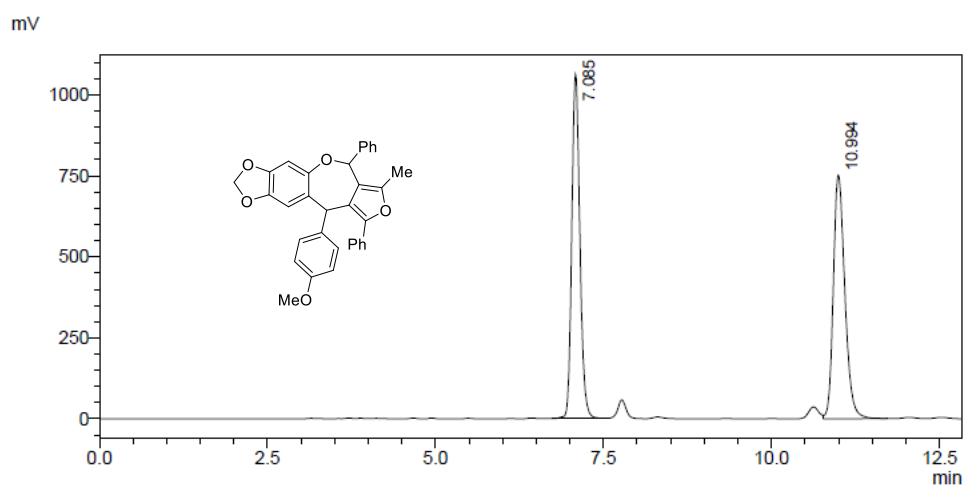

<Peak Table>

| Peak# | Ret. Time | Area     | Height  | Area%   |
|-------|-----------|----------|---------|---------|
| 1     | 7.085     | 8960371  | 1063437 | 50.003  |
| 2     | 10.994    | 8959404  | 751880  | 49.997  |
|       |           | 17919775 | 1815316 | 100.000 |

<Chromatogram>

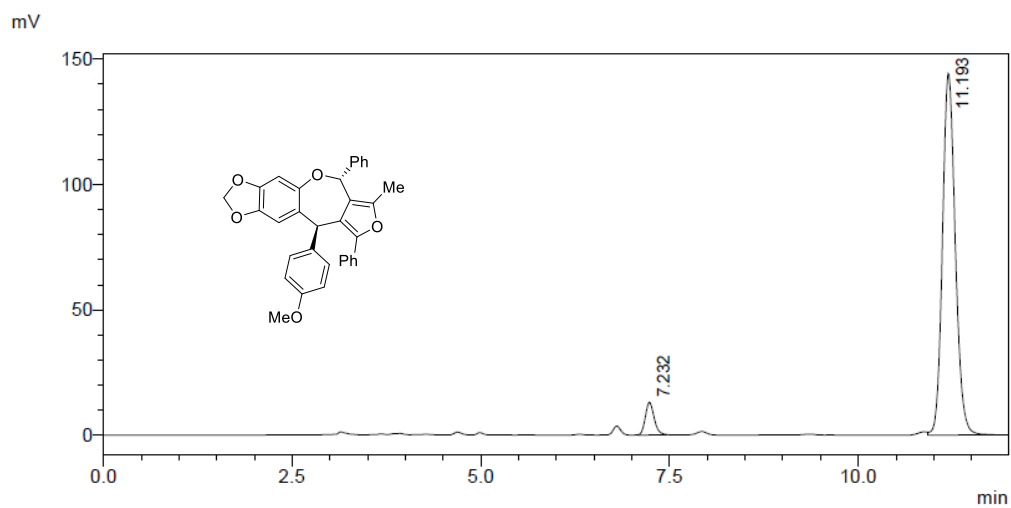

<Peak Table>

| Peak# | Ret. Time | Area    | Height | Area%   |
|-------|-----------|---------|--------|---------|
| 1     | 7.232     | 106001  | 13051  | 5.846   |
| 2     | 11.193    | 1707163 | 144311 | 94.154  |
|       |           | 1813164 | 157363 | 100.000 |
